# Supplementary material for: Genetic diversity of the chikungunya virus E2 gene and its implications for the efficacy of vaccines and therapeutic antibodies highlights the urgent need for a pan virus vaccine
Source: Research Square preprint supplement (doi:10.21203/rs.3.rs-7628294/v1), 2025-11-24
Supplement: Supplementary file 1 [file 3fba4fe6708bf0aff351d263.xlsx]

## Sheet: Table S1
Supplementary File 3: Table S1: Detailed information on haplotypes numbers per sequences in each haplotype
Haplotype	No. Sequences in the haplotype	Sequences accession No.
Hap_1	1	[NC_004162.2|East-Central-South-African]
Hap_2	3	[AB455493.1|East-Central-South-African GU434105.1|East-Central-South-African HM159390.1|East-Central-South-African]
Hap_3	53	[AB455494.1|East-Central-South-African AM258990.1|East-Central-South-African AM258992.1|East-Central-South-African AM258993.1|East-Central-South-African AM258994.1|East-Central-South-African AM258995.1|East-Central-South-African DQ443544.2|East-Central-South-African EF012359.1|East-Central-South-African EF027134.1|East-Central-South-African EF027135.1|East-Central-South-African EF027136.1|East-Ce…
Hap_4	45	[AB857730.1|East-Central-South-African AB857733.1|East-Central-South-African AB857743.1|East-Central-South-African AB857778.1|East-Central-South-African FJ000069.1|East-Central-South-African FJ445430.2|East-Central-South-African FJ445431.2|East-Central-South-African FJ445432.2|East-Central-South-African FJ445433.2|East-Central-South-African FJ445443.2|East-Central-South-African FJ445445.2|East-Ce…
Hap_5	1	[AB857771.1|East-Central-South-African]
Hap_6	1	[AB857781.1|East-Central-South-African]
Hap_7	22	[AB860301.3|Asian FJ807891.1|Asian KR559493.1|Asian KT308159.1|Asian KT308160.1|Asian KT308161.1|Asian KT308163.1|Asian KU561438.1|Asian KU561460.1|Asian KU561461.1|Asian KU561463.1|Asian KY703891.1|Asian KY703907.1|Asian KY703924.1|Asian KY703926.1|Asian KY703952.1|Asian KY703971.1|Asian KY703974.1|Asian KY703982.1|Asian LC259084.1|Asian MH647183.1|Asian MH647185.1|Asian]
Hap_8	1	[AF339485.1|East-Central-South-African]
Hap_9	8	[AF490259.3|East-Central-South-African HM045821.1|East-Central-South-African KJ679577.1|East-Central-South-African KX262990.1|East-Central-South-African MW581868.1|East-Central-South-African ON009843.1|East-Central-South-African OR283254.1|East-Central-South-African OR344786.1|East-Central-South-African]
Hap_10	1	[AM258991.1|East-Central-South-African]
Hap_11	1	[AY424803.1|Asian]
Hap_12	1	[AY726732.1|West_African]
Hap_13	1	[EF027139.1|East-Central-South-African]
Hap_14	1	[EF027140.1|Asian]
Hap_15	1	[EF027141.1|Asian]
Hap_16	4	[EF210157.2|East-Central-South-African HM045794.1|East-Central-South-African HM045801.1|East-Central-South-African MK120202.1|East-Central-South-African]
Hap_17	6	[EF452493.1|Asian HM045789.1|Asian HM045790.1|Asian HM045800.1|Asian HM045814.1|Asian KX262988.1|Asian]
Hap_18	3	[EF452494.1|Asian HM045797.1|Asian HM045808.1|Asian]
Hap_19	2	[EU037962.1|East-Central-South-African MK120201.1|East-Central-South-African]
Hap_20	18	[EU192143.1|Asian FJ807886.1|Asian FJ807888.1|Asian FJ807890.1|Asian FJ807897.1|Asian FR846307.1|Asian KC352904.1|Asian KC488650.1|Asian KF318729.1|Asian KU561439.1|Asian KU561440.1|Asian KU561441.1|Asian LC259083.1|Asian LC259088.1|Asian MF773562.1|Asian MF773564.1|Asian MF773565.1|Asian MH647193.1|Asian]
Hap_21	11	[EU244823.2|East-Central-South-African FJ000065.1|East-Central-South-African FJ807896.1|East-Central-South-African KF283986.1|East-Central-South-African KF578458.1|East-Central-South-African KF578459.1|East-Central-South-African KF818475.1|East-Central-South-African KJ941050.1|East-Central-South-African KX262993.1|East-Central-South-African KY575568.1|East-Central-South-African KY575571.1|East-Ce…
Hap_22	9	[EU703759.1|Asian EU703760.1|Asian EU703761.1|Asian EU703762.1|Asian FN295483.3|Asian KM923917.1|Asian KM923918.1|Asian KU561443.1|Asian KU561445.1|Asian]
Hap_23	1	[FJ000062.1|East-Central-South-African]
Hap_24	2	[FJ000063.1|East-Central-South-African FJ000064.1|East-Central-South-African]
Hap_25	1	[FJ000066.1|East-Central-South-African]
Hap_26	4	[FJ445426.2|East-Central-South-African FJ513632.1|East-Central-South-African FJ513645.1|East-Central-South-African FJ513654.1|East-Central-South-African]
Hap_27	1	[FJ445428.2|East-Central-South-African]
Hap_28	3	[FJ445510.2|East-Central-South-African FJ445511.2|East-Central-South-African GU199350.1|East-Central-South-African]
Hap_29	5	[FJ513628.1|East-Central-South-African FJ513629.1|East-Central-South-African FJ513657.1|East-Central-South-African GU013528.2|East-Central-South-African GU013530.2|East-Central-South-African]
Hap_30	3	[FJ513635.1|East-Central-South-African FJ513637.1|East-Central-South-African GU013529.2|East-Central-South-African]
Hap_31	1	[FJ513673.1|East-Central-South-African]
Hap_32	1	[FJ513675.1|East-Central-South-African]
Hap_33	1	[FJ513679.1|East-Central-South-African]
Hap_34	5	[FJ807887.1|Asian KC879559.1|Asian KC879560.1|Asian KC879565.1|Asian KC879570.1|Asian]
Hap_35	1	[FJ807889.1|Asian]
Hap_36	1	[FJ807892.1|East-Central-South-African]
Hap_37	21	[FJ807893.1|East-Central-South-African FJ807895.1|East-Central-South-African FR687341.1|East-Central-South-African FR687342.1|East-Central-South-African KF590564.1|East-Central-South-African KF590565.1|East-Central-South-African KF590566.1|East-Central-South-African KJ796847.1|East-Central-South-African KT324224.1|East-Central-South-African KT324225.1|East-Central-South-African KT324227.1|East-Ce…
Hap_38	1	[FJ807894.1|East-Central-South-African]
Hap_39	1	[FJ807898.1|East-Central-South-African]
Hap_40	2	[FJ807899.1|East-Central-South-African KP164869.1|East-Central-South-African]
Hap_41	1	[FN295484.2|Asian]
Hap_42	1	[FR687343.1|East-Central-South-African]
Hap_43	57	[FR846304.1|East-Central-South-African FR846305.1|East-Central-South-African HM159386.1|East-Central-South-African HM159388.1|East-Central-South-African JQ065890.1|East-Central-South-African JQ065891.1|East-Central-South-African JX442967.1|East-Central-South-African JX442968.1|East-Central-South-African KC614648.1|East-Central-South-African KF818472.1|East-Central-South-African KF818473.1|East-Ce…
Hap_44	2	[GQ168719.1|East-Central-South-African MF773568.1|East-Central-South-African]
Hap_45	1	[GQ428210.1|East-Central-South-African]
Hap_46	1	[GQ428213.1|East-Central-South-African]
Hap_47	1	[GQ428214.1|East-Central-South-African]
Hap_48	1	[GQ428215.1|East-Central-South-African]
Hap_49	2	[GU189061.1|East-Central-South-African MK028838.1|East-Central-South-African]
Hap_50	1	[GU301779.1|East-Central-South-African]
Hap_51	1	[GU434101.1|East-Central-South-African]
Hap_52	1	[GU434106.1|East-Central-South-African]
Hap_53	1	[GU434109.1|East-Central-South-African]
Hap_54	1	[GU434110.1|East-Central-South-African]
Hap_55	1	[GU562826.1|East-Central-South-African]
Hap_56	15	[GU562827.1|East-Central-South-African MH647191.1|East-Central-South-African MH647192.1|East-Central-South-African MH647194.1|East-Central-South-African MH647196.1|East-Central-South-African MH647198.1|East-Central-South-African MH647200.1|East-Central-South-African MH647201.1|East-Central-South-African MH647202.1|East-Central-South-African MH647203.1|East-Central-South-African MH647204.1|East-Ce…
Hap_57	2	[HE806461.1|Asian KU561451.1|Asian]
Hap_58	2	[HM038418.1|East-Central-South-African JN558834.1|East-Central-South-African]
Hap_59	1	[HM045784.1|East-Central-South-African]
Hap_60	2	[HM045785.1|West_African HM045798.1|West_African]
Hap_61	2	[HM045786.1|West_African HM045816.1|West_African]
Hap_62	1	[HM045787.1|Asian]
Hap_63	1	[HM045788.1|Asian]
Hap_64	1	[HM045791.1|Asian]
Hap_65	1	[HM045792.1|East-Central-South-African]
Hap_66	1	[HM045793.1|East-Central-South-African]
Hap_67	2	[HM045796.1|Asian HM045802.1|Asian]
Hap_68	1	[HM045803.1|Asian]
Hap_69	1	[HM045804.1|West_African]
Hap_70	1	[HM045806.1|East-Central-South-African]
Hap_71	1	[HM045807.1|West_African]
Hap_72	1	[HM045809.1|East-Central-South-African]
Hap_73	1	[HM045810.1|Asian]
Hap_74	1	[HM045811.1|East-Central-South-African]
Hap_75	1	[HM045812.1|East-Central-South-African]
Hap_76	1	[HM045813.1|Asian]
Hap_77	1	[HM045815.1|West_African]
Hap_78	1	[HM045817.1|West_African]
Hap_79	1	[HM045818.1|West_African]
Hap_80	1	[HM045819.1|West_African]
Hap_81	1	[HM045820.1|West_African]
Hap_82	2	[HM045822.1|East-Central-South-African KY038947.2|East-Central-South-African]
Hap_83	1	[HM045823.1|East-Central-South-African]
Hap_84	1	[HM159385.1|East-Central-South-African]
Hap_85	1	[HM159387.1|East-Central-South-African]
Hap_86	1	[HM159389.1|East-Central-South-African]
Hap_87	1	[HQ456252.1|East-Central-South-African]
Hap_88	2	[HQ456253.1|East-Central-South-African MK028836.1|East-Central-South-African]
Hap_89	3	[HQ529777.1|East-Central-South-African HQ848080.1|East-Central-South-African JN558835.1|East-Central-South-African]
Hap_90	3	[HQ529779.1|East-Central-South-African HQ848081.1|East-Central-South-African JN558836.1|East-Central-South-African]
Hap_91	4	[HQ846356.1|East-Central-South-African JQ065885.1|East-Central-South-African JQ065889.1|East-Central-South-African JX088705.1|East-Central-South-African]
Hap_92	1	[HQ846357.1|East-Central-South-African]
Hap_93	1	[JQ065888.1|East-Central-South-African]
Hap_94	1	[JQ065892.1|East-Central-South-African]
Hap_95	1	[JQ067624.1|East-Central-South-African]
Hap_96	14	[JQ861253.1|East-Central-South-African JQ861254.1|East-Central-South-African JQ861255.1|East-Central-South-African JQ861256.1|East-Central-South-African JQ861257.1|East-Central-South-African JQ861258.1|East-Central-South-African JQ861259.1|East-Central-South-African JQ861260.1|East-Central-South-African LN901356.1|East-Central-South-African LN901357.1|East-Central-South-African LN901358.1|East-Ce…
Hap_97	2	[KC862329.1|East-Central-South-African MF773569.1|East-Central-South-African]
Hap_98	1	[KC879562.1|Asian]
Hap_99	1	[KC879568.1|Asian]
Hap_100	1	[KF151174.1|East-Central-South-African]
Hap_101	1	[KF151175.1|East-Central-South-African]
Hap_102	1	[KF578457.1|East-Central-South-African]
Hap_103	15	[KF872195.1|Asian KU561444.1|Asian LC259085.1|Asian LC259087.1|Asian MT591086.1|Asian MT591087.1|Asian MT591088.1|Asian MT591089.1|Asian MT591090.1|Asian MT591091.1|Asian MT591092.1|Asian MT591093.1|Asian MT591094.1|Asian MT591095.1|Asian OK655884.1|Asian]
Hap_104	4	[KJ451622.1|Asian KJ451623.1|Asian KJ689452.1|Asian KJ689453.1|Asian]
Hap_105	5	[KJ451624.1|Asian MT228631.1|Asian MT228632.1|Asian MT228633.1|Asian OL343608.1|Asian]
Hap_106	2	[KJ579184.1|East-Central-South-African KJ579185.1|East-Central-South-African]
Hap_107	1	[KJ579186.1|East-Central-South-African]
Hap_108	9	[KJ796844.1|East-Central-South-African KJ796845.1|East-Central-South-African KJ796846.1|East-Central-South-African KT336777.1|East-Central-South-African MH647188.1|East-Central-South-African MH647189.1|East-Central-South-African MH647190.1|East-Central-South-African MH647195.1|East-Central-South-African MH647205.1|East-Central-South-African]
Hap_109	22	[KM673291.1|Asian KU561447.1|Asian KU561449.1|Asian KU561450.1|Asian KU561453.1|Asian KU561454.1|Asian KU561455.1|Asian KU561456.1|Asian KU561458.1|Asian KX097982.1|Asian KX097986.1|Asian KX097988.1|Asian KY883764.1|Asian LC259091.1|Asian MT591096.1|Asian MT591097.1|Asian MT591098.1|Asian MT591099.1|Asian MT591100.1|Asian MT591102.1|Asian MT591103.1|Asian MT591104.1|Asian]
Hap_110	1	[KP003812.1|East-Central-South-African]
Hap_111	1	[KP003813.2|East-Central-South-African]
Hap_112	114	[KP164567.1|Asian KP164571.1|Asian KP164572.1|Asian KP851709.1|Asian KP851710.1|Asian KR002040.1|Asian KR046228.1|Asian KR046229.1|Asian KR046230.1|Asian KR046234.1|Asian KX262991.1|Asian KY272961.1|Asian KY272962.1|Asian KY272965.1|Asian KY272966.1|Asian KY272967.1|Asian KY272969.1|Asian KY272970.1|Asian KY435455.1|Asian KY680350.1|Asian KY680351.1|Asian KY680353.1|Asian KY680354.1|Asian LC25909…
Hap_113	37	[KP164568.1|East-Central-South-African KP164569.1|East-Central-South-African KP164570.1|East-Central-South-African KU940225.1|East-Central-South-African KX228391.1|East-Central-South-African KY055011.1|East-Central-South-African KY704943.1|East-Central-South-African KY704944.1|East-Central-South-African KY704950.1|East-Central-South-African KY704952.1|East-Central-South-African KY704955.1|East-Ce…
Hap_114	248	[KR046227.1|Asian KR046231.1|Asian KR046232.1|Asian KR264949.1|Asian KR264951.1|Asian KR559471.1|Asian KR559472.1|Asian KR559473.1|Asian KR559474.1|Asian KR559475.1|Asian KR559476.1|Asian KR559478.1|Asian KR559479.1|Asian KR559481.1|Asian KR559482.1|Asian KR559483.1|Asian KR559484.1|Asian KR559485.1|Asian KR559486.1|Asian KR559487.1|Asian KR559488.1|Asian KR559490.1|Asian KR559491.1|Asian KR55949…
Hap_115	1	[KR046233.1|Asian]
Hap_116	1	[KR264950.1|Asian]
Hap_117	1	[KR559470.1|Asian]
Hap_118	4	[KR559477.1|Asian KY272964.1|Asian KY703911.1|Asian KY703972.1|Asian]
Hap_119	1	[KR559489.1|Asian]
Hap_120	1	[KT192707.1|Asian]
Hap_121	1	[KT308162.1|Asian]
Hap_122	1	[KT324226.1|East-Central-South-African]
Hap_123	5	[KT327163.2|Asian KT327164.1|Asian KT327165.2|Asian KT327166.2|Asian KY435486.1|Asian]
Hap_124	19	[KT336778.1|East-Central-South-African KX619426.1|East-Central-South-African KY751908.1|East-Central-South-African MF774615.1|East-Central-South-African MF774616.1|East-Central-South-African MF774617.1|East-Central-South-African MF774619.1|East-Central-South-African MH124571.1|East-Central-South-African MH124578.1|East-Central-South-African MH347343.1|East-Central-South-African MH349097.1|East-Ce…
Hap_125	1	[KT336779.1|East-Central-South-African]
Hap_126	2	[KT336780.1|East-Central-South-African KT336783.1|East-Central-South-African]
Hap_127	2	[KT336781.1|East-Central-South-African KT336793.1|East-Central-South-African]
Hap_128	1	[KT336782.1|East-Central-South-African]
Hap_129	2	[KT336784.1|East-Central-South-African KT336786.1|East-Central-South-African]
Hap_130	1	[KT336787.1|East-Central-South-African]
Hap_131	1	[KT336788.1|East-Central-South-African]
Hap_132	4	[KT336789.1|East-Central-South-African KT336790.1|East-Central-South-African KT336792.1|East-Central-South-African KT336796.1|East-Central-South-African]
Hap_133	2	[KT336794.1|East-Central-South-African KT336795.1|East-Central-South-African]
Hap_134	1	[KT336797.1|East-Central-South-African]
Hap_135	1	[KT336799.1|East-Central-South-African]
Hap_136	1	[KU295117.1|Asian]
Hap_137	1	[KU295118.1|Asian]
Hap_138	9	[KU295119.1|Asian KU295120.1|Asian KU295121.1|Asian KU295123.1|Asian KU295124.1|Asian KU295125.1|Asian KU295128.1|Asian KU295129.1|Asian KU295130.1|Asian]
Hap_139	1	[KU295122.1|Asian]
Hap_140	1	[KU295126.1|Asian]
Hap_141	1	[KU295127.1|Asian]
Hap_142	4	[KU355832.1|Asian KY703948.1|Asian KY703966.1|Asian MN462658.1|Asian]
Hap_143	1	[KU561430.1|East-Central-South-African]
Hap_144	1	[KU561431.1|East-Central-South-African]
Hap_145	1	[KU561434.1|East-Central-South-African]
Hap_146	20	[KU561435.1|East-Central-South-African LN901341.1|East-Central-South-African LN901344.1|East-Central-South-African LN901345.1|East-Central-South-African LN901346.1|East-Central-South-African LN901347.1|East-Central-South-African LN901348.1|East-Central-South-African LN901349.1|East-Central-South-African LN901350.1|East-Central-South-African LN901354.1|East-Central-South-African LN901355.1|East-Ce…
Hap_147	1	[KU561436.1|Asian]
Hap_148	1	[KU561437.1|Asian]
Hap_149	1	[KU561442.1|Asian]
Hap_150	1	[KU561446.1|Asian]
Hap_151	1	[KU561448.1|Asian]
Hap_152	1	[KU561452.1|Asian]
Hap_153	1	[KU561457.1|Asian]
Hap_154	1	[KU561459.1|Asian]
Hap_155	1	[KU561462.1|Asian]
Hap_156	1	[KU561464.1|Asian]
Hap_157	1	[KU561465.1|Asian]
Hap_158	1	[KU561466.1|Asian]
Hap_159	1	[KX168429.1|Asian]
Hap_160	2	[KX262986.1|West_African MK028837.1|West_African]
Hap_161	1	[KX262987.1|Asian]
Hap_162	1	[KX262995.1|West_African]
Hap_163	1	[KX262996.1|East-Central-South-African]
Hap_164	1	[KX496989.1|Asian]
Hap_165	1	[KX619422.1|East-Central-South-African]
Hap_166	3	[KX619424.1|East-Central-South-African MK551552.1|East-Central-South-African MK551553.1|East-Central-South-African]
Hap_167	1	[KX619425.1|East-Central-South-African]
Hap_168	1	[KX702401.1|Asian]
Hap_169	1	[KY038946.1|East-Central-South-African]
Hap_170	398	[KY124328.1|East-Central-South-African KY124329.1|East-Central-South-African MG000876.1|East-Central-South-African MG649970.1|East-Central-South-African MG649971.1|East-Central-South-African MG649972.1|East-Central-South-African MG649973.1|East-Central-South-African MG649974.1|East-Central-South-African MG649976.1|East-Central-South-African MG649977.1|East-Central-South-African MG649978.1|East-Ce…
Hap_171	1	[KY435454.1|Asian]
Hap_172	1	[KY575567.1|East-Central-South-African]
Hap_173	1	[KY575570.1|East-Central-South-African]
Hap_174	1	[KY575574.1|East-Central-South-African]
Hap_175	1	[KY680348.1|Asian]
Hap_176	1	[KY680356.1|Asian]
Hap_177	1	[KY680357.1|Asian]
Hap_178	1	[KY680358.1|Asian]
Hap_179	1	[KY680360.1|Asian]
Hap_180	2	[KY680368.1|Asian KY680412.1|Asian]
Hap_181	1	[KY680405.1|Asian]
Hap_182	1	[KY703915.1|Asian]
Hap_183	1	[KY703961.1|Asian]
Hap_184	1	[KY703978.1|Asian]
Hap_185	2	[KY703986.1|Asian OL343617.1|Asian]
Hap_186	1	[KY704002.1|Asian]
Hap_187	2	[KY704934.1|East-Central-South-African KY704946.1|East-Central-South-African]
Hap_188	1	[KY704954.1|East-Central-South-African]
Hap_189	1	[L37661.3|Asian]
Hap_190	1	[LC259082.1|Asian]
Hap_191	1	[LC259086.1|Asian]
Hap_192	1	[LC259089.1|Asian]
Hap_193	1	[LC259092.1|Asian]
Hap_194	1	[LC259093.1|East-Central-South-African]
Hap_195	1	[LC259094.1|East-Central-South-African]
Hap_196	1	[LC331252.1|East-Central-South-African]
Hap_197	152	[LC580236.1|East-Central-South-African LC580239.1|East-Central-South-African LC580250.1|East-Central-South-African LC580252.1|East-Central-South-African LC580253.1|East-Central-South-African LC580254.1|East-Central-South-African LC580255.1|East-Central-South-African LC580256.1|East-Central-South-African LC580257.1|East-Central-South-African LC580259.1|East-Central-South-African LC580260.1|East-Ce…
Hap_198	2	[LC580238.1|East-Central-South-African LC664160.1|East-Central-South-African]
Hap_199	23	[LC580240.1|East-Central-South-African LC580242.1|East-Central-South-African LC580245.1|East-Central-South-African LC580248.1|East-Central-South-African MH400249.1|East-Central-South-African MH507158.1|East-Central-South-African MK468608.1|East-Central-South-African MN630017.1|East-Central-South-African MN756625.1|East-Central-South-African MN871956.1|East-Central-South-African MN871958.1|East-Ce…
Hap_200	2	[LC580241.1|East-Central-South-African LC580244.1|East-Central-South-African]
Hap_201	1	[LC580243.1|East-Central-South-African]
Hap_202	1	[LC580249.1|East-Central-South-African]
Hap_203	1	[LC580251.1|East-Central-South-African]
Hap_204	1	[LC580258.1|East-Central-South-African]
Hap_205	2	[LC580263.1|East-Central-South-African LC598203.1|East-Central-South-African]
Hap_206	1	[LC580265.1|East-Central-South-African]
Hap_207	18	[LC664141.1|East-Central-South-African LC664142.1|East-Central-South-African LC664143.1|East-Central-South-African LC664146.1|East-Central-South-African LC664147.1|East-Central-South-African LC664148.1|East-Central-South-African LC664149.1|East-Central-South-African LC664150.1|East-Central-South-African LC664151.1|East-Central-South-African LC664153.1|East-Central-South-African LC664155.1|East-Ce…
Hap_208	3	[LC664144.1|East-Central-South-African LC664145.1|East-Central-South-African LC664154.1|East-Central-South-African]
Hap_209	1	[LC664152.1|East-Central-South-African]
Hap_210	1	[LC664157.1|East-Central-South-African]
Hap_211	1	[LC664161.1|East-Central-South-African]
Hap_212	1	[LC664163.1|East-Central-South-African]
Hap_213	1	[LN901351.1|East-Central-South-African]
Hap_214	1	[MF001511.1|Asian]
Hap_215	2	[MF001515.1|Asian OQ148657.1|Asian]
Hap_216	1	[MF001518.1|Asian]
Hap_217	1	[MF346356.1|East-Central-South-African]
Hap_218	2	[MF346357.1|East-Central-South-African MH347342.1|East-Central-South-African]
Hap_219	3	[MF346358.1|East-Central-South-African MF346359.1|East-Central-South-African MK370032.1|East-Central-South-African]
Hap_220	2	[MF580946.1|East-Central-South-African PP862724.1|East-Central-South-African]
Hap_221	1	[MF773559.1|Asian]
Hap_222	1	[MF773561.1|Asian]
Hap_223	1	[MF773563.1|Asian]
Hap_224	1	[MF773566.1|East-Central-South-African]
Hap_225	1	[MF774614.1|East-Central-South-African]
Hap_226	1	[MF774618.1|East-Central-South-African]
Hap_227	1	[MG280943.1|East-Central-South-African]
Hap_228	1	[MG649975.1|East-Central-South-African]
Hap_229	1	[MG649979.1|East-Central-South-African]
Hap_230	1	[MG664851.1|Asian]
Hap_231	2	[MG912993.1|East-Central-South-African PP193832.1|East-Central-South-African]
Hap_232	3	[MG925665.1|East-Central-South-African PV626819.1|East-Central-South-African PV626821.1|East-Central-South-African]
Hap_233	2	[MH124570.2|East-Central-South-African MH124573.1|East-Central-South-African]
Hap_234	9	[MH124575.1|East-Central-South-African MW581869.1|East-Central-South-African MW581870.1|East-Central-South-African MW581871.1|East-Central-South-African MW581875.1|East-Central-South-African MW581876.1|East-Central-South-African MW581879.1|East-Central-South-African MW581882.1|East-Central-South-African MW581883.1|East-Central-South-African]
Hap_235	1	[MH329295.1|Asian]
Hap_236	1	[MH347340.1|East-Central-South-African]
Hap_237	1	[MH347341.1|East-Central-South-African]
Hap_238	1	[MH347344.1|East-Central-South-African]
Hap_239	1	[MH358395.1|East-Central-South-African]
Hap_240	1	[MH423800.1|East-Central-South-African]
Hap_241	1	[MH423806.1|East-Central-South-African]
Hap_242	1	[MH481882.1|Asian]
Hap_243	1	[MH481895.1|Asian]
Hap_244	1	[MH647182.1|East-Central-South-African]
Hap_245	1	[MH647197.1|East-Central-South-African]
Hap_246	1	[MH647199.1|East-Central-South-African]
Hap_247	2	[MH647210.1|East-Central-South-African MH647211.1|East-Central-South-African]
Hap_248	1	[MH670649.1|Asian]
Hap_249	5	[MH823663.1|East-Central-South-African MH823665.1|East-Central-South-African MH823667.1|East-Central-South-African MH823668.1|East-Central-South-African OP964936.1|East-Central-South-African]
Hap_250	2	[MK028839.1|Asian MW473668.1|Asian]
Hap_251	1	[MK028840.1|Asian]
Hap_252	1	[MK121895.1|East-Central-South-African]
Hap_253	1	[MK163628.1|East-Central-South-African]
Hap_254	1	[MK240311.1|Asian]
Hap_255	1	[MK286893.1|East-Central-South-African]
Hap_256	1	[MK286894.1|East-Central-South-African]
Hap_257	1	[MK286895.1|East-Central-South-African]
Hap_258	1	[MK286896.1|East-Central-South-African]
Hap_259	1	[MK286897.1|East-Central-South-African]
Hap_260	1	[MK286898.1|East-Central-South-African]
Hap_261	1	[MK286899.1|East-Central-South-African]
Hap_262	1	[MK370030.1|East-Central-South-African]
Hap_263	1	[MK370031.1|East-Central-South-African]
Hap_264	1	[MK370033.1|East-Central-South-African]
Hap_265	1	[MK468622.1|East-Central-South-African]
Hap_266	1	[MK473622.1|East-Central-South-African]
Hap_267	1	[MK473626.1|East-Central-South-African]
Hap_268	15	[MK473627.1|East-Central-South-African MT023791.1|East-Central-South-African MT380157.1|East-Central-South-African MT380158.1|East-Central-South-African MT380160.1|East-Central-South-African MT380161.1|East-Central-South-African MT526798.1|East-Central-South-African MT526799.1|East-Central-South-African MT526800.1|East-Central-South-African MT526802.1|East-Central-South-African MT526804.1|East-Ce…
Hap_269	1	[MK473628.1|East-Central-South-African]
Hap_270	1	[MK518340.1|East-Central-South-African]
Hap_271	13	[MK518395.1|East-Central-South-African MT526901.1|East-Central-South-African MT526902.1|East-Central-South-African MT526903.1|East-Central-South-African MT526904.1|East-Central-South-African OP312941.1|East-Central-South-African OP312950.1|East-Central-South-African OP312967.1|East-Central-South-African OQ148637.1|East-Central-South-African OQ148658.1|East-Central-South-African PP336967.1|East-Ce…
Hap_272	4	[MK690206.1|East-Central-South-African MK935343.1|East-Central-South-African MK935344.1|East-Central-South-African OR037306.2|East-Central-South-African]
Hap_273	2	[MK993756.1|East-Central-South-African MK993757.1|East-Central-South-African]
Hap_274	1	[MN075149.1|East-Central-South-African]
Hap_275	1	[MN158171.1|East-Central-South-African]
Hap_276	1	[MN271692.1|East-Central-South-African]
Hap_277	1	[MN402884.1|East-Central-South-African]
Hap_278	1	[MN402885.1|East-Central-South-African]
Hap_279	1	[MN402886.1|East-Central-South-African]
Hap_280	1	[MN402887.1|East-Central-South-African]
Hap_281	1	[MN402888.1|East-Central-South-African]
Hap_282	6	[MN402891.1|East-Central-South-African MN974203.1|East-Central-South-African PV022117.1|East-Central-South-African PV879489.1|East-Central-South-African PV879491.1|East-Central-South-African PV879499.1|East-Central-South-African]
Hap_283	16	[MN428511.1|East-Central-South-African MT933035.1|East-Central-South-African MT933036.1|East-Central-South-African MT933051.1|East-Central-South-African MW260518.1|East-Central-South-African OQ759663.1|East-Central-South-African OQ759748.1|East-Central-South-African OQ759760.1|East-Central-South-African OQ759766.1|East-Central-South-African OQ759777.1|East-Central-South-African OQ759802.1|East-Ce…
Hap_284	7	[MN428515.1|East-Central-South-African MT933038.1|East-Central-South-African MW260512.1|East-Central-South-African OQ759654.1|East-Central-South-African OQ759782.1|East-Central-South-African OQ759793.1|East-Central-South-African OR167301.1|East-Central-South-African]
Hap_285	6	[MN462640.1|Asian MN462641.1|Asian MN462643.1|Asian MN462644.1|Asian MN462645.1|Asian MN462648.1|Asian]
Hap_286	1	[MN462653.1|Asian]
Hap_287	1	[MN462662.1|Asian]
Hap_288	1	[MN871959.1|East-Central-South-African]
Hap_289	1	[MN871973.1|East-Central-South-African]
Hap_290	2	[MN954552.1|East-Central-South-African PP896919.1|East-Central-South-African]
Hap_291	1	[MN974209.1|East-Central-South-African]
Hap_292	1	[MN974211.1|East-Central-South-African]
Hap_293	1	[MN974212.1|East-Central-South-African]
Hap_294	1	[MN974213.1|East-Central-South-African]
Hap_295	1	[MN974216.1|East-Central-South-African]
Hap_296	1	[MN974218.1|East-Central-South-African]
Hap_297	1	[MN974219.1|East-Central-South-African]
Hap_298	1	[MN974222.1|East-Central-South-African]
Hap_299	1	[MT150095.1|Asian]
Hap_300	8	[MT380146.1|East-Central-South-African MT380147.1|East-Central-South-African MT380148.1|East-Central-South-African MT380149.1|East-Central-South-African MT380150.1|East-Central-South-African MT380151.1|East-Central-South-African MT380153.1|East-Central-South-African MT380156.1|East-Central-South-African]
Hap_301	1	[MT380152.1|East-Central-South-African]
Hap_302	1	[MT380154.1|East-Central-South-African]
Hap_303	1	[MT380155.1|East-Central-South-African]
Hap_304	1	[MT526796.1|East-Central-South-African]
Hap_305	1	[MT591083.1|Asian]
Hap_306	1	[MT591085.1|Asian]
Hap_307	1	[MT591105.1|Asian]
Hap_308	1	[MT591106.1|Asian]
Hap_309	1	[MT591107.1|Asian]
Hap_310	12	[MT636907.1|East-Central-South-African MT636908.1|East-Central-South-African MT636909.1|East-Central-South-African MT636910.1|East-Central-South-African MT636911.1|East-Central-South-African MT636912.1|East-Central-South-African MT636913.1|East-Central-South-African MT636914.1|East-Central-South-African MT636915.1|East-Central-South-African MT636917.1|East-Central-South-African MT636918.1|East-Ce…
Hap_311	1	[MT636920.1|East-Central-South-African]
Hap_312	2	[MT640255.1|East-Central-South-African MT640256.1|East-Central-South-African]
Hap_313	3	[MT666071.1|East-Central-South-African MT666072.1|East-Central-South-African MW281311.1|East-Central-South-African]
Hap_314	82	[MT666073.1|East-Central-South-African PV035814.1|East-Central-South-African PV593524.2|East-Central-South-African PV685522.1|East-Central-South-African PV685523.1|East-Central-South-African PV685524.1|East-Central-South-African PV685525.1|East-Central-South-African PV685526.1|East-Central-South-African PV685528.1|East-Central-South-African PV685529.1|East-Central-South-African PV685530.1|East-Ce…
Hap_315	44	[MT933032.1|East-Central-South-African MT933034.1|East-Central-South-African MT933047.1|East-Central-South-African ON586961.1|East-Central-South-African ON586965.1|East-Central-South-African ON586967.1|East-Central-South-African ON586968.1|East-Central-South-African OP485445.1|East-Central-South-African OP485451.1|East-Central-South-African OQ759714.1|East-Central-South-African OQ759742.1|East-Ce…
Hap_316	1	[MT933037.1|East-Central-South-African]
Hap_317	1	[MT933039.1|East-Central-South-African]
Hap_318	2	[MT933042.1|East-Central-South-African OQ775409.1|East-Central-South-African]
Hap_319	2	[MT933043.1|East-Central-South-African OQ760043.1|East-Central-South-African]
Hap_320	2	[MT933044.1|East-Central-South-African OQ759877.1|East-Central-South-African]
Hap_321	1	[MT933049.1|East-Central-South-African]
Hap_322	1	[MT933050.1|East-Central-South-African]
Hap_323	1	[MW042254.1|East-Central-South-African]
Hap_324	1	[MW110474.1|East-Central-South-African]
Hap_325	2	[MW260517.1|East-Central-South-African OK562599.1|East-Central-South-African]
Hap_326	1	[MW581864.1|East-Central-South-African]
Hap_327	1	[MW581867.1|East-Central-South-African]
Hap_328	1	[MW581877.1|East-Central-South-African]
Hap_329	1	[MW581881.1|East-Central-South-African]
Hap_330	2	[MW588418.1|East-Central-South-African MW588419.1|East-Central-South-African]
Hap_331	1	[MW656171.1|Asian]
Hap_332	1	[MZ292729.1|Asian]
Hap_333	2	[MZ292730.1|East-Central-South-African MZ292731.1|East-Central-South-African]
Hap_334	1	[MZ292733.1|East-Central-South-African]
Hap_335	1	[MZ443813.1|East-Central-South-African]
Hap_336	1	[MZ443814.1|East-Central-South-African]
Hap_337	1	[MZ443815.1|East-Central-South-African]
Hap_338	1	[MZ443816.1|East-Central-South-African]
Hap_339	26	[OK139083.1|East-Central-South-African ON838556.1|East-Central-South-African ON838557.1|East-Central-South-African ON887079.1|East-Central-South-African ON887080.1|East-Central-South-African ON887081.1|East-Central-South-African OQ605447.1|East-Central-South-African OQ605452.1|East-Central-South-African OQ605453.1|East-Central-South-African OQ605454.1|East-Central-South-African OR470609.1|East-Ce…
Hap_340	2	[OK316989.1|Asian OK316990.1|Asian]
Hap_341	1	[OK316991.1|Asian]
Hap_342	1	[OK316992.1|Asian]
Hap_343	1	[OK316993.1|Asian]
Hap_344	1	[OK316994.1|Asian]
Hap_345	2	[OK316995.1|Asian OK316996.1|Asian]
Hap_346	1	[OK562600.1|East-Central-South-African]
Hap_347	1	[OK562603.1|East-Central-South-African]
Hap_348	2	[OK655882.1|Asian OK655883.1|Asian]
Hap_349	2	[OL343609.1|Asian OL343611.1|Asian]
Hap_350	1	[OL343610.1|Asian]
Hap_351	1	[OL343613.1|Asian]
Hap_352	1	[OL343614.1|Asian]
Hap_353	1	[OL343615.1|Asian]
Hap_354	1	[OL343616.1|Asian]
Hap_355	2	[OL705486.1|East-Central-South-African OL741630.1|East-Central-South-African]
Hap_356	1	[OL898665.1|East-Central-South-African]
Hap_357	1	[OL898672.1|East-Central-South-African]
Hap_358	1	[OL898703.1|East-Central-South-African]
Hap_359	1	[OL898711.1|East-Central-South-African]
Hap_360	1	[OL999095.1|East-Central-South-African]
Hap_361	2	[OM128434.1|East-Central-South-African OQ759840.1|East-Central-South-African]
Hap_362	1	[ON009842.1|East-Central-South-African]
Hap_363	1	[ON262792.1|East-Central-South-African]
Hap_364	1	[ON262793.1|East-Central-South-African]
Hap_365	1	[ON262794.1|East-Central-South-African]
Hap_366	1	[ON586954.1|East-Central-South-African]
Hap_367	1	[OP312939.1|East-Central-South-African]
Hap_368	2	[OP312947.1|East-Central-South-African OP312958.1|East-Central-South-African]
Hap_369	1	[OP312963.1|East-Central-South-African]
Hap_370	1	[OP485447.1|East-Central-South-African]
Hap_371	1	[OP485449.1|East-Central-South-African]
Hap_372	1	[OP485452.1|East-Central-South-African]
Hap_373	1	[OP485455.1|East-Central-South-African]
Hap_374	1	[OP964963.1|East-Central-South-African]
Hap_375	1	[OQ148634.1|East-Central-South-African]
Hap_376	1	[OQ148638.1|East-Central-South-African]
Hap_377	1	[OQ148644.1|East-Central-South-African]
Hap_378	1	[OQ148649.1|East-Central-South-African]
Hap_379	2	[OQ148654.1|Asian OQ148655.1|Asian]
Hap_380	1	[OQ230631.1|East-Central-South-African]
Hap_381	1	[OQ320495.1|East-Central-South-African]
Hap_382	245	[OQ567722.1|East-Central-South-African OQ567723.1|East-Central-South-African OQ567724.1|East-Central-South-African OQ567725.1|East-Central-South-African OQ567726.1|East-Central-South-African OQ567727.1|East-Central-South-African OQ567728.1|East-Central-South-African OQ616985.1|East-Central-South-African OQ616986.1|East-Central-South-African OQ616987.1|East-Central-South-African OQ616988.1|East-Ce…
Hap_383	1	[OQ605434.1|East-Central-South-African]
Hap_384	1	[OQ605436.1|East-Central-South-African]
Hap_385	1	[OQ605437.1|East-Central-South-African]
Hap_386	2	[OQ605438.1|East-Central-South-African OQ605444.1|East-Central-South-African]
Hap_387	2	[OQ605439.1|East-Central-South-African PP896916.1|East-Central-South-African]
Hap_388	1	[OQ605440.1|East-Central-South-African]
Hap_389	2	[OQ605441.1|East-Central-South-African OQ605442.1|East-Central-South-African]
Hap_390	1	[OQ605443.1|East-Central-South-African]
Hap_391	1	[OQ605445.1|East-Central-South-African]
Hap_392	1	[OQ605446.1|East-Central-South-African]
Hap_393	1	[OQ605448.1|East-Central-South-African]
Hap_394	1	[OQ605450.1|East-Central-South-African]
Hap_395	1	[OQ605451.1|East-Central-South-African]
Hap_396	41	[OQ759655.1|East-Central-South-African OQ775397.1|East-Central-South-African OQ775432.1|East-Central-South-African OQ775446.1|East-Central-South-African OQ775448.1|East-Central-South-African OQ775453.1|East-Central-South-African OQ775458.1|East-Central-South-African OQ775459.1|East-Central-South-African OQ775461.1|East-Central-South-African OQ775462.1|East-Central-South-African OQ775463.1|East-Ce…
Hap_397	1	[OQ759656.1|East-Central-South-African]
Hap_398	1	[OQ759662.1|East-Central-South-African]
Hap_399	2	[OQ759664.1|East-Central-South-African OR167347.1|East-Central-South-African]
Hap_400	1	[OQ759675.1|East-Central-South-African]
Hap_401	9	[OQ759678.1|East-Central-South-African OQ759688.1|East-Central-South-African OQ759694.1|East-Central-South-African OQ759702.1|East-Central-South-African OQ759703.1|East-Central-South-African OR064024.1|East-Central-South-African OR064030.1|East-Central-South-African OR167297.1|East-Central-South-African OR167320.1|East-Central-South-African]
Hap_402	2	[OQ759681.1|East-Central-South-African OQ759711.1|East-Central-South-African]
Hap_403	2	[OQ759682.1|East-Central-South-African OQ759707.1|East-Central-South-African]
Hap_404	4	[OQ759706.1|East-Central-South-African OQ759713.1|East-Central-South-African OQ759715.1|East-Central-South-African OQ759716.1|East-Central-South-African]
Hap_405	1	[OQ759718.1|East-Central-South-African]
Hap_406	1	[OQ759732.1|East-Central-South-African]
Hap_407	2	[OQ759736.1|East-Central-South-African OQ759740.1|East-Central-South-African]
Hap_408	1	[OQ759745.1|East-Central-South-African]
Hap_409	1	[OQ759747.1|East-Central-South-African]
Hap_410	1	[OQ759751.1|East-Central-South-African]
Hap_411	2	[OQ759755.1|East-Central-South-African OQ759757.1|East-Central-South-African]
Hap_412	1	[OQ759785.1|East-Central-South-African]
Hap_413	1	[OQ759786.1|East-Central-South-African]
Hap_414	36	[OQ759795.1|East-Central-South-African OQ759818.1|East-Central-South-African OQ759931.1|East-Central-South-African OQ759938.1|East-Central-South-African OQ759941.1|East-Central-South-African OQ759944.1|East-Central-South-African OQ759945.1|East-Central-South-African OQ759947.1|East-Central-South-African OQ759949.1|East-Central-South-African OQ759950.1|East-Central-South-African OQ759951.1|East-Ce…
Hap_415	18	[OQ759798.1|East-Central-South-African OQ759799.1|East-Central-South-African OQ759800.1|East-Central-South-African OQ759801.1|East-Central-South-African OQ759806.1|East-Central-South-African OQ759807.1|East-Central-South-African OQ759808.1|East-Central-South-African OQ759809.1|East-Central-South-African OQ759810.1|East-Central-South-African OQ759817.1|East-Central-South-African OQ759820.1|East-Ce…
Hap_416	1	[OQ759803.1|East-Central-South-African]
Hap_417	2	[OQ759805.1|East-Central-South-African OQ759811.1|East-Central-South-African]
Hap_418	2	[OQ759812.1|East-Central-South-African OQ759815.1|East-Central-South-African]
Hap_419	1	[OQ759813.1|East-Central-South-African]
Hap_420	18	[OQ759814.1|East-Central-South-African OQ759854.1|East-Central-South-African OQ759857.1|East-Central-South-African OQ759907.1|East-Central-South-African OQ759929.1|East-Central-South-African OQ759935.1|East-Central-South-African OQ759943.1|East-Central-South-African OQ759955.1|East-Central-South-African OQ759956.1|East-Central-South-African OQ759965.1|East-Central-South-African OQ759966.1|East-Ce…
Hap_421	1	[OQ759821.1|East-Central-South-African]
Hap_422	1	[OQ759826.1|East-Central-South-African]
Hap_423	1	[OQ759827.1|East-Central-South-African]
Hap_424	1	[OQ759828.1|East-Central-South-African]
Hap_425	1	[OQ759831.1|East-Central-South-African]
Hap_426	1	[OQ759833.1|East-Central-South-African]
Hap_427	1	[OQ759846.1|East-Central-South-African]
Hap_428	1	[OQ759847.1|East-Central-South-African]
Hap_429	1	[OQ759856.1|East-Central-South-African]
Hap_430	2	[OQ759863.1|East-Central-South-African OQ759865.1|East-Central-South-African]
Hap_431	1	[OQ759864.1|East-Central-South-African]
Hap_432	1	[OQ759866.1|East-Central-South-African]
Hap_433	3	[OQ759871.1|East-Central-South-African OQ759875.1|East-Central-South-African OQ759876.1|East-Central-South-African]
Hap_434	3	[OQ759872.1|East-Central-South-African OQ759874.1|East-Central-South-African OQ759882.1|East-Central-South-African]
Hap_435	1	[OQ759884.1|East-Central-South-African]
Hap_436	1	[OQ759909.1|East-Central-South-African]
Hap_437	2	[OQ759934.1|East-Central-South-African OQ759946.1|East-Central-South-African]
Hap_438	5	[OQ759936.1|East-Central-South-African OQ759939.1|East-Central-South-African OQ759940.1|East-Central-South-African OQ759942.1|East-Central-South-African OQ759954.1|East-Central-South-African]
Hap_439	1	[OQ759937.1|East-Central-South-African]
Hap_440	1	[OQ759948.1|East-Central-South-African]
Hap_441	1	[OQ759952.1|East-Central-South-African]
Hap_442	1	[OQ759953.1|East-Central-South-African]
Hap_443	1	[OQ759957.1|East-Central-South-African]
Hap_444	1	[OQ759958.1|East-Central-South-African]
Hap_445	1	[OQ759963.1|East-Central-South-African]
Hap_446	1	[OQ759967.1|East-Central-South-African]
Hap_447	1	[OQ759972.1|East-Central-South-African]
Hap_448	19	[OQ759989.1|East-Central-South-African OQ759990.1|East-Central-South-African OQ759991.1|East-Central-South-African OQ759993.1|East-Central-South-African OQ759994.1|East-Central-South-African OQ759995.1|East-Central-South-African OQ759996.1|East-Central-South-African OQ759997.1|East-Central-South-African OQ760000.1|East-Central-South-African OQ760006.1|East-Central-South-African OQ760012.1|East-Ce…
Hap_449	3	[OQ760004.1|East-Central-South-African OQ760009.1|East-Central-South-African OQ760031.1|East-Central-South-African]
Hap_450	1	[OQ760008.1|East-Central-South-African]
Hap_451	1	[OQ760020.1|East-Central-South-African]
Hap_452	1	[OQ760026.1|East-Central-South-African]
Hap_453	3	[OQ760035.1|East-Central-South-African OQ760050.1|East-Central-South-African OQ760067.1|East-Central-South-African]
Hap_454	1	[OQ760036.1|East-Central-South-African]
Hap_455	5	[OQ760039.1|East-Central-South-African OQ760040.1|East-Central-South-African OQ760041.1|East-Central-South-African OQ760056.1|East-Central-South-African OQ760066.1|East-Central-South-African]
Hap_456	1	[OQ760042.1|East-Central-South-African]
Hap_457	3	[OQ760054.1|East-Central-South-African OQ760055.1|East-Central-South-African OQ760065.1|East-Central-South-African]
Hap_458	1	[OQ775433.1|East-Central-South-African]
Hap_459	1	[OQ775438.1|East-Central-South-African]
Hap_460	1	[OQ775442.1|East-Central-South-African]
Hap_461	3	[OQ775454.1|East-Central-South-African OQ775476.1|East-Central-South-African OQ775549.1|East-Central-South-African]
Hap_462	1	[OQ775455.1|East-Central-South-African]
Hap_463	1	[OQ775477.1|East-Central-South-African]
Hap_464	1	[OQ775483.1|East-Central-South-African]
Hap_465	1	[OQ775491.1|East-Central-South-African]
Hap_466	1	[OQ775501.1|East-Central-South-African]
Hap_467	2	[OQ775514.1|East-Central-South-African OQ775516.1|East-Central-South-African]
Hap_468	1	[OQ775517.1|East-Central-South-African]
Hap_469	1	[OQ775528.1|East-Central-South-African]
Hap_470	1	[OQ775538.1|East-Central-South-African]
Hap_471	1	[OR064019.1|East-Central-South-African]
Hap_472	1	[OR167300.1|East-Central-South-African]
Hap_473	1	[OR167318.1|East-Central-South-African]
Hap_474	2	[OR412349.1|East-Central-South-African OR412350.1|East-Central-South-African]
Hap_475	1	[OR470610.1|East-Central-South-African]
Hap_476	1	[OR626603.1|East-Central-South-African]
Hap_477	1	[OR631863.1|East-Central-South-African]
Hap_478	8	[OR631864.1|East-Central-South-African OR631866.1|East-Central-South-African OR631869.1|East-Central-South-African OR631876.1|East-Central-South-African OR631878.1|East-Central-South-African OR631883.1|East-Central-South-African OR631886.1|East-Central-South-African OR631910.1|East-Central-South-African]
Hap_479	15	[OR631865.1|East-Central-South-African OR631867.1|East-Central-South-African OR631874.1|East-Central-South-African OR631877.1|East-Central-South-African OR631884.1|East-Central-South-African OR631887.1|East-Central-South-African OR631889.1|East-Central-South-African OR631890.1|East-Central-South-African OR631891.1|East-Central-South-African OR631892.1|East-Central-South-African OR631893.1|East-Ce…
Hap_480	1	[OR631868.1|East-Central-South-African]
Hap_481	2	[OR631870.1|East-Central-South-African OR631873.1|East-Central-South-African]
Hap_482	1	[OR631872.1|East-Central-South-African]
Hap_483	1	[OR631875.1|East-Central-South-African]
Hap_484	1	[OR631879.1|East-Central-South-African]
Hap_485	2	[OR631880.1|East-Central-South-African OR631881.1|East-Central-South-African]
Hap_486	1	[OR631882.1|East-Central-South-African]
Hap_487	1	[OR631888.1|East-Central-South-African]
Hap_488	3	[OR631911.1|East-Central-South-African OR631912.1|East-Central-South-African OR631913.1|East-Central-South-African]
Hap_489	1	[OR631914.1|East-Central-South-African]
Hap_490	1	[OR631915.1|East-Central-South-African]
Hap_491	1	[OR715104.1|East-Central-South-African]
Hap_492	1	[OR785139.1|Asian]
Hap_493	1	[OZ252700.1|East-Central-South-African]
Hap_494	1	[PP196586.1|West_African]
Hap_495	6	[PP196587.1|West_African PP196588.1|West_African PP196593.1|West_African PP196594.1|West_African PP236743.1|West_African PP236746.1|West_African]
Hap_496	28	[PP196589.1|West_African PP196590.1|West_African PP196591.1|West_African PP196592.1|West_African PP196595.1|West_African PP196596.1|West_African PP196597.1|West_African PP196598.1|West_African PP196599.1|West_African PP196600.1|West_African PP196603.1|West_African PP196604.1|West_African PP196605.1|West_African PP196606.1|West_African PP196607.1|West_African PP196608.1|West_African PP196609.1|Wes…
Hap_497	1	[PP196601.1|West_African]
Hap_498	6	[PP196611.1|West_African PP196612.1|West_African PP196613.1|West_African PP196614.1|West_African PP236755.1|West_African PP236756.1|West_African]
Hap_499	1	[PP236750.1|West_African]
Hap_500	2	[PP336973.1|East-Central-South-African PP336974.1|East-Central-South-African]
Hap_501	1	[PP337002.1|East-Central-South-African]
Hap_502	1	[PP798381.1|Asian]
Hap_503	4	[PP896895.1|East-Central-South-African PP896911.1|East-Central-South-African PP896913.1|East-Central-South-African PP896917.1|East-Central-South-African]
Hap_504	4	[PP896896.1|East-Central-South-African PP896902.1|East-Central-South-African PP896915.1|East-Central-South-African PP896918.1|East-Central-South-African]
Hap_505	1	[PP896898.1|East-Central-South-African]
Hap_506	1	[PP896899.1|East-Central-South-African]
Hap_507	1	[PP896901.1|East-Central-South-African]
Hap_508	1	[PP896903.1|East-Central-South-African]
Hap_509	1	[PP896906.1|East-Central-South-African]
Hap_510	1	[PP896908.1|East-Central-South-African]
Hap_511	1	[PP896909.1|East-Central-South-African]
Hap_512	1	[PP896920.1|East-Central-South-African]
Hap_513	1	[PP896921.1|East-Central-South-African]
Hap_514	1	[PQ483508.1|West_African]
Hap_515	3	[PQ483509.1|West_African PQ483514.1|West_African PQ483515.1|West_African]
Hap_516	3	[PQ483510.1|West_African PQ483512.1|West_African PQ483513.1|West_African]
Hap_517	1	[PQ673601.1|East-Central-South-African]
Hap_518	1	[PV022116.1|East-Central-South-African]
Hap_519	1	[PV022118.1|East-Central-South-African]
Hap_520	1	[PV022119.1|East-Central-South-African]
Hap_521	1	[PV022122.1|East-Central-South-African]
Hap_522	1	[PV022124.1|East-Central-South-African]
Hap_523	1	[PV685568.1|East-Central-South-African]
Hap_524	2	[PV685581.1|East-Central-South-African PV685672.1|East-Central-South-African]
Hap_525	1	[PV685585.1|East-Central-South-African]
Hap_526	1	[PV685587.1|East-Central-South-African]
Hap_527	1	[PV685593.1|East-Central-South-African]
Hap_528	1	[PV685635.1|East-Central-South-African]
Hap_529	2	[PV685670.1|East-Central-South-African PV685671.1|East-Central-South-African]
Hap_530	1	[PV685675.1|East-Central-South-African]
Hap_531	1	[PV685701.1|East-Central-South-African]
Hap_532	1	[PV685703.1|East-Central-South-African]
Hap_533	1	[PV685706.1|East-Central-South-African]
Hap_534	1	[PV805110.1|Asian]
Hap_535	1	[PV879483.1|East-Central-South-African]
Hap_536	1	[PV879487.1|East-Central-South-African]
