# Supplementary material for: Genetic diversity of the chikungunya virus E2 gene and its implications for the efficacy of vaccines and therapeutic antibodies highlights the urgent need for a pan virus vaccine
Source: Research Square preprint supplement (doi:10.21203/rs.3.rs-7628294/v1), 2025-11-24
Supplement: Supplementary file 2 [file ba9b0d8153b474905d50ef93.xlsx]

## Sheet: Table S1
Supplementary File 1: Table S1: Accessions and lineage determination of the studied sequences
Sequence Accession No.	Collection Year	Isolation Country	Host Common Name	Lineage	Sequence Link
AB455493.1	2006	Sri Lanka	Human	East-Central-South-African	https://www.ncbi.nlm.nih.gov/nuccore/AB455493.1
AB455494.1	2006	Sri Lanka	Human	East-Central-South-African	https://www.ncbi.nlm.nih.gov/nuccore/AB455494.1
AB857730.1	2010	Thailand	Human	East-Central-South-African	https://www.ncbi.nlm.nih.gov/nuccore/AB857730.1
AB857733.1	2010	Thailand	Human	East-Central-South-African	https://www.ncbi.nlm.nih.gov/nuccore/AB857733.1
AB857743.1	2010	Thailand	Human	East-Central-South-African	https://www.ncbi.nlm.nih.gov/nuccore/AB857743.1
AB857771.1	2010	Thailand	Human	East-Central-South-African	https://www.ncbi.nlm.nih.gov/nuccore/AB857771.1
AB857778.1	2010	Thailand	Human	East-Central-South-African	https://www.ncbi.nlm.nih.gov/nuccore/AB857778.1
AB857781.1	2010	Thailand	Human	East-Central-South-African	https://www.ncbi.nlm.nih.gov/nuccore/AB857781.1
AB860301.3	2013	Philippines	Human	Asian	https://www.ncbi.nlm.nih.gov/nuccore/AB860301.3
AF339485.1	1953	Tanzania	Human	East-Central-South-African	https://www.ncbi.nlm.nih.gov/nuccore/AF339485.1
AF490259.3	1953	Tanzania	Human	East-Central-South-African	https://www.ncbi.nlm.nih.gov/nuccore/AF490259.3
AM258990.1	2005	Reunion	Human	East-Central-South-African	https://www.ncbi.nlm.nih.gov/nuccore/AM258990.1
AM258991.1	2005	Seychelles	Human	East-Central-South-African	https://www.ncbi.nlm.nih.gov/nuccore/AM258991.1
AM258992.1	2006	Reunion	Human	East-Central-South-African	https://www.ncbi.nlm.nih.gov/nuccore/AM258992.1
AM258993.1	2006	Reunion	Human	East-Central-South-African	https://www.ncbi.nlm.nih.gov/nuccore/AM258993.1
AM258994.1	2006	Reunion	Human	East-Central-South-African	https://www.ncbi.nlm.nih.gov/nuccore/AM258994.1
AM258995.1	2005	Reunion	Human	East-Central-South-African	https://www.ncbi.nlm.nih.gov/nuccore/AM258995.1
AY424803.1	1965	India	Human	Asian	https://www.ncbi.nlm.nih.gov/nuccore/AY424803.1
AY726732.1	1983	Senegal	Mosquito	West African	https://www.ncbi.nlm.nih.gov/nuccore/AY726732.1
DQ443544.2	2006	Reunion	Human	East-Central-South-African	https://www.ncbi.nlm.nih.gov/nuccore/DQ443544.2
EF012359.1	2006	Mauritius	Human	East-Central-South-African	https://www.ncbi.nlm.nih.gov/nuccore/EF012359.1
EF027134.1	2006	India	Human	East-Central-South-African	https://www.ncbi.nlm.nih.gov/nuccore/EF027134.1
EF027135.1	2006	India	Human	East-Central-South-African	https://www.ncbi.nlm.nih.gov/nuccore/EF027135.1
EF027136.1	2006	India	Human	East-Central-South-African	https://www.ncbi.nlm.nih.gov/nuccore/EF027136.1
EF027137.1	2006	India	Human	East-Central-South-African	https://www.ncbi.nlm.nih.gov/nuccore/EF027137.1
EF027138.1	2006	India	Human	East-Central-South-African	https://www.ncbi.nlm.nih.gov/nuccore/EF027138.1
EF027139.1	2000	India	Mosquito	East-Central-South-African	https://www.ncbi.nlm.nih.gov/nuccore/EF027139.1
EF027140.1	1963	India	Human	Asian	https://www.ncbi.nlm.nih.gov/nuccore/EF027140.1
EF027141.1	1973	India	Human	Asian	https://www.ncbi.nlm.nih.gov/nuccore/EF027141.1
EF210157.2	2006	India	Human	East-Central-South-African	https://www.ncbi.nlm.nih.gov/nuccore/EF210157.2
EF452493.1		Thailand	Human	Asian	https://www.ncbi.nlm.nih.gov/nuccore/EF452493.1
EF452494.1		USA	Human	Asian	https://www.ncbi.nlm.nih.gov/nuccore/EF452494.1
EU037962.1	2006	Mauritius	Human	East-Central-South-African	https://www.ncbi.nlm.nih.gov/nuccore/EU037962.1
EU192142.1	2006	Singapore	Human	East-Central-South-African	https://www.ncbi.nlm.nih.gov/nuccore/EU192142.1
EU192143.1	2007	Indonesia	Human	Asian	https://www.ncbi.nlm.nih.gov/nuccore/EU192143.1
EU244823.2	2007	Italy	Human	East-Central-South-African	https://www.ncbi.nlm.nih.gov/nuccore/EU244823.2
EU372006.1	2007	India	Human	East-Central-South-African	https://www.ncbi.nlm.nih.gov/nuccore/EU372006.1
EU564334.1	2006	Mauritius	Human	East-Central-South-African	https://www.ncbi.nlm.nih.gov/nuccore/EU564334.1
EU564335.1	2006	India	Human	East-Central-South-African	https://www.ncbi.nlm.nih.gov/nuccore/EU564335.1
EU703759.1	2006	Malaysia	Human	Asian	https://www.ncbi.nlm.nih.gov/nuccore/EU703759.1
EU703760.1	2006	Malaysia	Human	Asian	https://www.ncbi.nlm.nih.gov/nuccore/EU703760.1
EU703761.1	2006	Malaysia	Human	Asian	https://www.ncbi.nlm.nih.gov/nuccore/EU703761.1
EU703762.1	2006	Malaysia	Human	Asian	https://www.ncbi.nlm.nih.gov/nuccore/EU703762.1
FJ000062.1	2006	India	Human	East-Central-South-African	https://www.ncbi.nlm.nih.gov/nuccore/FJ000062.1
FJ000063.1	2006	India	Human	East-Central-South-African	https://www.ncbi.nlm.nih.gov/nuccore/FJ000063.1
FJ000064.1	2006	India	Human	East-Central-South-African	https://www.ncbi.nlm.nih.gov/nuccore/FJ000064.1
FJ000065.1	2006	India	Human	East-Central-South-African	https://www.ncbi.nlm.nih.gov/nuccore/FJ000065.1
FJ000066.1	2006	India	Human	East-Central-South-African	https://www.ncbi.nlm.nih.gov/nuccore/FJ000066.1
FJ000067.1	2006	India	Human	East-Central-South-African	https://www.ncbi.nlm.nih.gov/nuccore/FJ000067.1
FJ000068.1	2006	India	Human	East-Central-South-African	https://www.ncbi.nlm.nih.gov/nuccore/FJ000068.1
FJ000069.1	2007	India	Human	East-Central-South-African	https://www.ncbi.nlm.nih.gov/nuccore/FJ000069.1
FJ445426.2	2007	Sri Lanka	Human	East-Central-South-African	https://www.ncbi.nlm.nih.gov/nuccore/FJ445426.2
FJ445427.2	2007	Sri Lanka	Human	East-Central-South-African	https://www.ncbi.nlm.nih.gov/nuccore/FJ445427.2
FJ445428.2	2007	Sri Lanka	Human	East-Central-South-African	https://www.ncbi.nlm.nih.gov/nuccore/FJ445428.2
FJ445430.2	2008	Singapore	Human	East-Central-South-African	https://www.ncbi.nlm.nih.gov/nuccore/FJ445430.2
FJ445431.2	2008	Singapore	Human	East-Central-South-African	https://www.ncbi.nlm.nih.gov/nuccore/FJ445431.2
FJ445432.2	2008	Singapore	Human	East-Central-South-African	https://www.ncbi.nlm.nih.gov/nuccore/FJ445432.2
FJ445433.2	2008	Singapore	Human	East-Central-South-African	https://www.ncbi.nlm.nih.gov/nuccore/FJ445433.2
FJ445443.2	2008	Singapore	Human	East-Central-South-African	https://www.ncbi.nlm.nih.gov/nuccore/FJ445443.2
FJ445445.2	2008	Singapore	Human	East-Central-South-African	https://www.ncbi.nlm.nih.gov/nuccore/FJ445445.2
FJ445463.2	2008	Singapore	Human	East-Central-South-African	https://www.ncbi.nlm.nih.gov/nuccore/FJ445463.2
FJ445484.2	2008	Singapore	Human	East-Central-South-African	https://www.ncbi.nlm.nih.gov/nuccore/FJ445484.2
FJ445502.2	2008	Singapore	Human	East-Central-South-African	https://www.ncbi.nlm.nih.gov/nuccore/FJ445502.2
FJ445510.2	2008	Singapore	Human	East-Central-South-African	https://www.ncbi.nlm.nih.gov/nuccore/FJ445510.2
FJ445511.2	2008	Singapore	Human	East-Central-South-African	https://www.ncbi.nlm.nih.gov/nuccore/FJ445511.2
FJ513628.1	2008	Sri Lanka	Human	East-Central-South-African	https://www.ncbi.nlm.nih.gov/nuccore/FJ513628.1
FJ513629.1	2008	Sri Lanka	Human	East-Central-South-African	https://www.ncbi.nlm.nih.gov/nuccore/FJ513629.1
FJ513632.1	2008	Sri Lanka	Human	East-Central-South-African	https://www.ncbi.nlm.nih.gov/nuccore/FJ513632.1
FJ513635.1	2008	Sri Lanka	Human	East-Central-South-African	https://www.ncbi.nlm.nih.gov/nuccore/FJ513635.1
FJ513637.1	2008	Sri Lanka	Human	East-Central-South-African	https://www.ncbi.nlm.nih.gov/nuccore/FJ513637.1
FJ513645.1	2008	Sri Lanka	Human	East-Central-South-African	https://www.ncbi.nlm.nih.gov/nuccore/FJ513645.1
FJ513654.1	2008	Sri Lanka	Human	East-Central-South-African	https://www.ncbi.nlm.nih.gov/nuccore/FJ513654.1
FJ513657.1	2008	Sri Lanka	Human	East-Central-South-African	https://www.ncbi.nlm.nih.gov/nuccore/FJ513657.1
FJ513673.1	2008	Sri Lanka	Human	East-Central-South-African	https://www.ncbi.nlm.nih.gov/nuccore/FJ513673.1
FJ513675.1	2008	Sri Lanka	Human	East-Central-South-African	https://www.ncbi.nlm.nih.gov/nuccore/FJ513675.1
FJ513679.1	2008	Sri Lanka	Human	East-Central-South-African	https://www.ncbi.nlm.nih.gov/nuccore/FJ513679.1
FJ807886.1	2007	Indonesia	Human	Asian	https://www.ncbi.nlm.nih.gov/nuccore/FJ807886.1
FJ807887.1	2007	Indonesia	Human	Asian	https://www.ncbi.nlm.nih.gov/nuccore/FJ807887.1
FJ807888.1	2008	Indonesia	Human	Asian	https://www.ncbi.nlm.nih.gov/nuccore/FJ807888.1
FJ807889.1	2008	Indonesia	Human	Asian	https://www.ncbi.nlm.nih.gov/nuccore/FJ807889.1
FJ807890.1	2008	Indonesia	Human	Asian	https://www.ncbi.nlm.nih.gov/nuccore/FJ807890.1
FJ807891.1	2008	Indonesia	Human	Asian	https://www.ncbi.nlm.nih.gov/nuccore/FJ807891.1
FJ807892.1	2008	Malaysia	Human	East-Central-South-African	https://www.ncbi.nlm.nih.gov/nuccore/FJ807892.1
FJ807893.1	2008	Malaysia	Human	East-Central-South-African	https://www.ncbi.nlm.nih.gov/nuccore/FJ807893.1
FJ807894.1	2008	India	Human	East-Central-South-African	https://www.ncbi.nlm.nih.gov/nuccore/FJ807894.1
FJ807895.1	2009	Malaysia	Human	East-Central-South-African	https://www.ncbi.nlm.nih.gov/nuccore/FJ807895.1
FJ807896.1	2006	Singapore	Human	East-Central-South-African	https://www.ncbi.nlm.nih.gov/nuccore/FJ807896.1
FJ807897.1	2007	Indonesia	Human	Asian	https://www.ncbi.nlm.nih.gov/nuccore/FJ807897.1
FJ807898.1	2008	Bangladesh	Human	East-Central-South-African	https://www.ncbi.nlm.nih.gov/nuccore/FJ807898.1
FJ807899.1	2008	Malaysia	Human	East-Central-South-African	https://www.ncbi.nlm.nih.gov/nuccore/FJ807899.1
FJ959103.1	2006	Mauritius	Human	East-Central-South-African	https://www.ncbi.nlm.nih.gov/nuccore/FJ959103.1
FN295483.3	2006	Malaysia	Human	Asian	https://www.ncbi.nlm.nih.gov/nuccore/FN295483.3
FN295484.2	2006	Malaysia	Human	Asian	https://www.ncbi.nlm.nih.gov/nuccore/FN295484.2
FN295485.3	2008	Malaysia	Human	East-Central-South-African	https://www.ncbi.nlm.nih.gov/nuccore/FN295485.3
FN295487.2	2008	Malaysia	Human	East-Central-South-African	https://www.ncbi.nlm.nih.gov/nuccore/FN295487.2
FR687340.1	2008	Malaysia	Human	East-Central-South-African	https://www.ncbi.nlm.nih.gov/nuccore/FR687340.1
FR687341.1	2008	Malaysia	Human	East-Central-South-African	https://www.ncbi.nlm.nih.gov/nuccore/FR687341.1
FR687342.1	2008	Malaysia	Human	East-Central-South-African	https://www.ncbi.nlm.nih.gov/nuccore/FR687342.1
FR687343.1	2008	Malaysia	Human	East-Central-South-African	https://www.ncbi.nlm.nih.gov/nuccore/FR687343.1
FR687344.1	2009	Malaysia	Human	East-Central-South-African	https://www.ncbi.nlm.nih.gov/nuccore/FR687344.1
FR687345.1	2009	Malaysia	Human	East-Central-South-African	https://www.ncbi.nlm.nih.gov/nuccore/FR687345.1
FR687346.1	2009	Malaysia	Human	East-Central-South-African	https://www.ncbi.nlm.nih.gov/nuccore/FR687346.1
FR687347.1	2009	Malaysia	Human	East-Central-South-African	https://www.ncbi.nlm.nih.gov/nuccore/FR687347.1
FR687348.1	2009	Malaysia	Human	East-Central-South-African	https://www.ncbi.nlm.nih.gov/nuccore/FR687348.1
FR717336.1	2005	France	Human	East-Central-South-African	https://www.ncbi.nlm.nih.gov/nuccore/FR717336.1
FR846304.1	2010	France	Human	East-Central-South-African	https://www.ncbi.nlm.nih.gov/nuccore/FR846304.1
FR846305.1	2010	France	Human	East-Central-South-African	https://www.ncbi.nlm.nih.gov/nuccore/FR846305.1
FR846306.1	2009	France	Human	East-Central-South-African	https://www.ncbi.nlm.nih.gov/nuccore/FR846306.1
FR846307.1	2009	France	Human	Asian	https://www.ncbi.nlm.nih.gov/nuccore/FR846307.1
GQ168719.1	2008	Australia	Human	East-Central-South-African	https://www.ncbi.nlm.nih.gov/nuccore/GQ168719.1
GQ428210.1	2006	India	Human	East-Central-South-African	https://www.ncbi.nlm.nih.gov/nuccore/GQ428210.1
GQ428211.1	2006	India	Human	East-Central-South-African	https://www.ncbi.nlm.nih.gov/nuccore/GQ428211.1
GQ428212.1	2007	India	Human	East-Central-South-African	https://www.ncbi.nlm.nih.gov/nuccore/GQ428212.1
GQ428213.1	2007	India	Human	East-Central-South-African	https://www.ncbi.nlm.nih.gov/nuccore/GQ428213.1
GQ428214.1	2008	India	Human	East-Central-South-African	https://www.ncbi.nlm.nih.gov/nuccore/GQ428214.1
GQ428215.1	2008	India	Human	East-Central-South-African	https://www.ncbi.nlm.nih.gov/nuccore/GQ428215.1
GQ905863.1	2009	Thailand	Human	East-Central-South-African	https://www.ncbi.nlm.nih.gov/nuccore/GQ905863.1
GU013528.2	2008	Sri Lanka	Human	East-Central-South-African	https://www.ncbi.nlm.nih.gov/nuccore/GU013528.2
GU013529.2	2008	Sri Lanka	Human	East-Central-South-African	https://www.ncbi.nlm.nih.gov/nuccore/GU013529.2
GU013530.2	2008	Sri Lanka	Human	East-Central-South-African	https://www.ncbi.nlm.nih.gov/nuccore/GU013530.2
GU189061.1	2006	Sri Lanka	Human	East-Central-South-African	https://www.ncbi.nlm.nih.gov/nuccore/GU189061.1
GU199350.1	2008	China	Human	East-Central-South-African	https://www.ncbi.nlm.nih.gov/nuccore/GU199350.1
GU199351.1	2008	China	Human	East-Central-South-African	https://www.ncbi.nlm.nih.gov/nuccore/GU199351.1
GU199352.1	2008	China	Human	East-Central-South-African	https://www.ncbi.nlm.nih.gov/nuccore/GU199352.1
GU199353.1	2008	China	Human	East-Central-South-African	https://www.ncbi.nlm.nih.gov/nuccore/GU199353.1
GU301779.1	2009	Thailand	Human	East-Central-South-African	https://www.ncbi.nlm.nih.gov/nuccore/GU301779.1
GU301780.1	2008	Thailand	Human	East-Central-South-African	https://www.ncbi.nlm.nih.gov/nuccore/GU301780.1
GU301781.1	2009	Thailand	Human	East-Central-South-African	https://www.ncbi.nlm.nih.gov/nuccore/GU301781.1
GU434101.1	2006	Seychelles	Human	East-Central-South-African	https://www.ncbi.nlm.nih.gov/nuccore/GU434101.1
GU434102.1	2006	Mauritius	Human	East-Central-South-African	https://www.ncbi.nlm.nih.gov/nuccore/GU434102.1
GU434105.1	2006	Mauritius	Human	East-Central-South-African	https://www.ncbi.nlm.nih.gov/nuccore/GU434105.1
GU434106.1	2006	Mauritius	Human	East-Central-South-African	https://www.ncbi.nlm.nih.gov/nuccore/GU434106.1
GU434107.1	2006	India	Human	East-Central-South-African	https://www.ncbi.nlm.nih.gov/nuccore/GU434107.1
GU434108.1	2006	Sri Lanka	Human	East-Central-South-African	https://www.ncbi.nlm.nih.gov/nuccore/GU434108.1
GU434109.1	2006	Seychelles	Human	East-Central-South-African	https://www.ncbi.nlm.nih.gov/nuccore/GU434109.1
GU434110.1	2006	Mauritius	Human	East-Central-South-African	https://www.ncbi.nlm.nih.gov/nuccore/GU434110.1
GU434111.1	2006	Mauritius	Human	East-Central-South-African	https://www.ncbi.nlm.nih.gov/nuccore/GU434111.1
GU434112.1	2006	Mauritius	Human	East-Central-South-African	https://www.ncbi.nlm.nih.gov/nuccore/GU434112.1
GU562826.1	2009	India	Human	East-Central-South-African	https://www.ncbi.nlm.nih.gov/nuccore/GU562826.1
GU562827.1	2009	India	Human	East-Central-South-African	https://www.ncbi.nlm.nih.gov/nuccore/GU562827.1
GU908223.1	2009	Thailand	Mosquito	East-Central-South-African	https://www.ncbi.nlm.nih.gov/nuccore/GU908223.1
HE806461.1	2011	New Caledonia	Human	Asian	https://www.ncbi.nlm.nih.gov/nuccore/HE806461.1
HM038418.1	2009	India	Human	East-Central-South-African	https://www.ncbi.nlm.nih.gov/nuccore/HM038418.1
HM045784.1	1984	Central African Republic	Mosquito	East-Central-South-African	https://www.ncbi.nlm.nih.gov/nuccore/HM045784.1
HM045785.1	1966	Senegal	Mosquito	West African	https://www.ncbi.nlm.nih.gov/nuccore/HM045785.1
HM045786.1	1964	Nigeria	Human	West African	https://www.ncbi.nlm.nih.gov/nuccore/HM045786.1
HM045787.1	1995	Thailand	Human	Asian	https://www.ncbi.nlm.nih.gov/nuccore/HM045787.1
HM045788.1	1973	India	Human	Asian	https://www.ncbi.nlm.nih.gov/nuccore/HM045788.1
HM045789.1	1988	Thailand	Human	Asian	https://www.ncbi.nlm.nih.gov/nuccore/HM045789.1
HM045790.1	1985	Philippines	Human	Asian	https://www.ncbi.nlm.nih.gov/nuccore/HM045790.1
HM045791.1	1983	Indonesia	Human	Asian	https://www.ncbi.nlm.nih.gov/nuccore/HM045791.1
HM045792.1	1956	South Africa	Human	East-Central-South-African	https://www.ncbi.nlm.nih.gov/nuccore/HM045792.1
HM045793.1	1956	Central African Republic		East-Central-South-African	https://www.ncbi.nlm.nih.gov/nuccore/HM045793.1
HM045794.1	2006	USA	Human	East-Central-South-African	https://www.ncbi.nlm.nih.gov/nuccore/HM045794.1
HM045796.1	1995	Thailand	Human	Asian	https://www.ncbi.nlm.nih.gov/nuccore/HM045796.1
HM045797.1	1985	Indonesia	Human	Asian	https://www.ncbi.nlm.nih.gov/nuccore/HM045797.1
HM045798.1	1966	Senegal	Human	West African	https://www.ncbi.nlm.nih.gov/nuccore/HM045798.1
HM045799.1	2007	Sri Lanka	Human	East-Central-South-African	https://www.ncbi.nlm.nih.gov/nuccore/HM045799.1
HM045800.1	1985	Philippines	Human	Asian	https://www.ncbi.nlm.nih.gov/nuccore/HM045800.1
HM045801.1	2007	Sri Lanka	Human	East-Central-South-African	https://www.ncbi.nlm.nih.gov/nuccore/HM045801.1
HM045802.1	1995	Thailand		Asian	https://www.ncbi.nlm.nih.gov/nuccore/HM045802.1
HM045803.1	1963	India	Human	Asian	https://www.ncbi.nlm.nih.gov/nuccore/HM045803.1
HM045804.1	1981	Senegal	Human	West African	https://www.ncbi.nlm.nih.gov/nuccore/HM045804.1
HM045806.1	1986	India	Mosquito	East-Central-South-African	https://www.ncbi.nlm.nih.gov/nuccore/HM045806.1
HM045807.1	1965	Nigeria	Mouse	West African	https://www.ncbi.nlm.nih.gov/nuccore/HM045807.1
HM045808.1	1978	Thailand	Human	Asian	https://www.ncbi.nlm.nih.gov/nuccore/HM045808.1
HM045809.1	1960	Democratic Republic of the Congo	Human	East-Central-South-African	https://www.ncbi.nlm.nih.gov/nuccore/HM045809.1
HM045810.1	1958	Thailand	Human	Asian	https://www.ncbi.nlm.nih.gov/nuccore/HM045810.1
HM045811.1	1953	Tanzania	Human	East-Central-South-African	https://www.ncbi.nlm.nih.gov/nuccore/HM045811.1
HM045812.1	1982	Uganda	Human	East-Central-South-African	https://www.ncbi.nlm.nih.gov/nuccore/HM045812.1
HM045813.1	1963	India	Human	Asian	https://www.ncbi.nlm.nih.gov/nuccore/HM045813.1
HM045814.1	1975	Thailand	Human	Asian	https://www.ncbi.nlm.nih.gov/nuccore/HM045814.1
HM045815.1	1979	Senegal	Mosquito	West African	https://www.ncbi.nlm.nih.gov/nuccore/HM045815.1
HM045816.1	1966	Senegal	Human	West African	https://www.ncbi.nlm.nih.gov/nuccore/HM045816.1
HM045817.1	2005	Senegal	Human	West African	https://www.ncbi.nlm.nih.gov/nuccore/HM045817.1
HM045818.1	1981	Cote d'Ivoire	Mosquito	West African	https://www.ncbi.nlm.nih.gov/nuccore/HM045818.1
HM045819.1	1993	Senegal	Mosquito	West African	https://www.ncbi.nlm.nih.gov/nuccore/HM045819.1
HM045820.1	1993	Cote d'Ivoire	Mosquito	West African	https://www.ncbi.nlm.nih.gov/nuccore/HM045820.1
HM045821.1	1963	Senegal	Mosquito	East-Central-South-African	https://www.ncbi.nlm.nih.gov/nuccore/HM045821.1
HM045822.1	1978	Central African Republic	Human	East-Central-South-African	https://www.ncbi.nlm.nih.gov/nuccore/HM045822.1
HM045823.1	1962	Angola		East-Central-South-African	https://www.ncbi.nlm.nih.gov/nuccore/HM045823.1
HM067743.1	2009	Singapore	Human	East-Central-South-African	https://www.ncbi.nlm.nih.gov/nuccore/HM067743.1
HM067744.1	2009	Thailand	Human	East-Central-South-African	https://www.ncbi.nlm.nih.gov/nuccore/HM067744.1
HM159384.1	2006	India	Human	East-Central-South-African	https://www.ncbi.nlm.nih.gov/nuccore/HM159384.1
HM159385.1	2010	India	Human	East-Central-South-African	https://www.ncbi.nlm.nih.gov/nuccore/HM159385.1
HM159386.1	2010	India	Human	East-Central-South-African	https://www.ncbi.nlm.nih.gov/nuccore/HM159386.1
HM159387.1	2010	India	Human	East-Central-South-African	https://www.ncbi.nlm.nih.gov/nuccore/HM159387.1
HM159388.1	2010	India	Human	East-Central-South-African	https://www.ncbi.nlm.nih.gov/nuccore/HM159388.1
HM159389.1	2010	India	Human	East-Central-South-African	https://www.ncbi.nlm.nih.gov/nuccore/HM159389.1
HM159390.1	2009	India	Human	East-Central-South-African	https://www.ncbi.nlm.nih.gov/nuccore/HM159390.1
HQ456251.1	2005	Comoros	Human	East-Central-South-African	https://www.ncbi.nlm.nih.gov/nuccore/HQ456251.1
HQ456252.1	2005	Comoros	Human	East-Central-South-African	https://www.ncbi.nlm.nih.gov/nuccore/HQ456252.1
HQ456253.1	2005	Comoros	Mosquito	East-Central-South-African	https://www.ncbi.nlm.nih.gov/nuccore/HQ456253.1
HQ456254.1	2004	Kenya	Human	East-Central-South-African	https://www.ncbi.nlm.nih.gov/nuccore/HQ456254.1
HQ456255.1	2004	Kenya	Human	East-Central-South-African	https://www.ncbi.nlm.nih.gov/nuccore/HQ456255.1
HQ529777.1	2008	India	Human	East-Central-South-African	https://www.ncbi.nlm.nih.gov/nuccore/HQ529777.1
HQ529779.1	2009	India	Human	East-Central-South-African	https://www.ncbi.nlm.nih.gov/nuccore/HQ529779.1
HQ846356.1	2010	China	Human	East-Central-South-African	https://www.ncbi.nlm.nih.gov/nuccore/HQ846356.1
HQ846357.1	2010	China	Human	East-Central-South-African	https://www.ncbi.nlm.nih.gov/nuccore/HQ846357.1
HQ846358.1	2010	China	Human	East-Central-South-African	https://www.ncbi.nlm.nih.gov/nuccore/HQ846358.1
HQ846359.1	2010	China	Human	East-Central-South-African	https://www.ncbi.nlm.nih.gov/nuccore/HQ846359.1
HQ848080.1	2008	India	Human	East-Central-South-African	https://www.ncbi.nlm.nih.gov/nuccore/HQ848080.1
HQ848081.1	2009	India	Human	East-Central-South-African	https://www.ncbi.nlm.nih.gov/nuccore/HQ848081.1
JF274082.1	2006	India	Human	East-Central-South-African	https://www.ncbi.nlm.nih.gov/nuccore/JF274082.1
JN558834.1	2009	India	Human	East-Central-South-African	https://www.ncbi.nlm.nih.gov/nuccore/JN558834.1
JN558835.1	2008	India	Human	East-Central-South-African	https://www.ncbi.nlm.nih.gov/nuccore/JN558835.1
JN558836.1	2009	India	Human	East-Central-South-African	https://www.ncbi.nlm.nih.gov/nuccore/JN558836.1
JQ065885.1	2010	China	Human	East-Central-South-African	https://www.ncbi.nlm.nih.gov/nuccore/JQ065885.1
JQ065886.1	2010	China	Human	East-Central-South-African	https://www.ncbi.nlm.nih.gov/nuccore/JQ065886.1
JQ065888.1	2010	China	Human	East-Central-South-African	https://www.ncbi.nlm.nih.gov/nuccore/JQ065888.1
JQ065889.1	2010	China	Human	East-Central-South-African	https://www.ncbi.nlm.nih.gov/nuccore/JQ065889.1
JQ065890.1	2010	China	Human	East-Central-South-African	https://www.ncbi.nlm.nih.gov/nuccore/JQ065890.1
JQ065891.1	2010	China	Human	East-Central-South-African	https://www.ncbi.nlm.nih.gov/nuccore/JQ065891.1
JQ065892.1	2010	China	Human	East-Central-South-African	https://www.ncbi.nlm.nih.gov/nuccore/JQ065892.1
JQ067624.1	2010	China	Human	East-Central-South-African	https://www.ncbi.nlm.nih.gov/nuccore/JQ067624.1
JQ861253.1	2011	Cambodia	Human	East-Central-South-African	https://www.ncbi.nlm.nih.gov/nuccore/JQ861253.1
JQ861254.1	2011	Cambodia	Human	East-Central-South-African	https://www.ncbi.nlm.nih.gov/nuccore/JQ861254.1
JQ861255.1	2011	Cambodia	Human	East-Central-South-African	https://www.ncbi.nlm.nih.gov/nuccore/JQ861255.1
JQ861256.1	2011	Cambodia	Human	East-Central-South-African	https://www.ncbi.nlm.nih.gov/nuccore/JQ861256.1
JQ861257.1	2011	Cambodia	Human	East-Central-South-African	https://www.ncbi.nlm.nih.gov/nuccore/JQ861257.1
JQ861258.1	2011	Cambodia	Human	East-Central-South-African	https://www.ncbi.nlm.nih.gov/nuccore/JQ861258.1
JQ861259.1	2011	Cambodia	Human	East-Central-South-African	https://www.ncbi.nlm.nih.gov/nuccore/JQ861259.1
JQ861260.1	2011	Cambodia	Human	East-Central-South-African	https://www.ncbi.nlm.nih.gov/nuccore/JQ861260.1
JX088705.1	2010	China	Human	East-Central-South-African	https://www.ncbi.nlm.nih.gov/nuccore/JX088705.1
JX276645.1	2006	India	Human	East-Central-South-African	https://www.ncbi.nlm.nih.gov/nuccore/JX276645.1
JX276646.1	2007	India	Human	East-Central-South-African	https://www.ncbi.nlm.nih.gov/nuccore/JX276646.1
JX442959.1	2006	India	Human	East-Central-South-African	https://www.ncbi.nlm.nih.gov/nuccore/JX442959.1
JX442960.1	2007	India	Human	East-Central-South-African	https://www.ncbi.nlm.nih.gov/nuccore/JX442960.1
JX442966.1	2010	India	Human	East-Central-South-African	https://www.ncbi.nlm.nih.gov/nuccore/JX442966.1
JX442967.1	2011	India	Human	East-Central-South-African	https://www.ncbi.nlm.nih.gov/nuccore/JX442967.1
JX442968.1	2011	India	Human	East-Central-South-African	https://www.ncbi.nlm.nih.gov/nuccore/JX442968.1
KC352904.1	2012	Philippines	Human	Asian	https://www.ncbi.nlm.nih.gov/nuccore/KC352904.1
KC488650.1	2012	China	Human	Asian	https://www.ncbi.nlm.nih.gov/nuccore/KC488650.1
KC614648.1	2011	Yemen	Mosquito	East-Central-South-African	https://www.ncbi.nlm.nih.gov/nuccore/KC614648.1
KC862329.1	2010	Indonesia	Human	East-Central-South-African	https://www.ncbi.nlm.nih.gov/nuccore/KC862329.1
KC879559.1	2001	Indonesia	Human	Asian	https://www.ncbi.nlm.nih.gov/nuccore/KC879559.1
KC879560.1	2001	Indonesia	Human	Asian	https://www.ncbi.nlm.nih.gov/nuccore/KC879560.1
KC879562.1	2004	Indonesia	Human	Asian	https://www.ncbi.nlm.nih.gov/nuccore/KC879562.1
KC879565.1	2004	Indonesia	Human	Asian	https://www.ncbi.nlm.nih.gov/nuccore/KC879565.1
KC879568.1	2002	Indonesia	Human	Asian	https://www.ncbi.nlm.nih.gov/nuccore/KC879568.1
KC879570.1	2003	Indonesia	Human	Asian	https://www.ncbi.nlm.nih.gov/nuccore/KC879570.1
KF151174.1	2009	Myanmar	Human	East-Central-South-African	https://www.ncbi.nlm.nih.gov/nuccore/KF151174.1
KF151175.1	2009	Myanmar	Human	East-Central-South-African	https://www.ncbi.nlm.nih.gov/nuccore/KF151175.1
KF283986.1	2005	Comoros	Human	East-Central-South-African	https://www.ncbi.nlm.nih.gov/nuccore/KF283986.1
KF283987.1	2005	Comoros	Human	East-Central-South-African	https://www.ncbi.nlm.nih.gov/nuccore/KF283987.1
KF318729.1	2012	China	Human	Asian	https://www.ncbi.nlm.nih.gov/nuccore/KF318729.1
KF578457.1	2007	Sri Lanka	Human	East-Central-South-African	https://www.ncbi.nlm.nih.gov/nuccore/KF578457.1
KF578458.1	2007	Sri Lanka	Human	East-Central-South-African	https://www.ncbi.nlm.nih.gov/nuccore/KF578458.1
KF578459.1	2007	Sri Lanka	Human	East-Central-South-African	https://www.ncbi.nlm.nih.gov/nuccore/KF578459.1
KF590564.1	2010	Myanmar	Human	East-Central-South-African	https://www.ncbi.nlm.nih.gov/nuccore/KF590564.1
KF590565.1	2010	Myanmar	Human	East-Central-South-African	https://www.ncbi.nlm.nih.gov/nuccore/KF590565.1
KF590566.1	2010	Myanmar	Human	East-Central-South-African	https://www.ncbi.nlm.nih.gov/nuccore/KF590566.1
KF590567.1	2010	Myanmar	Human	East-Central-South-African	https://www.ncbi.nlm.nih.gov/nuccore/KF590567.1
KF818472.1	2012	India	Human	East-Central-South-African	https://www.ncbi.nlm.nih.gov/nuccore/KF818472.1
KF818473.1	2012	India	Human	East-Central-South-African	https://www.ncbi.nlm.nih.gov/nuccore/KF818473.1
KF818474.1	2012	India	Human	East-Central-South-African	https://www.ncbi.nlm.nih.gov/nuccore/KF818474.1
KF818475.1	2011	India	Human	East-Central-South-African	https://www.ncbi.nlm.nih.gov/nuccore/KF818475.1
KF872195.1	2013	Russia	Human	Asian	https://www.ncbi.nlm.nih.gov/nuccore/KF872195.1
KJ451622.1	2013	Micronesia	Human	Asian	https://www.ncbi.nlm.nih.gov/nuccore/KJ451622.1
KJ451623.1	2013	Micronesia	Human	Asian	https://www.ncbi.nlm.nih.gov/nuccore/KJ451623.1
KJ451624.1	2014	British Virgin Islands	Human	Asian	https://www.ncbi.nlm.nih.gov/nuccore/KJ451624.1
KJ579184.1	2013	Thailand	Human	East-Central-South-African	https://www.ncbi.nlm.nih.gov/nuccore/KJ579184.1
KJ579185.1	2013	Thailand	Human	East-Central-South-African	https://www.ncbi.nlm.nih.gov/nuccore/KJ579185.1
KJ579186.1	2013	Thailand	Human	East-Central-South-African	https://www.ncbi.nlm.nih.gov/nuccore/KJ579186.1
KJ679577.1	2011	India	Human	East-Central-South-African	https://www.ncbi.nlm.nih.gov/nuccore/KJ679577.1
KJ679578.1	2011	India	Human	East-Central-South-African	https://www.ncbi.nlm.nih.gov/nuccore/KJ679578.1
KJ689452.1	2013	Micronesia	Mosquito	Asian	https://www.ncbi.nlm.nih.gov/nuccore/KJ689452.1
KJ689453.1	2013	Micronesia	Mosquito	Asian	https://www.ncbi.nlm.nih.gov/nuccore/KJ689453.1
KJ796844.1	2009	India	Human	East-Central-South-African	https://www.ncbi.nlm.nih.gov/nuccore/KJ796844.1
KJ796845.1	2009	India	Human	East-Central-South-African	https://www.ncbi.nlm.nih.gov/nuccore/KJ796845.1
KJ796846.1	2009	India	Human	East-Central-South-African	https://www.ncbi.nlm.nih.gov/nuccore/KJ796846.1
KJ796847.1	2009	Thailand	Human	East-Central-South-African	https://www.ncbi.nlm.nih.gov/nuccore/KJ796847.1
KJ796848.1	2008	Thailand	Human	East-Central-South-African	https://www.ncbi.nlm.nih.gov/nuccore/KJ796848.1
KJ796849.1	2008	Thailand	Human	East-Central-South-African	https://www.ncbi.nlm.nih.gov/nuccore/KJ796849.1
KJ796850.1	2008	Thailand	Human	East-Central-South-African	https://www.ncbi.nlm.nih.gov/nuccore/KJ796850.1
KJ796851.1	2008	Thailand	Human	East-Central-South-African	https://www.ncbi.nlm.nih.gov/nuccore/KJ796851.1
KJ796852.1	2009	Thailand	Human	East-Central-South-African	https://www.ncbi.nlm.nih.gov/nuccore/KJ796852.1
KJ941050.1	2006	USA	Human	East-Central-South-African	https://www.ncbi.nlm.nih.gov/nuccore/KJ941050.1
KM673291.1	2013	Indonesia	Human	Asian	https://www.ncbi.nlm.nih.gov/nuccore/KM673291.1
KM923917.1	2007	Malaysia	Monkey	Asian	https://www.ncbi.nlm.nih.gov/nuccore/KM923917.1
KM923918.1	2007	Malaysia	Monkey	Asian	https://www.ncbi.nlm.nih.gov/nuccore/KM923918.1
KP003807.1	2006	France	Human	East-Central-South-African	https://www.ncbi.nlm.nih.gov/nuccore/KP003807.1
KP003808.1	2006	Madagascar	Human	East-Central-South-African	https://www.ncbi.nlm.nih.gov/nuccore/KP003808.1
KP003809.1	2006	Mayotte	Human	East-Central-South-African	https://www.ncbi.nlm.nih.gov/nuccore/KP003809.1
KP003810.1	2007	Italy	Human	East-Central-South-African	https://www.ncbi.nlm.nih.gov/nuccore/KP003810.1
KP003811.1	2007	Italy	Human	East-Central-South-African	https://www.ncbi.nlm.nih.gov/nuccore/KP003811.1
KP003812.1	2007	Gabon	Human	East-Central-South-African	https://www.ncbi.nlm.nih.gov/nuccore/KP003812.1
KP003813.2	2011	Republic of the Congo	Human	East-Central-South-African	https://www.ncbi.nlm.nih.gov/nuccore/KP003813.2
KP164567.1	2014	Brazil	Human	Asian	https://www.ncbi.nlm.nih.gov/nuccore/KP164567.1
KP164568.1	2014	Brazil	Human	East-Central-South-African	https://www.ncbi.nlm.nih.gov/nuccore/KP164568.1
KP164569.1	2014	Brazil	Human	East-Central-South-African	https://www.ncbi.nlm.nih.gov/nuccore/KP164569.1
KP164570.1	2014	Brazil	Human	East-Central-South-African	https://www.ncbi.nlm.nih.gov/nuccore/KP164570.1
KP164571.1	2014	Brazil	Human	Asian	https://www.ncbi.nlm.nih.gov/nuccore/KP164571.1
KP164572.1	2014	Brazil	Human	Asian	https://www.ncbi.nlm.nih.gov/nuccore/KP164572.1
KP164869.1	2009	Thailand		East-Central-South-African	https://www.ncbi.nlm.nih.gov/nuccore/KP164869.1
KP702297.1	2005	Comoros	Human	East-Central-South-African	https://www.ncbi.nlm.nih.gov/nuccore/KP702297.1
KP851709.1	2014	Mexico	Human	Asian	https://www.ncbi.nlm.nih.gov/nuccore/KP851709.1
KP851710.1	2014	Mexico	Human	Asian	https://www.ncbi.nlm.nih.gov/nuccore/KP851710.1
KR002040.1	2014	Brazil	Human	Asian	https://www.ncbi.nlm.nih.gov/nuccore/KR002040.1
KR046227.1	2014	Trinidad and Tobago	Human	Asian	https://www.ncbi.nlm.nih.gov/nuccore/KR046227.1
KR046228.1	2014	Trinidad and Tobago	Human	Asian	https://www.ncbi.nlm.nih.gov/nuccore/KR046228.1
KR046229.1	2014	Trinidad and Tobago	Human	Asian	https://www.ncbi.nlm.nih.gov/nuccore/KR046229.1
KR046230.1	2014	Trinidad and Tobago	Human	Asian	https://www.ncbi.nlm.nih.gov/nuccore/KR046230.1
KR046231.1	2014	Trinidad and Tobago	Human	Asian	https://www.ncbi.nlm.nih.gov/nuccore/KR046231.1
KR046232.1	2014	Trinidad and Tobago	Human	Asian	https://www.ncbi.nlm.nih.gov/nuccore/KR046232.1
KR046233.1	2014	Trinidad and Tobago	Human	Asian	https://www.ncbi.nlm.nih.gov/nuccore/KR046233.1
KR046234.1	2014	Trinidad and Tobago	Human	Asian	https://www.ncbi.nlm.nih.gov/nuccore/KR046234.1
KR264949.1	2014	Puerto Rico	Human	Asian	https://www.ncbi.nlm.nih.gov/nuccore/KR264949.1
KR264950.1	2014	Puerto Rico	Human	Asian	https://www.ncbi.nlm.nih.gov/nuccore/KR264950.1
KR264951.1	2014	Puerto Rico	Human	Asian	https://www.ncbi.nlm.nih.gov/nuccore/KR264951.1
KR559470.1	2014	Puerto Rico	Human	Asian	https://www.ncbi.nlm.nih.gov/nuccore/KR559470.1
KR559471.1	2014	El Salvador	Human	Asian	https://www.ncbi.nlm.nih.gov/nuccore/KR559471.1
KR559472.1	2014	El Salvador	Human	Asian	https://www.ncbi.nlm.nih.gov/nuccore/KR559472.1
KR559473.1	2015	French Polynesia	Human	Asian	https://www.ncbi.nlm.nih.gov/nuccore/KR559473.1
KR559474.1	2014	Puerto Rico	Human	Asian	https://www.ncbi.nlm.nih.gov/nuccore/KR559474.1
KR559475.1	2014	El Salvador	Human	Asian	https://www.ncbi.nlm.nih.gov/nuccore/KR559475.1
KR559476.1	2014	Haiti	Human	Asian	https://www.ncbi.nlm.nih.gov/nuccore/KR559476.1
KR559477.1	2014	Dominican Republic	Human	Asian	https://www.ncbi.nlm.nih.gov/nuccore/KR559477.1
KR559478.1	2014	Haiti	Human	Asian	https://www.ncbi.nlm.nih.gov/nuccore/KR559478.1
KR559479.1	2014	Dominican Republic	Human	Asian	https://www.ncbi.nlm.nih.gov/nuccore/KR559479.1
KR559481.1	2014	Guatemala	Human	Asian	https://www.ncbi.nlm.nih.gov/nuccore/KR559481.1
KR559482.1	2014	Virgin Islands	Human	Asian	https://www.ncbi.nlm.nih.gov/nuccore/KR559482.1
KR559483.1	2014	Puerto Rico	Human	Asian	https://www.ncbi.nlm.nih.gov/nuccore/KR559483.1
KR559484.1	2014	El Salvador	Human	Asian	https://www.ncbi.nlm.nih.gov/nuccore/KR559484.1
KR559485.1	2014	Virgin Islands	Human	Asian	https://www.ncbi.nlm.nih.gov/nuccore/KR559485.1
KR559486.1	2014	Panama	Human	Asian	https://www.ncbi.nlm.nih.gov/nuccore/KR559486.1
KR559487.1	2014	Honduras	Human	Asian	https://www.ncbi.nlm.nih.gov/nuccore/KR559487.1
KR559488.1	2014	Honduras	Human	Asian	https://www.ncbi.nlm.nih.gov/nuccore/KR559488.1
KR559489.1	2014	Jamaica	Human	Asian	https://www.ncbi.nlm.nih.gov/nuccore/KR559489.1
KR559490.1	2014	Guyana	Human	Asian	https://www.ncbi.nlm.nih.gov/nuccore/KR559490.1
KR559491.1	2014	Colombia	Human	Asian	https://www.ncbi.nlm.nih.gov/nuccore/KR559491.1
KR559492.1	2014	Saint Lucia	Human	Asian	https://www.ncbi.nlm.nih.gov/nuccore/KR559492.1
KR559493.1	2014	American Somoa	Human	Asian	https://www.ncbi.nlm.nih.gov/nuccore/KR559493.1
KR559494.1	2014	Virgin Islands	Human	Asian	https://www.ncbi.nlm.nih.gov/nuccore/KR559494.1
KR559495.1	2014	Puerto Rico	Human	Asian	https://www.ncbi.nlm.nih.gov/nuccore/KR559495.1
KR559496.1	2014	Guyana	Human	Asian	https://www.ncbi.nlm.nih.gov/nuccore/KR559496.1
KR559497.1	2014	St. Barts	Human	Asian	https://www.ncbi.nlm.nih.gov/nuccore/KR559497.1
KT192707.1	2014	Nicaragua	Human	Asian	https://www.ncbi.nlm.nih.gov/nuccore/KT192707.1
KT308159.1	2012	Philippines	Human	Asian	https://www.ncbi.nlm.nih.gov/nuccore/KT308159.1
KT308160.1	2012	Philippines	Human	Asian	https://www.ncbi.nlm.nih.gov/nuccore/KT308160.1
KT308161.1	2012	Philippines	Human	Asian	https://www.ncbi.nlm.nih.gov/nuccore/KT308161.1
KT308162.1	2012	Philippines	Human	Asian	https://www.ncbi.nlm.nih.gov/nuccore/KT308162.1
KT308163.1	2012	Philippines	Human	Asian	https://www.ncbi.nlm.nih.gov/nuccore/KT308163.1
KT324224.1	2008	Malaysia	Human	East-Central-South-African	https://www.ncbi.nlm.nih.gov/nuccore/KT324224.1
KT324225.1	2009	Malaysia	Human	East-Central-South-African	https://www.ncbi.nlm.nih.gov/nuccore/KT324225.1
KT324226.1	2009	Malaysia	Human	East-Central-South-African	https://www.ncbi.nlm.nih.gov/nuccore/KT324226.1
KT324227.1	2009	Malaysia	Human	East-Central-South-African	https://www.ncbi.nlm.nih.gov/nuccore/KT324227.1
KT324228.1	2009	Malaysia	Human	East-Central-South-African	https://www.ncbi.nlm.nih.gov/nuccore/KT324228.1
KT327163.2	2014	Mexico	Human	Asian	https://www.ncbi.nlm.nih.gov/nuccore/KT327163.2
KT327164.1	2014	Mexico	Human	Asian	https://www.ncbi.nlm.nih.gov/nuccore/KT327164.1
KT327165.2	2014	Mexico	Human	Asian	https://www.ncbi.nlm.nih.gov/nuccore/KT327165.2
KT327166.2	2014	Mexico	Human	Asian	https://www.ncbi.nlm.nih.gov/nuccore/KT327166.2
KT336777.1	2009	India	Human	East-Central-South-African	https://www.ncbi.nlm.nih.gov/nuccore/KT336777.1
KT336778.1	2010	India	Human	East-Central-South-African	https://www.ncbi.nlm.nih.gov/nuccore/KT336778.1
KT336779.1	2012	India	Human	East-Central-South-African	https://www.ncbi.nlm.nih.gov/nuccore/KT336779.1
KT336780.1	2012	India	Human	East-Central-South-African	https://www.ncbi.nlm.nih.gov/nuccore/KT336780.1
KT336781.1	2013	India	Human	East-Central-South-African	https://www.ncbi.nlm.nih.gov/nuccore/KT336781.1
KT336782.1	2013	India	Human	East-Central-South-African	https://www.ncbi.nlm.nih.gov/nuccore/KT336782.1
KT336783.1	2012	India	Human	East-Central-South-African	https://www.ncbi.nlm.nih.gov/nuccore/KT336783.1
KT336784.1	2012	India	Human	East-Central-South-African	https://www.ncbi.nlm.nih.gov/nuccore/KT336784.1
KT336786.1	2012	India	Human	East-Central-South-African	https://www.ncbi.nlm.nih.gov/nuccore/KT336786.1
KT336787.1	2012	India	Human	East-Central-South-African	https://www.ncbi.nlm.nih.gov/nuccore/KT336787.1
KT336788.1	2012	India	Human	East-Central-South-African	https://www.ncbi.nlm.nih.gov/nuccore/KT336788.1
KT336789.1	2012	India	Human	East-Central-South-African	https://www.ncbi.nlm.nih.gov/nuccore/KT336789.1
KT336790.1	2012	India	Human	East-Central-South-African	https://www.ncbi.nlm.nih.gov/nuccore/KT336790.1
KT336792.1	2012	India	Human	East-Central-South-African	https://www.ncbi.nlm.nih.gov/nuccore/KT336792.1
KT336793.1	2012	India	Human	East-Central-South-African	https://www.ncbi.nlm.nih.gov/nuccore/KT336793.1
KT336794.1	2013	India	Human	East-Central-South-African	https://www.ncbi.nlm.nih.gov/nuccore/KT336794.1
KT336795.1	2013	India	Human	East-Central-South-African	https://www.ncbi.nlm.nih.gov/nuccore/KT336795.1
KT336796.1	2013	India	Human	East-Central-South-African	https://www.ncbi.nlm.nih.gov/nuccore/KT336796.1
KT336797.1	2013	India	Human	East-Central-South-African	https://www.ncbi.nlm.nih.gov/nuccore/KT336797.1
KT336799.1	2013	India	Human	East-Central-South-African	https://www.ncbi.nlm.nih.gov/nuccore/KT336799.1
KT449801.1	2006	Reunion	Human	East-Central-South-African	https://www.ncbi.nlm.nih.gov/nuccore/KT449801.1
KU295117.1	2015	Mexico	Mosquito	Asian	https://www.ncbi.nlm.nih.gov/nuccore/KU295117.1
KU295118.1	2015	Mexico	Mosquito	Asian	https://www.ncbi.nlm.nih.gov/nuccore/KU295118.1
KU295119.1	2015	Mexico	Human	Asian	https://www.ncbi.nlm.nih.gov/nuccore/KU295119.1
KU295120.1	2015	Mexico	Human	Asian	https://www.ncbi.nlm.nih.gov/nuccore/KU295120.1
KU295121.1	2015	Mexico	Human	Asian	https://www.ncbi.nlm.nih.gov/nuccore/KU295121.1
KU295122.1	2015	Mexico	Human	Asian	https://www.ncbi.nlm.nih.gov/nuccore/KU295122.1
KU295123.1	2015	Mexico	Human	Asian	https://www.ncbi.nlm.nih.gov/nuccore/KU295123.1
KU295124.1	2015	Mexico	Human	Asian	https://www.ncbi.nlm.nih.gov/nuccore/KU295124.1
KU295125.1	2015	Mexico	Human	Asian	https://www.ncbi.nlm.nih.gov/nuccore/KU295125.1
KU295126.1	2015	Mexico	Human	Asian	https://www.ncbi.nlm.nih.gov/nuccore/KU295126.1
KU295127.1	2015	Mexico	Human	Asian	https://www.ncbi.nlm.nih.gov/nuccore/KU295127.1
KU295128.1	2015	Mexico	Human	Asian	https://www.ncbi.nlm.nih.gov/nuccore/KU295128.1
KU295129.1	2015	Mexico	Human	Asian	https://www.ncbi.nlm.nih.gov/nuccore/KU295129.1
KU295130.1	2015	Mexico	Human	Asian	https://www.ncbi.nlm.nih.gov/nuccore/KU295130.1
KU355832.1	2015	Brazil	Human	Asian	https://www.ncbi.nlm.nih.gov/nuccore/KU355832.1
KU561427.1	2009	Indonesia	Human	East-Central-South-African	https://www.ncbi.nlm.nih.gov/nuccore/KU561427.1
KU561429.1	2010	Indonesia	Human	East-Central-South-African	https://www.ncbi.nlm.nih.gov/nuccore/KU561429.1
KU561430.1	2010	Indonesia	Human	East-Central-South-African	https://www.ncbi.nlm.nih.gov/nuccore/KU561430.1
KU561431.1	2010	Indonesia	Human	East-Central-South-African	https://www.ncbi.nlm.nih.gov/nuccore/KU561431.1
KU561432.1	2010	Indonesia	Human	East-Central-South-African	https://www.ncbi.nlm.nih.gov/nuccore/KU561432.1
KU561433.1	2009	Malaysia	Human	East-Central-South-African	https://www.ncbi.nlm.nih.gov/nuccore/KU561433.1
KU561434.1	2009	Thailand	Human	East-Central-South-African	https://www.ncbi.nlm.nih.gov/nuccore/KU561434.1
KU561435.1	2013	Thailand	Human	East-Central-South-African	https://www.ncbi.nlm.nih.gov/nuccore/KU561435.1
KU561436.1	2009	Indonesia	Human	Asian	https://www.ncbi.nlm.nih.gov/nuccore/KU561436.1
KU561437.1	2009	Indonesia	Human	Asian	https://www.ncbi.nlm.nih.gov/nuccore/KU561437.1
KU561438.1	2009	Indonesia	Human	Asian	https://www.ncbi.nlm.nih.gov/nuccore/KU561438.1
KU561439.1	2010	Indonesia	Human	Asian	https://www.ncbi.nlm.nih.gov/nuccore/KU561439.1
KU561440.1	2010	Indonesia	Human	Asian	https://www.ncbi.nlm.nih.gov/nuccore/KU561440.1
KU561441.1	2010	Indonesia	Human	Asian	https://www.ncbi.nlm.nih.gov/nuccore/KU561441.1
KU561442.1	2010	Indonesia	Human	Asian	https://www.ncbi.nlm.nih.gov/nuccore/KU561442.1
KU561443.1	2010	Indonesia	Human	Asian	https://www.ncbi.nlm.nih.gov/nuccore/KU561443.1
KU561444.1	2012	Indonesia	Human	Asian	https://www.ncbi.nlm.nih.gov/nuccore/KU561444.1
KU561445.1	2013	Indonesia	Human	Asian	https://www.ncbi.nlm.nih.gov/nuccore/KU561445.1
KU561446.1	2013	Indonesia	Human	Asian	https://www.ncbi.nlm.nih.gov/nuccore/KU561446.1
KU561447.1	2013	Indonesia	Human	Asian	https://www.ncbi.nlm.nih.gov/nuccore/KU561447.1
KU561448.1	2013	Indonesia	Human	Asian	https://www.ncbi.nlm.nih.gov/nuccore/KU561448.1
KU561449.1	2013	Indonesia	Human	Asian	https://www.ncbi.nlm.nih.gov/nuccore/KU561449.1
KU561450.1	2013	Indonesia	Human	Asian	https://www.ncbi.nlm.nih.gov/nuccore/KU561450.1
KU561451.1	2013	Indonesia	Human	Asian	https://www.ncbi.nlm.nih.gov/nuccore/KU561451.1
KU561452.1	2013	Indonesia	Human	Asian	https://www.ncbi.nlm.nih.gov/nuccore/KU561452.1
KU561453.1	2013	Indonesia	Human	Asian	https://www.ncbi.nlm.nih.gov/nuccore/KU561453.1
KU561454.1	2014	Indonesia	Human	Asian	https://www.ncbi.nlm.nih.gov/nuccore/KU561454.1
KU561455.1	2014	Indonesia	Human	Asian	https://www.ncbi.nlm.nih.gov/nuccore/KU561455.1
KU561456.1	2014	Indonesia	Human	Asian	https://www.ncbi.nlm.nih.gov/nuccore/KU561456.1
KU561457.1	2014	Indonesia	Human	Asian	https://www.ncbi.nlm.nih.gov/nuccore/KU561457.1
KU561458.1	2014	Indonesia	Human	Asian	https://www.ncbi.nlm.nih.gov/nuccore/KU561458.1
KU561459.1	2011	Philippines	Human	Asian	https://www.ncbi.nlm.nih.gov/nuccore/KU561459.1
KU561460.1	2013	Philippines	Human	Asian	https://www.ncbi.nlm.nih.gov/nuccore/KU561460.1
KU561461.1	2013	Philippines	Human	Asian	https://www.ncbi.nlm.nih.gov/nuccore/KU561461.1
KU561462.1	2013	Philippines	Human	Asian	https://www.ncbi.nlm.nih.gov/nuccore/KU561462.1
KU561463.1	2013	Philippines	Human	Asian	https://www.ncbi.nlm.nih.gov/nuccore/KU561463.1
KU561464.1	2013	Philippines	Human	Asian	https://www.ncbi.nlm.nih.gov/nuccore/KU561464.1
KU561465.1	2014	Philippines	Human	Asian	https://www.ncbi.nlm.nih.gov/nuccore/KU561465.1
KU561466.1	2013	Singapore	Human	Asian	https://www.ncbi.nlm.nih.gov/nuccore/KU561466.1
KU940225.1	2015	Brazil	Human	East-Central-South-African	https://www.ncbi.nlm.nih.gov/nuccore/KU940225.1
KX009167.1	2013	Thailand	Human	East-Central-South-African	https://www.ncbi.nlm.nih.gov/nuccore/KX009167.1
KX009168.1	2013	Thailand	Human	East-Central-South-African	https://www.ncbi.nlm.nih.gov/nuccore/KX009168.1
KX009169.1	2013	Thailand	Human	East-Central-South-African	https://www.ncbi.nlm.nih.gov/nuccore/KX009169.1
KX009170.1	2013	Thailand	Human	East-Central-South-African	https://www.ncbi.nlm.nih.gov/nuccore/KX009170.1
KX009171.1	2013	Thailand	Human	East-Central-South-African	https://www.ncbi.nlm.nih.gov/nuccore/KX009171.1
KX097982.1	2015	Indonesia	Human	Asian	https://www.ncbi.nlm.nih.gov/nuccore/KX097982.1
KX097986.1	2015	Indonesia	Human	Asian	https://www.ncbi.nlm.nih.gov/nuccore/KX097986.1
KX097988.1	2015	Indonesia	Human	Asian	https://www.ncbi.nlm.nih.gov/nuccore/KX097988.1
KX168429.1	2009	Malaysia	Human	Asian	https://www.ncbi.nlm.nih.gov/nuccore/KX168429.1
KX228391.1	2016	Brazil	Human	East-Central-South-African	https://www.ncbi.nlm.nih.gov/nuccore/KX228391.1
KX262986.1	1983	Senegal	Mosquito	West African	https://www.ncbi.nlm.nih.gov/nuccore/KX262986.1
KX262987.1	1996	Thailand	Human	Asian	https://www.ncbi.nlm.nih.gov/nuccore/KX262987.1
KX262988.1	1988	Thailand	Human	Asian	https://www.ncbi.nlm.nih.gov/nuccore/KX262988.1
KX262989.1	2007	Italy	Human	East-Central-South-African	https://www.ncbi.nlm.nih.gov/nuccore/KX262989.1
KX262990.1	1959			East-Central-South-African	https://www.ncbi.nlm.nih.gov/nuccore/KX262990.1
KX262991.1	2013	Saint Martin	Human	Asian	https://www.ncbi.nlm.nih.gov/nuccore/KX262991.1
KX262992.1	2014	Guadeloupe	Human	Asian	https://www.ncbi.nlm.nih.gov/nuccore/KX262992.1
KX262993.1	2007	Italy	Human	East-Central-South-African	https://www.ncbi.nlm.nih.gov/nuccore/KX262993.1
KX262994.1	2014	French Guiana	Human	Asian	https://www.ncbi.nlm.nih.gov/nuccore/KX262994.1
KX262995.1	1983	Senegal	Mosquito	West African	https://www.ncbi.nlm.nih.gov/nuccore/KX262995.1
KX262996.1	2006	Cameroon	Human	East-Central-South-African	https://www.ncbi.nlm.nih.gov/nuccore/KX262996.1
KX262997.1	2009	Malaysia	Human	East-Central-South-African	https://www.ncbi.nlm.nih.gov/nuccore/KX262997.1
KX496989.1	2016	Colombia	Human	Asian	https://www.ncbi.nlm.nih.gov/nuccore/KX496989.1
KX619422.1	2014	India	Human	East-Central-South-African	https://www.ncbi.nlm.nih.gov/nuccore/KX619422.1
KX619423.1	2014	India	Human	East-Central-South-African	https://www.ncbi.nlm.nih.gov/nuccore/KX619423.1
KX619424.1	2015	India	Human	East-Central-South-African	https://www.ncbi.nlm.nih.gov/nuccore/KX619424.1
KX619425.1	2015	India	Human	East-Central-South-African	https://www.ncbi.nlm.nih.gov/nuccore/KX619425.1
KX619426.1	2015	India	Human	East-Central-South-African	https://www.ncbi.nlm.nih.gov/nuccore/KX619426.1
KX702401.1	2014	Haiti	Human	Asian	https://www.ncbi.nlm.nih.gov/nuccore/KX702401.1
KX702402.1	2014	Haiti	Human	Asian	https://www.ncbi.nlm.nih.gov/nuccore/KX702402.1
KX881784.1		India	Human	East-Central-South-African	https://www.ncbi.nlm.nih.gov/nuccore/KX881784.1
KY038946.1	1975	Central African Republic	Mosquito	East-Central-South-African	https://www.ncbi.nlm.nih.gov/nuccore/KY038946.1
KY038947.2	1983	Central African Republic	Human	East-Central-South-African	https://www.ncbi.nlm.nih.gov/nuccore/KY038947.2
KY055011.1	2016	Brazil	Mosquito	East-Central-South-African	https://www.ncbi.nlm.nih.gov/nuccore/KY055011.1
KY057363.1	2016	India	Human	East-Central-South-African	https://www.ncbi.nlm.nih.gov/nuccore/KY057363.1
KY124328.1	2016	Brazil	Human	East-Central-South-African	https://www.ncbi.nlm.nih.gov/nuccore/KY124328.1
KY124329.1	2016	Brazil	Human	East-Central-South-African	https://www.ncbi.nlm.nih.gov/nuccore/KY124329.1
KY272961.1	2014	Dominican Republic	Human	Asian	https://www.ncbi.nlm.nih.gov/nuccore/KY272961.1
KY272962.1	2014	Dominican Republic	Human	Asian	https://www.ncbi.nlm.nih.gov/nuccore/KY272962.1
KY272963.1	2014	Dominican Republic	Human	Asian	https://www.ncbi.nlm.nih.gov/nuccore/KY272963.1
KY272964.1	2014	Dominican Republic	Human	Asian	https://www.ncbi.nlm.nih.gov/nuccore/KY272964.1
KY272965.1	2014	Dominican Republic	Human	Asian	https://www.ncbi.nlm.nih.gov/nuccore/KY272965.1
KY272966.1	2014	Dominican Republic	Human	Asian	https://www.ncbi.nlm.nih.gov/nuccore/KY272966.1
KY272967.1	2014	Dominican Republic	Human	Asian	https://www.ncbi.nlm.nih.gov/nuccore/KY272967.1
KY272969.1	2014	Dominican Republic	Human	Asian	https://www.ncbi.nlm.nih.gov/nuccore/KY272969.1
KY272970.1	2014	Dominican Republic	Human	Asian	https://www.ncbi.nlm.nih.gov/nuccore/KY272970.1
KY435454.1	2011	Trinidad and Tobago	Human	Asian	https://www.ncbi.nlm.nih.gov/nuccore/KY435454.1
KY435455.1	2014	Anguilla	Human	Asian	https://www.ncbi.nlm.nih.gov/nuccore/KY435455.1
KY435456.1	2014	Suriname	Human	Asian	https://www.ncbi.nlm.nih.gov/nuccore/KY435456.1
KY435457.1	2014	Montserrat	Human	Asian	https://www.ncbi.nlm.nih.gov/nuccore/KY435457.1
KY435458.1	2014	Guyana	Human	Asian	https://www.ncbi.nlm.nih.gov/nuccore/KY435458.1
KY435459.1	2014	Cayman Islands	Human	Asian	https://www.ncbi.nlm.nih.gov/nuccore/KY435459.1
KY435460.1	2014	Cayman Islands	Human	Asian	https://www.ncbi.nlm.nih.gov/nuccore/KY435460.1
KY435461.1	2014	Jamaica	Human	Asian	https://www.ncbi.nlm.nih.gov/nuccore/KY435461.1
KY435462.1	2014	Jamaica	Human	Asian	https://www.ncbi.nlm.nih.gov/nuccore/KY435462.1
KY435463.1	2014	Suriname	Human	Asian	https://www.ncbi.nlm.nih.gov/nuccore/KY435463.1
KY435464.1	2014	Barbados	Human	Asian	https://www.ncbi.nlm.nih.gov/nuccore/KY435464.1
KY435465.1	2014	Trinidad and Tobago	Human	Asian	https://www.ncbi.nlm.nih.gov/nuccore/KY435465.1
KY435466.1	2014	Barbados	Human	Asian	https://www.ncbi.nlm.nih.gov/nuccore/KY435466.1
KY435467.1	2014	Montserrat	Human	Asian	https://www.ncbi.nlm.nih.gov/nuccore/KY435467.1
KY435468.1	2014	Jamaica	Human	Asian	https://www.ncbi.nlm.nih.gov/nuccore/KY435468.1
KY435469.1	2014	Grenada	Human	Asian	https://www.ncbi.nlm.nih.gov/nuccore/KY435469.1
KY435470.1	2014	Bahamas	Human	Asian	https://www.ncbi.nlm.nih.gov/nuccore/KY435470.1
KY435471.1	2014	Turks and Caicos Islands	Human	Asian	https://www.ncbi.nlm.nih.gov/nuccore/KY435471.1
KY435472.1	2014	Grenada	Human	Asian	https://www.ncbi.nlm.nih.gov/nuccore/KY435472.1
KY435473.1	2014	Saint Lucia	Human	Asian	https://www.ncbi.nlm.nih.gov/nuccore/KY435473.1
KY435474.1	2014	Saint Lucia	Human	Asian	https://www.ncbi.nlm.nih.gov/nuccore/KY435474.1
KY435475.1	2014	Saint Vincent and the Grenadines	Human	Asian	https://www.ncbi.nlm.nih.gov/nuccore/KY435475.1
KY435476.1	2014	Turks and Caicos Islands	Human	Asian	https://www.ncbi.nlm.nih.gov/nuccore/KY435476.1
KY435477.1	2014	Guyana	Human	Asian	https://www.ncbi.nlm.nih.gov/nuccore/KY435477.1
KY435478.1	2014	Guyana	Human	Asian	https://www.ncbi.nlm.nih.gov/nuccore/KY435478.1
KY435479.1	2014	Antigua and Barbuda	Human	Asian	https://www.ncbi.nlm.nih.gov/nuccore/KY435479.1
KY435480.1	2014	Haiti	Human	Asian	https://www.ncbi.nlm.nih.gov/nuccore/KY435480.1
KY435481.1	2014	Saint Lucia	Human	Asian	https://www.ncbi.nlm.nih.gov/nuccore/KY435481.1
KY435482.1	2014	Saint Kitts and Nevis	Human	Asian	https://www.ncbi.nlm.nih.gov/nuccore/KY435482.1
KY435483.1	2014	Anguilla	Human	Asian	https://www.ncbi.nlm.nih.gov/nuccore/KY435483.1
KY435484.1	2014	Dominica	Human	Asian	https://www.ncbi.nlm.nih.gov/nuccore/KY435484.1
KY435485.1	2014	Dominica	Human	Asian	https://www.ncbi.nlm.nih.gov/nuccore/KY435485.1
KY435486.1	2014	British Virgin Islands	Human	Asian	https://www.ncbi.nlm.nih.gov/nuccore/KY435486.1
KY575565.1	2014	USA	Human	Asian	https://www.ncbi.nlm.nih.gov/nuccore/KY575565.1
KY575566.1	2014	USA	Human	Asian	https://www.ncbi.nlm.nih.gov/nuccore/KY575566.1
KY575567.1	2006	USA	Human	East-Central-South-African	https://www.ncbi.nlm.nih.gov/nuccore/KY575567.1
KY575568.1	2006	USA	Human	East-Central-South-African	https://www.ncbi.nlm.nih.gov/nuccore/KY575568.1
KY575569.1	2014	USA	Human	Asian	https://www.ncbi.nlm.nih.gov/nuccore/KY575569.1
KY575570.1	2008	USA	Human	East-Central-South-African	https://www.ncbi.nlm.nih.gov/nuccore/KY575570.1
KY575571.1	2006	USA	Human	East-Central-South-African	https://www.ncbi.nlm.nih.gov/nuccore/KY575571.1
KY575572.1	2014	USA	Human	Asian	https://www.ncbi.nlm.nih.gov/nuccore/KY575572.1
KY575573.1	2014	USA	Human	Asian	https://www.ncbi.nlm.nih.gov/nuccore/KY575573.1
KY575574.1	1995	USA	Human	East-Central-South-African	https://www.ncbi.nlm.nih.gov/nuccore/KY575574.1
KY680347.1	2014	USA	Human	Asian	https://www.ncbi.nlm.nih.gov/nuccore/KY680347.1
KY680348.1	2014	USA	Human	Asian	https://www.ncbi.nlm.nih.gov/nuccore/KY680348.1
KY680349.1	2014	USA	Human	Asian	https://www.ncbi.nlm.nih.gov/nuccore/KY680349.1
KY680350.1	2014	USA	Human	Asian	https://www.ncbi.nlm.nih.gov/nuccore/KY680350.1
KY680351.1	2014	USA	Human	Asian	https://www.ncbi.nlm.nih.gov/nuccore/KY680351.1
KY680352.1	2014	USA	Human	Asian	https://www.ncbi.nlm.nih.gov/nuccore/KY680352.1
KY680353.1	2014	USA	Human	Asian	https://www.ncbi.nlm.nih.gov/nuccore/KY680353.1
KY680354.1	2014	USA	Human	Asian	https://www.ncbi.nlm.nih.gov/nuccore/KY680354.1
KY680355.1	2014	USA	Human	Asian	https://www.ncbi.nlm.nih.gov/nuccore/KY680355.1
KY680356.1	2014	USA	Human	Asian	https://www.ncbi.nlm.nih.gov/nuccore/KY680356.1
KY680357.1	2014	USA	Human	Asian	https://www.ncbi.nlm.nih.gov/nuccore/KY680357.1
KY680358.1	2014	USA	Human	Asian	https://www.ncbi.nlm.nih.gov/nuccore/KY680358.1
KY680359.1	2014	USA	Human	Asian	https://www.ncbi.nlm.nih.gov/nuccore/KY680359.1
KY680360.1	2014	USA	Human	Asian	https://www.ncbi.nlm.nih.gov/nuccore/KY680360.1
KY680361.1	2014	USA	Human	Asian	https://www.ncbi.nlm.nih.gov/nuccore/KY680361.1
KY680362.1	2014	USA	Human	Asian	https://www.ncbi.nlm.nih.gov/nuccore/KY680362.1
KY680363.1	2014	USA	Human	Asian	https://www.ncbi.nlm.nih.gov/nuccore/KY680363.1
KY680364.1	2014	USA	Human	Asian	https://www.ncbi.nlm.nih.gov/nuccore/KY680364.1
KY680366.1	2015	USA	Human	Asian	https://www.ncbi.nlm.nih.gov/nuccore/KY680366.1
KY680367.1	2014	USA	Human	Asian	https://www.ncbi.nlm.nih.gov/nuccore/KY680367.1
KY680368.1	2014	USA	Human	Asian	https://www.ncbi.nlm.nih.gov/nuccore/KY680368.1
KY680369.1	2014	USA	Human	Asian	https://www.ncbi.nlm.nih.gov/nuccore/KY680369.1
KY680370.1	2014	USA	Human	Asian	https://www.ncbi.nlm.nih.gov/nuccore/KY680370.1
KY680371.1	2014	USA	Human	Asian	https://www.ncbi.nlm.nih.gov/nuccore/KY680371.1
KY680372.1	2014	USA	Human	Asian	https://www.ncbi.nlm.nih.gov/nuccore/KY680372.1
KY680373.1	2014	USA	Human	Asian	https://www.ncbi.nlm.nih.gov/nuccore/KY680373.1
KY680374.1	2014	USA	Human	Asian	https://www.ncbi.nlm.nih.gov/nuccore/KY680374.1
KY680375.1	2014	USA	Human	Asian	https://www.ncbi.nlm.nih.gov/nuccore/KY680375.1
KY680376.1	2014	USA	Human	Asian	https://www.ncbi.nlm.nih.gov/nuccore/KY680376.1
KY680377.1	2014	USA	Human	Asian	https://www.ncbi.nlm.nih.gov/nuccore/KY680377.1
KY680378.1	2014	USA	Human	Asian	https://www.ncbi.nlm.nih.gov/nuccore/KY680378.1
KY680379.1	2014	USA	Human	Asian	https://www.ncbi.nlm.nih.gov/nuccore/KY680379.1
KY680380.1	2014	USA	Human	Asian	https://www.ncbi.nlm.nih.gov/nuccore/KY680380.1
KY680381.1	2014	USA	Human	Asian	https://www.ncbi.nlm.nih.gov/nuccore/KY680381.1
KY680382.1	2014	USA	Human	Asian	https://www.ncbi.nlm.nih.gov/nuccore/KY680382.1
KY680383.1	2014	USA	Human	Asian	https://www.ncbi.nlm.nih.gov/nuccore/KY680383.1
KY680384.1	2014	USA	Human	Asian	https://www.ncbi.nlm.nih.gov/nuccore/KY680384.1
KY680385.1	2014	USA	Human	Asian	https://www.ncbi.nlm.nih.gov/nuccore/KY680385.1
KY680386.1	2014	USA	Human	Asian	https://www.ncbi.nlm.nih.gov/nuccore/KY680386.1
KY680387.1	2014	USA	Human	Asian	https://www.ncbi.nlm.nih.gov/nuccore/KY680387.1
KY680388.1	2014	USA	Human	Asian	https://www.ncbi.nlm.nih.gov/nuccore/KY680388.1
KY680389.1	2015	USA	Human	Asian	https://www.ncbi.nlm.nih.gov/nuccore/KY680389.1
KY680390.1	2014	USA	Human	Asian	https://www.ncbi.nlm.nih.gov/nuccore/KY680390.1
KY680391.1	2014	USA	Human	Asian	https://www.ncbi.nlm.nih.gov/nuccore/KY680391.1
KY680392.1	2014	USA	Human	Asian	https://www.ncbi.nlm.nih.gov/nuccore/KY680392.1
KY680393.1	2014	USA	Human	Asian	https://www.ncbi.nlm.nih.gov/nuccore/KY680393.1
KY680394.1	2014	USA	Human	Asian	https://www.ncbi.nlm.nih.gov/nuccore/KY680394.1
KY680395.1	2014	USA	Human	Asian	https://www.ncbi.nlm.nih.gov/nuccore/KY680395.1
KY680396.1	2014	USA	Human	Asian	https://www.ncbi.nlm.nih.gov/nuccore/KY680396.1
KY680397.1	2014	USA	Human	Asian	https://www.ncbi.nlm.nih.gov/nuccore/KY680397.1
KY680398.1	2014	USA	Human	Asian	https://www.ncbi.nlm.nih.gov/nuccore/KY680398.1
KY680399.1	2014	USA	Human	Asian	https://www.ncbi.nlm.nih.gov/nuccore/KY680399.1
KY680400.1	2014	USA	Human	Asian	https://www.ncbi.nlm.nih.gov/nuccore/KY680400.1
KY680401.1	2014	USA	Human	Asian	https://www.ncbi.nlm.nih.gov/nuccore/KY680401.1
KY680402.1	2014	USA	Human	Asian	https://www.ncbi.nlm.nih.gov/nuccore/KY680402.1
KY680403.1	2014	USA	Human	Asian	https://www.ncbi.nlm.nih.gov/nuccore/KY680403.1
KY680404.1	2014	USA	Human	Asian	https://www.ncbi.nlm.nih.gov/nuccore/KY680404.1
KY680405.1	2014	USA	Human	Asian	https://www.ncbi.nlm.nih.gov/nuccore/KY680405.1
KY680406.1	2014	USA	Human	Asian	https://www.ncbi.nlm.nih.gov/nuccore/KY680406.1
KY680407.1	2014	USA	Human	Asian	https://www.ncbi.nlm.nih.gov/nuccore/KY680407.1
KY680408.1	2014	USA	Human	Asian	https://www.ncbi.nlm.nih.gov/nuccore/KY680408.1
KY680409.1	2014	USA	Human	Asian	https://www.ncbi.nlm.nih.gov/nuccore/KY680409.1
KY680410.1	2014	USA	Human	Asian	https://www.ncbi.nlm.nih.gov/nuccore/KY680410.1
KY680411.1	2014	USA	Human	Asian	https://www.ncbi.nlm.nih.gov/nuccore/KY680411.1
KY680412.1	2014	USA	Human	Asian	https://www.ncbi.nlm.nih.gov/nuccore/KY680412.1
KY680413.1	2014	USA	Human	Asian	https://www.ncbi.nlm.nih.gov/nuccore/KY680413.1
KY680414.1	2014	USA	Human	Asian	https://www.ncbi.nlm.nih.gov/nuccore/KY680414.1
KY703888.1	2015	Nicaragua	Human	Asian	https://www.ncbi.nlm.nih.gov/nuccore/KY703888.1
KY703889.1	2015	Nicaragua	Human	Asian	https://www.ncbi.nlm.nih.gov/nuccore/KY703889.1
KY703890.1	2015	Nicaragua	Human	Asian	https://www.ncbi.nlm.nih.gov/nuccore/KY703890.1
KY703891.1	2015	Nicaragua	Human	Asian	https://www.ncbi.nlm.nih.gov/nuccore/KY703891.1
KY703892.1	2015	Nicaragua	Human	Asian	https://www.ncbi.nlm.nih.gov/nuccore/KY703892.1
KY703893.1	2015	Nicaragua	Human	Asian	https://www.ncbi.nlm.nih.gov/nuccore/KY703893.1
KY703894.1	2015	Nicaragua	Human	Asian	https://www.ncbi.nlm.nih.gov/nuccore/KY703894.1
KY703895.1	2015	Nicaragua	Human	Asian	https://www.ncbi.nlm.nih.gov/nuccore/KY703895.1
KY703896.1	2014	Nicaragua	Human	Asian	https://www.ncbi.nlm.nih.gov/nuccore/KY703896.1
KY703897.1	2015	Nicaragua	Human	Asian	https://www.ncbi.nlm.nih.gov/nuccore/KY703897.1
KY703898.1	2015	Nicaragua	Human	Asian	https://www.ncbi.nlm.nih.gov/nuccore/KY703898.1
KY703899.1	2015	Nicaragua	Human	Asian	https://www.ncbi.nlm.nih.gov/nuccore/KY703899.1
KY703900.1	2015	Nicaragua	Human	Asian	https://www.ncbi.nlm.nih.gov/nuccore/KY703900.1
KY703901.1	2015	Nicaragua	Human	Asian	https://www.ncbi.nlm.nih.gov/nuccore/KY703901.1
KY703902.1	2015	Nicaragua	Human	Asian	https://www.ncbi.nlm.nih.gov/nuccore/KY703902.1
KY703903.1	2015	Nicaragua	Human	Asian	https://www.ncbi.nlm.nih.gov/nuccore/KY703903.1
KY703904.1	2014	Nicaragua	Human	Asian	https://www.ncbi.nlm.nih.gov/nuccore/KY703904.1
KY703905.1	2015	Nicaragua	Human	Asian	https://www.ncbi.nlm.nih.gov/nuccore/KY703905.1
KY703906.1	2015	Nicaragua	Human	Asian	https://www.ncbi.nlm.nih.gov/nuccore/KY703906.1
KY703907.1	2015	Nicaragua	Human	Asian	https://www.ncbi.nlm.nih.gov/nuccore/KY703907.1
KY703908.1	2014	Nicaragua	Human	Asian	https://www.ncbi.nlm.nih.gov/nuccore/KY703908.1
KY703909.1	2015	Nicaragua	Human	Asian	https://www.ncbi.nlm.nih.gov/nuccore/KY703909.1
KY703910.1	2015	Nicaragua	Human	Asian	https://www.ncbi.nlm.nih.gov/nuccore/KY703910.1
KY703911.1	2015	Nicaragua	Human	Asian	https://www.ncbi.nlm.nih.gov/nuccore/KY703911.1
KY703913.1	2015	Nicaragua	Human	Asian	https://www.ncbi.nlm.nih.gov/nuccore/KY703913.1
KY703914.1	2015	Nicaragua	Human	Asian	https://www.ncbi.nlm.nih.gov/nuccore/KY703914.1
KY703915.1	2015	Nicaragua	Human	Asian	https://www.ncbi.nlm.nih.gov/nuccore/KY703915.1
KY703916.1	2015	Nicaragua	Human	Asian	https://www.ncbi.nlm.nih.gov/nuccore/KY703916.1
KY703917.1	2016	Nicaragua	Human	Asian	https://www.ncbi.nlm.nih.gov/nuccore/KY703917.1
KY703918.1	2015	Nicaragua	Human	Asian	https://www.ncbi.nlm.nih.gov/nuccore/KY703918.1
KY703919.1	2015	Nicaragua	Human	Asian	https://www.ncbi.nlm.nih.gov/nuccore/KY703919.1
KY703920.1	2015	Nicaragua	Human	Asian	https://www.ncbi.nlm.nih.gov/nuccore/KY703920.1
KY703921.1	2015	Nicaragua	Human	Asian	https://www.ncbi.nlm.nih.gov/nuccore/KY703921.1
KY703922.1	2015	Nicaragua	Human	Asian	https://www.ncbi.nlm.nih.gov/nuccore/KY703922.1
KY703923.1	2015	Nicaragua	Human	Asian	https://www.ncbi.nlm.nih.gov/nuccore/KY703923.1
KY703924.1	2015	Nicaragua	Human	Asian	https://www.ncbi.nlm.nih.gov/nuccore/KY703924.1
KY703925.1	2015	Nicaragua	Human	Asian	https://www.ncbi.nlm.nih.gov/nuccore/KY703925.1
KY703926.1	2015	Nicaragua	Human	Asian	https://www.ncbi.nlm.nih.gov/nuccore/KY703926.1
KY703927.1	2015	Nicaragua	Human	Asian	https://www.ncbi.nlm.nih.gov/nuccore/KY703927.1
KY703928.1	2015	Nicaragua	Human	Asian	https://www.ncbi.nlm.nih.gov/nuccore/KY703928.1
KY703930.1	2015	Nicaragua	Human	Asian	https://www.ncbi.nlm.nih.gov/nuccore/KY703930.1
KY703931.1	2015	Nicaragua	Human	Asian	https://www.ncbi.nlm.nih.gov/nuccore/KY703931.1
KY703932.1	2015	Nicaragua	Human	Asian	https://www.ncbi.nlm.nih.gov/nuccore/KY703932.1
KY703933.1	2015	Nicaragua	Human	Asian	https://www.ncbi.nlm.nih.gov/nuccore/KY703933.1
KY703934.1	2015	Nicaragua	Human	Asian	https://www.ncbi.nlm.nih.gov/nuccore/KY703934.1
KY703935.1	2015	Nicaragua	Human	Asian	https://www.ncbi.nlm.nih.gov/nuccore/KY703935.1
KY703936.1	2015	Nicaragua	Human	Asian	https://www.ncbi.nlm.nih.gov/nuccore/KY703936.1
KY703937.1	2015	Nicaragua	Human	Asian	https://www.ncbi.nlm.nih.gov/nuccore/KY703937.1
KY703938.1	2015	Nicaragua	Human	Asian	https://www.ncbi.nlm.nih.gov/nuccore/KY703938.1
KY703940.1	2014	Nicaragua	Human	Asian	https://www.ncbi.nlm.nih.gov/nuccore/KY703940.1
KY703942.1	2015	Nicaragua	Human	Asian	https://www.ncbi.nlm.nih.gov/nuccore/KY703942.1
KY703943.1	2015	Nicaragua	Human	Asian	https://www.ncbi.nlm.nih.gov/nuccore/KY703943.1
KY703944.1	2015	Nicaragua	Human	Asian	https://www.ncbi.nlm.nih.gov/nuccore/KY703944.1
KY703945.1	2015	Nicaragua	Human	Asian	https://www.ncbi.nlm.nih.gov/nuccore/KY703945.1
KY703946.1	2015	Nicaragua	Human	Asian	https://www.ncbi.nlm.nih.gov/nuccore/KY703946.1
KY703947.1	2014	Nicaragua	Human	Asian	https://www.ncbi.nlm.nih.gov/nuccore/KY703947.1
KY703948.1	2015	Nicaragua	Human	Asian	https://www.ncbi.nlm.nih.gov/nuccore/KY703948.1
KY703949.1	2015	Nicaragua	Human	Asian	https://www.ncbi.nlm.nih.gov/nuccore/KY703949.1
KY703950.1	2014	Nicaragua	Human	Asian	https://www.ncbi.nlm.nih.gov/nuccore/KY703950.1
KY703951.1	2015	Nicaragua	Human	Asian	https://www.ncbi.nlm.nih.gov/nuccore/KY703951.1
KY703952.1	2015	Nicaragua	Human	Asian	https://www.ncbi.nlm.nih.gov/nuccore/KY703952.1
KY703954.1	2014	Nicaragua	Human	Asian	https://www.ncbi.nlm.nih.gov/nuccore/KY703954.1
KY703955.1	2015	Nicaragua	Human	Asian	https://www.ncbi.nlm.nih.gov/nuccore/KY703955.1
KY703956.1	2014	Nicaragua	Human	Asian	https://www.ncbi.nlm.nih.gov/nuccore/KY703956.1
KY703957.1	2015	Nicaragua	Human	Asian	https://www.ncbi.nlm.nih.gov/nuccore/KY703957.1
KY703958.1	2015	Nicaragua	Human	Asian	https://www.ncbi.nlm.nih.gov/nuccore/KY703958.1
KY703959.1	2014	Nicaragua	Human	Asian	https://www.ncbi.nlm.nih.gov/nuccore/KY703959.1
KY703960.1	2015	Nicaragua	Human	Asian	https://www.ncbi.nlm.nih.gov/nuccore/KY703960.1
KY703961.1	2015	Nicaragua	Human	Asian	https://www.ncbi.nlm.nih.gov/nuccore/KY703961.1
KY703962.1	2015	Nicaragua	Human	Asian	https://www.ncbi.nlm.nih.gov/nuccore/KY703962.1
KY703963.1	2015	Nicaragua	Human	Asian	https://www.ncbi.nlm.nih.gov/nuccore/KY703963.1
KY703965.1	2015	Nicaragua	Human	Asian	https://www.ncbi.nlm.nih.gov/nuccore/KY703965.1
KY703966.1	2015	Nicaragua	Human	Asian	https://www.ncbi.nlm.nih.gov/nuccore/KY703966.1
KY703967.1	2015	Nicaragua	Human	Asian	https://www.ncbi.nlm.nih.gov/nuccore/KY703967.1
KY703968.1	2015	Nicaragua	Human	Asian	https://www.ncbi.nlm.nih.gov/nuccore/KY703968.1
KY703969.1	2014	Nicaragua	Human	Asian	https://www.ncbi.nlm.nih.gov/nuccore/KY703969.1
KY703970.1	2015	Nicaragua	Human	Asian	https://www.ncbi.nlm.nih.gov/nuccore/KY703970.1
KY703971.1	2015	Nicaragua	Human	Asian	https://www.ncbi.nlm.nih.gov/nuccore/KY703971.1
KY703972.1	2014	Nicaragua	Human	Asian	https://www.ncbi.nlm.nih.gov/nuccore/KY703972.1
KY703973.1	2015	Nicaragua	Human	Asian	https://www.ncbi.nlm.nih.gov/nuccore/KY703973.1
KY703974.1	2015	Nicaragua	Human	Asian	https://www.ncbi.nlm.nih.gov/nuccore/KY703974.1
KY703975.1	2015	Nicaragua	Human	Asian	https://www.ncbi.nlm.nih.gov/nuccore/KY703975.1
KY703976.1	2015	Nicaragua	Human	Asian	https://www.ncbi.nlm.nih.gov/nuccore/KY703976.1
KY703977.1	2015	Nicaragua	Human	Asian	https://www.ncbi.nlm.nih.gov/nuccore/KY703977.1
KY703978.1	2015	Nicaragua	Human	Asian	https://www.ncbi.nlm.nih.gov/nuccore/KY703978.1
KY703979.1	2015	Nicaragua	Human	Asian	https://www.ncbi.nlm.nih.gov/nuccore/KY703979.1
KY703980.1	2015	Nicaragua	Human	Asian	https://www.ncbi.nlm.nih.gov/nuccore/KY703980.1
KY703982.1	2015	Nicaragua	Human	Asian	https://www.ncbi.nlm.nih.gov/nuccore/KY703982.1
KY703983.1	2014	Nicaragua	Human	Asian	https://www.ncbi.nlm.nih.gov/nuccore/KY703983.1
KY703984.1	2014	Nicaragua	Human	Asian	https://www.ncbi.nlm.nih.gov/nuccore/KY703984.1
KY703985.1	2015	Nicaragua	Human	Asian	https://www.ncbi.nlm.nih.gov/nuccore/KY703985.1
KY703986.1	2015	Nicaragua	Human	Asian	https://www.ncbi.nlm.nih.gov/nuccore/KY703986.1
KY703987.1	2015	Nicaragua	Human	Asian	https://www.ncbi.nlm.nih.gov/nuccore/KY703987.1
KY703988.1	2014	Nicaragua	Human	Asian	https://www.ncbi.nlm.nih.gov/nuccore/KY703988.1
KY703989.1	2014	Nicaragua	Human	Asian	https://www.ncbi.nlm.nih.gov/nuccore/KY703989.1
KY703990.1	2015	Nicaragua	Human	Asian	https://www.ncbi.nlm.nih.gov/nuccore/KY703990.1
KY703991.1	2015	Nicaragua	Human	Asian	https://www.ncbi.nlm.nih.gov/nuccore/KY703991.1
KY703992.1	2015	Nicaragua	Human	Asian	https://www.ncbi.nlm.nih.gov/nuccore/KY703992.1
KY703993.1	2014	Nicaragua	Human	Asian	https://www.ncbi.nlm.nih.gov/nuccore/KY703993.1
KY703994.1	2015	Nicaragua	Human	Asian	https://www.ncbi.nlm.nih.gov/nuccore/KY703994.1
KY703995.1	2015	Nicaragua	Human	Asian	https://www.ncbi.nlm.nih.gov/nuccore/KY703995.1
KY703996.1	2015	Nicaragua	Human	Asian	https://www.ncbi.nlm.nih.gov/nuccore/KY703996.1
KY703997.1	2015	Nicaragua	Human	Asian	https://www.ncbi.nlm.nih.gov/nuccore/KY703997.1
KY703998.1	2015	Nicaragua	Human	Asian	https://www.ncbi.nlm.nih.gov/nuccore/KY703998.1
KY703999.1	2015	Nicaragua	Human	Asian	https://www.ncbi.nlm.nih.gov/nuccore/KY703999.1
KY704000.1	2015	Nicaragua	Human	Asian	https://www.ncbi.nlm.nih.gov/nuccore/KY704000.1
KY704001.1	2015	Nicaragua	Human	Asian	https://www.ncbi.nlm.nih.gov/nuccore/KY704001.1
KY704002.1	2015	Nicaragua	Human	Asian	https://www.ncbi.nlm.nih.gov/nuccore/KY704002.1
KY704934.1	2016	Brazil	Human	East-Central-South-African	https://www.ncbi.nlm.nih.gov/nuccore/KY704934.1
KY704943.1	2016	Brazil	Human	East-Central-South-African	https://www.ncbi.nlm.nih.gov/nuccore/KY704943.1
KY704944.1	2016	Brazil	Human	East-Central-South-African	https://www.ncbi.nlm.nih.gov/nuccore/KY704944.1
KY704946.1	2016	Brazil	Human	East-Central-South-African	https://www.ncbi.nlm.nih.gov/nuccore/KY704946.1
KY704950.1	2016	Brazil	Human	East-Central-South-African	https://www.ncbi.nlm.nih.gov/nuccore/KY704950.1
KY704952.1	2016	Brazil	Human	East-Central-South-African	https://www.ncbi.nlm.nih.gov/nuccore/KY704952.1
KY704954.1	2016	Brazil	Human	East-Central-South-African	https://www.ncbi.nlm.nih.gov/nuccore/KY704954.1
KY704955.1	2016	Brazil	Human	East-Central-South-African	https://www.ncbi.nlm.nih.gov/nuccore/KY704955.1
KY751908.1	2016	Australia	Human	East-Central-South-African	https://www.ncbi.nlm.nih.gov/nuccore/KY751908.1
KY883764.1	2013	Singapore	Human	Asian	https://www.ncbi.nlm.nih.gov/nuccore/KY883764.1
L37661.3		USA		Asian	https://www.ncbi.nlm.nih.gov/nuccore/L37661.3
LC259082.1	1958	Thailand	Human	Asian	https://www.ncbi.nlm.nih.gov/nuccore/LC259082.1
LC259083.1	2009	Indonesia	Human	Asian	https://www.ncbi.nlm.nih.gov/nuccore/LC259083.1
LC259084.1	2012	Philippines	Human	Asian	https://www.ncbi.nlm.nih.gov/nuccore/LC259084.1
LC259085.1	2012	Indonesia	Human	Asian	https://www.ncbi.nlm.nih.gov/nuccore/LC259085.1
LC259086.1	2013	Indonesia	Human	Asian	https://www.ncbi.nlm.nih.gov/nuccore/LC259086.1
LC259087.1	2013	Indonesia	Human	Asian	https://www.ncbi.nlm.nih.gov/nuccore/LC259087.1
LC259088.1	2014	Tonga	Human	Asian	https://www.ncbi.nlm.nih.gov/nuccore/LC259088.1
LC259089.1	2014	Dominica	Human	Asian	https://www.ncbi.nlm.nih.gov/nuccore/LC259089.1
LC259090.1	2015	Colombia	Human	Asian	https://www.ncbi.nlm.nih.gov/nuccore/LC259090.1
LC259091.1	2015	Indonesia	Human	Asian	https://www.ncbi.nlm.nih.gov/nuccore/LC259091.1
LC259092.1	2016	Cuba	Human	Asian	https://www.ncbi.nlm.nih.gov/nuccore/LC259092.1
LC259093.1	2009	Malaysia	Human	East-Central-South-African	https://www.ncbi.nlm.nih.gov/nuccore/LC259093.1
LC259094.1	2016	Angola	Human	East-Central-South-African	https://www.ncbi.nlm.nih.gov/nuccore/LC259094.1
LC331252.1	2016	Japan	Human	East-Central-South-African	https://www.ncbi.nlm.nih.gov/nuccore/LC331252.1
LC500215.1	2015	Aruba	Human	Asian	https://www.ncbi.nlm.nih.gov/nuccore/LC500215.1
LC500216.1	2015	Aruba	Human	Asian	https://www.ncbi.nlm.nih.gov/nuccore/LC500216.1
LC500217.1	2015	Aruba	Human	Asian	https://www.ncbi.nlm.nih.gov/nuccore/LC500217.1
LC500218.1	2015	Aruba	Human	Asian	https://www.ncbi.nlm.nih.gov/nuccore/LC500218.1
LC500219.1	2015	Aruba	Human	Asian	https://www.ncbi.nlm.nih.gov/nuccore/LC500219.1
LC500220.1	2015	Aruba	Human	Asian	https://www.ncbi.nlm.nih.gov/nuccore/LC500220.1
LC500221.1	2015	Aruba	Human	Asian	https://www.ncbi.nlm.nih.gov/nuccore/LC500221.1
LC500222.1	2015	Aruba	Human	Asian	https://www.ncbi.nlm.nih.gov/nuccore/LC500222.1
LC580236.1	2017	Bangladesh	Human	East-Central-South-African	https://www.ncbi.nlm.nih.gov/nuccore/LC580236.1
LC580238.1	2017	Bangladesh	Human	East-Central-South-African	https://www.ncbi.nlm.nih.gov/nuccore/LC580238.1
LC580239.1	2017	Bangladesh	Human	East-Central-South-African	https://www.ncbi.nlm.nih.gov/nuccore/LC580239.1
LC580240.1	2017	Bangladesh	Human	East-Central-South-African	https://www.ncbi.nlm.nih.gov/nuccore/LC580240.1
LC580241.1	2017	Bangladesh	Human	East-Central-South-African	https://www.ncbi.nlm.nih.gov/nuccore/LC580241.1
LC580242.1	2017	Bangladesh	Human	East-Central-South-African	https://www.ncbi.nlm.nih.gov/nuccore/LC580242.1
LC580243.1	2017	Bangladesh	Human	East-Central-South-African	https://www.ncbi.nlm.nih.gov/nuccore/LC580243.1
LC580244.1	2017	Bangladesh	Human	East-Central-South-African	https://www.ncbi.nlm.nih.gov/nuccore/LC580244.1
LC580245.1	2017	Bangladesh	Human	East-Central-South-African	https://www.ncbi.nlm.nih.gov/nuccore/LC580245.1
LC580248.1	2017	Bangladesh	Human	East-Central-South-African	https://www.ncbi.nlm.nih.gov/nuccore/LC580248.1
LC580249.1	2017	Bangladesh	Human	East-Central-South-African	https://www.ncbi.nlm.nih.gov/nuccore/LC580249.1
LC580250.1	2017	Bangladesh	Human	East-Central-South-African	https://www.ncbi.nlm.nih.gov/nuccore/LC580250.1
LC580251.1	2017	Bangladesh	Human	East-Central-South-African	https://www.ncbi.nlm.nih.gov/nuccore/LC580251.1
LC580252.1	2017	Bangladesh	Human	East-Central-South-African	https://www.ncbi.nlm.nih.gov/nuccore/LC580252.1
LC580253.1	2017	Bangladesh	Human	East-Central-South-African	https://www.ncbi.nlm.nih.gov/nuccore/LC580253.1
LC580254.1	2017	Bangladesh	Human	East-Central-South-African	https://www.ncbi.nlm.nih.gov/nuccore/LC580254.1
LC580255.1	2017	Bangladesh	Human	East-Central-South-African	https://www.ncbi.nlm.nih.gov/nuccore/LC580255.1
LC580256.1	2019	Thailand	Human	East-Central-South-African	https://www.ncbi.nlm.nih.gov/nuccore/LC580256.1
LC580257.1	2019	Thailand	Human	East-Central-South-African	https://www.ncbi.nlm.nih.gov/nuccore/LC580257.1
LC580258.1	2019	Thailand	Human	East-Central-South-African	https://www.ncbi.nlm.nih.gov/nuccore/LC580258.1
LC580259.1	2019	Thailand	Human	East-Central-South-African	https://www.ncbi.nlm.nih.gov/nuccore/LC580259.1
LC580260.1	2019	Thailand	Human	East-Central-South-African	https://www.ncbi.nlm.nih.gov/nuccore/LC580260.1
LC580261.1	2019	Thailand	Human	East-Central-South-African	https://www.ncbi.nlm.nih.gov/nuccore/LC580261.1
LC580262.1	2019	Thailand	Human	East-Central-South-African	https://www.ncbi.nlm.nih.gov/nuccore/LC580262.1
LC580263.1	2019	Thailand	Human	East-Central-South-African	https://www.ncbi.nlm.nih.gov/nuccore/LC580263.1
LC580264.1	2019	Thailand	Human	East-Central-South-African	https://www.ncbi.nlm.nih.gov/nuccore/LC580264.1
LC580265.1	2019	Thailand	Human	East-Central-South-African	https://www.ncbi.nlm.nih.gov/nuccore/LC580265.1
LC580266.1	2019	Thailand	Human	East-Central-South-African	https://www.ncbi.nlm.nih.gov/nuccore/LC580266.1
LC580267.1	2019	Thailand	Human	East-Central-South-African	https://www.ncbi.nlm.nih.gov/nuccore/LC580267.1
LC580268.1	2019	Thailand	Human	East-Central-South-African	https://www.ncbi.nlm.nih.gov/nuccore/LC580268.1
LC580269.1	2019	Thailand	Human	East-Central-South-African	https://www.ncbi.nlm.nih.gov/nuccore/LC580269.1
LC580270.1	2010	Thailand	Human	East-Central-South-African	https://www.ncbi.nlm.nih.gov/nuccore/LC580270.1
LC598202.1	2020	Thailand	Human	East-Central-South-African	https://www.ncbi.nlm.nih.gov/nuccore/LC598202.1
LC598203.1	2020	Thailand	Human	East-Central-South-African	https://www.ncbi.nlm.nih.gov/nuccore/LC598203.1
LC598204.1	2020	Thailand	Human	East-Central-South-African	https://www.ncbi.nlm.nih.gov/nuccore/LC598204.1
LC598205.1	2020	Thailand	Human	East-Central-South-African	https://www.ncbi.nlm.nih.gov/nuccore/LC598205.1
LC598206.1	2020	Thailand	Human	East-Central-South-African	https://www.ncbi.nlm.nih.gov/nuccore/LC598206.1
LC598207.1	2020	Thailand	Human	East-Central-South-African	https://www.ncbi.nlm.nih.gov/nuccore/LC598207.1
LC598208.1	2020	Thailand	Human	East-Central-South-African	https://www.ncbi.nlm.nih.gov/nuccore/LC598208.1
LC598209.1	2020	Thailand	Human	East-Central-South-African	https://www.ncbi.nlm.nih.gov/nuccore/LC598209.1
LC598210.1	2020	Thailand	Human	East-Central-South-African	https://www.ncbi.nlm.nih.gov/nuccore/LC598210.1
LC664141.1	2019	Maldives	Human	East-Central-South-African	https://www.ncbi.nlm.nih.gov/nuccore/LC664141.1
LC664142.1	2019	Maldives	Human	East-Central-South-African	https://www.ncbi.nlm.nih.gov/nuccore/LC664142.1
LC664143.1	2019	Maldives	Human	East-Central-South-African	https://www.ncbi.nlm.nih.gov/nuccore/LC664143.1
LC664144.1	2019	Maldives	Human	East-Central-South-African	https://www.ncbi.nlm.nih.gov/nuccore/LC664144.1
LC664145.1	2019	Maldives	Human	East-Central-South-African	https://www.ncbi.nlm.nih.gov/nuccore/LC664145.1
LC664146.1	2019	Maldives	Human	East-Central-South-African	https://www.ncbi.nlm.nih.gov/nuccore/LC664146.1
LC664147.1	2019	Maldives	Human	East-Central-South-African	https://www.ncbi.nlm.nih.gov/nuccore/LC664147.1
LC664148.1	2019	Maldives	Human	East-Central-South-African	https://www.ncbi.nlm.nih.gov/nuccore/LC664148.1
LC664149.1	2019	Maldives	Human	East-Central-South-African	https://www.ncbi.nlm.nih.gov/nuccore/LC664149.1
LC664150.1	2019	Maldives	Human	East-Central-South-African	https://www.ncbi.nlm.nih.gov/nuccore/LC664150.1
LC664151.1	2019	Maldives	Human	East-Central-South-African	https://www.ncbi.nlm.nih.gov/nuccore/LC664151.1
LC664152.1	2019	Maldives	Human	East-Central-South-African	https://www.ncbi.nlm.nih.gov/nuccore/LC664152.1
LC664153.1	2019	Maldives	Human	East-Central-South-African	https://www.ncbi.nlm.nih.gov/nuccore/LC664153.1
LC664154.1	2019	Maldives	Human	East-Central-South-African	https://www.ncbi.nlm.nih.gov/nuccore/LC664154.1
LC664155.1	2019	Maldives	Human	East-Central-South-African	https://www.ncbi.nlm.nih.gov/nuccore/LC664155.1
LC664156.1	2019	Maldives	Human	East-Central-South-African	https://www.ncbi.nlm.nih.gov/nuccore/LC664156.1
LC664157.1	2020	Thailand	Human	East-Central-South-African	https://www.ncbi.nlm.nih.gov/nuccore/LC664157.1
LC664158.1	2020	Thailand	Human	East-Central-South-African	https://www.ncbi.nlm.nih.gov/nuccore/LC664158.1
LC664159.1	2020	Thailand	Human	East-Central-South-African	https://www.ncbi.nlm.nih.gov/nuccore/LC664159.1
LC664160.1	2020	Thailand	Human	East-Central-South-African	https://www.ncbi.nlm.nih.gov/nuccore/LC664160.1
LC664161.1	2020	Thailand	Human	East-Central-South-African	https://www.ncbi.nlm.nih.gov/nuccore/LC664161.1
LC664162.1	2020	Thailand	Human	East-Central-South-African	https://www.ncbi.nlm.nih.gov/nuccore/LC664162.1
LC664163.1	2020	Thailand	Human	East-Central-South-African	https://www.ncbi.nlm.nih.gov/nuccore/LC664163.1
LC664164.1	2020	Thailand	Human	East-Central-South-African	https://www.ncbi.nlm.nih.gov/nuccore/LC664164.1
LC664165.1	2020	Thailand	Human	East-Central-South-African	https://www.ncbi.nlm.nih.gov/nuccore/LC664165.1
LC664166.1	2020	Thailand	Human	East-Central-South-African	https://www.ncbi.nlm.nih.gov/nuccore/LC664166.1
LN898093.1	2013	Martinique	Human	Asian	https://www.ncbi.nlm.nih.gov/nuccore/LN898093.1
LN898094.1	2014	Guadeloupe	Human	Asian	https://www.ncbi.nlm.nih.gov/nuccore/LN898094.1
LN898095.1	2014	Martinique	Human	Asian	https://www.ncbi.nlm.nih.gov/nuccore/LN898095.1
LN898096.1	2014	Martinique	Human	Asian	https://www.ncbi.nlm.nih.gov/nuccore/LN898096.1
LN898097.1	2014	Guadeloupe	Human	Asian	https://www.ncbi.nlm.nih.gov/nuccore/LN898097.1
LN898098.1	2014	Guadeloupe	Human	Asian	https://www.ncbi.nlm.nih.gov/nuccore/LN898098.1
LN898100.1	2014	Martinique	Human	Asian	https://www.ncbi.nlm.nih.gov/nuccore/LN898100.1
LN898101.1	2014	Martinique	Human	Asian	https://www.ncbi.nlm.nih.gov/nuccore/LN898101.1
LN898103.1	2014	Martinique	Human	Asian	https://www.ncbi.nlm.nih.gov/nuccore/LN898103.1
LN898104.1	2014	Martinique	Human	Asian	https://www.ncbi.nlm.nih.gov/nuccore/LN898104.1
LN898105.1	2014	Martinique	Human	Asian	https://www.ncbi.nlm.nih.gov/nuccore/LN898105.1
LN898106.1	2014	Martinique	Human	Asian	https://www.ncbi.nlm.nih.gov/nuccore/LN898106.1
LN898107.1	2014	Martinique	Human	Asian	https://www.ncbi.nlm.nih.gov/nuccore/LN898107.1
LN898108.1	2014	Martinique	Human	Asian	https://www.ncbi.nlm.nih.gov/nuccore/LN898108.1
LN898109.1	2014	Martinique	Human	Asian	https://www.ncbi.nlm.nih.gov/nuccore/LN898109.1
LN898110.1	2014	Guadeloupe	Human	Asian	https://www.ncbi.nlm.nih.gov/nuccore/LN898110.1
LN898111.1	2014	Guadeloupe	Human	Asian	https://www.ncbi.nlm.nih.gov/nuccore/LN898111.1
LN898112.1	2014	Martinique	Human	Asian	https://www.ncbi.nlm.nih.gov/nuccore/LN898112.1
LN901341.1	2012	Laos	Human	East-Central-South-African	https://www.ncbi.nlm.nih.gov/nuccore/LN901341.1
LN901344.1	2013	Laos	Human	East-Central-South-African	https://www.ncbi.nlm.nih.gov/nuccore/LN901344.1
LN901345.1	2013	Laos	Human	East-Central-South-African	https://www.ncbi.nlm.nih.gov/nuccore/LN901345.1
LN901346.1	2012	Laos	Human	East-Central-South-African	https://www.ncbi.nlm.nih.gov/nuccore/LN901346.1
LN901347.1	2012	Laos	Human	East-Central-South-African	https://www.ncbi.nlm.nih.gov/nuccore/LN901347.1
LN901348.1	2013	Laos	Human	East-Central-South-African	https://www.ncbi.nlm.nih.gov/nuccore/LN901348.1
LN901349.1	2013	Laos	Human	East-Central-South-African	https://www.ncbi.nlm.nih.gov/nuccore/LN901349.1
LN901350.1	2013	Laos	Human	East-Central-South-African	https://www.ncbi.nlm.nih.gov/nuccore/LN901350.1
LN901351.1	2013	Laos	Human	East-Central-South-African	https://www.ncbi.nlm.nih.gov/nuccore/LN901351.1
LN901354.1	2012	Laos	Human	East-Central-South-African	https://www.ncbi.nlm.nih.gov/nuccore/LN901354.1
LN901355.1	2013	Laos	Human	East-Central-South-African	https://www.ncbi.nlm.nih.gov/nuccore/LN901355.1
LN901356.1	2013	Laos	Human	East-Central-South-African	https://www.ncbi.nlm.nih.gov/nuccore/LN901356.1
LN901357.1	2013	Laos	Human	East-Central-South-African	https://www.ncbi.nlm.nih.gov/nuccore/LN901357.1
LN901358.1	2013	Laos	Human	East-Central-South-African	https://www.ncbi.nlm.nih.gov/nuccore/LN901358.1
LN901359.1	2013	Laos	Human	East-Central-South-African	https://www.ncbi.nlm.nih.gov/nuccore/LN901359.1
LN901366.1	2012	Laos	Human	East-Central-South-African	https://www.ncbi.nlm.nih.gov/nuccore/LN901366.1
LN901368.1	2012	Laos	Human	East-Central-South-African	https://www.ncbi.nlm.nih.gov/nuccore/LN901368.1
MF001505.1	2015	USA	Human	Asian	https://www.ncbi.nlm.nih.gov/nuccore/MF001505.1
MF001506.1	2015	USA	Human	Asian	https://www.ncbi.nlm.nih.gov/nuccore/MF001506.1
MF001507.1	2015	USA	Human	Asian	https://www.ncbi.nlm.nih.gov/nuccore/MF001507.1
MF001508.1	2015	USA	Human	Asian	https://www.ncbi.nlm.nih.gov/nuccore/MF001508.1
MF001509.1	2015	USA	Human	Asian	https://www.ncbi.nlm.nih.gov/nuccore/MF001509.1
MF001510.1	2015	USA	Human	Asian	https://www.ncbi.nlm.nih.gov/nuccore/MF001510.1
MF001511.1	2015	USA	Human	Asian	https://www.ncbi.nlm.nih.gov/nuccore/MF001511.1
MF001512.1	2015	USA	Human	Asian	https://www.ncbi.nlm.nih.gov/nuccore/MF001512.1
MF001513.1	2015	USA	Human	Asian	https://www.ncbi.nlm.nih.gov/nuccore/MF001513.1
MF001514.1	2015	USA	Human	Asian	https://www.ncbi.nlm.nih.gov/nuccore/MF001514.1
MF001515.1	2015	USA	Human	Asian	https://www.ncbi.nlm.nih.gov/nuccore/MF001515.1
MF001516.1	2015	USA	Human	Asian	https://www.ncbi.nlm.nih.gov/nuccore/MF001516.1
MF001517.1	2015	USA	Human	Asian	https://www.ncbi.nlm.nih.gov/nuccore/MF001517.1
MF001518.1	2015	USA	Human	Asian	https://www.ncbi.nlm.nih.gov/nuccore/MF001518.1
MF001519.1	2015	USA	Human	Asian	https://www.ncbi.nlm.nih.gov/nuccore/MF001519.1
MF076568.1	2013	Laos	Human	East-Central-South-African	https://www.ncbi.nlm.nih.gov/nuccore/MF076568.1
MF076569.1	2013	Laos	Human	East-Central-South-African	https://www.ncbi.nlm.nih.gov/nuccore/MF076569.1
MF076570.1	2013	Laos	Human	East-Central-South-African	https://www.ncbi.nlm.nih.gov/nuccore/MF076570.1
MF076571.1	2013	Laos	Human	East-Central-South-African	https://www.ncbi.nlm.nih.gov/nuccore/MF076571.1
MF076572.1	2013	Laos	Human	East-Central-South-African	https://www.ncbi.nlm.nih.gov/nuccore/MF076572.1
MF076573.1	2012	Laos	Human	East-Central-South-African	https://www.ncbi.nlm.nih.gov/nuccore/MF076573.1
MF076574.1	2012	Laos	Human	East-Central-South-African	https://www.ncbi.nlm.nih.gov/nuccore/MF076574.1
MF076576.1	2012	Laos	Human	East-Central-South-African	https://www.ncbi.nlm.nih.gov/nuccore/MF076576.1
MF076577.1	2012	Laos	Mosquito	East-Central-South-African	https://www.ncbi.nlm.nih.gov/nuccore/MF076577.1
MF346356.1	2015	India	Human	East-Central-South-African	https://www.ncbi.nlm.nih.gov/nuccore/MF346356.1
MF346357.1	2016	India	Human	East-Central-South-African	https://www.ncbi.nlm.nih.gov/nuccore/MF346357.1
MF346358.1	2016	India	Human	East-Central-South-African	https://www.ncbi.nlm.nih.gov/nuccore/MF346358.1
MF346359.1	2015	India	Human	East-Central-South-African	https://www.ncbi.nlm.nih.gov/nuccore/MF346359.1
MF499120.1	2016	China	Human	East-Central-South-African	https://www.ncbi.nlm.nih.gov/nuccore/MF499120.1
MF503628.1	2016	China	Human	East-Central-South-African	https://www.ncbi.nlm.nih.gov/nuccore/MF503628.1
MF580946.1			Human	East-Central-South-African	https://www.ncbi.nlm.nih.gov/nuccore/MF580946.1
MF740874.1	2017	Pakistan	Human	East-Central-South-African	https://www.ncbi.nlm.nih.gov/nuccore/MF740874.1
MF773559.1	2014	Samoa	Human	Asian	https://www.ncbi.nlm.nih.gov/nuccore/MF773559.1
MF773560.1	2014		Human	Asian	https://www.ncbi.nlm.nih.gov/nuccore/MF773560.1
MF773561.1	2011	Indonesia	Human	Asian	https://www.ncbi.nlm.nih.gov/nuccore/MF773561.1
MF773562.1	2015	Kiribati	Human	Asian	https://www.ncbi.nlm.nih.gov/nuccore/MF773562.1
MF773563.1	2014	Philippines	Human	Asian	https://www.ncbi.nlm.nih.gov/nuccore/MF773563.1
MF773564.1	2016	Philippines	Human	Asian	https://www.ncbi.nlm.nih.gov/nuccore/MF773564.1
MF773565.1	2010	Timor-Leste	Human	Asian	https://www.ncbi.nlm.nih.gov/nuccore/MF773565.1
MF773566.1	2017	Bangladesh	Human	East-Central-South-African	https://www.ncbi.nlm.nih.gov/nuccore/MF773566.1
MF773567.1	2011	Borneo	Human	East-Central-South-African	https://www.ncbi.nlm.nih.gov/nuccore/MF773567.1
MF773568.1	2008	Malaysia	Human	East-Central-South-African	https://www.ncbi.nlm.nih.gov/nuccore/MF773568.1
MF773569.1	2013	Papua New Guinea	Human	East-Central-South-African	https://www.ncbi.nlm.nih.gov/nuccore/MF773569.1
MF774613.1	2016	Pakistan	Human	East-Central-South-African	https://www.ncbi.nlm.nih.gov/nuccore/MF774613.1
MF774614.1	2016	Pakistan	Human	East-Central-South-African	https://www.ncbi.nlm.nih.gov/nuccore/MF774614.1
MF774615.1	2016	Pakistan	Human	East-Central-South-African	https://www.ncbi.nlm.nih.gov/nuccore/MF774615.1
MF774616.1	2016	Pakistan	Human	East-Central-South-African	https://www.ncbi.nlm.nih.gov/nuccore/MF774616.1
MF774617.1	2016	Pakistan	Human	East-Central-South-African	https://www.ncbi.nlm.nih.gov/nuccore/MF774617.1
MF774618.1	2016	Pakistan	Human	East-Central-South-African	https://www.ncbi.nlm.nih.gov/nuccore/MF774618.1
MF774619.1	2016	Pakistan	Human	East-Central-South-African	https://www.ncbi.nlm.nih.gov/nuccore/MF774619.1
MG000875.1	2016	Haiti	Mosquito	East-Central-South-African	https://www.ncbi.nlm.nih.gov/nuccore/MG000875.1
MG000876.1	2016	Haiti	Mosquito	East-Central-South-African	https://www.ncbi.nlm.nih.gov/nuccore/MG000876.1
MG049915.1	2017	Italy	Human	East-Central-South-African	https://www.ncbi.nlm.nih.gov/nuccore/MG049915.1
MG137428.1	2016	India	Human	East-Central-South-African	https://www.ncbi.nlm.nih.gov/nuccore/MG137428.1
MG280943.1				East-Central-South-African	https://www.ncbi.nlm.nih.gov/nuccore/MG280943.1
MG649970.1	2016	Brazil	Human	East-Central-South-African	https://www.ncbi.nlm.nih.gov/nuccore/MG649970.1
MG649971.1	2016	Brazil	Human	East-Central-South-African	https://www.ncbi.nlm.nih.gov/nuccore/MG649971.1
MG649972.1	2016	Brazil	Human	East-Central-South-African	https://www.ncbi.nlm.nih.gov/nuccore/MG649972.1
MG649973.1	2016	Brazil	Human	East-Central-South-African	https://www.ncbi.nlm.nih.gov/nuccore/MG649973.1
MG649974.1	2016	Brazil	Human	East-Central-South-African	https://www.ncbi.nlm.nih.gov/nuccore/MG649974.1
MG649975.1	2016	Brazil	Human	East-Central-South-African	https://www.ncbi.nlm.nih.gov/nuccore/MG649975.1
MG649976.1	2016	Brazil	Human	East-Central-South-African	https://www.ncbi.nlm.nih.gov/nuccore/MG649976.1
MG649977.1	2016	Brazil	Human	East-Central-South-African	https://www.ncbi.nlm.nih.gov/nuccore/MG649977.1
MG649978.1	2017	Brazil	Human	East-Central-South-African	https://www.ncbi.nlm.nih.gov/nuccore/MG649978.1
MG649979.1	2017	Brazil	Human	East-Central-South-African	https://www.ncbi.nlm.nih.gov/nuccore/MG649979.1
MG649980.1	2016	Brazil	Human	East-Central-South-African	https://www.ncbi.nlm.nih.gov/nuccore/MG649980.1
MG649981.1	2016	Brazil	Human	East-Central-South-African	https://www.ncbi.nlm.nih.gov/nuccore/MG649981.1
MG649982.1	2017	Brazil	Human	East-Central-South-African	https://www.ncbi.nlm.nih.gov/nuccore/MG649982.1
MG649983.1	2016	Brazil	Human	East-Central-South-African	https://www.ncbi.nlm.nih.gov/nuccore/MG649983.1
MG649984.1	2015	Brazil	Human	East-Central-South-African	https://www.ncbi.nlm.nih.gov/nuccore/MG649984.1
MG649985.1	2015	Brazil	Human	East-Central-South-African	https://www.ncbi.nlm.nih.gov/nuccore/MG649985.1
MG664850.1	2010	China	Human	East-Central-South-African	https://www.ncbi.nlm.nih.gov/nuccore/MG664850.1
MG664851.1	2012	China	Human	Asian	https://www.ncbi.nlm.nih.gov/nuccore/MG664851.1
MG822707.1	2015	Mexico	Human	Asian	https://www.ncbi.nlm.nih.gov/nuccore/MG822707.1
MG822708.1	2015	Mexico	Human	Asian	https://www.ncbi.nlm.nih.gov/nuccore/MG822708.1
MG912993.1	2017	China	Human	East-Central-South-African	https://www.ncbi.nlm.nih.gov/nuccore/MG912993.1
MG921596.1	2015	Mexico	Human	Asian	https://www.ncbi.nlm.nih.gov/nuccore/MG921596.1
MG925665.1	2017	China	Human	East-Central-South-African	https://www.ncbi.nlm.nih.gov/nuccore/MG925665.1
MG967666.1	2014	Haiti	Human	Asian	https://www.ncbi.nlm.nih.gov/nuccore/MG967666.1
MH000700.1	2016	Brazil	Human	East-Central-South-African	https://www.ncbi.nlm.nih.gov/nuccore/MH000700.1
MH000702.1	2016	Brazil	Human	East-Central-South-African	https://www.ncbi.nlm.nih.gov/nuccore/MH000702.1
MH000703.1	2016	Brazil	Human	East-Central-South-African	https://www.ncbi.nlm.nih.gov/nuccore/MH000703.1
MH000704.1	2016	Brazil	Human	East-Central-South-African	https://www.ncbi.nlm.nih.gov/nuccore/MH000704.1
MH000705.1	2016	Brazil	Human	East-Central-South-African	https://www.ncbi.nlm.nih.gov/nuccore/MH000705.1
MH000706.1	2016	Brazil	Human	East-Central-South-African	https://www.ncbi.nlm.nih.gov/nuccore/MH000706.1
MH124570.2	2010	India	Human	East-Central-South-African	https://www.ncbi.nlm.nih.gov/nuccore/MH124570.2
MH124571.1	2010	India	Human	East-Central-South-African	https://www.ncbi.nlm.nih.gov/nuccore/MH124571.1
MH124572.1	2010	India	Human	East-Central-South-African	https://www.ncbi.nlm.nih.gov/nuccore/MH124572.1
MH124573.1	2010	India	Human	East-Central-South-African	https://www.ncbi.nlm.nih.gov/nuccore/MH124573.1
MH124575.1	2010	India	Human	East-Central-South-African	https://www.ncbi.nlm.nih.gov/nuccore/MH124575.1
MH124578.1	2010	India	Human	East-Central-South-African	https://www.ncbi.nlm.nih.gov/nuccore/MH124578.1
MH124579.1	2010	India	Human	East-Central-South-African	https://www.ncbi.nlm.nih.gov/nuccore/MH124579.1
MH124580.1	2016	India	Human	East-Central-South-African	https://www.ncbi.nlm.nih.gov/nuccore/MH124580.1
MH124581.1	2016	India	Human	East-Central-South-African	https://www.ncbi.nlm.nih.gov/nuccore/MH124581.1
MH124582.1	2016	India	Human	East-Central-South-African	https://www.ncbi.nlm.nih.gov/nuccore/MH124582.1
MH229986.1	2006	Mauritius	Human	East-Central-South-African	https://www.ncbi.nlm.nih.gov/nuccore/MH229986.1
MH329293.1	2014	Colombia	Human	Asian	https://www.ncbi.nlm.nih.gov/nuccore/MH329293.1
MH329294.1	2014	Colombia	Human	Asian	https://www.ncbi.nlm.nih.gov/nuccore/MH329294.1
MH329295.1	2014	Colombia	Human	Asian	https://www.ncbi.nlm.nih.gov/nuccore/MH329295.1
MH329296.1	2014	Colombia	Human	Asian	https://www.ncbi.nlm.nih.gov/nuccore/MH329296.1
MH329297.1	2014	Colombia	Human	Asian	https://www.ncbi.nlm.nih.gov/nuccore/MH329297.1
MH329298.1	2014	Colombia	Human	Asian	https://www.ncbi.nlm.nih.gov/nuccore/MH329298.1
MH329299.1	2014	Colombia	Human	Asian	https://www.ncbi.nlm.nih.gov/nuccore/MH329299.1
MH329300.1	2014	Colombia	Human	Asian	https://www.ncbi.nlm.nih.gov/nuccore/MH329300.1
MH329301.1	2014	Colombia	Human	Asian	https://www.ncbi.nlm.nih.gov/nuccore/MH329301.1
MH329302.1	2014	Colombia	Human	Asian	https://www.ncbi.nlm.nih.gov/nuccore/MH329302.1
MH329303.1	2014	Colombia	Human	Asian	https://www.ncbi.nlm.nih.gov/nuccore/MH329303.1
MH329304.1	2014	Colombia	Human	Asian	https://www.ncbi.nlm.nih.gov/nuccore/MH329304.1
MH347340.1	2015	India	Human	East-Central-South-African	https://www.ncbi.nlm.nih.gov/nuccore/MH347340.1
MH347341.1	2015	India	Human	East-Central-South-African	https://www.ncbi.nlm.nih.gov/nuccore/MH347341.1
MH347342.1	2016	India	Human	East-Central-South-African	https://www.ncbi.nlm.nih.gov/nuccore/MH347342.1
MH347343.1	2015	India	Human	East-Central-South-African	https://www.ncbi.nlm.nih.gov/nuccore/MH347343.1
MH347344.1	2015	India	Human	East-Central-South-African	https://www.ncbi.nlm.nih.gov/nuccore/MH347344.1
MH349097.1	2017	China	Human	East-Central-South-African	https://www.ncbi.nlm.nih.gov/nuccore/MH349097.1
MH358395.1	2015	India	Human	East-Central-South-African	https://www.ncbi.nlm.nih.gov/nuccore/MH358395.1
MH359139.1	2014	Colombia	Human	Asian	https://www.ncbi.nlm.nih.gov/nuccore/MH359139.1
MH359140.1	2014	Colombia	Human	Asian	https://www.ncbi.nlm.nih.gov/nuccore/MH359140.1
MH359141.1	2014	Colombia	Human	Asian	https://www.ncbi.nlm.nih.gov/nuccore/MH359141.1
MH359142.1	2014	Colombia	Human	Asian	https://www.ncbi.nlm.nih.gov/nuccore/MH359142.1
MH400249.1	2017	China	Human	East-Central-South-African	https://www.ncbi.nlm.nih.gov/nuccore/MH400249.1
MH423797.1	2016	Kenya	Human	East-Central-South-African	https://www.ncbi.nlm.nih.gov/nuccore/MH423797.1
MH423798.1	2016	Kenya	Human	East-Central-South-African	https://www.ncbi.nlm.nih.gov/nuccore/MH423798.1
MH423799.1	2016	Kenya	Human	East-Central-South-African	https://www.ncbi.nlm.nih.gov/nuccore/MH423799.1
MH423800.1	2016	Kenya	Human	East-Central-South-African	https://www.ncbi.nlm.nih.gov/nuccore/MH423800.1
MH423801.1	2016	Kenya	Human	East-Central-South-African	https://www.ncbi.nlm.nih.gov/nuccore/MH423801.1
MH423802.1	2016	Kenya	Human	East-Central-South-African	https://www.ncbi.nlm.nih.gov/nuccore/MH423802.1
MH423803.1	2016	Kenya	Human	East-Central-South-African	https://www.ncbi.nlm.nih.gov/nuccore/MH423803.1
MH423804.1	2016	Kenya	Human	East-Central-South-African	https://www.ncbi.nlm.nih.gov/nuccore/MH423804.1
MH423805.1	2016	Kenya	Human	East-Central-South-African	https://www.ncbi.nlm.nih.gov/nuccore/MH423805.1
MH423806.1	2016	Kenya	Human	East-Central-South-African	https://www.ncbi.nlm.nih.gov/nuccore/MH423806.1
MH423807.1	2016	Kenya	Human	East-Central-South-African	https://www.ncbi.nlm.nih.gov/nuccore/MH423807.1
MH423808.1	2016	Kenya	Human	East-Central-South-African	https://www.ncbi.nlm.nih.gov/nuccore/MH423808.1
MH423809.1	2016	Kenya	Human	East-Central-South-African	https://www.ncbi.nlm.nih.gov/nuccore/MH423809.1
MH423810.1	2016	Kenya	Human	East-Central-South-African	https://www.ncbi.nlm.nih.gov/nuccore/MH423810.1
MH423811.1	2016	Kenya	Human	East-Central-South-African	https://www.ncbi.nlm.nih.gov/nuccore/MH423811.1
MH481881.1	2015	Mexico	Human	Asian	https://www.ncbi.nlm.nih.gov/nuccore/MH481881.1
MH481882.1	2015	Mexico	Human	Asian	https://www.ncbi.nlm.nih.gov/nuccore/MH481882.1
MH481884.1	2015	Mexico	Human	Asian	https://www.ncbi.nlm.nih.gov/nuccore/MH481884.1
MH481885.1	2015	Mexico	Human	Asian	https://www.ncbi.nlm.nih.gov/nuccore/MH481885.1
MH481887.1	2015	Mexico	Human	Asian	https://www.ncbi.nlm.nih.gov/nuccore/MH481887.1
MH481888.1	2015	Mexico	Human	Asian	https://www.ncbi.nlm.nih.gov/nuccore/MH481888.1
MH481890.1	2015	Mexico	Human	Asian	https://www.ncbi.nlm.nih.gov/nuccore/MH481890.1
MH481891.1	2015	Mexico	Human	Asian	https://www.ncbi.nlm.nih.gov/nuccore/MH481891.1
MH481893.1	2015	Mexico	Human	Asian	https://www.ncbi.nlm.nih.gov/nuccore/MH481893.1
MH481894.1	2015	Mexico	Human	Asian	https://www.ncbi.nlm.nih.gov/nuccore/MH481894.1
MH481895.1	2015	Mexico	Human	Asian	https://www.ncbi.nlm.nih.gov/nuccore/MH481895.1
MH481896.1	2015	Mexico	Human	Asian	https://www.ncbi.nlm.nih.gov/nuccore/MH481896.1
MH481898.1	2015	Mexico	Human	Asian	https://www.ncbi.nlm.nih.gov/nuccore/MH481898.1
MH481900.1	2015	Mexico	Human	Asian	https://www.ncbi.nlm.nih.gov/nuccore/MH481900.1
MH507158.1	2017	Italy	Human	East-Central-South-African	https://www.ncbi.nlm.nih.gov/nuccore/MH507158.1
MH647180.1	2011	Singapore	Human	East-Central-South-African	https://www.ncbi.nlm.nih.gov/nuccore/MH647180.1
MH647181.1	2011	Singapore	Human	East-Central-South-African	https://www.ncbi.nlm.nih.gov/nuccore/MH647181.1
MH647182.1	2012	Singapore	Human	East-Central-South-African	https://www.ncbi.nlm.nih.gov/nuccore/MH647182.1
MH647183.1	2012	Singapore	Human	Asian	https://www.ncbi.nlm.nih.gov/nuccore/MH647183.1
MH647184.1	2012	Singapore	Human	East-Central-South-African	https://www.ncbi.nlm.nih.gov/nuccore/MH647184.1
MH647185.1	2012	Singapore	Human	Asian	https://www.ncbi.nlm.nih.gov/nuccore/MH647185.1
MH647186.1	2012	Singapore	Human	East-Central-South-African	https://www.ncbi.nlm.nih.gov/nuccore/MH647186.1
MH647187.1	2013	Singapore	Human	East-Central-South-African	https://www.ncbi.nlm.nih.gov/nuccore/MH647187.1
MH647188.1	2013	Singapore	Human	East-Central-South-African	https://www.ncbi.nlm.nih.gov/nuccore/MH647188.1
MH647189.1	2013	Singapore	Human	East-Central-South-African	https://www.ncbi.nlm.nih.gov/nuccore/MH647189.1
MH647190.1	2013	Singapore	Human	East-Central-South-African	https://www.ncbi.nlm.nih.gov/nuccore/MH647190.1
MH647191.1	2013	Singapore	Human	East-Central-South-African	https://www.ncbi.nlm.nih.gov/nuccore/MH647191.1
MH647192.1	2013	Singapore	Human	East-Central-South-African	https://www.ncbi.nlm.nih.gov/nuccore/MH647192.1
MH647193.1	2013	Singapore	Human	Asian	https://www.ncbi.nlm.nih.gov/nuccore/MH647193.1
MH647194.1	2013	Singapore	Human	East-Central-South-African	https://www.ncbi.nlm.nih.gov/nuccore/MH647194.1
MH647195.1	2013	Singapore	Human	East-Central-South-African	https://www.ncbi.nlm.nih.gov/nuccore/MH647195.1
MH647196.1	2013	Singapore	Human	East-Central-South-African	https://www.ncbi.nlm.nih.gov/nuccore/MH647196.1
MH647197.1	2013	Singapore	Human	East-Central-South-African	https://www.ncbi.nlm.nih.gov/nuccore/MH647197.1
MH647198.1	2013	Singapore	Human	East-Central-South-African	https://www.ncbi.nlm.nih.gov/nuccore/MH647198.1
MH647199.1	2013	Singapore	Human	East-Central-South-African	https://www.ncbi.nlm.nih.gov/nuccore/MH647199.1
MH647200.1	2013	Singapore	Human	East-Central-South-African	https://www.ncbi.nlm.nih.gov/nuccore/MH647200.1
MH647201.1	2013	Singapore	Human	East-Central-South-African	https://www.ncbi.nlm.nih.gov/nuccore/MH647201.1
MH647202.1	2014	Singapore	Human	East-Central-South-African	https://www.ncbi.nlm.nih.gov/nuccore/MH647202.1
MH647203.1	2014	Singapore	Human	East-Central-South-African	https://www.ncbi.nlm.nih.gov/nuccore/MH647203.1
MH647204.1	2014	Singapore	Human	East-Central-South-African	https://www.ncbi.nlm.nih.gov/nuccore/MH647204.1
MH647205.1	2014	Singapore	Human	East-Central-South-African	https://www.ncbi.nlm.nih.gov/nuccore/MH647205.1
MH647206.1	2014	Singapore	Human	East-Central-South-African	https://www.ncbi.nlm.nih.gov/nuccore/MH647206.1
MH647207.1	2015	Singapore	Human	East-Central-South-African	https://www.ncbi.nlm.nih.gov/nuccore/MH647207.1
MH647208.1	2017	Singapore	Human	East-Central-South-African	https://www.ncbi.nlm.nih.gov/nuccore/MH647208.1
MH647209.1	2013	Singapore	Human	East-Central-South-African	https://www.ncbi.nlm.nih.gov/nuccore/MH647209.1
MH647210.1	2009	Singapore	Human	East-Central-South-African	https://www.ncbi.nlm.nih.gov/nuccore/MH647210.1
MH647211.1	2009	Singapore	Human	East-Central-South-African	https://www.ncbi.nlm.nih.gov/nuccore/MH647211.1
MH647212.1	2009	Singapore	Human	East-Central-South-African	https://www.ncbi.nlm.nih.gov/nuccore/MH647212.1
MH647213.1	2010	Singapore	Human	East-Central-South-African	https://www.ncbi.nlm.nih.gov/nuccore/MH647213.1
MH647214.1	2010	Singapore	Human	East-Central-South-African	https://www.ncbi.nlm.nih.gov/nuccore/MH647214.1
MH647215.1	2010	Singapore	Human	East-Central-South-African	https://www.ncbi.nlm.nih.gov/nuccore/MH647215.1
MH647217.1	2013	Singapore	Human	East-Central-South-African	https://www.ncbi.nlm.nih.gov/nuccore/MH647217.1
MH647218.1	2013	Singapore	Human	East-Central-South-African	https://www.ncbi.nlm.nih.gov/nuccore/MH647218.1
MH670649.1	2009	China	Human	Asian	https://www.ncbi.nlm.nih.gov/nuccore/MH670649.1
MH754507.1	2017	Italy	Mosquito	East-Central-South-African	https://www.ncbi.nlm.nih.gov/nuccore/MH754507.1
MH823663.1	2017	Brazil	Human	East-Central-South-African	https://www.ncbi.nlm.nih.gov/nuccore/MH823663.1
MH823664.1	2017	Brazil	Human	East-Central-South-African	https://www.ncbi.nlm.nih.gov/nuccore/MH823664.1
MH823665.1	2017	Brazil	Human	East-Central-South-African	https://www.ncbi.nlm.nih.gov/nuccore/MH823665.1
MH823666.1	2017	Brazil	Human	East-Central-South-African	https://www.ncbi.nlm.nih.gov/nuccore/MH823666.1
MH823667.1	2017	Brazil	Human	East-Central-South-African	https://www.ncbi.nlm.nih.gov/nuccore/MH823667.1
MH823668.1	2017	Brazil	Human	East-Central-South-African	https://www.ncbi.nlm.nih.gov/nuccore/MH823668.1
MK028836.1	2005	Comoros	Mosquito	East-Central-South-African	https://www.ncbi.nlm.nih.gov/nuccore/MK028836.1
MK028837.1	1983	Senegal	Mosquito	West African	https://www.ncbi.nlm.nih.gov/nuccore/MK028837.1
MK028838.1	2006	Sri Lanka	Human	East-Central-South-African	https://www.ncbi.nlm.nih.gov/nuccore/MK028838.1
MK028839.1	1986	USA	Human	Asian	https://www.ncbi.nlm.nih.gov/nuccore/MK028839.1
MK028840.1	1962	Thailand	Human	Asian	https://www.ncbi.nlm.nih.gov/nuccore/MK028840.1
MK040570.1	2018	Thailand	Human	East-Central-South-African	https://www.ncbi.nlm.nih.gov/nuccore/MK040570.1
MK040571.1	2018	Thailand	Human	East-Central-South-African	https://www.ncbi.nlm.nih.gov/nuccore/MK040571.1
MK086029.1	2006	Sri Lanka	Human	East-Central-South-African	https://www.ncbi.nlm.nih.gov/nuccore/MK086029.1
MK120194.1	2017	Italy	Mosquito	East-Central-South-African	https://www.ncbi.nlm.nih.gov/nuccore/MK120194.1
MK120195.1	2017	Italy	Human	East-Central-South-African	https://www.ncbi.nlm.nih.gov/nuccore/MK120195.1
MK120196.1	2017	Italy	Human	East-Central-South-African	https://www.ncbi.nlm.nih.gov/nuccore/MK120196.1
MK120197.1	2017	Italy	Human	East-Central-South-African	https://www.ncbi.nlm.nih.gov/nuccore/MK120197.1
MK120198.1	2017	Italy	Human	East-Central-South-African	https://www.ncbi.nlm.nih.gov/nuccore/MK120198.1
MK120199.1	2017	Italy	Human	East-Central-South-African	https://www.ncbi.nlm.nih.gov/nuccore/MK120199.1
MK120200.1	2017	Italy	Human	East-Central-South-African	https://www.ncbi.nlm.nih.gov/nuccore/MK120200.1
MK120201.1	2007	Italy	Human	East-Central-South-African	https://www.ncbi.nlm.nih.gov/nuccore/MK120201.1
MK120202.1	2007	Italy	Human	East-Central-South-African	https://www.ncbi.nlm.nih.gov/nuccore/MK120202.1
MK121891.1	2015	Brazil	Human	East-Central-South-African	https://www.ncbi.nlm.nih.gov/nuccore/MK121891.1
MK121892.1	2015	Brazil	Human	East-Central-South-African	https://www.ncbi.nlm.nih.gov/nuccore/MK121892.1
MK121893.1	2015	Brazil	Human	East-Central-South-African	https://www.ncbi.nlm.nih.gov/nuccore/MK121893.1
MK121894.1	2016	Brazil	Human	East-Central-South-African	https://www.ncbi.nlm.nih.gov/nuccore/MK121894.1
MK121895.1	2017	Brazil	Human	East-Central-South-African	https://www.ncbi.nlm.nih.gov/nuccore/MK121895.1
MK121896.1	2017	Brazil	Human	East-Central-South-African	https://www.ncbi.nlm.nih.gov/nuccore/MK121896.1
MK121898.1	2017	Brazil	Human	East-Central-South-African	https://www.ncbi.nlm.nih.gov/nuccore/MK121898.1
MK121899.1	2017	Brazil	Human	East-Central-South-African	https://www.ncbi.nlm.nih.gov/nuccore/MK121899.1
MK121900.1	2017	Brazil	Human	East-Central-South-African	https://www.ncbi.nlm.nih.gov/nuccore/MK121900.1
MK121901.1	2017	Brazil	Human	East-Central-South-African	https://www.ncbi.nlm.nih.gov/nuccore/MK121901.1
MK121902.1	2017	Brazil	Human	East-Central-South-African	https://www.ncbi.nlm.nih.gov/nuccore/MK121902.1
MK121903.1	2017	Brazil	Human	East-Central-South-African	https://www.ncbi.nlm.nih.gov/nuccore/MK121903.1
MK121904.1	2017	Brazil	Human	East-Central-South-African	https://www.ncbi.nlm.nih.gov/nuccore/MK121904.1
MK121906.1	2017	Brazil	Human	East-Central-South-African	https://www.ncbi.nlm.nih.gov/nuccore/MK121906.1
MK121907.1	2017	Brazil	Human	East-Central-South-African	https://www.ncbi.nlm.nih.gov/nuccore/MK121907.1
MK163628.1	2018	Sudan	Human	East-Central-South-African	https://www.ncbi.nlm.nih.gov/nuccore/MK163628.1
MK240311.1	2015	Mexico	Human	Asian	https://www.ncbi.nlm.nih.gov/nuccore/MK240311.1
MK286893.1	2017	India	Human	East-Central-South-African	https://www.ncbi.nlm.nih.gov/nuccore/MK286893.1
MK286894.1	2017	India	Human	East-Central-South-African	https://www.ncbi.nlm.nih.gov/nuccore/MK286894.1
MK286895.1	2014	India	Human	East-Central-South-African	https://www.ncbi.nlm.nih.gov/nuccore/MK286895.1
MK286896.1	2017	India	Human	East-Central-South-African	https://www.ncbi.nlm.nih.gov/nuccore/MK286896.1
MK286897.1	2018	India	Human	East-Central-South-African	https://www.ncbi.nlm.nih.gov/nuccore/MK286897.1
MK286898.1	2018	India	Human	East-Central-South-African	https://www.ncbi.nlm.nih.gov/nuccore/MK286898.1
MK286899.1	2017	India	Human	East-Central-South-African	https://www.ncbi.nlm.nih.gov/nuccore/MK286899.1
MK370030.1	2015	India	Human	East-Central-South-African	https://www.ncbi.nlm.nih.gov/nuccore/MK370030.1
MK370031.1	2015	India	Human	East-Central-South-African	https://www.ncbi.nlm.nih.gov/nuccore/MK370031.1
MK370032.1	2016	India	Human	East-Central-South-African	https://www.ncbi.nlm.nih.gov/nuccore/MK370032.1
MK370033.1	2016	India	Human	East-Central-South-African	https://www.ncbi.nlm.nih.gov/nuccore/MK370033.1
MK468608.1	2017	Bangladesh	Human	East-Central-South-African	https://www.ncbi.nlm.nih.gov/nuccore/MK468608.1
MK468609.1	2017	Bangladesh	Human	East-Central-South-African	https://www.ncbi.nlm.nih.gov/nuccore/MK468609.1
MK468610.1	2017	Bangladesh	Human	East-Central-South-African	https://www.ncbi.nlm.nih.gov/nuccore/MK468610.1
MK468611.1	2017	Bangladesh	Human	East-Central-South-African	https://www.ncbi.nlm.nih.gov/nuccore/MK468611.1
MK468612.1	2017	Bangladesh	Human	East-Central-South-African	https://www.ncbi.nlm.nih.gov/nuccore/MK468612.1
MK468613.1	2017	Bangladesh	Human	East-Central-South-African	https://www.ncbi.nlm.nih.gov/nuccore/MK468613.1
MK468615.1	2017	Bangladesh	Human	East-Central-South-African	https://www.ncbi.nlm.nih.gov/nuccore/MK468615.1
MK468617.1	2017	Bangladesh	Human	East-Central-South-African	https://www.ncbi.nlm.nih.gov/nuccore/MK468617.1
MK468618.1	2017	Bangladesh	Human	East-Central-South-African	https://www.ncbi.nlm.nih.gov/nuccore/MK468618.1
MK468619.1	2017	Bangladesh	Human	East-Central-South-African	https://www.ncbi.nlm.nih.gov/nuccore/MK468619.1
MK468620.1	2017	Bangladesh	Human	East-Central-South-African	https://www.ncbi.nlm.nih.gov/nuccore/MK468620.1
MK468621.1	2017	Bangladesh	Human	East-Central-South-African	https://www.ncbi.nlm.nih.gov/nuccore/MK468621.1
MK468622.1	2017	Bangladesh	Human	East-Central-South-African	https://www.ncbi.nlm.nih.gov/nuccore/MK468622.1
MK468627.1	2017	Bangladesh	Human	East-Central-South-African	https://www.ncbi.nlm.nih.gov/nuccore/MK468627.1
MK468801.1	2018	Thailand	Human	East-Central-South-African	https://www.ncbi.nlm.nih.gov/nuccore/MK468801.1
MK473621.1	2016	India	Human	East-Central-South-African	https://www.ncbi.nlm.nih.gov/nuccore/MK473621.1
MK473622.1	2016	India	Human	East-Central-South-African	https://www.ncbi.nlm.nih.gov/nuccore/MK473622.1
MK473623.1	2016	India	Human	East-Central-South-African	https://www.ncbi.nlm.nih.gov/nuccore/MK473623.1
MK473624.1	2016	India	Human	East-Central-South-African	https://www.ncbi.nlm.nih.gov/nuccore/MK473624.1
MK473625.1	2016	India	Human	East-Central-South-African	https://www.ncbi.nlm.nih.gov/nuccore/MK473625.1
MK473626.1	2016	India	Human	East-Central-South-African	https://www.ncbi.nlm.nih.gov/nuccore/MK473626.1
MK473627.1	2016	India	Human	East-Central-South-African	https://www.ncbi.nlm.nih.gov/nuccore/MK473627.1
MK473628.1	2016	India	Human	East-Central-South-African	https://www.ncbi.nlm.nih.gov/nuccore/MK473628.1
MK473629.1	2016	India	Human	East-Central-South-African	https://www.ncbi.nlm.nih.gov/nuccore/MK473629.1
MK473630.1	2016	India	Human	East-Central-South-African	https://www.ncbi.nlm.nih.gov/nuccore/MK473630.1
MK473631.1	2016	India	Human	East-Central-South-African	https://www.ncbi.nlm.nih.gov/nuccore/MK473631.1
MK473632.1	2016	India	Human	East-Central-South-African	https://www.ncbi.nlm.nih.gov/nuccore/MK473632.1
MK518340.1	2016	India	Human	East-Central-South-African	https://www.ncbi.nlm.nih.gov/nuccore/MK518340.1
MK518395.1	2017	Brazil	Mosquito	East-Central-South-African	https://www.ncbi.nlm.nih.gov/nuccore/MK518395.1
MK551552.1	2016	India	Human	East-Central-South-African	https://www.ncbi.nlm.nih.gov/nuccore/MK551552.1
MK551553.1	2016	India	Human	East-Central-South-African	https://www.ncbi.nlm.nih.gov/nuccore/MK551553.1
MK690206.1	2019	Republic of the Congo	Human	East-Central-South-African	https://www.ncbi.nlm.nih.gov/nuccore/MK690206.1
MK848202.1	2018	Thailand	Human	East-Central-South-African	https://www.ncbi.nlm.nih.gov/nuccore/MK848202.1
MK935343.1	2019	Democratic Republic of the Congo	Human	East-Central-South-African	https://www.ncbi.nlm.nih.gov/nuccore/MK935343.1
MK935344.1	2019	Democratic Republic of the Congo	Human	East-Central-South-African	https://www.ncbi.nlm.nih.gov/nuccore/MK935344.1
MK993756.1	2016	Brazil	Human	East-Central-South-African	https://www.ncbi.nlm.nih.gov/nuccore/MK993756.1
MK993757.1	2016	Brazil	Human	East-Central-South-African	https://www.ncbi.nlm.nih.gov/nuccore/MK993757.1
MN075149.1	2019	Finland	Human	East-Central-South-African	https://www.ncbi.nlm.nih.gov/nuccore/MN075149.1
MN158171.1	2009	South Korea	Human	East-Central-South-African	https://www.ncbi.nlm.nih.gov/nuccore/MN158171.1
MN271692.1	2018	Nicaragua	Mosquito	East-Central-South-African	https://www.ncbi.nlm.nih.gov/nuccore/MN271692.1
MN402883.1	2019	China	Human	East-Central-South-African	https://www.ncbi.nlm.nih.gov/nuccore/MN402883.1
MN402884.1	2019	China	Human	East-Central-South-African	https://www.ncbi.nlm.nih.gov/nuccore/MN402884.1
MN402885.1	2019	China	Human	East-Central-South-African	https://www.ncbi.nlm.nih.gov/nuccore/MN402885.1
MN402886.1	2019	China	Human	East-Central-South-African	https://www.ncbi.nlm.nih.gov/nuccore/MN402886.1
MN402887.1	2019	Myanmar	Human	East-Central-South-African	https://www.ncbi.nlm.nih.gov/nuccore/MN402887.1
MN402888.1	2019	Myanmar	Human	East-Central-South-African	https://www.ncbi.nlm.nih.gov/nuccore/MN402888.1
MN402889.1	2019	China	Human	East-Central-South-African	https://www.ncbi.nlm.nih.gov/nuccore/MN402889.1
MN402890.1	2019	China	Human	East-Central-South-African	https://www.ncbi.nlm.nih.gov/nuccore/MN402890.1
MN402891.1	2019	China	Human	East-Central-South-African	https://www.ncbi.nlm.nih.gov/nuccore/MN402891.1
MN402892.1	2019	China	Human	East-Central-South-African	https://www.ncbi.nlm.nih.gov/nuccore/MN402892.1
MN428504.1	2018	Brazil	Human	East-Central-South-African	https://www.ncbi.nlm.nih.gov/nuccore/MN428504.1
MN428511.1	2018	Brazil	Human	East-Central-South-African	https://www.ncbi.nlm.nih.gov/nuccore/MN428511.1
MN428515.1	2018	Brazil	Human	East-Central-South-African	https://www.ncbi.nlm.nih.gov/nuccore/MN428515.1
MN428523.1	2018	Brazil	Human	East-Central-South-African	https://www.ncbi.nlm.nih.gov/nuccore/MN428523.1
MN428525.1	2018	Brazil	Human	East-Central-South-African	https://www.ncbi.nlm.nih.gov/nuccore/MN428525.1
MN462638.1	2015	Ecuador	Human	Asian	https://www.ncbi.nlm.nih.gov/nuccore/MN462638.1
MN462639.1	2015	Ecuador	Human	Asian	https://www.ncbi.nlm.nih.gov/nuccore/MN462639.1
MN462640.1	2015	Ecuador	Human	Asian	https://www.ncbi.nlm.nih.gov/nuccore/MN462640.1
MN462641.1	2015	Ecuador	Human	Asian	https://www.ncbi.nlm.nih.gov/nuccore/MN462641.1
MN462642.1	2015	Ecuador	Human	Asian	https://www.ncbi.nlm.nih.gov/nuccore/MN462642.1
MN462643.1	2015	Ecuador	Human	Asian	https://www.ncbi.nlm.nih.gov/nuccore/MN462643.1
MN462644.1	2015	Ecuador	Human	Asian	https://www.ncbi.nlm.nih.gov/nuccore/MN462644.1
MN462645.1	2015	Ecuador	Human	Asian	https://www.ncbi.nlm.nih.gov/nuccore/MN462645.1
MN462646.1	2015	Ecuador	Human	Asian	https://www.ncbi.nlm.nih.gov/nuccore/MN462646.1
MN462647.1	2015	Ecuador	Human	Asian	https://www.ncbi.nlm.nih.gov/nuccore/MN462647.1
MN462648.1	2015	Ecuador	Human	Asian	https://www.ncbi.nlm.nih.gov/nuccore/MN462648.1
MN462649.1	2015	Ecuador	Human	Asian	https://www.ncbi.nlm.nih.gov/nuccore/MN462649.1
MN462650.1	2015	Ecuador	Human	Asian	https://www.ncbi.nlm.nih.gov/nuccore/MN462650.1
MN462651.1	2015	Ecuador	Human	Asian	https://www.ncbi.nlm.nih.gov/nuccore/MN462651.1
MN462652.1	2015	Ecuador	Human	Asian	https://www.ncbi.nlm.nih.gov/nuccore/MN462652.1
MN462653.1	2015	Ecuador	Human	Asian	https://www.ncbi.nlm.nih.gov/nuccore/MN462653.1
MN462654.1	2015	Ecuador	Human	Asian	https://www.ncbi.nlm.nih.gov/nuccore/MN462654.1
MN462655.1	2015	Ecuador	Human	Asian	https://www.ncbi.nlm.nih.gov/nuccore/MN462655.1
MN462656.1	2015	Ecuador	Human	Asian	https://www.ncbi.nlm.nih.gov/nuccore/MN462656.1
MN462657.1	2015	Ecuador	Human	Asian	https://www.ncbi.nlm.nih.gov/nuccore/MN462657.1
MN462658.1	2015	Ecuador	Human	Asian	https://www.ncbi.nlm.nih.gov/nuccore/MN462658.1
MN462659.1	2015	Ecuador	Human	Asian	https://www.ncbi.nlm.nih.gov/nuccore/MN462659.1
MN462660.1	2015	Ecuador	Human	Asian	https://www.ncbi.nlm.nih.gov/nuccore/MN462660.1
MN462661.1	2015	Ecuador	Human	Asian	https://www.ncbi.nlm.nih.gov/nuccore/MN462661.1
MN462662.1	2015	Ecuador	Human	Asian	https://www.ncbi.nlm.nih.gov/nuccore/MN462662.1
MN630017.1	2019	Thailand	Human	East-Central-South-African	https://www.ncbi.nlm.nih.gov/nuccore/MN630017.1
MN756625.1	2019	China	Human	East-Central-South-African	https://www.ncbi.nlm.nih.gov/nuccore/MN756625.1
MN783352.1	2016	Brazil	Human	East-Central-South-African	https://www.ncbi.nlm.nih.gov/nuccore/MN783352.1
MN783353.1	2016	Brazil	Human	East-Central-South-African	https://www.ncbi.nlm.nih.gov/nuccore/MN783353.1
MN871956.1	2019	Taiwan	Human	East-Central-South-African	https://www.ncbi.nlm.nih.gov/nuccore/MN871956.1
MN871958.1	2019	Taiwan	Human	East-Central-South-African	https://www.ncbi.nlm.nih.gov/nuccore/MN871958.1
MN871959.1	2019	Taiwan	Human	East-Central-South-African	https://www.ncbi.nlm.nih.gov/nuccore/MN871959.1
MN871962.1	2019	Taiwan	Human	East-Central-South-African	https://www.ncbi.nlm.nih.gov/nuccore/MN871962.1
MN871965.1	2019	Myanmar	Human	East-Central-South-African	https://www.ncbi.nlm.nih.gov/nuccore/MN871965.1
MN871966.1	2019	Myanmar	Human	East-Central-South-African	https://www.ncbi.nlm.nih.gov/nuccore/MN871966.1
MN871967.1	2019	Myanmar	Human	East-Central-South-African	https://www.ncbi.nlm.nih.gov/nuccore/MN871967.1
MN871969.1	2019	Myanmar	Human	East-Central-South-African	https://www.ncbi.nlm.nih.gov/nuccore/MN871969.1
MN871970.1	2019	Myanmar	Human	East-Central-South-African	https://www.ncbi.nlm.nih.gov/nuccore/MN871970.1
MN871971.1	2019	Thailand	Human	East-Central-South-African	https://www.ncbi.nlm.nih.gov/nuccore/MN871971.1
MN871972.1	2019	Thailand	Human	East-Central-South-African	https://www.ncbi.nlm.nih.gov/nuccore/MN871972.1
MN871973.1	2019	Thailand	Human	East-Central-South-African	https://www.ncbi.nlm.nih.gov/nuccore/MN871973.1
MN871974.1	2019	Thailand	Human	East-Central-South-African	https://www.ncbi.nlm.nih.gov/nuccore/MN871974.1
MN871975.1	2019	Malaysia	Human	East-Central-South-African	https://www.ncbi.nlm.nih.gov/nuccore/MN871975.1
MN954552.1	2019	India	Mosquito	East-Central-South-African	https://www.ncbi.nlm.nih.gov/nuccore/MN954552.1
MN974203.1	2019	Thailand	Human	East-Central-South-African	https://www.ncbi.nlm.nih.gov/nuccore/MN974203.1
MN974204.1	2019	Thailand	Human	East-Central-South-African	https://www.ncbi.nlm.nih.gov/nuccore/MN974204.1
MN974205.1	2019	Thailand	Human	East-Central-South-African	https://www.ncbi.nlm.nih.gov/nuccore/MN974205.1
MN974206.1	2019	Thailand	Human	East-Central-South-African	https://www.ncbi.nlm.nih.gov/nuccore/MN974206.1
MN974207.1	2019	Thailand	Human	East-Central-South-African	https://www.ncbi.nlm.nih.gov/nuccore/MN974207.1
MN974208.1	2019	Thailand	Human	East-Central-South-African	https://www.ncbi.nlm.nih.gov/nuccore/MN974208.1
MN974209.1	2019	Thailand	Human	East-Central-South-African	https://www.ncbi.nlm.nih.gov/nuccore/MN974209.1
MN974210.1	2019	Thailand	Human	East-Central-South-African	https://www.ncbi.nlm.nih.gov/nuccore/MN974210.1
MN974211.1	2018	Thailand	Human	East-Central-South-African	https://www.ncbi.nlm.nih.gov/nuccore/MN974211.1
MN974212.1	2019	Thailand	Human	East-Central-South-African	https://www.ncbi.nlm.nih.gov/nuccore/MN974212.1
MN974213.1	2019	Thailand	Human	East-Central-South-African	https://www.ncbi.nlm.nih.gov/nuccore/MN974213.1
MN974214.1	2018	Thailand	Human	East-Central-South-African	https://www.ncbi.nlm.nih.gov/nuccore/MN974214.1
MN974215.1	2018	Thailand	Human	East-Central-South-African	https://www.ncbi.nlm.nih.gov/nuccore/MN974215.1
MN974216.1	2018	Thailand	Human	East-Central-South-African	https://www.ncbi.nlm.nih.gov/nuccore/MN974216.1
MN974217.1	2018	Thailand	Human	East-Central-South-African	https://www.ncbi.nlm.nih.gov/nuccore/MN974217.1
MN974218.1	2018	Thailand	Human	East-Central-South-African	https://www.ncbi.nlm.nih.gov/nuccore/MN974218.1
MN974219.1	2018	Thailand	Human	East-Central-South-African	https://www.ncbi.nlm.nih.gov/nuccore/MN974219.1
MN974220.1	2018	Thailand	Human	East-Central-South-African	https://www.ncbi.nlm.nih.gov/nuccore/MN974220.1
MN974221.1	2018	Thailand	Human	East-Central-South-African	https://www.ncbi.nlm.nih.gov/nuccore/MN974221.1
MN974222.1	2018	Thailand	Human	East-Central-South-African	https://www.ncbi.nlm.nih.gov/nuccore/MN974222.1
MN974223.1	2018	Thailand	Human	East-Central-South-African	https://www.ncbi.nlm.nih.gov/nuccore/MN974223.1
MN974224.1	2019	Thailand	Human	East-Central-South-African	https://www.ncbi.nlm.nih.gov/nuccore/MN974224.1
MT023791.1	2019	Djibouti	Human	East-Central-South-African	https://www.ncbi.nlm.nih.gov/nuccore/MT023791.1
MT123008.1	2017	China	Human	East-Central-South-African	https://www.ncbi.nlm.nih.gov/nuccore/MT123008.1
MT123009.1	2017	China	Human	East-Central-South-African	https://www.ncbi.nlm.nih.gov/nuccore/MT123009.1
MT123010.1	2017	China	Human	East-Central-South-African	https://www.ncbi.nlm.nih.gov/nuccore/MT123010.1
MT150092.1	2015	Bolivia	Human	Asian	https://www.ncbi.nlm.nih.gov/nuccore/MT150092.1
MT150093.1	2015	Bolivia	Human	Asian	https://www.ncbi.nlm.nih.gov/nuccore/MT150093.1
MT150094.1	2015	Bolivia	Human	Asian	https://www.ncbi.nlm.nih.gov/nuccore/MT150094.1
MT150095.1	2015	Bolivia	Human	Asian	https://www.ncbi.nlm.nih.gov/nuccore/MT150095.1
MT150096.1	2015	Bolivia	Human	Asian	https://www.ncbi.nlm.nih.gov/nuccore/MT150096.1
MT150097.1	2015	Bolivia	Human	Asian	https://www.ncbi.nlm.nih.gov/nuccore/MT150097.1
MT150098.1	2015	Bolivia	Human	Asian	https://www.ncbi.nlm.nih.gov/nuccore/MT150098.1
MT150099.1	2015	Bolivia	Human	Asian	https://www.ncbi.nlm.nih.gov/nuccore/MT150099.1
MT150100.1	2015	Bolivia	Human	Asian	https://www.ncbi.nlm.nih.gov/nuccore/MT150100.1
MT228631.1	2013	Saint Martin	Human	Asian	https://www.ncbi.nlm.nih.gov/nuccore/MT228631.1
MT228632.1	2013	Saint Martin	Human	Asian	https://www.ncbi.nlm.nih.gov/nuccore/MT228632.1
MT228633.1	2013	Saint Martin	Human	Asian	https://www.ncbi.nlm.nih.gov/nuccore/MT228633.1
MT349960.1	2018	Brazil	Human	East-Central-South-African	https://www.ncbi.nlm.nih.gov/nuccore/MT349960.1
MT380146.1	2018	Kenya	Human	East-Central-South-African	https://www.ncbi.nlm.nih.gov/nuccore/MT380146.1
MT380147.1	2018	Kenya	Human	East-Central-South-African	https://www.ncbi.nlm.nih.gov/nuccore/MT380147.1
MT380148.1	2018	Kenya	Human	East-Central-South-African	https://www.ncbi.nlm.nih.gov/nuccore/MT380148.1
MT380149.1	2018	Kenya	Human	East-Central-South-African	https://www.ncbi.nlm.nih.gov/nuccore/MT380149.1
MT380150.1	2018	Kenya	Human	East-Central-South-African	https://www.ncbi.nlm.nih.gov/nuccore/MT380150.1
MT380151.1	2018	Kenya	Human	East-Central-South-African	https://www.ncbi.nlm.nih.gov/nuccore/MT380151.1
MT380152.1	2018	Kenya	Human	East-Central-South-African	https://www.ncbi.nlm.nih.gov/nuccore/MT380152.1
MT380153.1	2018	Kenya	Human	East-Central-South-African	https://www.ncbi.nlm.nih.gov/nuccore/MT380153.1
MT380154.1	2018	Kenya	Human	East-Central-South-African	https://www.ncbi.nlm.nih.gov/nuccore/MT380154.1
MT380155.1	2018	Kenya	Human	East-Central-South-African	https://www.ncbi.nlm.nih.gov/nuccore/MT380155.1
MT380156.1	2018	Kenya	Human	East-Central-South-African	https://www.ncbi.nlm.nih.gov/nuccore/MT380156.1
MT380157.1	2018	Kenya	Human	East-Central-South-African	https://www.ncbi.nlm.nih.gov/nuccore/MT380157.1
MT380158.1	2018	Kenya	Human	East-Central-South-African	https://www.ncbi.nlm.nih.gov/nuccore/MT380158.1
MT380160.1	2018	Kenya	Human	East-Central-South-African	https://www.ncbi.nlm.nih.gov/nuccore/MT380160.1
MT380161.1	2017	Kenya	Human	East-Central-South-African	https://www.ncbi.nlm.nih.gov/nuccore/MT380161.1
MT495605.1	2019	Thailand	Human	East-Central-South-African	https://www.ncbi.nlm.nih.gov/nuccore/MT495605.1
MT495606.1	2019	Thailand	Human	East-Central-South-African	https://www.ncbi.nlm.nih.gov/nuccore/MT495606.1
MT495607.1	2019	Thailand	Human	East-Central-South-African	https://www.ncbi.nlm.nih.gov/nuccore/MT495607.1
MT495608.1	2019	Thailand	Human	East-Central-South-African	https://www.ncbi.nlm.nih.gov/nuccore/MT495608.1
MT526796.1	2018	Kenya	Human	East-Central-South-African	https://www.ncbi.nlm.nih.gov/nuccore/MT526796.1
MT526798.1	2018	Kenya	Human	East-Central-South-African	https://www.ncbi.nlm.nih.gov/nuccore/MT526798.1
MT526799.1	2018	Kenya	Human	East-Central-South-African	https://www.ncbi.nlm.nih.gov/nuccore/MT526799.1
MT526800.1	2017	Kenya	Human	East-Central-South-African	https://www.ncbi.nlm.nih.gov/nuccore/MT526800.1
MT526802.1	2014	Kenya	Human	East-Central-South-African	https://www.ncbi.nlm.nih.gov/nuccore/MT526802.1
MT526804.1	2017	Kenya	Human	East-Central-South-African	https://www.ncbi.nlm.nih.gov/nuccore/MT526804.1
MT526805.1	2017	Kenya	Human	East-Central-South-African	https://www.ncbi.nlm.nih.gov/nuccore/MT526805.1
MT526806.1	2017	Kenya	Human	East-Central-South-African	https://www.ncbi.nlm.nih.gov/nuccore/MT526806.1
MT526807.1	2016	Kenya	Human	East-Central-South-African	https://www.ncbi.nlm.nih.gov/nuccore/MT526807.1
MT526900.1	2017	Brazil	Mosquito	East-Central-South-African	https://www.ncbi.nlm.nih.gov/nuccore/MT526900.1
MT526901.1	2017	Brazil	Mosquito	East-Central-South-African	https://www.ncbi.nlm.nih.gov/nuccore/MT526901.1
MT526902.1	2017	Brazil	Mosquito	East-Central-South-African	https://www.ncbi.nlm.nih.gov/nuccore/MT526902.1
MT526903.1	2017	Brazil	Mosquito	East-Central-South-African	https://www.ncbi.nlm.nih.gov/nuccore/MT526903.1
MT526904.1	2017	Brazil	Mosquito	East-Central-South-African	https://www.ncbi.nlm.nih.gov/nuccore/MT526904.1
MT591083.1	2015	Indonesia	Human	Asian	https://www.ncbi.nlm.nih.gov/nuccore/MT591083.1
MT591085.1	2014	Indonesia	Human	Asian	https://www.ncbi.nlm.nih.gov/nuccore/MT591085.1
MT591086.1	2016	Indonesia	Human	Asian	https://www.ncbi.nlm.nih.gov/nuccore/MT591086.1
MT591087.1	2016	Indonesia	Human	Asian	https://www.ncbi.nlm.nih.gov/nuccore/MT591087.1
MT591088.1	2016	Indonesia	Human	Asian	https://www.ncbi.nlm.nih.gov/nuccore/MT591088.1
MT591089.1	2016	Indonesia	Human	Asian	https://www.ncbi.nlm.nih.gov/nuccore/MT591089.1
MT591090.1	2017	Indonesia	Human	Asian	https://www.ncbi.nlm.nih.gov/nuccore/MT591090.1
MT591091.1	2017	Indonesia	Human	Asian	https://www.ncbi.nlm.nih.gov/nuccore/MT591091.1
MT591092.1	2015	Indonesia	Human	Asian	https://www.ncbi.nlm.nih.gov/nuccore/MT591092.1
MT591093.1	2015	Indonesia	Human	Asian	https://www.ncbi.nlm.nih.gov/nuccore/MT591093.1
MT591094.1	2015	Indonesia	Human	Asian	https://www.ncbi.nlm.nih.gov/nuccore/MT591094.1
MT591095.1	2015	Indonesia	Human	Asian	https://www.ncbi.nlm.nih.gov/nuccore/MT591095.1
MT591096.1	2015	Indonesia	Human	Asian	https://www.ncbi.nlm.nih.gov/nuccore/MT591096.1
MT591097.1	2015	Indonesia	Human	Asian	https://www.ncbi.nlm.nih.gov/nuccore/MT591097.1
MT591098.1	2015	Indonesia	Human	Asian	https://www.ncbi.nlm.nih.gov/nuccore/MT591098.1
MT591099.1	2015	Indonesia	Human	Asian	https://www.ncbi.nlm.nih.gov/nuccore/MT591099.1
MT591100.1	2015	Indonesia	Human	Asian	https://www.ncbi.nlm.nih.gov/nuccore/MT591100.1
MT591102.1	2015	Indonesia	Human	Asian	https://www.ncbi.nlm.nih.gov/nuccore/MT591102.1
MT591103.1	2015	Indonesia	Human	Asian	https://www.ncbi.nlm.nih.gov/nuccore/MT591103.1
MT591104.1	2017	Indonesia	Human	Asian	https://www.ncbi.nlm.nih.gov/nuccore/MT591104.1
MT591105.1	2018	Indonesia	Human	Asian	https://www.ncbi.nlm.nih.gov/nuccore/MT591105.1
MT591106.1	2018	Indonesia	Human	Asian	https://www.ncbi.nlm.nih.gov/nuccore/MT591106.1
MT591107.1	2018	Indonesia	Human	Asian	https://www.ncbi.nlm.nih.gov/nuccore/MT591107.1
MT636907.1	2019	Democratic Republic of the Congo	Human	East-Central-South-African	https://www.ncbi.nlm.nih.gov/nuccore/MT636907.1
MT636908.1	2019	Democratic Republic of the Congo	Human	East-Central-South-African	https://www.ncbi.nlm.nih.gov/nuccore/MT636908.1
MT636909.1	2019	Democratic Republic of the Congo	Human	East-Central-South-African	https://www.ncbi.nlm.nih.gov/nuccore/MT636909.1
MT636910.1	2019	Democratic Republic of the Congo	Human	East-Central-South-African	https://www.ncbi.nlm.nih.gov/nuccore/MT636910.1
MT636911.1	2019	Democratic Republic of the Congo	Human	East-Central-South-African	https://www.ncbi.nlm.nih.gov/nuccore/MT636911.1
MT636912.1	2019	Democratic Republic of the Congo	Human	East-Central-South-African	https://www.ncbi.nlm.nih.gov/nuccore/MT636912.1
MT636913.1	2019	Democratic Republic of the Congo	Human	East-Central-South-African	https://www.ncbi.nlm.nih.gov/nuccore/MT636913.1
MT636914.1	2019	Democratic Republic of the Congo	Human	East-Central-South-African	https://www.ncbi.nlm.nih.gov/nuccore/MT636914.1
MT636915.1	2019	Democratic Republic of the Congo	Human	East-Central-South-African	https://www.ncbi.nlm.nih.gov/nuccore/MT636915.1
MT636917.1	2019	Democratic Republic of the Congo	Human	East-Central-South-African	https://www.ncbi.nlm.nih.gov/nuccore/MT636917.1
MT636918.1	2019	Democratic Republic of the Congo	Human	East-Central-South-African	https://www.ncbi.nlm.nih.gov/nuccore/MT636918.1
MT636919.1	2019	Democratic Republic of the Congo	Human	East-Central-South-African	https://www.ncbi.nlm.nih.gov/nuccore/MT636919.1
MT636920.1	2019	Democratic Republic of the Congo	Human	East-Central-South-African	https://www.ncbi.nlm.nih.gov/nuccore/MT636920.1
MT640255.1	2020	Thailand	Human	East-Central-South-African	https://www.ncbi.nlm.nih.gov/nuccore/MT640255.1
MT640256.1	2020	Thailand	Human	East-Central-South-African	https://www.ncbi.nlm.nih.gov/nuccore/MT640256.1
MT666071.1	2018	Cameroon	Human	East-Central-South-African	https://www.ncbi.nlm.nih.gov/nuccore/MT666071.1
MT666072.1	2016	Cameroon	Human	East-Central-South-African	https://www.ncbi.nlm.nih.gov/nuccore/MT666072.1
MT666073.1	2018	Cameroon	Human	East-Central-South-African	https://www.ncbi.nlm.nih.gov/nuccore/MT666073.1
MT668625.1	2019	China	Human	East-Central-South-African	https://www.ncbi.nlm.nih.gov/nuccore/MT668625.1
MT877211.1	2017	Brazil	Human	East-Central-South-African	https://www.ncbi.nlm.nih.gov/nuccore/MT877211.1
MT933030.1	2019	Brazil	Human	East-Central-South-African	https://www.ncbi.nlm.nih.gov/nuccore/MT933030.1
MT933032.1	2019	Brazil	Human	East-Central-South-African	https://www.ncbi.nlm.nih.gov/nuccore/MT933032.1
MT933033.1	2019	Brazil	Human	East-Central-South-African	https://www.ncbi.nlm.nih.gov/nuccore/MT933033.1
MT933034.1	2019	Brazil	Human	East-Central-South-African	https://www.ncbi.nlm.nih.gov/nuccore/MT933034.1
MT933035.1	2019	Brazil	Human	East-Central-South-African	https://www.ncbi.nlm.nih.gov/nuccore/MT933035.1
MT933036.1	2019	Brazil	Human	East-Central-South-African	https://www.ncbi.nlm.nih.gov/nuccore/MT933036.1
MT933037.1	2019	Brazil	Human	East-Central-South-African	https://www.ncbi.nlm.nih.gov/nuccore/MT933037.1
MT933038.1	2019	Brazil	Human	East-Central-South-African	https://www.ncbi.nlm.nih.gov/nuccore/MT933038.1
MT933039.1	2019	Brazil	Human	East-Central-South-African	https://www.ncbi.nlm.nih.gov/nuccore/MT933039.1
MT933041.1	2019	Brazil	Human	East-Central-South-African	https://www.ncbi.nlm.nih.gov/nuccore/MT933041.1
MT933042.1	2019	Brazil	Human	East-Central-South-African	https://www.ncbi.nlm.nih.gov/nuccore/MT933042.1
MT933043.1	2019	Brazil	Human	East-Central-South-African	https://www.ncbi.nlm.nih.gov/nuccore/MT933043.1
MT933044.1	2019	Brazil	Human	East-Central-South-African	https://www.ncbi.nlm.nih.gov/nuccore/MT933044.1
MT933045.1	2019	Brazil	Human	East-Central-South-African	https://www.ncbi.nlm.nih.gov/nuccore/MT933045.1
MT933046.1	2019	Brazil	Human	East-Central-South-African	https://www.ncbi.nlm.nih.gov/nuccore/MT933046.1
MT933047.1	2019	Brazil	Human	East-Central-South-African	https://www.ncbi.nlm.nih.gov/nuccore/MT933047.1
MT933049.1	2019	Brazil	Human	East-Central-South-African	https://www.ncbi.nlm.nih.gov/nuccore/MT933049.1
MT933050.1	2019	Brazil	Human	East-Central-South-African	https://www.ncbi.nlm.nih.gov/nuccore/MT933050.1
MT933051.1	2019	Brazil	Human	East-Central-South-African	https://www.ncbi.nlm.nih.gov/nuccore/MT933051.1
MW042254.1	2014	India	Human	East-Central-South-African	https://www.ncbi.nlm.nih.gov/nuccore/MW042254.1
MW110472.1	2019	China	Human	East-Central-South-African	https://www.ncbi.nlm.nih.gov/nuccore/MW110472.1
MW110474.1	2019	China	Human	East-Central-South-African	https://www.ncbi.nlm.nih.gov/nuccore/MW110474.1
MW110475.1	2019	China	Human	East-Central-South-African	https://www.ncbi.nlm.nih.gov/nuccore/MW110475.1
MW110477.1	2019	China	Human	East-Central-South-African	https://www.ncbi.nlm.nih.gov/nuccore/MW110477.1
MW248363.1	2019	China	Human	East-Central-South-African	https://www.ncbi.nlm.nih.gov/nuccore/MW248363.1
MW248364.1	2019	China	Human	East-Central-South-African	https://www.ncbi.nlm.nih.gov/nuccore/MW248364.1
MW260512.1	2019	Brazil	Human	East-Central-South-African	https://www.ncbi.nlm.nih.gov/nuccore/MW260512.1
MW260513.1	2019	Brazil	Human	East-Central-South-African	https://www.ncbi.nlm.nih.gov/nuccore/MW260513.1
MW260514.1	2019	Brazil	Human	East-Central-South-African	https://www.ncbi.nlm.nih.gov/nuccore/MW260514.1
MW260515.1	2019	Brazil	Human	East-Central-South-African	https://www.ncbi.nlm.nih.gov/nuccore/MW260515.1
MW260516.1	2019	Brazil	Human	East-Central-South-African	https://www.ncbi.nlm.nih.gov/nuccore/MW260516.1
MW260517.1	2019	Brazil	Human	East-Central-South-African	https://www.ncbi.nlm.nih.gov/nuccore/MW260517.1
MW260518.1	2019	Brazil	Human	East-Central-South-African	https://www.ncbi.nlm.nih.gov/nuccore/MW260518.1
MW260519.1	2019	Brazil	Human	East-Central-South-African	https://www.ncbi.nlm.nih.gov/nuccore/MW260519.1
MW281311.1	2017	France	Human	East-Central-South-African	https://www.ncbi.nlm.nih.gov/nuccore/MW281311.1
MW291576.1	2019	China	Human	East-Central-South-African	https://www.ncbi.nlm.nih.gov/nuccore/MW291576.1
MW321606.1	2016	India	Human	East-Central-South-African	https://www.ncbi.nlm.nih.gov/nuccore/MW321606.1
MW349426.1	2020	Thailand	Human	East-Central-South-African	https://www.ncbi.nlm.nih.gov/nuccore/MW349426.1
MW473668.1	2018	USA		Asian	https://www.ncbi.nlm.nih.gov/nuccore/MW473668.1
MW557660.1	2020	Malaysia	Human	East-Central-South-African	https://www.ncbi.nlm.nih.gov/nuccore/MW557660.1
MW557661.1	2020	Malaysia	Human	East-Central-South-African	https://www.ncbi.nlm.nih.gov/nuccore/MW557661.1
MW574902.1	2016	India	Human	East-Central-South-African	https://www.ncbi.nlm.nih.gov/nuccore/MW574902.1
MW581864.1	2011	India	Human	East-Central-South-African	https://www.ncbi.nlm.nih.gov/nuccore/MW581864.1
MW581867.1	2012	India	Human	East-Central-South-African	https://www.ncbi.nlm.nih.gov/nuccore/MW581867.1
MW581868.1	2010	India	Human	East-Central-South-African	https://www.ncbi.nlm.nih.gov/nuccore/MW581868.1
MW581869.1	2013	India	Human	East-Central-South-African	https://www.ncbi.nlm.nih.gov/nuccore/MW581869.1
MW581870.1	2010	India	Human	East-Central-South-African	https://www.ncbi.nlm.nih.gov/nuccore/MW581870.1
MW581871.1	2011	India	Human	East-Central-South-African	https://www.ncbi.nlm.nih.gov/nuccore/MW581871.1
MW581872.1	2011	India	Human	East-Central-South-African	https://www.ncbi.nlm.nih.gov/nuccore/MW581872.1
MW581873.1	2012	India	Human	East-Central-South-African	https://www.ncbi.nlm.nih.gov/nuccore/MW581873.1
MW581874.1	2012	India	Human	East-Central-South-African	https://www.ncbi.nlm.nih.gov/nuccore/MW581874.1
MW581875.1	2012	India	Human	East-Central-South-African	https://www.ncbi.nlm.nih.gov/nuccore/MW581875.1
MW581876.1	2012	India	Human	East-Central-South-African	https://www.ncbi.nlm.nih.gov/nuccore/MW581876.1
MW581877.1	2013	India	Human	East-Central-South-African	https://www.ncbi.nlm.nih.gov/nuccore/MW581877.1
MW581879.1	2012	India	Human	East-Central-South-African	https://www.ncbi.nlm.nih.gov/nuccore/MW581879.1
MW581881.1	2012	India	Human	East-Central-South-African	https://www.ncbi.nlm.nih.gov/nuccore/MW581881.1
MW581882.1	2013	India	Human	East-Central-South-African	https://www.ncbi.nlm.nih.gov/nuccore/MW581882.1
MW581883.1	2012	India	Human	East-Central-South-African	https://www.ncbi.nlm.nih.gov/nuccore/MW581883.1
MW588418.1	2017	Malaysia	Human	East-Central-South-African	https://www.ncbi.nlm.nih.gov/nuccore/MW588418.1
MW588419.1	2017	Malaysia	Human	East-Central-South-African	https://www.ncbi.nlm.nih.gov/nuccore/MW588419.1
MW656171.1	2015	Colombia	Human	Asian	https://www.ncbi.nlm.nih.gov/nuccore/MW656171.1
MZ292728.1	2014	Laos	Human	Asian	https://www.ncbi.nlm.nih.gov/nuccore/MZ292728.1
MZ292729.1	2019	Laos	Human	Asian	https://www.ncbi.nlm.nih.gov/nuccore/MZ292729.1
MZ292730.1	2020	Laos	Human	East-Central-South-African	https://www.ncbi.nlm.nih.gov/nuccore/MZ292730.1
MZ292731.1	2020	Laos	Human	East-Central-South-African	https://www.ncbi.nlm.nih.gov/nuccore/MZ292731.1
MZ292732.1	2020	Laos	Human	East-Central-South-African	https://www.ncbi.nlm.nih.gov/nuccore/MZ292732.1
MZ292733.1	2020	Laos	Human	East-Central-South-African	https://www.ncbi.nlm.nih.gov/nuccore/MZ292733.1
MZ443813.1	2018	Thailand	Mosquito	East-Central-South-African	https://www.ncbi.nlm.nih.gov/nuccore/MZ443813.1
MZ443814.1	2018	Thailand	Mosquito	East-Central-South-African	https://www.ncbi.nlm.nih.gov/nuccore/MZ443814.1
MZ443815.1	2018	Thailand	Mosquito	East-Central-South-African	https://www.ncbi.nlm.nih.gov/nuccore/MZ443815.1
MZ443816.1	2018	Thailand	Mosquito	East-Central-South-African	https://www.ncbi.nlm.nih.gov/nuccore/MZ443816.1
MZ703085.1	2018	Brazil	Human	East-Central-South-African	https://www.ncbi.nlm.nih.gov/nuccore/MZ703085.1
MZ703086.1	2018	Brazil	Human	East-Central-South-African	https://www.ncbi.nlm.nih.gov/nuccore/MZ703086.1
NC 004162.2			Human	East-Central-South-African	https://www.ncbi.nlm.nih.gov/nuccore/NC_004162.2
OK139083.1	2019	India	Human	East-Central-South-African	https://www.ncbi.nlm.nih.gov/nuccore/OK139083.1
OK316989.1	2019	China	Human	Asian	https://www.ncbi.nlm.nih.gov/nuccore/OK316989.1
OK316990.1	2019	China	Human	Asian	https://www.ncbi.nlm.nih.gov/nuccore/OK316990.1
OK316991.1	2019	China	Human	Asian	https://www.ncbi.nlm.nih.gov/nuccore/OK316991.1
OK316992.1	2019	China	Human	Asian	https://www.ncbi.nlm.nih.gov/nuccore/OK316992.1
OK316993.1	2019	China	Human	Asian	https://www.ncbi.nlm.nih.gov/nuccore/OK316993.1
OK316994.1	2019	China	Human	Asian	https://www.ncbi.nlm.nih.gov/nuccore/OK316994.1
OK316995.1	2019	China	Human	Asian	https://www.ncbi.nlm.nih.gov/nuccore/OK316995.1
OK316996.1	2019	China	Human	Asian	https://www.ncbi.nlm.nih.gov/nuccore/OK316996.1
OK562599.1	2018	Brazil	Human	East-Central-South-African	https://www.ncbi.nlm.nih.gov/nuccore/OK562599.1
OK562600.1	2018	Brazil	Human	East-Central-South-African	https://www.ncbi.nlm.nih.gov/nuccore/OK562600.1
OK562601.1	2018	Brazil	Human	East-Central-South-African	https://www.ncbi.nlm.nih.gov/nuccore/OK562601.1
OK562602.1	2018	Brazil	Human	East-Central-South-African	https://www.ncbi.nlm.nih.gov/nuccore/OK562602.1
OK562603.1	2018	Brazil	Human	East-Central-South-African	https://www.ncbi.nlm.nih.gov/nuccore/OK562603.1
OK655882.1	2016	Indonesia	Human	Asian	https://www.ncbi.nlm.nih.gov/nuccore/OK655882.1
OK655883.1	2016	Indonesia	Human	Asian	https://www.ncbi.nlm.nih.gov/nuccore/OK655883.1
OK655884.1	2016	Indonesia	Human	Asian	https://www.ncbi.nlm.nih.gov/nuccore/OK655884.1
OL343608.1	2015	Brazil	Human	Asian	https://www.ncbi.nlm.nih.gov/nuccore/OL343608.1
OL343609.1	2015	Brazil	Human	Asian	https://www.ncbi.nlm.nih.gov/nuccore/OL343609.1
OL343610.1	2015	Brazil	Human	Asian	https://www.ncbi.nlm.nih.gov/nuccore/OL343610.1
OL343611.1	2014	Brazil	Human	Asian	https://www.ncbi.nlm.nih.gov/nuccore/OL343611.1
OL343612.1	2014	Brazil	Human	Asian	https://www.ncbi.nlm.nih.gov/nuccore/OL343612.1
OL343613.1	2015	Brazil	Human	Asian	https://www.ncbi.nlm.nih.gov/nuccore/OL343613.1
OL343614.1	2014	Brazil	Human	Asian	https://www.ncbi.nlm.nih.gov/nuccore/OL343614.1
OL343615.1	2015	Brazil	Human	Asian	https://www.ncbi.nlm.nih.gov/nuccore/OL343615.1
OL343616.1	2015	Brazil	Human	Asian	https://www.ncbi.nlm.nih.gov/nuccore/OL343616.1
OL343617.1	2016	Brazil	Human	Asian	https://www.ncbi.nlm.nih.gov/nuccore/OL343617.1
OL589270.1	2020	Cambodia	Human	East-Central-South-African	https://www.ncbi.nlm.nih.gov/nuccore/OL589270.1
OL705486.1	2020	Cambodia	Human	East-Central-South-African	https://www.ncbi.nlm.nih.gov/nuccore/OL705486.1
OL741630.1	2020	Cambodia	Human	East-Central-South-African	https://www.ncbi.nlm.nih.gov/nuccore/OL741630.1
OL741631.1	2020	Cambodia	Human	East-Central-South-African	https://www.ncbi.nlm.nih.gov/nuccore/OL741631.1
OL741632.1	2020	Cambodia	Human	East-Central-South-African	https://www.ncbi.nlm.nih.gov/nuccore/OL741632.1
OL849990.1	2020	Cambodia	Human	East-Central-South-African	https://www.ncbi.nlm.nih.gov/nuccore/OL849990.1
OL849991.1	2020	Cambodia	Human	East-Central-South-African	https://www.ncbi.nlm.nih.gov/nuccore/OL849991.1
OL893105.1	2020	Cambodia	Human	East-Central-South-African	https://www.ncbi.nlm.nih.gov/nuccore/OL893105.1
OL893106.1	2020	Cambodia	Human	East-Central-South-African	https://www.ncbi.nlm.nih.gov/nuccore/OL893106.1
OL893107.1	2020	Cambodia	Human	East-Central-South-African	https://www.ncbi.nlm.nih.gov/nuccore/OL893107.1
OL898663.1	2021	Brazil	Human	East-Central-South-African	https://www.ncbi.nlm.nih.gov/nuccore/OL898663.1
OL898664.1	2021	Brazil	Human	East-Central-South-African	https://www.ncbi.nlm.nih.gov/nuccore/OL898664.1
OL898665.1	2021	Brazil	Human	East-Central-South-African	https://www.ncbi.nlm.nih.gov/nuccore/OL898665.1
OL898666.1	2021	Brazil	Human	East-Central-South-African	https://www.ncbi.nlm.nih.gov/nuccore/OL898666.1
OL898667.1	2021	Brazil	Human	East-Central-South-African	https://www.ncbi.nlm.nih.gov/nuccore/OL898667.1
OL898668.1	2021	Brazil	Human	East-Central-South-African	https://www.ncbi.nlm.nih.gov/nuccore/OL898668.1
OL898669.1	2021	Brazil	Human	East-Central-South-African	https://www.ncbi.nlm.nih.gov/nuccore/OL898669.1
OL898670.1	2021	Brazil	Human	East-Central-South-African	https://www.ncbi.nlm.nih.gov/nuccore/OL898670.1
OL898671.1	2021	Brazil	Human	East-Central-South-African	https://www.ncbi.nlm.nih.gov/nuccore/OL898671.1
OL898672.1	2021	Brazil	Human	East-Central-South-African	https://www.ncbi.nlm.nih.gov/nuccore/OL898672.1
OL898673.1	2021	Brazil	Human	East-Central-South-African	https://www.ncbi.nlm.nih.gov/nuccore/OL898673.1
OL898674.1	2021	Brazil	Human	East-Central-South-African	https://www.ncbi.nlm.nih.gov/nuccore/OL898674.1
OL898675.1	2020	Brazil	Human	East-Central-South-African	https://www.ncbi.nlm.nih.gov/nuccore/OL898675.1
OL898676.1	2021	Brazil	Human	East-Central-South-African	https://www.ncbi.nlm.nih.gov/nuccore/OL898676.1
OL898677.1	2021	Brazil	Human	East-Central-South-African	https://www.ncbi.nlm.nih.gov/nuccore/OL898677.1
OL898678.1	2021	Brazil	Human	East-Central-South-African	https://www.ncbi.nlm.nih.gov/nuccore/OL898678.1
OL898679.1	2021	Brazil	Human	East-Central-South-African	https://www.ncbi.nlm.nih.gov/nuccore/OL898679.1
OL898680.1	2021	Brazil	Human	East-Central-South-African	https://www.ncbi.nlm.nih.gov/nuccore/OL898680.1
OL898681.1	2021	Brazil	Human	East-Central-South-African	https://www.ncbi.nlm.nih.gov/nuccore/OL898681.1
OL898682.1	2021	Brazil	Human	East-Central-South-African	https://www.ncbi.nlm.nih.gov/nuccore/OL898682.1
OL898683.1	2021	Brazil	Human	East-Central-South-African	https://www.ncbi.nlm.nih.gov/nuccore/OL898683.1
OL898684.1	2021	Brazil	Human	East-Central-South-African	https://www.ncbi.nlm.nih.gov/nuccore/OL898684.1
OL898685.1	2021	Brazil	Human	East-Central-South-African	https://www.ncbi.nlm.nih.gov/nuccore/OL898685.1
OL898686.1	2021	Brazil	Human	East-Central-South-African	https://www.ncbi.nlm.nih.gov/nuccore/OL898686.1
OL898687.1	2021	Brazil	Human	East-Central-South-African	https://www.ncbi.nlm.nih.gov/nuccore/OL898687.1
OL898688.1	2021	Brazil	Human	East-Central-South-African	https://www.ncbi.nlm.nih.gov/nuccore/OL898688.1
OL898689.1	2021	Brazil	Human	East-Central-South-African	https://www.ncbi.nlm.nih.gov/nuccore/OL898689.1
OL898690.1	2021	Brazil	Human	East-Central-South-African	https://www.ncbi.nlm.nih.gov/nuccore/OL898690.1
OL898691.1	2021	Brazil	Human	East-Central-South-African	https://www.ncbi.nlm.nih.gov/nuccore/OL898691.1
OL898692.1	2021	Brazil	Human	East-Central-South-African	https://www.ncbi.nlm.nih.gov/nuccore/OL898692.1
OL898693.1	2021	Brazil	Human	East-Central-South-African	https://www.ncbi.nlm.nih.gov/nuccore/OL898693.1
OL898694.1	2021	Brazil	Human	East-Central-South-African	https://www.ncbi.nlm.nih.gov/nuccore/OL898694.1
OL898695.1	2021	Brazil	Human	East-Central-South-African	https://www.ncbi.nlm.nih.gov/nuccore/OL898695.1
OL898696.1	2021	Brazil	Human	East-Central-South-African	https://www.ncbi.nlm.nih.gov/nuccore/OL898696.1
OL898697.1	2021	Brazil	Human	East-Central-South-African	https://www.ncbi.nlm.nih.gov/nuccore/OL898697.1
OL898698.1	2021	Brazil	Human	East-Central-South-African	https://www.ncbi.nlm.nih.gov/nuccore/OL898698.1
OL898699.1	2021	Brazil	Human	East-Central-South-African	https://www.ncbi.nlm.nih.gov/nuccore/OL898699.1
OL898700.1	2021	Brazil	Human	East-Central-South-African	https://www.ncbi.nlm.nih.gov/nuccore/OL898700.1
OL898701.1	2021	Brazil	Human	East-Central-South-African	https://www.ncbi.nlm.nih.gov/nuccore/OL898701.1
OL898702.1	2021	Brazil	Human	East-Central-South-African	https://www.ncbi.nlm.nih.gov/nuccore/OL898702.1
OL898703.1	2021	Brazil	Human	East-Central-South-African	https://www.ncbi.nlm.nih.gov/nuccore/OL898703.1
OL898704.1	2021	Brazil	Human	East-Central-South-African	https://www.ncbi.nlm.nih.gov/nuccore/OL898704.1
OL898705.1	2021	Brazil	Human	East-Central-South-African	https://www.ncbi.nlm.nih.gov/nuccore/OL898705.1
OL898706.1	2021	Brazil	Human	East-Central-South-African	https://www.ncbi.nlm.nih.gov/nuccore/OL898706.1
OL898707.1	2021	Brazil	Human	East-Central-South-African	https://www.ncbi.nlm.nih.gov/nuccore/OL898707.1
OL898708.1	2021	Brazil	Human	East-Central-South-African	https://www.ncbi.nlm.nih.gov/nuccore/OL898708.1
OL898709.1	2021	Brazil	Human	East-Central-South-African	https://www.ncbi.nlm.nih.gov/nuccore/OL898709.1
OL898710.1	2021	Brazil	Human	East-Central-South-African	https://www.ncbi.nlm.nih.gov/nuccore/OL898710.1
OL898711.1	2021	Brazil	Human	East-Central-South-African	https://www.ncbi.nlm.nih.gov/nuccore/OL898711.1
OL898712.1	2021	Brazil	Human	East-Central-South-African	https://www.ncbi.nlm.nih.gov/nuccore/OL898712.1
OL898713.1	2021	Brazil	Human	East-Central-South-African	https://www.ncbi.nlm.nih.gov/nuccore/OL898713.1
OL898714.1	2020	Brazil	Human	East-Central-South-African	https://www.ncbi.nlm.nih.gov/nuccore/OL898714.1
OL898715.1	2021	Brazil	Human	East-Central-South-African	https://www.ncbi.nlm.nih.gov/nuccore/OL898715.1
OL979153.1	2020	Cambodia	Human	East-Central-South-African	https://www.ncbi.nlm.nih.gov/nuccore/OL979153.1
OL979154.1	2020	Cambodia	Human	East-Central-South-African	https://www.ncbi.nlm.nih.gov/nuccore/OL979154.1
OL979155.1	2020	Cambodia	Human	East-Central-South-African	https://www.ncbi.nlm.nih.gov/nuccore/OL979155.1
OL979156.1	2020	Cambodia	Human	East-Central-South-African	https://www.ncbi.nlm.nih.gov/nuccore/OL979156.1
OL979157.1	2020	Cambodia	Human	East-Central-South-African	https://www.ncbi.nlm.nih.gov/nuccore/OL979157.1
OL999091.1	2020	Cambodia	Human	East-Central-South-African	https://www.ncbi.nlm.nih.gov/nuccore/OL999091.1
OL999092.1	2021	Cambodia	Human	East-Central-South-African	https://www.ncbi.nlm.nih.gov/nuccore/OL999092.1
OL999094.1	2021	Cambodia	Human	East-Central-South-African	https://www.ncbi.nlm.nih.gov/nuccore/OL999094.1
OL999095.1	2021	Cambodia	Human	East-Central-South-African	https://www.ncbi.nlm.nih.gov/nuccore/OL999095.1
OM128431.1	2018	Brazil	Human	East-Central-South-African	https://www.ncbi.nlm.nih.gov/nuccore/OM128431.1
OM128433.1	2018	Brazil	Human	East-Central-South-African	https://www.ncbi.nlm.nih.gov/nuccore/OM128433.1
OM128434.1	2018	Brazil	Human	East-Central-South-African	https://www.ncbi.nlm.nih.gov/nuccore/OM128434.1
OM128435.1	2018	Brazil	Human	East-Central-South-African	https://www.ncbi.nlm.nih.gov/nuccore/OM128435.1
OM128436.1	2018	Brazil	Human	East-Central-South-African	https://www.ncbi.nlm.nih.gov/nuccore/OM128436.1
OM128437.1	2018	Brazil	Human	East-Central-South-African	https://www.ncbi.nlm.nih.gov/nuccore/OM128437.1
OM128438.1	2016	Brazil	Human	East-Central-South-African	https://www.ncbi.nlm.nih.gov/nuccore/OM128438.1
OM128439.1	2016	Brazil	Human	East-Central-South-African	https://www.ncbi.nlm.nih.gov/nuccore/OM128439.1
OM128440.1	2018	Brazil	Human	East-Central-South-African	https://www.ncbi.nlm.nih.gov/nuccore/OM128440.1
ON009842.1	2015	Brazil	Human	East-Central-South-African	https://www.ncbi.nlm.nih.gov/nuccore/ON009842.1
ON009843.1	1953	Tanzania	Human	East-Central-South-African	https://www.ncbi.nlm.nih.gov/nuccore/ON009843.1
ON262791.1	2012	Thailand	Human	East-Central-South-African	https://www.ncbi.nlm.nih.gov/nuccore/ON262791.1
ON262792.1	2012	Thailand	Human	East-Central-South-African	https://www.ncbi.nlm.nih.gov/nuccore/ON262792.1
ON262793.1	2019	Thailand	Human	East-Central-South-African	https://www.ncbi.nlm.nih.gov/nuccore/ON262793.1
ON262794.1	2019	Thailand	Human	East-Central-South-African	https://www.ncbi.nlm.nih.gov/nuccore/ON262794.1
ON262795.1	2019	Thailand	Human	East-Central-South-African	https://www.ncbi.nlm.nih.gov/nuccore/ON262795.1
ON262796.1	2019	Thailand	Human	East-Central-South-African	https://www.ncbi.nlm.nih.gov/nuccore/ON262796.1
ON586954.1	2021	Brazil	Human	East-Central-South-African	https://www.ncbi.nlm.nih.gov/nuccore/ON586954.1
ON586955.1	2021	Brazil	Human	East-Central-South-African	https://www.ncbi.nlm.nih.gov/nuccore/ON586955.1
ON586956.1	2021	Brazil	Human	East-Central-South-African	https://www.ncbi.nlm.nih.gov/nuccore/ON586956.1
ON586957.1	2021	Brazil	Human	East-Central-South-African	https://www.ncbi.nlm.nih.gov/nuccore/ON586957.1
ON586959.1	2022	Brazil	Human	East-Central-South-African	https://www.ncbi.nlm.nih.gov/nuccore/ON586959.1
ON586961.1	2022	Brazil	Human	East-Central-South-African	https://www.ncbi.nlm.nih.gov/nuccore/ON586961.1
ON586963.1	2022	Brazil	Human	East-Central-South-African	https://www.ncbi.nlm.nih.gov/nuccore/ON586963.1
ON586964.1	2022	Brazil	Human	East-Central-South-African	https://www.ncbi.nlm.nih.gov/nuccore/ON586964.1
ON586965.1	2022	Brazil	Human	East-Central-South-African	https://www.ncbi.nlm.nih.gov/nuccore/ON586965.1
ON586967.1	2022	Brazil	Human	East-Central-South-African	https://www.ncbi.nlm.nih.gov/nuccore/ON586967.1
ON586968.1	2022	Brazil	Human	East-Central-South-African	https://www.ncbi.nlm.nih.gov/nuccore/ON586968.1
ON642355.1	2010	India	Human	East-Central-South-African	https://www.ncbi.nlm.nih.gov/nuccore/ON642355.1
ON734069.1	2018	Saudi Arabia	Human	East-Central-South-African	https://www.ncbi.nlm.nih.gov/nuccore/ON734069.1
ON838556.1	2022	India	Mosquito	East-Central-South-African	https://www.ncbi.nlm.nih.gov/nuccore/ON838556.1
ON838557.1	2022	India	Mosquito	East-Central-South-African	https://www.ncbi.nlm.nih.gov/nuccore/ON838557.1
ON887079.1	2022	India	Mosquito	East-Central-South-African	https://www.ncbi.nlm.nih.gov/nuccore/ON887079.1
ON887080.1	2022	India	Mosquito	East-Central-South-African	https://www.ncbi.nlm.nih.gov/nuccore/ON887080.1
ON887081.1	2022	India	Mosquito	East-Central-South-African	https://www.ncbi.nlm.nih.gov/nuccore/ON887081.1
OP312937.1	2018	Brazil	Human	East-Central-South-African	https://www.ncbi.nlm.nih.gov/nuccore/OP312937.1
OP312938.1	2018	Brazil	Human	East-Central-South-African	https://www.ncbi.nlm.nih.gov/nuccore/OP312938.1
OP312939.1	2018	Brazil	Human	East-Central-South-African	https://www.ncbi.nlm.nih.gov/nuccore/OP312939.1
OP312941.1	2018	Brazil	Human	East-Central-South-African	https://www.ncbi.nlm.nih.gov/nuccore/OP312941.1
OP312942.1	2018	Brazil	Human	East-Central-South-African	https://www.ncbi.nlm.nih.gov/nuccore/OP312942.1
OP312944.1	2018	Brazil	Human	East-Central-South-African	https://www.ncbi.nlm.nih.gov/nuccore/OP312944.1
OP312947.1	2018	Brazil	Human	East-Central-South-African	https://www.ncbi.nlm.nih.gov/nuccore/OP312947.1
OP312950.1	2018	Brazil	Human	East-Central-South-African	https://www.ncbi.nlm.nih.gov/nuccore/OP312950.1
OP312951.1	2018	Brazil	Human	East-Central-South-African	https://www.ncbi.nlm.nih.gov/nuccore/OP312951.1
OP312953.1	2018	Brazil	Human	East-Central-South-African	https://www.ncbi.nlm.nih.gov/nuccore/OP312953.1
OP312957.1	2018	Brazil	Human	East-Central-South-African	https://www.ncbi.nlm.nih.gov/nuccore/OP312957.1
OP312958.1	2018	Brazil	Human	East-Central-South-African	https://www.ncbi.nlm.nih.gov/nuccore/OP312958.1
OP312960.1	2018	Brazil	Human	East-Central-South-African	https://www.ncbi.nlm.nih.gov/nuccore/OP312960.1
OP312962.1	2018	Brazil	Human	East-Central-South-African	https://www.ncbi.nlm.nih.gov/nuccore/OP312962.1
OP312963.1	2018	Brazil	Human	East-Central-South-African	https://www.ncbi.nlm.nih.gov/nuccore/OP312963.1
OP312964.1	2018	Brazil	Human	East-Central-South-African	https://www.ncbi.nlm.nih.gov/nuccore/OP312964.1
OP312965.1	2018	Brazil	Human	East-Central-South-African	https://www.ncbi.nlm.nih.gov/nuccore/OP312965.1
OP312967.1	2018	Brazil	Human	East-Central-South-African	https://www.ncbi.nlm.nih.gov/nuccore/OP312967.1
OP312968.1	2018	Brazil	Human	East-Central-South-African	https://www.ncbi.nlm.nih.gov/nuccore/OP312968.1
OP312969.1	2018	Brazil	Human	East-Central-South-African	https://www.ncbi.nlm.nih.gov/nuccore/OP312969.1
OP485445.1	2022	Brazil	Human	East-Central-South-African	https://www.ncbi.nlm.nih.gov/nuccore/OP485445.1
OP485447.1	2022	Brazil	Human	East-Central-South-African	https://www.ncbi.nlm.nih.gov/nuccore/OP485447.1
OP485449.1	2022	Brazil	Human	East-Central-South-African	https://www.ncbi.nlm.nih.gov/nuccore/OP485449.1
OP485451.1	2022	Brazil	Human	East-Central-South-African	https://www.ncbi.nlm.nih.gov/nuccore/OP485451.1
OP485452.1	2022	Brazil	Human	East-Central-South-African	https://www.ncbi.nlm.nih.gov/nuccore/OP485452.1
OP485454.1	2022	Brazil	Human	East-Central-South-African	https://www.ncbi.nlm.nih.gov/nuccore/OP485454.1
OP485455.1	2022	Brazil	Human	East-Central-South-African	https://www.ncbi.nlm.nih.gov/nuccore/OP485455.1
OP615961.1	2014	Argentina	Human	Asian	https://www.ncbi.nlm.nih.gov/nuccore/OP615961.1
OP615962.1	2015	Argentina	Human	Asian	https://www.ncbi.nlm.nih.gov/nuccore/OP615962.1
OP615963.1	2016	Argentina	Human	East-Central-South-African	https://www.ncbi.nlm.nih.gov/nuccore/OP615963.1
OP964932.1	2022	Brazil	Human	East-Central-South-African	https://www.ncbi.nlm.nih.gov/nuccore/OP964932.1
OP964933.1	2022	Brazil	Human	East-Central-South-African	https://www.ncbi.nlm.nih.gov/nuccore/OP964933.1
OP964934.1	2022	Brazil	Human	East-Central-South-African	https://www.ncbi.nlm.nih.gov/nuccore/OP964934.1
OP964935.1	2022	Brazil	Human	East-Central-South-African	https://www.ncbi.nlm.nih.gov/nuccore/OP964935.1
OP964936.1	2022	Brazil	Human	East-Central-South-African	https://www.ncbi.nlm.nih.gov/nuccore/OP964936.1
OP964937.1	2022	Brazil	Human	East-Central-South-African	https://www.ncbi.nlm.nih.gov/nuccore/OP964937.1
OP964938.1	2022	Brazil	Human	East-Central-South-African	https://www.ncbi.nlm.nih.gov/nuccore/OP964938.1
OP964939.1	2022	Brazil	Human	East-Central-South-African	https://www.ncbi.nlm.nih.gov/nuccore/OP964939.1
OP964940.1	2022	Brazil	Human	East-Central-South-African	https://www.ncbi.nlm.nih.gov/nuccore/OP964940.1
OP964941.1	2022	Brazil	Human	East-Central-South-African	https://www.ncbi.nlm.nih.gov/nuccore/OP964941.1
OP964942.1	2022	Brazil	Human	East-Central-South-African	https://www.ncbi.nlm.nih.gov/nuccore/OP964942.1
OP964943.1	2022	Brazil	Human	East-Central-South-African	https://www.ncbi.nlm.nih.gov/nuccore/OP964943.1
OP964944.1	2022	Brazil	Human	East-Central-South-African	https://www.ncbi.nlm.nih.gov/nuccore/OP964944.1
OP964946.1	2022	Brazil	Human	East-Central-South-African	https://www.ncbi.nlm.nih.gov/nuccore/OP964946.1
OP964947.1	2022	Brazil	Human	East-Central-South-African	https://www.ncbi.nlm.nih.gov/nuccore/OP964947.1
OP964948.1	2022	Brazil	Human	East-Central-South-African	https://www.ncbi.nlm.nih.gov/nuccore/OP964948.1
OP964949.1	2022	Brazil	Human	East-Central-South-African	https://www.ncbi.nlm.nih.gov/nuccore/OP964949.1
OP964950.1	2022	Brazil	Human	East-Central-South-African	https://www.ncbi.nlm.nih.gov/nuccore/OP964950.1
OP964952.1	2022	Brazil	Human	East-Central-South-African	https://www.ncbi.nlm.nih.gov/nuccore/OP964952.1
OP964953.1	2022	Brazil	Human	East-Central-South-African	https://www.ncbi.nlm.nih.gov/nuccore/OP964953.1
OP964954.1	2022	Brazil	Human	East-Central-South-African	https://www.ncbi.nlm.nih.gov/nuccore/OP964954.1
OP964955.1	2022	Brazil	Human	East-Central-South-African	https://www.ncbi.nlm.nih.gov/nuccore/OP964955.1
OP964956.1	2022	Brazil	Human	East-Central-South-African	https://www.ncbi.nlm.nih.gov/nuccore/OP964956.1
OP964958.1	2022	Brazil	Human	East-Central-South-African	https://www.ncbi.nlm.nih.gov/nuccore/OP964958.1
OP964959.1	2022	Brazil	Human	East-Central-South-African	https://www.ncbi.nlm.nih.gov/nuccore/OP964959.1
OP964960.1	2022	Brazil	Human	East-Central-South-African	https://www.ncbi.nlm.nih.gov/nuccore/OP964960.1
OP964961.1	2022	Brazil	Human	East-Central-South-African	https://www.ncbi.nlm.nih.gov/nuccore/OP964961.1
OP964962.1	2022	Brazil	Human	East-Central-South-African	https://www.ncbi.nlm.nih.gov/nuccore/OP964962.1
OP964963.1	2022	Brazil	Human	East-Central-South-African	https://www.ncbi.nlm.nih.gov/nuccore/OP964963.1
OP964964.1	2022	Brazil	Human	East-Central-South-African	https://www.ncbi.nlm.nih.gov/nuccore/OP964964.1
OP964965.1	2022	Brazil	Human	East-Central-South-African	https://www.ncbi.nlm.nih.gov/nuccore/OP964965.1
OP964966.1	2022	Brazil	Human	East-Central-South-African	https://www.ncbi.nlm.nih.gov/nuccore/OP964966.1
OP964967.1	2022	Brazil	Human	East-Central-South-African	https://www.ncbi.nlm.nih.gov/nuccore/OP964967.1
OP964968.1	2022	Brazil	Human	East-Central-South-African	https://www.ncbi.nlm.nih.gov/nuccore/OP964968.1
OP964969.1	2022	Brazil	Human	East-Central-South-African	https://www.ncbi.nlm.nih.gov/nuccore/OP964969.1
OP964970.1	2022	Brazil	Human	East-Central-South-African	https://www.ncbi.nlm.nih.gov/nuccore/OP964970.1
OP964974.1	2022	Brazil	Human	East-Central-South-African	https://www.ncbi.nlm.nih.gov/nuccore/OP964974.1
OP964975.1	2022	Brazil	Human	East-Central-South-African	https://www.ncbi.nlm.nih.gov/nuccore/OP964975.1
OP964977.1	2022	Brazil	Human	East-Central-South-African	https://www.ncbi.nlm.nih.gov/nuccore/OP964977.1
OP964979.1	2022	Brazil	Human	East-Central-South-African	https://www.ncbi.nlm.nih.gov/nuccore/OP964979.1
OP964980.1	2022	Brazil	Human	East-Central-South-African	https://www.ncbi.nlm.nih.gov/nuccore/OP964980.1
OP964981.1	2022	Brazil	Human	East-Central-South-African	https://www.ncbi.nlm.nih.gov/nuccore/OP964981.1
OP964982.1	2022	Brazil	Human	East-Central-South-African	https://www.ncbi.nlm.nih.gov/nuccore/OP964982.1
OP964984.1	2022	Brazil	Human	East-Central-South-African	https://www.ncbi.nlm.nih.gov/nuccore/OP964984.1
OP964986.1	2022	Brazil	Human	East-Central-South-African	https://www.ncbi.nlm.nih.gov/nuccore/OP964986.1
OP964987.1	2022	Brazil	Human	East-Central-South-African	https://www.ncbi.nlm.nih.gov/nuccore/OP964987.1
OP964990.1	2022	Brazil	Human	East-Central-South-African	https://www.ncbi.nlm.nih.gov/nuccore/OP964990.1
OP964991.1	2022	Brazil	Human	East-Central-South-African	https://www.ncbi.nlm.nih.gov/nuccore/OP964991.1
OP964992.1	2022	Brazil	Human	East-Central-South-African	https://www.ncbi.nlm.nih.gov/nuccore/OP964992.1
OQ148617.1	2014	Brazil	Human	Asian	https://www.ncbi.nlm.nih.gov/nuccore/OQ148617.1
OQ148618.1	2014	Brazil	Human	Asian	https://www.ncbi.nlm.nih.gov/nuccore/OQ148618.1
OQ148619.1	2014	Brazil	Human	Asian	https://www.ncbi.nlm.nih.gov/nuccore/OQ148619.1
OQ148620.1	2014	Brazil	Human	Asian	https://www.ncbi.nlm.nih.gov/nuccore/OQ148620.1
OQ148621.1	2014	Brazil	Human	Asian	https://www.ncbi.nlm.nih.gov/nuccore/OQ148621.1
OQ148622.1	2014	Brazil	Human	Asian	https://www.ncbi.nlm.nih.gov/nuccore/OQ148622.1
OQ148623.1	2014	Brazil	Human	Asian	https://www.ncbi.nlm.nih.gov/nuccore/OQ148623.1
OQ148624.1	2014	Brazil	Human	Asian	https://www.ncbi.nlm.nih.gov/nuccore/OQ148624.1
OQ148625.1	2014	Brazil	Human	Asian	https://www.ncbi.nlm.nih.gov/nuccore/OQ148625.1
OQ148626.1	2014	Brazil	Human	Asian	https://www.ncbi.nlm.nih.gov/nuccore/OQ148626.1
OQ148627.1	2014	Brazil	Human	Asian	https://www.ncbi.nlm.nih.gov/nuccore/OQ148627.1
OQ148628.1	2014	Brazil	Human	Asian	https://www.ncbi.nlm.nih.gov/nuccore/OQ148628.1
OQ148629.1	2014	Brazil	Human	East-Central-South-African	https://www.ncbi.nlm.nih.gov/nuccore/OQ148629.1
OQ148630.1	2014	Brazil	Human	East-Central-South-African	https://www.ncbi.nlm.nih.gov/nuccore/OQ148630.1
OQ148631.1	2014	Brazil	Human	East-Central-South-African	https://www.ncbi.nlm.nih.gov/nuccore/OQ148631.1
OQ148632.1	2014	Brazil	Human	East-Central-South-African	https://www.ncbi.nlm.nih.gov/nuccore/OQ148632.1
OQ148633.1	2016	Brazil	Human	East-Central-South-African	https://www.ncbi.nlm.nih.gov/nuccore/OQ148633.1
OQ148634.1	2016	Brazil	Human	East-Central-South-African	https://www.ncbi.nlm.nih.gov/nuccore/OQ148634.1
OQ148635.1	2016	Brazil	Human	East-Central-South-African	https://www.ncbi.nlm.nih.gov/nuccore/OQ148635.1
OQ148636.1	2016	Brazil	Human	East-Central-South-African	https://www.ncbi.nlm.nih.gov/nuccore/OQ148636.1
OQ148637.1	2016	Brazil	Human	East-Central-South-African	https://www.ncbi.nlm.nih.gov/nuccore/OQ148637.1
OQ148638.1	2016	Brazil	Human	East-Central-South-African	https://www.ncbi.nlm.nih.gov/nuccore/OQ148638.1
OQ148639.1	2014	Brazil	Human	Asian	https://www.ncbi.nlm.nih.gov/nuccore/OQ148639.1
OQ148640.1	2016	Brazil	Human	East-Central-South-African	https://www.ncbi.nlm.nih.gov/nuccore/OQ148640.1
OQ148641.1	2016	Brazil	Human	East-Central-South-African	https://www.ncbi.nlm.nih.gov/nuccore/OQ148641.1
OQ148642.1	2016	Brazil	Human	East-Central-South-African	https://www.ncbi.nlm.nih.gov/nuccore/OQ148642.1
OQ148643.1	2016	Brazil	Human	East-Central-South-African	https://www.ncbi.nlm.nih.gov/nuccore/OQ148643.1
OQ148644.1	2016	Brazil	Human	East-Central-South-African	https://www.ncbi.nlm.nih.gov/nuccore/OQ148644.1
OQ148645.1	2016	Brazil	Human	East-Central-South-African	https://www.ncbi.nlm.nih.gov/nuccore/OQ148645.1
OQ148646.1	2016	Brazil	Human	East-Central-South-African	https://www.ncbi.nlm.nih.gov/nuccore/OQ148646.1
OQ148647.1	2016	Brazil	Human	East-Central-South-African	https://www.ncbi.nlm.nih.gov/nuccore/OQ148647.1
OQ148648.1	2016	Brazil	Human	East-Central-South-African	https://www.ncbi.nlm.nih.gov/nuccore/OQ148648.1
OQ148649.1	2016	Brazil	Human	East-Central-South-African	https://www.ncbi.nlm.nih.gov/nuccore/OQ148649.1
OQ148650.1	2016	Brazil	Human	East-Central-South-African	https://www.ncbi.nlm.nih.gov/nuccore/OQ148650.1
OQ148651.1	2014	Brazil	Human	Asian	https://www.ncbi.nlm.nih.gov/nuccore/OQ148651.1
OQ148652.1	2014	Brazil	Human	Asian	https://www.ncbi.nlm.nih.gov/nuccore/OQ148652.1
OQ148653.1	2014	Brazil	Human	Asian	https://www.ncbi.nlm.nih.gov/nuccore/OQ148653.1
OQ148654.1	2014	Brazil	Human	Asian	https://www.ncbi.nlm.nih.gov/nuccore/OQ148654.1
OQ148655.1	2014	Brazil	Human	Asian	https://www.ncbi.nlm.nih.gov/nuccore/OQ148655.1
OQ148656.1	2014	Brazil	Human	Asian	https://www.ncbi.nlm.nih.gov/nuccore/OQ148656.1
OQ148657.1	2014	Brazil	Human	Asian	https://www.ncbi.nlm.nih.gov/nuccore/OQ148657.1
OQ148658.1	2018	Brazil	Human	East-Central-South-African	https://www.ncbi.nlm.nih.gov/nuccore/OQ148658.1
OQ148659.1	2014	Brazil	Human	Asian	https://www.ncbi.nlm.nih.gov/nuccore/OQ148659.1
OQ230631.1	2018	Brazil	Human	East-Central-South-African	https://www.ncbi.nlm.nih.gov/nuccore/OQ230631.1
OQ320495.1	2021	Nicaragua	Mosquito	East-Central-South-African	https://www.ncbi.nlm.nih.gov/nuccore/OQ320495.1
OQ567722.1	2022	Paraguay	Human	East-Central-South-African	https://www.ncbi.nlm.nih.gov/nuccore/OQ567722.1
OQ567723.1	2022	Paraguay	Human	East-Central-South-African	https://www.ncbi.nlm.nih.gov/nuccore/OQ567723.1
OQ567724.1	2022	Paraguay	Human	East-Central-South-African	https://www.ncbi.nlm.nih.gov/nuccore/OQ567724.1
OQ567725.1	2022	Paraguay	Human	East-Central-South-African	https://www.ncbi.nlm.nih.gov/nuccore/OQ567725.1
OQ567726.1	2022	Paraguay	Human	East-Central-South-African	https://www.ncbi.nlm.nih.gov/nuccore/OQ567726.1
OQ567727.1	2022	Paraguay	Human	East-Central-South-African	https://www.ncbi.nlm.nih.gov/nuccore/OQ567727.1
OQ567728.1	2022	Paraguay	Human	East-Central-South-African	https://www.ncbi.nlm.nih.gov/nuccore/OQ567728.1
OQ605434.1	2020	India	Human	East-Central-South-African	https://www.ncbi.nlm.nih.gov/nuccore/OQ605434.1
OQ605435.1	2020	India	Human	East-Central-South-African	https://www.ncbi.nlm.nih.gov/nuccore/OQ605435.1
OQ605436.1	2020	India	Human	East-Central-South-African	https://www.ncbi.nlm.nih.gov/nuccore/OQ605436.1
OQ605437.1	2020	India	Human	East-Central-South-African	https://www.ncbi.nlm.nih.gov/nuccore/OQ605437.1
OQ605438.1	2020	India	Human	East-Central-South-African	https://www.ncbi.nlm.nih.gov/nuccore/OQ605438.1
OQ605439.1	2020	India	Human	East-Central-South-African	https://www.ncbi.nlm.nih.gov/nuccore/OQ605439.1
OQ605440.1	2020	India	Human	East-Central-South-African	https://www.ncbi.nlm.nih.gov/nuccore/OQ605440.1
OQ605441.1	2020	India	Human	East-Central-South-African	https://www.ncbi.nlm.nih.gov/nuccore/OQ605441.1
OQ605442.1	2020	India	Human	East-Central-South-African	https://www.ncbi.nlm.nih.gov/nuccore/OQ605442.1
OQ605443.1	2020	India	Human	East-Central-South-African	https://www.ncbi.nlm.nih.gov/nuccore/OQ605443.1
OQ605444.1	2020	India	Human	East-Central-South-African	https://www.ncbi.nlm.nih.gov/nuccore/OQ605444.1
OQ605445.1	2020	India	Human	East-Central-South-African	https://www.ncbi.nlm.nih.gov/nuccore/OQ605445.1
OQ605446.1	2020	India	Human	East-Central-South-African	https://www.ncbi.nlm.nih.gov/nuccore/OQ605446.1
OQ605447.1	2020	India	Human	East-Central-South-African	https://www.ncbi.nlm.nih.gov/nuccore/OQ605447.1
OQ605448.1	2020	India	Human	East-Central-South-African	https://www.ncbi.nlm.nih.gov/nuccore/OQ605448.1
OQ605450.1	2020	India	Human	East-Central-South-African	https://www.ncbi.nlm.nih.gov/nuccore/OQ605450.1
OQ605451.1	2020	India	Human	East-Central-South-African	https://www.ncbi.nlm.nih.gov/nuccore/OQ605451.1
OQ605452.1	2021	India	Human	East-Central-South-African	https://www.ncbi.nlm.nih.gov/nuccore/OQ605452.1
OQ605453.1	2021	India	Human	East-Central-South-African	https://www.ncbi.nlm.nih.gov/nuccore/OQ605453.1
OQ605454.1	2021	India	Human	East-Central-South-African	https://www.ncbi.nlm.nih.gov/nuccore/OQ605454.1
OQ616984.1	2022	Brazil	Human	East-Central-South-African	https://www.ncbi.nlm.nih.gov/nuccore/OQ616984.1
OQ616985.1	2023	Brazil	Human	East-Central-South-African	https://www.ncbi.nlm.nih.gov/nuccore/OQ616985.1
OQ616986.1	2023	Brazil	Human	East-Central-South-African	https://www.ncbi.nlm.nih.gov/nuccore/OQ616986.1
OQ616987.1	2023	Brazil	Human	East-Central-South-African	https://www.ncbi.nlm.nih.gov/nuccore/OQ616987.1
OQ616988.1	2023	Brazil	Human	East-Central-South-African	https://www.ncbi.nlm.nih.gov/nuccore/OQ616988.1
OQ616989.1	2023	Brazil	Human	East-Central-South-African	https://www.ncbi.nlm.nih.gov/nuccore/OQ616989.1
OQ616990.1	2023	Brazil	Human	East-Central-South-African	https://www.ncbi.nlm.nih.gov/nuccore/OQ616990.1
OQ616991.1	2023	Brazil	Human	East-Central-South-African	https://www.ncbi.nlm.nih.gov/nuccore/OQ616991.1
OQ616992.1	2023	Brazil	Human	East-Central-South-African	https://www.ncbi.nlm.nih.gov/nuccore/OQ616992.1
OQ616993.1	2022	Brazil	Human	East-Central-South-African	https://www.ncbi.nlm.nih.gov/nuccore/OQ616993.1
OQ616994.1	2022	Brazil	Human	East-Central-South-African	https://www.ncbi.nlm.nih.gov/nuccore/OQ616994.1
OQ616995.1	2022	Brazil	Human	East-Central-South-African	https://www.ncbi.nlm.nih.gov/nuccore/OQ616995.1
OQ616996.1	2022	Brazil	Human	East-Central-South-African	https://www.ncbi.nlm.nih.gov/nuccore/OQ616996.1
OQ750688.1	2010	India	Human	East-Central-South-African	https://www.ncbi.nlm.nih.gov/nuccore/OQ750688.1
OQ750689.1	2010	India	Human	East-Central-South-African	https://www.ncbi.nlm.nih.gov/nuccore/OQ750689.1
OQ750690.1	2010	India	Human	East-Central-South-African	https://www.ncbi.nlm.nih.gov/nuccore/OQ750690.1
OQ750691.1	2010	India	Human	East-Central-South-African	https://www.ncbi.nlm.nih.gov/nuccore/OQ750691.1
OQ750692.1	2010	India	Human	East-Central-South-African	https://www.ncbi.nlm.nih.gov/nuccore/OQ750692.1
OQ750693.1	2010	India	Human	East-Central-South-African	https://www.ncbi.nlm.nih.gov/nuccore/OQ750693.1
OQ750694.1	2010	India	Human	East-Central-South-African	https://www.ncbi.nlm.nih.gov/nuccore/OQ750694.1
OQ750695.1	2010	India	Human	East-Central-South-African	https://www.ncbi.nlm.nih.gov/nuccore/OQ750695.1
OQ759652.1	2021	Brazil	Human	East-Central-South-African	https://www.ncbi.nlm.nih.gov/nuccore/OQ759652.1
OQ759653.1	2021	Brazil	Human	East-Central-South-African	https://www.ncbi.nlm.nih.gov/nuccore/OQ759653.1
OQ759654.1	2021	Brazil	Human	East-Central-South-African	https://www.ncbi.nlm.nih.gov/nuccore/OQ759654.1
OQ759655.1	2022	Brazil	Human	East-Central-South-African	https://www.ncbi.nlm.nih.gov/nuccore/OQ759655.1
OQ759656.1	2022	Brazil	Human	East-Central-South-African	https://www.ncbi.nlm.nih.gov/nuccore/OQ759656.1
OQ759657.1	2022	Brazil	Human	East-Central-South-African	https://www.ncbi.nlm.nih.gov/nuccore/OQ759657.1
OQ759658.1	2022	Brazil	Human	East-Central-South-African	https://www.ncbi.nlm.nih.gov/nuccore/OQ759658.1
OQ759659.1	2022	Brazil	Human	East-Central-South-African	https://www.ncbi.nlm.nih.gov/nuccore/OQ759659.1
OQ759660.1	2022	Brazil	Human	East-Central-South-African	https://www.ncbi.nlm.nih.gov/nuccore/OQ759660.1
OQ759661.1	2022	Brazil	Human	East-Central-South-African	https://www.ncbi.nlm.nih.gov/nuccore/OQ759661.1
OQ759662.1	2022	Brazil	Human	East-Central-South-African	https://www.ncbi.nlm.nih.gov/nuccore/OQ759662.1
OQ759663.1	2022	Brazil	Human	East-Central-South-African	https://www.ncbi.nlm.nih.gov/nuccore/OQ759663.1
OQ759664.1	2022	Brazil	Human	East-Central-South-African	https://www.ncbi.nlm.nih.gov/nuccore/OQ759664.1
OQ759665.1	2022	Brazil	Human	East-Central-South-African	https://www.ncbi.nlm.nih.gov/nuccore/OQ759665.1
OQ759666.1	2022	Brazil	Human	East-Central-South-African	https://www.ncbi.nlm.nih.gov/nuccore/OQ759666.1
OQ759667.1	2022	Brazil	Human	East-Central-South-African	https://www.ncbi.nlm.nih.gov/nuccore/OQ759667.1
OQ759668.1	2022	Brazil	Human	East-Central-South-African	https://www.ncbi.nlm.nih.gov/nuccore/OQ759668.1
OQ759669.1	2022	Brazil	Human	East-Central-South-African	https://www.ncbi.nlm.nih.gov/nuccore/OQ759669.1
OQ759670.1	2022	Brazil	Human	East-Central-South-African	https://www.ncbi.nlm.nih.gov/nuccore/OQ759670.1
OQ759671.1	2022	Brazil	Human	East-Central-South-African	https://www.ncbi.nlm.nih.gov/nuccore/OQ759671.1
OQ759672.1	2022	Brazil	Human	East-Central-South-African	https://www.ncbi.nlm.nih.gov/nuccore/OQ759672.1
OQ759673.1	2022	Brazil	Human	East-Central-South-African	https://www.ncbi.nlm.nih.gov/nuccore/OQ759673.1
OQ759674.1	2022	Brazil	Human	East-Central-South-African	https://www.ncbi.nlm.nih.gov/nuccore/OQ759674.1
OQ759675.1	2022	Brazil	Human	East-Central-South-African	https://www.ncbi.nlm.nih.gov/nuccore/OQ759675.1
OQ759676.1	2022	Brazil	Human	East-Central-South-African	https://www.ncbi.nlm.nih.gov/nuccore/OQ759676.1
OQ759677.1	2022	Brazil	Human	East-Central-South-African	https://www.ncbi.nlm.nih.gov/nuccore/OQ759677.1
OQ759678.1	2022	Brazil	Human	East-Central-South-African	https://www.ncbi.nlm.nih.gov/nuccore/OQ759678.1
OQ759679.1	2022	Brazil	Human	East-Central-South-African	https://www.ncbi.nlm.nih.gov/nuccore/OQ759679.1
OQ759680.1	2022	Brazil	Human	East-Central-South-African	https://www.ncbi.nlm.nih.gov/nuccore/OQ759680.1
OQ759681.1	2022	Brazil	Human	East-Central-South-African	https://www.ncbi.nlm.nih.gov/nuccore/OQ759681.1
OQ759682.1	2022	Brazil	Human	East-Central-South-African	https://www.ncbi.nlm.nih.gov/nuccore/OQ759682.1
OQ759683.1	2022	Brazil	Human	East-Central-South-African	https://www.ncbi.nlm.nih.gov/nuccore/OQ759683.1
OQ759684.1	2022	Brazil	Human	East-Central-South-African	https://www.ncbi.nlm.nih.gov/nuccore/OQ759684.1
OQ759685.1	2022	Brazil	Human	East-Central-South-African	https://www.ncbi.nlm.nih.gov/nuccore/OQ759685.1
OQ759686.1	2022	Brazil	Human	East-Central-South-African	https://www.ncbi.nlm.nih.gov/nuccore/OQ759686.1
OQ759687.1	2022	Brazil	Human	East-Central-South-African	https://www.ncbi.nlm.nih.gov/nuccore/OQ759687.1
OQ759688.1	2022	Brazil	Human	East-Central-South-African	https://www.ncbi.nlm.nih.gov/nuccore/OQ759688.1
OQ759689.1	2022	Brazil	Human	East-Central-South-African	https://www.ncbi.nlm.nih.gov/nuccore/OQ759689.1
OQ759690.1	2022	Brazil	Human	East-Central-South-African	https://www.ncbi.nlm.nih.gov/nuccore/OQ759690.1
OQ759691.1	2022	Brazil	Human	East-Central-South-African	https://www.ncbi.nlm.nih.gov/nuccore/OQ759691.1
OQ759692.1	2022	Brazil	Human	East-Central-South-African	https://www.ncbi.nlm.nih.gov/nuccore/OQ759692.1
OQ759693.1	2022	Brazil	Human	East-Central-South-African	https://www.ncbi.nlm.nih.gov/nuccore/OQ759693.1
OQ759694.1	2022	Brazil	Human	East-Central-South-African	https://www.ncbi.nlm.nih.gov/nuccore/OQ759694.1
OQ759695.1	2022	Brazil	Human	East-Central-South-African	https://www.ncbi.nlm.nih.gov/nuccore/OQ759695.1
OQ759696.1	2022	Brazil	Human	East-Central-South-African	https://www.ncbi.nlm.nih.gov/nuccore/OQ759696.1
OQ759697.1	2022	Brazil	Human	East-Central-South-African	https://www.ncbi.nlm.nih.gov/nuccore/OQ759697.1
OQ759698.1	2022	Brazil	Human	East-Central-South-African	https://www.ncbi.nlm.nih.gov/nuccore/OQ759698.1
OQ759699.1	2022	Brazil	Human	East-Central-South-African	https://www.ncbi.nlm.nih.gov/nuccore/OQ759699.1
OQ759700.1	2022	Brazil	Human	East-Central-South-African	https://www.ncbi.nlm.nih.gov/nuccore/OQ759700.1
OQ759701.1	2022	Brazil	Human	East-Central-South-African	https://www.ncbi.nlm.nih.gov/nuccore/OQ759701.1
OQ759702.1	2022	Brazil	Human	East-Central-South-African	https://www.ncbi.nlm.nih.gov/nuccore/OQ759702.1
OQ759703.1	2022	Brazil	Human	East-Central-South-African	https://www.ncbi.nlm.nih.gov/nuccore/OQ759703.1
OQ759704.1	2019	Brazil	Human	East-Central-South-African	https://www.ncbi.nlm.nih.gov/nuccore/OQ759704.1
OQ759705.1	2019	Brazil	Human	East-Central-South-African	https://www.ncbi.nlm.nih.gov/nuccore/OQ759705.1
OQ759706.1	2019	Brazil	Human	East-Central-South-African	https://www.ncbi.nlm.nih.gov/nuccore/OQ759706.1
OQ759707.1	2019	Brazil	Human	East-Central-South-African	https://www.ncbi.nlm.nih.gov/nuccore/OQ759707.1
OQ759708.1	2019	Brazil	Human	East-Central-South-African	https://www.ncbi.nlm.nih.gov/nuccore/OQ759708.1
OQ759709.1	2019	Brazil	Human	East-Central-South-African	https://www.ncbi.nlm.nih.gov/nuccore/OQ759709.1
OQ759710.1	2019	Brazil	Human	East-Central-South-African	https://www.ncbi.nlm.nih.gov/nuccore/OQ759710.1
OQ759711.1	2019	Brazil	Human	East-Central-South-African	https://www.ncbi.nlm.nih.gov/nuccore/OQ759711.1
OQ759712.1	2021	Brazil	Human	East-Central-South-African	https://www.ncbi.nlm.nih.gov/nuccore/OQ759712.1
OQ759713.1	2019	Brazil	Human	East-Central-South-African	https://www.ncbi.nlm.nih.gov/nuccore/OQ759713.1
OQ759714.1	2021	Brazil	Human	East-Central-South-African	https://www.ncbi.nlm.nih.gov/nuccore/OQ759714.1
OQ759715.1	2019	Brazil	Human	East-Central-South-African	https://www.ncbi.nlm.nih.gov/nuccore/OQ759715.1
OQ759716.1	2019	Brazil	Human	East-Central-South-African	https://www.ncbi.nlm.nih.gov/nuccore/OQ759716.1
OQ759717.1	2021	Brazil	Human	East-Central-South-African	https://www.ncbi.nlm.nih.gov/nuccore/OQ759717.1
OQ759718.1	2021	Brazil	Human	East-Central-South-African	https://www.ncbi.nlm.nih.gov/nuccore/OQ759718.1
OQ759719.1	2021	Brazil	Human	East-Central-South-African	https://www.ncbi.nlm.nih.gov/nuccore/OQ759719.1
OQ759720.1	2021	Brazil	Human	East-Central-South-African	https://www.ncbi.nlm.nih.gov/nuccore/OQ759720.1
OQ759721.1	2021	Brazil	Human	East-Central-South-African	https://www.ncbi.nlm.nih.gov/nuccore/OQ759721.1
OQ759722.1	2021	Brazil	Human	East-Central-South-African	https://www.ncbi.nlm.nih.gov/nuccore/OQ759722.1
OQ759723.1	2021	Brazil	Human	East-Central-South-African	https://www.ncbi.nlm.nih.gov/nuccore/OQ759723.1
OQ759724.1	2021	Brazil	Human	East-Central-South-African	https://www.ncbi.nlm.nih.gov/nuccore/OQ759724.1
OQ759725.1	2021	Brazil	Human	East-Central-South-African	https://www.ncbi.nlm.nih.gov/nuccore/OQ759725.1
OQ759726.1	2021	Brazil	Human	East-Central-South-African	https://www.ncbi.nlm.nih.gov/nuccore/OQ759726.1
OQ759727.1	2021	Brazil	Human	East-Central-South-African	https://www.ncbi.nlm.nih.gov/nuccore/OQ759727.1
OQ759728.1	2021	Brazil	Human	East-Central-South-African	https://www.ncbi.nlm.nih.gov/nuccore/OQ759728.1
OQ759729.1	2021	Brazil	Human	East-Central-South-African	https://www.ncbi.nlm.nih.gov/nuccore/OQ759729.1
OQ759730.1	2021	Brazil	Human	East-Central-South-African	https://www.ncbi.nlm.nih.gov/nuccore/OQ759730.1
OQ759731.1	2021	Brazil	Human	East-Central-South-African	https://www.ncbi.nlm.nih.gov/nuccore/OQ759731.1
OQ759732.1	2021	Brazil	Human	East-Central-South-African	https://www.ncbi.nlm.nih.gov/nuccore/OQ759732.1
OQ759733.1	2021	Brazil	Human	East-Central-South-African	https://www.ncbi.nlm.nih.gov/nuccore/OQ759733.1
OQ759734.1	2021	Brazil	Human	East-Central-South-African	https://www.ncbi.nlm.nih.gov/nuccore/OQ759734.1
OQ759735.1	2021	Brazil	Human	East-Central-South-African	https://www.ncbi.nlm.nih.gov/nuccore/OQ759735.1
OQ759736.1	2021	Brazil	Human	East-Central-South-African	https://www.ncbi.nlm.nih.gov/nuccore/OQ759736.1
OQ759737.1	2021	Brazil	Human	East-Central-South-African	https://www.ncbi.nlm.nih.gov/nuccore/OQ759737.1
OQ759738.1	2021	Brazil	Human	East-Central-South-African	https://www.ncbi.nlm.nih.gov/nuccore/OQ759738.1
OQ759739.1	2021	Brazil	Human	East-Central-South-African	https://www.ncbi.nlm.nih.gov/nuccore/OQ759739.1
OQ759740.1	2021	Brazil	Human	East-Central-South-African	https://www.ncbi.nlm.nih.gov/nuccore/OQ759740.1
OQ759741.1	2021	Brazil	Human	East-Central-South-African	https://www.ncbi.nlm.nih.gov/nuccore/OQ759741.1
OQ759742.1	2015	Brazil	Human	East-Central-South-African	https://www.ncbi.nlm.nih.gov/nuccore/OQ759742.1
OQ759743.1	2015	Brazil	Human	East-Central-South-African	https://www.ncbi.nlm.nih.gov/nuccore/OQ759743.1
OQ759744.1	2021	Brazil	Human	East-Central-South-African	https://www.ncbi.nlm.nih.gov/nuccore/OQ759744.1
OQ759745.1	2015	Brazil	Human	East-Central-South-African	https://www.ncbi.nlm.nih.gov/nuccore/OQ759745.1
OQ759746.1	2015	Brazil	Human	East-Central-South-African	https://www.ncbi.nlm.nih.gov/nuccore/OQ759746.1
OQ759747.1	2015	Brazil	Human	East-Central-South-African	https://www.ncbi.nlm.nih.gov/nuccore/OQ759747.1
OQ759748.1	2015	Brazil	Human	East-Central-South-African	https://www.ncbi.nlm.nih.gov/nuccore/OQ759748.1
OQ759749.1	2015	Brazil	Human	East-Central-South-African	https://www.ncbi.nlm.nih.gov/nuccore/OQ759749.1
OQ759750.1	2015	Brazil	Human	East-Central-South-African	https://www.ncbi.nlm.nih.gov/nuccore/OQ759750.1
OQ759751.1	2015	Brazil	Human	East-Central-South-African	https://www.ncbi.nlm.nih.gov/nuccore/OQ759751.1
OQ759752.1	2015	Brazil	Human	East-Central-South-African	https://www.ncbi.nlm.nih.gov/nuccore/OQ759752.1
OQ759753.1	2015	Brazil	Human	East-Central-South-African	https://www.ncbi.nlm.nih.gov/nuccore/OQ759753.1
OQ759754.1	2015	Brazil	Human	East-Central-South-African	https://www.ncbi.nlm.nih.gov/nuccore/OQ759754.1
OQ759755.1	2015	Brazil	Human	East-Central-South-African	https://www.ncbi.nlm.nih.gov/nuccore/OQ759755.1
OQ759756.1	2021	Brazil	Human	East-Central-South-African	https://www.ncbi.nlm.nih.gov/nuccore/OQ759756.1
OQ759757.1	2015	Brazil	Human	East-Central-South-African	https://www.ncbi.nlm.nih.gov/nuccore/OQ759757.1
OQ759758.1	2022	Brazil	Human	East-Central-South-African	https://www.ncbi.nlm.nih.gov/nuccore/OQ759758.1
OQ759759.1	2021	Brazil	Human	East-Central-South-African	https://www.ncbi.nlm.nih.gov/nuccore/OQ759759.1
OQ759760.1	2021	Brazil	Human	East-Central-South-African	https://www.ncbi.nlm.nih.gov/nuccore/OQ759760.1
OQ759761.1	2021	Brazil	Human	East-Central-South-African	https://www.ncbi.nlm.nih.gov/nuccore/OQ759761.1
OQ759762.1	2021	Brazil	Human	East-Central-South-African	https://www.ncbi.nlm.nih.gov/nuccore/OQ759762.1
OQ759763.1	2021	Brazil	Human	East-Central-South-African	https://www.ncbi.nlm.nih.gov/nuccore/OQ759763.1
OQ759764.1	2021	Brazil	Human	East-Central-South-African	https://www.ncbi.nlm.nih.gov/nuccore/OQ759764.1
OQ759765.1	2021	Brazil	Human	East-Central-South-African	https://www.ncbi.nlm.nih.gov/nuccore/OQ759765.1
OQ759766.1	2021	Brazil	Human	East-Central-South-African	https://www.ncbi.nlm.nih.gov/nuccore/OQ759766.1
OQ759767.1	2021	Brazil	Human	East-Central-South-African	https://www.ncbi.nlm.nih.gov/nuccore/OQ759767.1
OQ759768.1	2021	Brazil	Human	East-Central-South-African	https://www.ncbi.nlm.nih.gov/nuccore/OQ759768.1
OQ759769.1	2021	Brazil	Human	East-Central-South-African	https://www.ncbi.nlm.nih.gov/nuccore/OQ759769.1
OQ759770.1	2021	Brazil	Human	East-Central-South-African	https://www.ncbi.nlm.nih.gov/nuccore/OQ759770.1
OQ759771.1	2021	Brazil	Human	East-Central-South-African	https://www.ncbi.nlm.nih.gov/nuccore/OQ759771.1
OQ759772.1	2021	Brazil	Human	East-Central-South-African	https://www.ncbi.nlm.nih.gov/nuccore/OQ759772.1
OQ759773.1	2021	Brazil	Human	East-Central-South-African	https://www.ncbi.nlm.nih.gov/nuccore/OQ759773.1
OQ759774.1	2021	Brazil	Human	East-Central-South-African	https://www.ncbi.nlm.nih.gov/nuccore/OQ759774.1
OQ759775.1	2021	Brazil	Human	East-Central-South-African	https://www.ncbi.nlm.nih.gov/nuccore/OQ759775.1
OQ759776.1	2022	Brazil	Human	East-Central-South-African	https://www.ncbi.nlm.nih.gov/nuccore/OQ759776.1
OQ759777.1	2022	Brazil	Human	East-Central-South-African	https://www.ncbi.nlm.nih.gov/nuccore/OQ759777.1
OQ759778.1	2022	Brazil	Human	East-Central-South-African	https://www.ncbi.nlm.nih.gov/nuccore/OQ759778.1
OQ759779.1	2022	Brazil	Human	East-Central-South-African	https://www.ncbi.nlm.nih.gov/nuccore/OQ759779.1
OQ759780.1	2022	Brazil	Human	East-Central-South-African	https://www.ncbi.nlm.nih.gov/nuccore/OQ759780.1
OQ759781.1	2022	Brazil	Human	East-Central-South-African	https://www.ncbi.nlm.nih.gov/nuccore/OQ759781.1
OQ759782.1	2022	Brazil	Human	East-Central-South-African	https://www.ncbi.nlm.nih.gov/nuccore/OQ759782.1
OQ759783.1	2022	Brazil	Human	East-Central-South-African	https://www.ncbi.nlm.nih.gov/nuccore/OQ759783.1
OQ759784.1	2022	Brazil	Human	East-Central-South-African	https://www.ncbi.nlm.nih.gov/nuccore/OQ759784.1
OQ759785.1	2021	Brazil	Human	East-Central-South-African	https://www.ncbi.nlm.nih.gov/nuccore/OQ759785.1
OQ759786.1	2021	Brazil	Human	East-Central-South-African	https://www.ncbi.nlm.nih.gov/nuccore/OQ759786.1
OQ759787.1	2021	Brazil	Human	East-Central-South-African	https://www.ncbi.nlm.nih.gov/nuccore/OQ759787.1
OQ759788.1	2021	Brazil	Human	East-Central-South-African	https://www.ncbi.nlm.nih.gov/nuccore/OQ759788.1
OQ759789.1	2021	Brazil	Human	East-Central-South-African	https://www.ncbi.nlm.nih.gov/nuccore/OQ759789.1
OQ759790.1	2021	Brazil	Human	East-Central-South-African	https://www.ncbi.nlm.nih.gov/nuccore/OQ759790.1
OQ759791.1	2021	Brazil	Human	East-Central-South-African	https://www.ncbi.nlm.nih.gov/nuccore/OQ759791.1
OQ759792.1	2021	Brazil	Human	East-Central-South-African	https://www.ncbi.nlm.nih.gov/nuccore/OQ759792.1
OQ759793.1	2021	Brazil	Human	East-Central-South-African	https://www.ncbi.nlm.nih.gov/nuccore/OQ759793.1
OQ759794.1	2021	Brazil	Human	East-Central-South-African	https://www.ncbi.nlm.nih.gov/nuccore/OQ759794.1
OQ759795.1	2022	Brazil	Human	East-Central-South-African	https://www.ncbi.nlm.nih.gov/nuccore/OQ759795.1
OQ759796.1	2022	Brazil	Human	East-Central-South-African	https://www.ncbi.nlm.nih.gov/nuccore/OQ759796.1
OQ759797.1	2021	Brazil	Human	East-Central-South-African	https://www.ncbi.nlm.nih.gov/nuccore/OQ759797.1
OQ759798.1	2022	Brazil	Human	East-Central-South-African	https://www.ncbi.nlm.nih.gov/nuccore/OQ759798.1
OQ759799.1	2022	Brazil	Human	East-Central-South-African	https://www.ncbi.nlm.nih.gov/nuccore/OQ759799.1
OQ759800.1	2022	Brazil	Human	East-Central-South-African	https://www.ncbi.nlm.nih.gov/nuccore/OQ759800.1
OQ759801.1	2022	Brazil	Human	East-Central-South-African	https://www.ncbi.nlm.nih.gov/nuccore/OQ759801.1
OQ759802.1	2022	Brazil	Human	East-Central-South-African	https://www.ncbi.nlm.nih.gov/nuccore/OQ759802.1
OQ759803.1	2022	Brazil	Human	East-Central-South-African	https://www.ncbi.nlm.nih.gov/nuccore/OQ759803.1
OQ759804.1	2022	Brazil	Human	East-Central-South-African	https://www.ncbi.nlm.nih.gov/nuccore/OQ759804.1
OQ759805.1	2022	Brazil	Human	East-Central-South-African	https://www.ncbi.nlm.nih.gov/nuccore/OQ759805.1
OQ759806.1	2022	Brazil	Human	East-Central-South-African	https://www.ncbi.nlm.nih.gov/nuccore/OQ759806.1
OQ759807.1	2022	Brazil	Human	East-Central-South-African	https://www.ncbi.nlm.nih.gov/nuccore/OQ759807.1
OQ759808.1	2022	Brazil	Human	East-Central-South-African	https://www.ncbi.nlm.nih.gov/nuccore/OQ759808.1
OQ759809.1	2022	Brazil	Human	East-Central-South-African	https://www.ncbi.nlm.nih.gov/nuccore/OQ759809.1
OQ759810.1	2022	Brazil	Human	East-Central-South-African	https://www.ncbi.nlm.nih.gov/nuccore/OQ759810.1
OQ759811.1	2022	Brazil	Human	East-Central-South-African	https://www.ncbi.nlm.nih.gov/nuccore/OQ759811.1
OQ759812.1	2022	Brazil	Human	East-Central-South-African	https://www.ncbi.nlm.nih.gov/nuccore/OQ759812.1
OQ759813.1	2022	Brazil	Human	East-Central-South-African	https://www.ncbi.nlm.nih.gov/nuccore/OQ759813.1
OQ759814.1	2022	Brazil	Human	East-Central-South-African	https://www.ncbi.nlm.nih.gov/nuccore/OQ759814.1
OQ759815.1	2022	Brazil	Human	East-Central-South-African	https://www.ncbi.nlm.nih.gov/nuccore/OQ759815.1
OQ759816.1	2022	Brazil	Human	East-Central-South-African	https://www.ncbi.nlm.nih.gov/nuccore/OQ759816.1
OQ759817.1	2022	Brazil	Human	East-Central-South-African	https://www.ncbi.nlm.nih.gov/nuccore/OQ759817.1
OQ759818.1	2022	Brazil	Human	East-Central-South-African	https://www.ncbi.nlm.nih.gov/nuccore/OQ759818.1
OQ759819.1	2022	Brazil	Human	East-Central-South-African	https://www.ncbi.nlm.nih.gov/nuccore/OQ759819.1
OQ759820.1	2022	Brazil	Human	East-Central-South-African	https://www.ncbi.nlm.nih.gov/nuccore/OQ759820.1
OQ759821.1	2022	Brazil	Human	East-Central-South-African	https://www.ncbi.nlm.nih.gov/nuccore/OQ759821.1
OQ759822.1	2022	Brazil	Human	East-Central-South-African	https://www.ncbi.nlm.nih.gov/nuccore/OQ759822.1
OQ759823.1	2022	Brazil	Human	East-Central-South-African	https://www.ncbi.nlm.nih.gov/nuccore/OQ759823.1
OQ759824.1	2022	Brazil	Human	East-Central-South-African	https://www.ncbi.nlm.nih.gov/nuccore/OQ759824.1
OQ759825.1	2022	Brazil	Human	East-Central-South-African	https://www.ncbi.nlm.nih.gov/nuccore/OQ759825.1
OQ759826.1	2022	Brazil	Human	East-Central-South-African	https://www.ncbi.nlm.nih.gov/nuccore/OQ759826.1
OQ759827.1	2022	Brazil	Human	East-Central-South-African	https://www.ncbi.nlm.nih.gov/nuccore/OQ759827.1
OQ759828.1	2022	Brazil	Human	East-Central-South-African	https://www.ncbi.nlm.nih.gov/nuccore/OQ759828.1
OQ759829.1	2022	Brazil	Human	East-Central-South-African	https://www.ncbi.nlm.nih.gov/nuccore/OQ759829.1
OQ759830.1	2022	Brazil	Human	East-Central-South-African	https://www.ncbi.nlm.nih.gov/nuccore/OQ759830.1
OQ759831.1	2022	Brazil	Human	East-Central-South-African	https://www.ncbi.nlm.nih.gov/nuccore/OQ759831.1
OQ759832.1	2022	Brazil	Human	East-Central-South-African	https://www.ncbi.nlm.nih.gov/nuccore/OQ759832.1
OQ759833.1	2022	Brazil	Human	East-Central-South-African	https://www.ncbi.nlm.nih.gov/nuccore/OQ759833.1
OQ759834.1	2022	Brazil	Human	East-Central-South-African	https://www.ncbi.nlm.nih.gov/nuccore/OQ759834.1
OQ759835.1	2022	Brazil	Human	East-Central-South-African	https://www.ncbi.nlm.nih.gov/nuccore/OQ759835.1
OQ759836.1	2021	Brazil	Human	East-Central-South-African	https://www.ncbi.nlm.nih.gov/nuccore/OQ759836.1
OQ759837.1	2022	Brazil	Human	East-Central-South-African	https://www.ncbi.nlm.nih.gov/nuccore/OQ759837.1
OQ759838.1	2022	Brazil	Human	East-Central-South-African	https://www.ncbi.nlm.nih.gov/nuccore/OQ759838.1
OQ759839.1	2022	Brazil	Human	East-Central-South-African	https://www.ncbi.nlm.nih.gov/nuccore/OQ759839.1
OQ759840.1	2022	Brazil	Human	East-Central-South-African	https://www.ncbi.nlm.nih.gov/nuccore/OQ759840.1
OQ759841.1	2022	Brazil	Human	East-Central-South-African	https://www.ncbi.nlm.nih.gov/nuccore/OQ759841.1
OQ759842.1	2022	Brazil	Human	East-Central-South-African	https://www.ncbi.nlm.nih.gov/nuccore/OQ759842.1
OQ759843.1	2022	Brazil	Human	East-Central-South-African	https://www.ncbi.nlm.nih.gov/nuccore/OQ759843.1
OQ759844.1	2022	Brazil	Human	East-Central-South-African	https://www.ncbi.nlm.nih.gov/nuccore/OQ759844.1
OQ759845.1	2021	Brazil	Human	East-Central-South-African	https://www.ncbi.nlm.nih.gov/nuccore/OQ759845.1
OQ759846.1	2021	Brazil	Human	East-Central-South-African	https://www.ncbi.nlm.nih.gov/nuccore/OQ759846.1
OQ759847.1	2021	Brazil	Human	East-Central-South-African	https://www.ncbi.nlm.nih.gov/nuccore/OQ759847.1
OQ759848.1	2021	Brazil	Human	East-Central-South-African	https://www.ncbi.nlm.nih.gov/nuccore/OQ759848.1
OQ759849.1	2021	Brazil	Human	East-Central-South-African	https://www.ncbi.nlm.nih.gov/nuccore/OQ759849.1
OQ759850.1	2021	Brazil	Human	East-Central-South-African	https://www.ncbi.nlm.nih.gov/nuccore/OQ759850.1
OQ759851.1	2021	Brazil	Human	East-Central-South-African	https://www.ncbi.nlm.nih.gov/nuccore/OQ759851.1
OQ759852.1	2021	Brazil	Human	East-Central-South-African	https://www.ncbi.nlm.nih.gov/nuccore/OQ759852.1
OQ759853.1	2021	Brazil	Human	East-Central-South-African	https://www.ncbi.nlm.nih.gov/nuccore/OQ759853.1
OQ759854.1	2021	Brazil	Human	East-Central-South-African	https://www.ncbi.nlm.nih.gov/nuccore/OQ759854.1
OQ759855.1	2021	Brazil	Human	East-Central-South-African	https://www.ncbi.nlm.nih.gov/nuccore/OQ759855.1
OQ759856.1	2021	Brazil	Human	East-Central-South-African	https://www.ncbi.nlm.nih.gov/nuccore/OQ759856.1
OQ759857.1	2021	Brazil	Human	East-Central-South-African	https://www.ncbi.nlm.nih.gov/nuccore/OQ759857.1
OQ759858.1	2021	Brazil	Human	East-Central-South-African	https://www.ncbi.nlm.nih.gov/nuccore/OQ759858.1
OQ759859.1	2021	Brazil	Human	East-Central-South-African	https://www.ncbi.nlm.nih.gov/nuccore/OQ759859.1
OQ759860.1	2021	Brazil	Human	East-Central-South-African	https://www.ncbi.nlm.nih.gov/nuccore/OQ759860.1
OQ759861.1	2021	Brazil	Human	East-Central-South-African	https://www.ncbi.nlm.nih.gov/nuccore/OQ759861.1
OQ759862.1	2021	Brazil	Human	East-Central-South-African	https://www.ncbi.nlm.nih.gov/nuccore/OQ759862.1
OQ759863.1	2021	Brazil	Human	East-Central-South-African	https://www.ncbi.nlm.nih.gov/nuccore/OQ759863.1
OQ759864.1	2021	Brazil	Human	East-Central-South-African	https://www.ncbi.nlm.nih.gov/nuccore/OQ759864.1
OQ759865.1	2021	Brazil	Human	East-Central-South-African	https://www.ncbi.nlm.nih.gov/nuccore/OQ759865.1
OQ759866.1	2021	Brazil	Human	East-Central-South-African	https://www.ncbi.nlm.nih.gov/nuccore/OQ759866.1
OQ759867.1	2021	Brazil	Human	East-Central-South-African	https://www.ncbi.nlm.nih.gov/nuccore/OQ759867.1
OQ759868.1	2021	Brazil	Human	East-Central-South-African	https://www.ncbi.nlm.nih.gov/nuccore/OQ759868.1
OQ759869.1	2021	Brazil	Human	East-Central-South-African	https://www.ncbi.nlm.nih.gov/nuccore/OQ759869.1
OQ759870.1	2021	Brazil	Human	East-Central-South-African	https://www.ncbi.nlm.nih.gov/nuccore/OQ759870.1
OQ759871.1	2021	Brazil	Human	East-Central-South-African	https://www.ncbi.nlm.nih.gov/nuccore/OQ759871.1
OQ759872.1	2021	Brazil	Human	East-Central-South-African	https://www.ncbi.nlm.nih.gov/nuccore/OQ759872.1
OQ759873.1	2021	Brazil	Human	East-Central-South-African	https://www.ncbi.nlm.nih.gov/nuccore/OQ759873.1
OQ759874.1	2021	Brazil	Human	East-Central-South-African	https://www.ncbi.nlm.nih.gov/nuccore/OQ759874.1
OQ759875.1	2021	Brazil	Human	East-Central-South-African	https://www.ncbi.nlm.nih.gov/nuccore/OQ759875.1
OQ759876.1	2021	Brazil	Human	East-Central-South-African	https://www.ncbi.nlm.nih.gov/nuccore/OQ759876.1
OQ759877.1	2021	Brazil	Human	East-Central-South-African	https://www.ncbi.nlm.nih.gov/nuccore/OQ759877.1
OQ759878.1	2021	Brazil	Human	East-Central-South-African	https://www.ncbi.nlm.nih.gov/nuccore/OQ759878.1
OQ759879.1	2021	Brazil	Human	East-Central-South-African	https://www.ncbi.nlm.nih.gov/nuccore/OQ759879.1
OQ759880.1	2021	Brazil	Human	East-Central-South-African	https://www.ncbi.nlm.nih.gov/nuccore/OQ759880.1
OQ759881.1	2021	Brazil	Human	East-Central-South-African	https://www.ncbi.nlm.nih.gov/nuccore/OQ759881.1
OQ759882.1	2021	Brazil	Human	East-Central-South-African	https://www.ncbi.nlm.nih.gov/nuccore/OQ759882.1
OQ759883.1	2022	Brazil	Human	East-Central-South-African	https://www.ncbi.nlm.nih.gov/nuccore/OQ759883.1
OQ759884.1	2022	Brazil	Human	East-Central-South-African	https://www.ncbi.nlm.nih.gov/nuccore/OQ759884.1
OQ759885.1	2022	Brazil	Human	East-Central-South-African	https://www.ncbi.nlm.nih.gov/nuccore/OQ759885.1
OQ759886.1	2022	Brazil	Human	East-Central-South-African	https://www.ncbi.nlm.nih.gov/nuccore/OQ759886.1
OQ759887.1	2021	Brazil	Human	East-Central-South-African	https://www.ncbi.nlm.nih.gov/nuccore/OQ759887.1
OQ759888.1	2022	Brazil	Human	East-Central-South-African	https://www.ncbi.nlm.nih.gov/nuccore/OQ759888.1
OQ759889.1	2022	Brazil	Human	East-Central-South-African	https://www.ncbi.nlm.nih.gov/nuccore/OQ759889.1
OQ759890.1	2021	Brazil	Human	East-Central-South-African	https://www.ncbi.nlm.nih.gov/nuccore/OQ759890.1
OQ759891.1	2022	Brazil	Human	East-Central-South-African	https://www.ncbi.nlm.nih.gov/nuccore/OQ759891.1
OQ759892.1	2022	Brazil	Human	East-Central-South-African	https://www.ncbi.nlm.nih.gov/nuccore/OQ759892.1
OQ759893.1	2022	Brazil	Human	East-Central-South-African	https://www.ncbi.nlm.nih.gov/nuccore/OQ759893.1
OQ759894.1	2022	Brazil	Human	East-Central-South-African	https://www.ncbi.nlm.nih.gov/nuccore/OQ759894.1
OQ759895.1	2022	Brazil	Human	East-Central-South-African	https://www.ncbi.nlm.nih.gov/nuccore/OQ759895.1
OQ759896.1	2022	Brazil	Human	East-Central-South-African	https://www.ncbi.nlm.nih.gov/nuccore/OQ759896.1
OQ759897.1	2022	Brazil	Human	East-Central-South-African	https://www.ncbi.nlm.nih.gov/nuccore/OQ759897.1
OQ759898.1	2022	Brazil	Human	East-Central-South-African	https://www.ncbi.nlm.nih.gov/nuccore/OQ759898.1
OQ759899.1	2022	Brazil	Human	East-Central-South-African	https://www.ncbi.nlm.nih.gov/nuccore/OQ759899.1
OQ759900.1	2022	Brazil	Human	East-Central-South-African	https://www.ncbi.nlm.nih.gov/nuccore/OQ759900.1
OQ759901.1	2022	Brazil	Human	East-Central-South-African	https://www.ncbi.nlm.nih.gov/nuccore/OQ759901.1
OQ759902.1	2022	Brazil	Human	East-Central-South-African	https://www.ncbi.nlm.nih.gov/nuccore/OQ759902.1
OQ759903.1	2022	Brazil	Human	East-Central-South-African	https://www.ncbi.nlm.nih.gov/nuccore/OQ759903.1
OQ759904.1	2022	Brazil	Human	East-Central-South-African	https://www.ncbi.nlm.nih.gov/nuccore/OQ759904.1
OQ759905.1	2022	Brazil	Human	East-Central-South-African	https://www.ncbi.nlm.nih.gov/nuccore/OQ759905.1
OQ759906.1	2022	Brazil	Human	East-Central-South-African	https://www.ncbi.nlm.nih.gov/nuccore/OQ759906.1
OQ759907.1	2021	Brazil	Human	East-Central-South-African	https://www.ncbi.nlm.nih.gov/nuccore/OQ759907.1
OQ759908.1	2022	Brazil	Human	East-Central-South-African	https://www.ncbi.nlm.nih.gov/nuccore/OQ759908.1
OQ759909.1	2022	Brazil	Human	East-Central-South-African	https://www.ncbi.nlm.nih.gov/nuccore/OQ759909.1
OQ759910.1	2022	Brazil	Human	East-Central-South-African	https://www.ncbi.nlm.nih.gov/nuccore/OQ759910.1
OQ759911.1	2022	Brazil	Human	East-Central-South-African	https://www.ncbi.nlm.nih.gov/nuccore/OQ759911.1
OQ759912.1	2022	Brazil	Human	East-Central-South-African	https://www.ncbi.nlm.nih.gov/nuccore/OQ759912.1
OQ759913.1	2022	Brazil	Human	East-Central-South-African	https://www.ncbi.nlm.nih.gov/nuccore/OQ759913.1
OQ759914.1	2022	Brazil	Human	East-Central-South-African	https://www.ncbi.nlm.nih.gov/nuccore/OQ759914.1
OQ759915.1	2022	Brazil	Human	East-Central-South-African	https://www.ncbi.nlm.nih.gov/nuccore/OQ759915.1
OQ759916.1	2022	Brazil	Human	East-Central-South-African	https://www.ncbi.nlm.nih.gov/nuccore/OQ759916.1
OQ759917.1	2022	Brazil	Human	East-Central-South-African	https://www.ncbi.nlm.nih.gov/nuccore/OQ759917.1
OQ759918.1	2022	Brazil	Human	East-Central-South-African	https://www.ncbi.nlm.nih.gov/nuccore/OQ759918.1
OQ759919.1	2022	Brazil	Human	East-Central-South-African	https://www.ncbi.nlm.nih.gov/nuccore/OQ759919.1
OQ759920.1	2022	Brazil	Human	East-Central-South-African	https://www.ncbi.nlm.nih.gov/nuccore/OQ759920.1
OQ759921.1	2022	Brazil	Human	East-Central-South-African	https://www.ncbi.nlm.nih.gov/nuccore/OQ759921.1
OQ759922.1	2022	Brazil	Human	East-Central-South-African	https://www.ncbi.nlm.nih.gov/nuccore/OQ759922.1
OQ759923.1	2022	Brazil	Human	East-Central-South-African	https://www.ncbi.nlm.nih.gov/nuccore/OQ759923.1
OQ759924.1	2022	Brazil	Human	East-Central-South-African	https://www.ncbi.nlm.nih.gov/nuccore/OQ759924.1
OQ759925.1	2022	Brazil	Human	East-Central-South-African	https://www.ncbi.nlm.nih.gov/nuccore/OQ759925.1
OQ759926.1	2022	Brazil	Human	East-Central-South-African	https://www.ncbi.nlm.nih.gov/nuccore/OQ759926.1
OQ759927.1	2022	Brazil	Human	East-Central-South-African	https://www.ncbi.nlm.nih.gov/nuccore/OQ759927.1
OQ759928.1	2022	Brazil	Human	East-Central-South-African	https://www.ncbi.nlm.nih.gov/nuccore/OQ759928.1
OQ759929.1	2022	Brazil	Human	East-Central-South-African	https://www.ncbi.nlm.nih.gov/nuccore/OQ759929.1
OQ759930.1	2022	Brazil	Human	East-Central-South-African	https://www.ncbi.nlm.nih.gov/nuccore/OQ759930.1
OQ759931.1	2022	Brazil	Human	East-Central-South-African	https://www.ncbi.nlm.nih.gov/nuccore/OQ759931.1
OQ759932.1	2022	Brazil	Human	East-Central-South-African	https://www.ncbi.nlm.nih.gov/nuccore/OQ759932.1
OQ759933.1	2022	Brazil	Human	East-Central-South-African	https://www.ncbi.nlm.nih.gov/nuccore/OQ759933.1
OQ759934.1	2022	Brazil	Human	East-Central-South-African	https://www.ncbi.nlm.nih.gov/nuccore/OQ759934.1
OQ759935.1	2022	Brazil	Human	East-Central-South-African	https://www.ncbi.nlm.nih.gov/nuccore/OQ759935.1
OQ759936.1	2022	Brazil	Human	East-Central-South-African	https://www.ncbi.nlm.nih.gov/nuccore/OQ759936.1
OQ759937.1	2022	Brazil	Human	East-Central-South-African	https://www.ncbi.nlm.nih.gov/nuccore/OQ759937.1
OQ759938.1	2022	Brazil	Human	East-Central-South-African	https://www.ncbi.nlm.nih.gov/nuccore/OQ759938.1
OQ759939.1	2022	Brazil	Human	East-Central-South-African	https://www.ncbi.nlm.nih.gov/nuccore/OQ759939.1
OQ759940.1	2022	Brazil	Human	East-Central-South-African	https://www.ncbi.nlm.nih.gov/nuccore/OQ759940.1
OQ759941.1	2022	Brazil	Human	East-Central-South-African	https://www.ncbi.nlm.nih.gov/nuccore/OQ759941.1
OQ759942.1	2022	Brazil	Human	East-Central-South-African	https://www.ncbi.nlm.nih.gov/nuccore/OQ759942.1
OQ759943.1	2022	Brazil	Human	East-Central-South-African	https://www.ncbi.nlm.nih.gov/nuccore/OQ759943.1
OQ759944.1	2022	Brazil	Human	East-Central-South-African	https://www.ncbi.nlm.nih.gov/nuccore/OQ759944.1
OQ759945.1	2022	Brazil	Human	East-Central-South-African	https://www.ncbi.nlm.nih.gov/nuccore/OQ759945.1
OQ759946.1	2022	Brazil	Human	East-Central-South-African	https://www.ncbi.nlm.nih.gov/nuccore/OQ759946.1
OQ759947.1	2022	Brazil	Human	East-Central-South-African	https://www.ncbi.nlm.nih.gov/nuccore/OQ759947.1
OQ759948.1	2022	Brazil	Human	East-Central-South-African	https://www.ncbi.nlm.nih.gov/nuccore/OQ759948.1
OQ759949.1	2022	Brazil	Human	East-Central-South-African	https://www.ncbi.nlm.nih.gov/nuccore/OQ759949.1
OQ759950.1	2022	Brazil	Human	East-Central-South-African	https://www.ncbi.nlm.nih.gov/nuccore/OQ759950.1
OQ759951.1	2022	Brazil	Human	East-Central-South-African	https://www.ncbi.nlm.nih.gov/nuccore/OQ759951.1
OQ759952.1	2022	Brazil	Human	East-Central-South-African	https://www.ncbi.nlm.nih.gov/nuccore/OQ759952.1
OQ759953.1	2022	Brazil	Human	East-Central-South-African	https://www.ncbi.nlm.nih.gov/nuccore/OQ759953.1
OQ759954.1	2022	Brazil	Human	East-Central-South-African	https://www.ncbi.nlm.nih.gov/nuccore/OQ759954.1
OQ759955.1	2022	Brazil	Human	East-Central-South-African	https://www.ncbi.nlm.nih.gov/nuccore/OQ759955.1
OQ759956.1	2022	Brazil	Human	East-Central-South-African	https://www.ncbi.nlm.nih.gov/nuccore/OQ759956.1
OQ759957.1	2022	Brazil	Human	East-Central-South-African	https://www.ncbi.nlm.nih.gov/nuccore/OQ759957.1
OQ759958.1	2022	Brazil	Human	East-Central-South-African	https://www.ncbi.nlm.nih.gov/nuccore/OQ759958.1
OQ759959.1	2022	Brazil	Human	East-Central-South-African	https://www.ncbi.nlm.nih.gov/nuccore/OQ759959.1
OQ759960.1	2022	Brazil	Human	East-Central-South-African	https://www.ncbi.nlm.nih.gov/nuccore/OQ759960.1
OQ759961.1	2022	Brazil	Human	East-Central-South-African	https://www.ncbi.nlm.nih.gov/nuccore/OQ759961.1
OQ759962.1	2022	Brazil	Human	East-Central-South-African	https://www.ncbi.nlm.nih.gov/nuccore/OQ759962.1
OQ759963.1	2022	Brazil	Human	East-Central-South-African	https://www.ncbi.nlm.nih.gov/nuccore/OQ759963.1
OQ759964.1	2022	Brazil	Human	East-Central-South-African	https://www.ncbi.nlm.nih.gov/nuccore/OQ759964.1
OQ759965.1	2022	Brazil	Human	East-Central-South-African	https://www.ncbi.nlm.nih.gov/nuccore/OQ759965.1
OQ759966.1	2022	Brazil	Human	East-Central-South-African	https://www.ncbi.nlm.nih.gov/nuccore/OQ759966.1
OQ759967.1	2022	Brazil	Human	East-Central-South-African	https://www.ncbi.nlm.nih.gov/nuccore/OQ759967.1
OQ759968.1	2022	Brazil	Human	East-Central-South-African	https://www.ncbi.nlm.nih.gov/nuccore/OQ759968.1
OQ759969.1	2022	Brazil	Human	East-Central-South-African	https://www.ncbi.nlm.nih.gov/nuccore/OQ759969.1
OQ759970.1	2022	Brazil	Human	East-Central-South-African	https://www.ncbi.nlm.nih.gov/nuccore/OQ759970.1
OQ759971.1	2022	Brazil	Human	East-Central-South-African	https://www.ncbi.nlm.nih.gov/nuccore/OQ759971.1
OQ759972.1	2022	Brazil	Human	East-Central-South-African	https://www.ncbi.nlm.nih.gov/nuccore/OQ759972.1
OQ759973.1	2022	Brazil	Human	East-Central-South-African	https://www.ncbi.nlm.nih.gov/nuccore/OQ759973.1
OQ759974.1	2021	Brazil	Human	East-Central-South-African	https://www.ncbi.nlm.nih.gov/nuccore/OQ759974.1
OQ759975.1	2021	Brazil	Human	East-Central-South-African	https://www.ncbi.nlm.nih.gov/nuccore/OQ759975.1
OQ759976.1	2021	Brazil	Human	East-Central-South-African	https://www.ncbi.nlm.nih.gov/nuccore/OQ759976.1
OQ759977.1	2021	Brazil	Human	East-Central-South-African	https://www.ncbi.nlm.nih.gov/nuccore/OQ759977.1
OQ759978.1	2021	Brazil	Human	East-Central-South-African	https://www.ncbi.nlm.nih.gov/nuccore/OQ759978.1
OQ759979.1	2021	Brazil	Human	East-Central-South-African	https://www.ncbi.nlm.nih.gov/nuccore/OQ759979.1
OQ759980.1	2021	Brazil	Human	East-Central-South-African	https://www.ncbi.nlm.nih.gov/nuccore/OQ759980.1
OQ759981.1	2021	Brazil	Human	East-Central-South-African	https://www.ncbi.nlm.nih.gov/nuccore/OQ759981.1
OQ759982.1	2021	Brazil	Human	East-Central-South-African	https://www.ncbi.nlm.nih.gov/nuccore/OQ759982.1
OQ759983.1	2021	Brazil	Human	East-Central-South-African	https://www.ncbi.nlm.nih.gov/nuccore/OQ759983.1
OQ759984.1	2021	Brazil	Human	East-Central-South-African	https://www.ncbi.nlm.nih.gov/nuccore/OQ759984.1
OQ759985.1	2021	Brazil	Human	East-Central-South-African	https://www.ncbi.nlm.nih.gov/nuccore/OQ759985.1
OQ759986.1	2021	Brazil	Human	East-Central-South-African	https://www.ncbi.nlm.nih.gov/nuccore/OQ759986.1
OQ759987.1	2021	Brazil	Human	East-Central-South-African	https://www.ncbi.nlm.nih.gov/nuccore/OQ759987.1
[truncated: 714 more rows]
