# Supplementary material for: Genetic diversity of the chikungunya virus E2 gene and its implications for the efficacy of vaccines and therapeutic antibodies highlights the urgent need for a pan virus vaccine
Source: Research Square preprint supplement (doi:10.21203/rs.3.rs-7628294/v1), 2025-11-24
Supplement: Supplementary file 3 [file bd756dd8d7163af523ae7def.xlsx]

## Sheet: 5ANY Predictions
Supplementary File 4: Table S1: Affinity prediction of Fab-265 (PDB ID: 5ANY) E2-associated polymorphisms
Chain	Wild Residue	Residue Position	Mutant Residue	RSA (%)	Predicted ΔΔG	Outcome
B	N	507	D	18.2	0.481	Increased affinity
B	N	507	T	18.2	0.206	Increased affinity
B	V	508	A	97	-0.119	Reduced affinity
B	A	511	V	99	-0.003	Reduced affinity
B	T	512	I	58.5	0.437	Increased affinity
B	R	513	K	62.4	0.383	Increased affinity
B	P	514	Q	0.3	0.04	Increased affinity
B	H	518	P	19	0.005	Increased affinity
B	H	518	Q	19	0.101	Increased affinity
B	H	518	R	19	0.098	Increased affinity
B	C	519	G	0	-0.284	Reduced affinity
B	C	519	R	0	-0.132	Reduced affinity
B	D	521	V	34.8	-0.398	Reduced affinity
B	G	523	A	80.4	0.188	Increased affinity
B	G	523	E	80.4	0.657	Increased affinity
B	H	526	Y	86.3	0.33	Increased affinity
B	S	527	P	20.5	0.413	Increased affinity
B	V	532	I	0	-0.017	Reduced affinity
B	A	533	V	0	-0.007	Reduced affinity
B	L	534	I	0	0	Increased affinity
B	R	536	H	5.2	-0.274	Reduced affinity
B	I	537	L	0	-0.017	Reduced affinity
B	I	537	V	0	-0.018	Reduced affinity
B	N	539	S	61.8	-0.248	Reduced affinity
B	T	542	I	40.2	0.147	Increased affinity
B	T	545	R	3.4	-0.203	Reduced affinity
B	L	546	Q	0.6	0.087	Increased affinity
B	K	547	H	4.8	-0.199	Reduced affinity
B	K	547	N	4.8	-0.07	Reduced affinity
B	I	548	L	0	-0.001	Reduced affinity
B	V	550	I	0	0	Increased affinity
B	L	552	F	0	-0.022	Reduced affinity
B	I	554	L	0.6	-0.072	Reduced affinity
B	G	555	R	14.4	0.014	Increased affinity
B	I	556	L	0	-0.246	Reduced affinity
B	I	556	T	0	-0.352	Reduced affinity
B	K	557	G	36.5	-0.193	Reduced affinity
B	K	557	Q	36.5	-0.168	Reduced affinity
B	K	557	R	36.5	-0.23	Reduced affinity
B	D	560	G	28.5	-0.219	Reduced affinity
B	S	561	G	52.1	-0.01	Reduced affinity
B	S	561	N	52.1	0.012	Increased affinity
B	H	562	Y	45.6	0.337	Increased affinity
B	D	563	G	42.7	-0.202	Reduced affinity
B	W	564	R	88.6	-0.203	Reduced affinity
B	K	566	E	29.9	0.204	Increased affinity
B	Y	569	H	4	0.193	Increased affinity
B	Y	569	I	4	0.239	Increased affinity
B	N	572	S	37.2	0.707	Increased affinity
B	N	572	T	37.2	0.656	Increased affinity
B	H	573	Y	29.1	0.104	Increased affinity
B	M	574	L	20.1	0.746	Increased affinity
B	M	574	I	20.1	0.746	Increased affinity
B	M	574	T	20.1	0.443	Increased affinity
B	M	574	V	20.1	0.799	Increased affinity
B	A	576	T	39.5	0.196	Increased affinity
B	E	579	G	66.6	-0.356	Reduced affinity
B	A	581	V	105.3	0.078	Increased affinity
B	G	582	R	44.7	0.013	Increased affinity
B	L	583	I	0	-0.007	Reduced affinity
B	F	584	L	44.3	-0.798	Reduced affinity
B	F	584	I	44.3	-0.798	Reduced affinity
B	F	584	S	44.3	-0.771	Reduced affinity
B	V	585	A	0	-0.049	Reduced affinity
B	R	586	K	42.1	0.255	Increased affinity
B	T	587	S	0	-0.199	Reduced affinity
B	S	588	L	64.8	0.124	Increased affinity
B	A	589	S	58.1	-0.042	Reduced affinity
B	P	590	L	71.9	0.048	Increased affinity
B	P	590	S	71.9	-0.054	Reduced affinity
B	T	592	A	92.7	-0.008	Reduced affinity
B	T	592	M	92.7	0.005	Increased affinity
B	T	592	S	92.7	-0.051	Reduced affinity
B	T	594	I	32.3	0.33	Increased affinity
B	M	597	T	25.9	-0.18	Reduced affinity
B	A	603	T	0	0.344	Increased affinity
B	K	607	R	75.6	-0.071	Reduced affinity
B	G	608	R	19.2	0	Increased affinity
B	T	610	I	53.5	0.308	Increased affinity
B	T	610	S	53.5	-0.347	Reduced affinity
B	L	611	M	0	0.182	Increased affinity
B	L	611	V	0	-0.125	Reduced affinity
B	V	613	A	0	-0.038	Reduced affinity
B	F	615	L	0	-0.203	Reduced affinity
B	T	616	I	41.7	0.06	Increased affinity
B	S	618	G	77.8	-0.119	Reduced affinity
B	R	619	S	64.8	0.708	Increased affinity
B	R	619	W	64.8	0.335	Increased affinity
B	K	620	M	89.2	0.019	Increased affinity
B	K	620	N	89.2	0.009	Increased affinity
B	K	620	S	89.2	0.053	Increased affinity
B	I	621	F	68.1	0.09	Increased affinity
B	I	621	L	68.1	-0.061	Reduced affinity
B	I	621	M	68.1	-0.582	Reduced affinity
B	I	621	N	68.1	-0.251	Reduced affinity
B	I	621	S	68.1	-0.259	Reduced affinity
B	I	621	T	68.1	-0.223	Reduced affinity
B	I	621	V	68.1	-0.117	Reduced affinity
B	S	622	G	59.8	-0.016	Reduced affinity
B	S	622	Q	59.8	0.026	Increased affinity
B	S	622	R	59.8	-0.067	Reduced affinity
B	H	623	L	33.5	-0.045	Reduced affinity
B	H	623	P	33.5	-0.098	Reduced affinity
B	H	623	R	33.5	-0.248	Reduced affinity
B	H	623	T	33.5	-0.252	Reduced affinity
B	S	624	T	27.6	-0.015	Reduced affinity
B	T	626	M	26	0.145	Increased affinity
B	P	628	S	37.1	0.758	Increased affinity
B	H	630	R	71.3	-0.188	Reduced affinity
B	H	631	L	5.3	0.023	Increased affinity
B	H	631	Y	5.3	0.36	Increased affinity
B	D	632	N	48.5	-0.077	Reduced affinity
B	D	632	E	48.5	0.006	Increased affinity
B	P	633	S	38.4	-0.092	Reduced affinity
B	P	634	L	67.2	0.018	Increased affinity
B	V	635	A	110.1	-0.02	Reduced affinity
B	V	635	G	110.1	-0.021	Reduced affinity
B	V	635	M	110.1	-0.076	Reduced affinity
B	K	640	R	90.2	-0.045	Reduced affinity
B	H	642	Y	84.1	-0.014	Reduced affinity
B	S	643	A	24.9	0.099	Increased affinity
B	S	643	Y	24.9	0.111	Increased affinity
B	Q	646	H	88.7	0.082	Increased affinity
B	Q	646	R	88.7	-0.044	Reduced affinity
B	H	647	Q	82.5	-0.047	Reduced affinity
B	H	647	Y	82.5	0.049	Increased affinity
B	K	649	E	33.4	0.102	Increased affinity
B	K	649	R	33.4	-0.115	Reduced affinity
B	E	650	D	60.7	-0.046	Reduced affinity
B	L	651	M	46.6	-0.562	Reduced affinity
B	P	652	L	57.5	-0.023	Reduced affinity
B	P	652	S	57.5	-0.115	Reduced affinity
B	P	652	T	57.5	-0.061	Reduced affinity
B	T	655	S	59.7	-0.135	Reduced affinity
B	Y	656	H	72.2	-0.448	Reduced affinity
B	V	657	A	45.2	-0.166	Reduced affinity
B	V	657	T	45.2	-0.065	Reduced affinity
B	Q	658	H	96.6	0.088	Increased affinity
B	Q	658	R	96.6	-0.059	Reduced affinity
B	S	659	N	70	-0.021	Reduced affinity
B	T	660	N	26.1	-0.331	Reduced affinity
B	A	662	V	2.9	-0.16	Reduced affinity
B	T	664	I	56.9	0.269	Increased affinity
B	T	664	A	56.9	-0.018	Reduced affinity
B	E	665	D	13.8	-0.115	Reduced affinity
B	E	666	D	43.1	-0.209	Reduced affinity
B	I	667	M	2.9	0.094	Increased affinity
B	I	667	T	2.9	0.094	Increased affinity
B	I	667	V	2.9	-0.366	Reduced affinity
B	H	670	N	3.6	-0.012	Reduced affinity
B	M	671	V	4.3	-0.037	Reduced affinity
B	D	674	G	2.1	0.278	Increased affinity
B	R	678	H	7.9	0	Increased affinity
B	T	679	A	84.6	0.027	Increased affinity
B	L	680	I	7.6	0	Increased affinity
B	M	681	L	0.6	0	Increased affinity
B	M	681	T	0.6	0	Increased affinity
B	M	681	V	0.6	0	Increased affinity
B	S	682	L	61.5	0	Increased affinity
B	S	682	T	61.5	0	Increased affinity
B	Q	684	R	6.6	0	Increased affinity
B	S	685	A	0.8	0	Increased affinity
B	S	685	C	0.8	0	Increased affinity
B	S	685	Y	0.8	0	Increased affinity
B	G	686	S	0	0	Increased affinity
B	N	687	S	0	0	Increased affinity
B	K	689	T	34.3	0	Increased affinity
B	T	691	A	42.5	0	Increased affinity
B	T	691	I	42.5	0	Increased affinity
B	T	691	S	42.5	0	Increased affinity
B	G	694	C	113.4	-0.146	Reduced affinity
B	G	694	S	113.4	0.116	Increased affinity
B	G	694	N	113.4	0.222	Increased affinity
B	Q	695	R	49.7	-0.057	Reduced affinity
B	V	697	A	0	0.002	Increased affinity
B	V	697	E	0	0	Increased affinity
B	R	698	Q	31.4	0.015	Increased affinity
B	K	700	R	33	0	Increased affinity
B	N	702	D	27.9	0	Increased affinity
B	N	702	I	27.9	0	Increased affinity
B	N	702	S	27.9	0	Increased affinity
B	G	705	D	41.9	0	Increased affinity
B	G	705	S	41.9	0	Increased affinity
B	S	706	L	56.9	0	Increased affinity
B	N	707	D	45.8	0	Increased affinity
B	N	707	H	45.8	0	Increased affinity
B	N	707	S	45.8	0	Increased affinity
B	N	707	T	45.8	0	Increased affinity
B	E	708	D	86.6	0	Increased affinity
B	L	710	I	44.6	0.175	Increased affinity
B	L	710	Q	44.6	-0.246	Reduced affinity
B	L	710	S	44.6	-0.272	Reduced affinity
B	L	710	T	44.6	-0.244	Reduced affinity
B	L	710	V	44.6	0.126	Increased affinity
B	T	711	I	4.2	0.286	Increased affinity
B	T	713	I	71.1	0.745	Increased affinity
B	T	713	R	71.1	-0.574	Reduced affinity
B	D	714	N	36.4	0	Increased affinity
B	V	716	E	2.1	0	Increased affinity
B	V	716	M	2.1	0	Increased affinity
B	I	717	V	0.5	0	Increased affinity
B	N	718	G	0	0	Increased affinity
B	N	718	S	0	0	Increased affinity
B	N	719	S	0.4	0	Increased affinity
B	K	721	G	64.2	0	Increased affinity
B	K	721	I	64.2	0	Increased affinity
B	K	721	R	64.2	0	Increased affinity
B	V	722	I	34.3	0	Increased affinity
B	H	726	Y	6.8	0	Increased affinity
B	A	727	T	0.4	0	Increased affinity
B	A	727	V	0.4	0	Increased affinity
B	A	728	E	4.2	0.001	Increased affinity
B	A	728	T	4.2	0.003	Increased affinity
B	V	729	I	11.1	0.223	Increased affinity
B	N	731	D	0.3	0	Increased affinity
B	K	733	E	0	0.097	Increased affinity
B	K	733	R	0	-0.105	Reduced affinity
B	K	734	N	0	-0.029	Reduced affinity
B	K	734	R	0	-0.027	Reduced affinity
B	Y	737	C	12.6	0.248	Increased affinity
B	Y	737	D	12.6	-0.089	Reduced affinity
B	Y	737	F	12.6	-0.579	Reduced affinity
B	N	738	S	7.9	-0.636	Reduced affinity
B	P	740	L	21.6	1.559	Increased affinity
B	L	741	S	77.7	1.266	Increased affinity
B	V	742	G	27.7	1.321	Increased affinity
B	N	745	S	0.7	0.339	Increased affinity
B	A	746	D	38.1	0.022	Increased affinity
B	A	746	V	38.1	0.488	Increased affinity
B	E	747	A	64.3	0.398	Increased affinity
B	L	748	A	12.3	1.44	Increased affinity
B	L	748	F	12.3	1.652	Increased affinity
B	L	748	I	12.3	1.384	Increased affinity
B	L	748	P	12.3	1.406	Increased affinity
B	L	748	S	12.3	1.855	Increased affinity
B	K	752	H	31.9	-0.369	Reduced affinity
B	K	752	Q	31.9	-0.327	Reduced affinity
B	I	755	L	0	-0.036	Reduced affinity
B	I	755	V	0	-0.037	Reduced affinity
B	H	756	Y	16.7	-0.021	Reduced affinity
B	I	757	T	23.6	0.262	Increased affinity
B	I	757	V	23.6	-0.183	Reduced affinity
B	P	760	L	19	0.141	Increased affinity
B	P	760	S	19	0.025	Increased affinity
B	A	762	V	46.7	0.124	Increased affinity
B	V	764	A	43.6	-0.206	Reduced affinity
B	T	765	I	46.4	0.125	Increased affinity
B	R	767	M	40.4	-0.01	Reduced affinity
B	R	767	V	40.4	0.06	Increased affinity
B	V	768	G	32	-0.125	Reduced affinity
B	K	770	R	39.7	-0.146	Reduced affinity
B	A	771	V	16.9	0.14	Increased affinity
B	R	772	G	76.1	0.038	Increased affinity
B	N	773	I	90.6	0.297	Increased affinity
B	T	775	P	77.7	-0.029	Reduced affinity
B	T	777	A	74.7	-0.004	Reduced affinity
B	T	777	M	74.7	-0.793	Reduced affinity
B	T	777	S	74.7	0.123	Increased affinity
B	G	779	E	44.3	0.845	Increased affinity
B	G	779	R	44.3	-0.352	Reduced affinity
B	K	780	R	82.2	-0.559	Reduced affinity
B	N	781	K	67.8	-0.248	Reduced affinity
B	Q	782	K	41.9	-0.385	Reduced affinity
B	I	784	T	27.1	0.119	Increased affinity
B	I	784	V	27.1	0.093	Increased affinity
B	M	785	L	0.5	-0.514	Reduced affinity
B	L	786	S	50.9	-0.072	Reduced affinity
B	L	786	V	50.9	-0.047	Reduced affinity
B	Y	788	C	56.4	-0.247	Reduced affinity
B	Y	788	H	56.4	-0.33	Reduced affinity
B	L	794	F	34.4	0.443	Increased affinity
B	Y	797	C	23	-0.429	Reduced affinity
B	Y	797	F	23	0.111	Increased affinity
B	N	799	K	30.1	-0.118	Reduced affinity
B	N	799	S	30.1	-0.064	Reduced affinity
B	E	802	Q	89.4	-0.211	Reduced affinity
B	E	803	K	91.6	-0.538	Reduced affinity
B	P	804	S	19.7	-0.009	Reduced affinity
B	P	804	T	19.7	-0.016	Reduced affinity
B	N	805	H	85.6	-1.039	Reduced affinity
B	Y	806	S	14.4	0.065	Increased affinity
B	Q	807	H	55.4	-0.812	Reduced affinity
B	Q	807	L	55.4	-0.13	Reduced affinity
B	Q	807	R	55.4	-0.741	Reduced affinity
B	Q	807	S	55.4	-0.091	Reduced affinity
B	E	808	H	48.6	-0.806	Reduced affinity
B	E	808	K	48.6	-0.406	Reduced affinity
B	E	808	Q	48.6	-0.174	Reduced affinity
B	E	809	Q	41.6	-0.306	Reduced affinity
B	M	812	A	55.4	0.123	Increased affinity
B	M	812	T	55.4	0.02	Increased affinity
B	H	813	L	97.4	0.183	Increased affinity
B	H	813	P	97.4	0.183	Increased affinity
B	H	813	R	97.4	-0.124	Reduced affinity
B	H	813	Y	97.4	0.157	Increased affinity
B	K	814	R	73.8	-0.17	Reduced affinity
B	E	816	G	65.7	-0.069	Reduced affinity
B	E	816	K	65.7	-0.05	Reduced affinity
B	V	817	I	14.1	-0.204	Reduced affinity
B	V	818	A	47.5	-0.126	Reduced affinity
B	V	818	M	47.5	-0.415	Reduced affinity
B	V	818	R	47.5	-0.224	Reduced affinity
B	V	818	T	47.5	-0.095	Reduced affinity
B	L	819	I	9.2	-0.363	Reduced affinity
B	L	819	V	9.2	-0.452	Reduced affinity
B	T	820	A	84.4	-0.166	Reduced affinity
B	T	820	I	84.4	0.103	Increased affinity
B	V	821	G	0	-0.336	Reduced affinity
B	V	828	A	0	-0.188	Reduced affinity
B	V	828	I	0	0.179	Increased affinity
B	W	830	C	0.9	-0.092	Reduced affinity
B	G	831	D	26.6	0.866	Increased affinity
B	N	833	K	12.4	0.305	Increased affinity
B	E	834	G	82.1	-0.561	Reduced affinity
B	E	834	V	82.1	-0.414	Reduced affinity
B	P	835	L	22.4	-0.002	Reduced affinity
B	K	837	E	33.7	1.689	Increased affinity
B	K	837	R	33.7	-0.127	Reduced affinity
B	Q	841	H	14.8	-0.988	Reduced affinity
B	L	842	M	74.3	-2.232	Reduced affinity
D	N	507	D	18.2	0.482	Increased affinity
D	N	507	T	18.2	0.206	Increased affinity
D	V	508	A	97	-0.119	Reduced affinity
D	A	511	V	99	0.027	Increased affinity
D	T	512	I	58.5	0.442	Increased affinity
D	R	513	K	62.4	0.41	Increased affinity
D	P	514	Q	0.3	0.197	Increased affinity
D	H	518	P	19	0.005	Increased affinity
D	H	518	Q	19	0.101	Increased affinity
D	H	518	R	19	0.098	Increased affinity
D	C	519	G	0	-0.284	Reduced affinity
D	C	519	R	0	-0.132	Reduced affinity
D	D	521	V	34.8	-0.398	Reduced affinity
D	G	523	A	80.4	0.188	Increased affinity
D	G	523	E	80.4	0.657	Increased affinity
D	H	526	Y	86.3	0.33	Increased affinity
D	S	527	P	20.5	0.413	Increased affinity
D	V	532	I	0	-0.017	Reduced affinity
D	A	533	V	0	-0.006	Reduced affinity
D	L	534	I	0	0	Increased affinity
D	R	536	H	5.2	-0.274	Reduced affinity
D	I	537	L	0	-0.017	Reduced affinity
D	I	537	V	0	-0.018	Reduced affinity
D	N	539	S	61.8	-0.248	Reduced affinity
D	T	542	I	40.2	0.165	Increased affinity
D	T	545	R	3.4	-0.203	Reduced affinity
D	L	546	Q	0.6	0.087	Increased affinity
D	K	547	H	4.8	-0.198	Reduced affinity
D	K	547	N	4.8	-0.07	Reduced affinity
D	I	548	L	0	-0.001	Reduced affinity
D	V	550	I	0	0	Increased affinity
D	L	552	F	0	-0.022	Reduced affinity
D	I	554	L	0.6	-0.072	Reduced affinity
D	G	555	R	14.4	0.015	Increased affinity
D	I	556	L	0	-0.246	Reduced affinity
D	I	556	T	0	-0.352	Reduced affinity
D	K	557	G	36.5	-0.189	Reduced affinity
D	K	557	Q	36.5	-0.166	Reduced affinity
D	K	557	R	36.5	-0.229	Reduced affinity
D	D	560	G	28.5	-0.206	Reduced affinity
D	S	561	G	52.1	-0.01	Reduced affinity
D	S	561	N	52.1	0.012	Increased affinity
D	H	562	Y	45.6	0.341	Increased affinity
D	D	563	G	42.7	-0.202	Reduced affinity
D	W	564	R	88.6	-0.203	Reduced affinity
D	K	566	E	29.9	0.204	Increased affinity
D	Y	569	H	4	-0.38	Reduced affinity
D	Y	569	I	4	-0.367	Reduced affinity
D	N	572	S	37.2	0.087	Increased affinity
D	N	572	T	37.2	0.104	Increased affinity
D	H	573	Y	29.1	0.076	Increased affinity
D	M	574	L	20.1	0.216	Increased affinity
D	M	574	I	20.1	0.216	Increased affinity
D	M	574	T	20.1	0.068	Increased affinity
D	M	574	V	20.1	0.198	Increased affinity
D	A	576	T	39.5	-0.217	Reduced affinity
D	E	579	G	66.6	-0.356	Reduced affinity
D	A	581	V	105.3	0.078	Increased affinity
D	G	582	R	44.7	0.013	Increased affinity
D	L	583	I	0	-0.011	Reduced affinity
D	F	584	L	44.3	-0.798	Reduced affinity
D	F	584	I	44.3	-0.798	Reduced affinity
D	F	584	S	44.3	-0.771	Reduced affinity
D	V	585	A	0	-0.049	Reduced affinity
D	R	586	K	42.1	0.256	Increased affinity
D	T	587	S	0	-0.199	Reduced affinity
D	S	588	L	64.8	0.124	Increased affinity
D	A	589	S	58.1	-0.042	Reduced affinity
D	P	590	L	71.9	0.048	Increased affinity
D	P	590	S	71.9	-0.055	Reduced affinity
D	T	592	A	92.7	-0.007	Reduced affinity
D	T	592	M	92.7	0.005	Increased affinity
D	T	592	S	92.7	-0.051	Reduced affinity
D	T	594	I	32.3	0.33	Increased affinity
D	M	597	T	25.9	-0.18	Reduced affinity
D	A	603	T	0	0.344	Increased affinity
D	K	607	R	75.6	-0.071	Reduced affinity
D	G	608	R	19.2	-0.001	Reduced affinity
D	T	610	I	53.5	0.308	Increased affinity
D	T	610	S	53.5	-0.347	Reduced affinity
D	L	611	M	0	0.182	Increased affinity
D	L	611	V	0	-0.125	Reduced affinity
D	V	613	A	0	-0.038	Reduced affinity
D	F	615	L	0	-0.203	Reduced affinity
D	T	616	I	41.7	0.06	Increased affinity
D	S	618	G	77.8	-0.003	Reduced affinity
D	R	619	S	64.8	0.043	Increased affinity
D	R	619	W	64.8	0.07	Increased affinity
D	K	620	M	89.2	0.02	Increased affinity
D	K	620	N	89.2	0.013	Increased affinity
D	K	620	S	89.2	0.057	Increased affinity
D	I	621	F	68.1	0.067	Increased affinity
D	I	621	L	68.1	0.002	Increased affinity
D	I	621	M	68.1	-0.188	Reduced affinity
D	I	621	N	68.1	-0.17	Reduced affinity
D	I	621	S	68.1	-0.079	Reduced affinity
D	I	621	T	68.1	-0.076	Reduced affinity
D	I	621	V	68.1	-0.012	Reduced affinity
D	S	622	G	59.8	-0.016	Reduced affinity
D	S	622	Q	59.8	0.026	Increased affinity
D	S	622	R	59.8	-0.067	Reduced affinity
D	H	623	L	33.5	-0.121	Reduced affinity
D	H	623	P	33.5	-0.168	Reduced affinity
D	H	623	R	33.5	-0.207	Reduced affinity
D	H	623	T	33.5	-0.251	Reduced affinity
D	S	624	T	27.6	-0.015	Reduced affinity
D	T	626	M	26	0.145	Increased affinity
D	P	628	S	37.1	0.758	Increased affinity
D	H	630	R	71.3	-0.188	Reduced affinity
D	H	631	L	5.3	0.023	Increased affinity
D	H	631	Y	5.3	0.36	Increased affinity
D	D	632	N	48.5	-0.083	Reduced affinity
D	D	632	E	48.5	0.001	Increased affinity
D	P	633	S	38.4	-0.111	Reduced affinity
D	P	634	L	67.2	0.001	Increased affinity
D	V	635	A	110.1	-0.057	Reduced affinity
D	V	635	G	110.1	-0.065	Reduced affinity
D	V	635	M	110.1	-0.156	Reduced affinity
D	K	640	R	90.2	-0.087	Reduced affinity
D	H	642	Y	84.1	0.054	Increased affinity
D	S	643	A	24.9	0.109	Increased affinity
D	S	643	Y	24.9	0.128	Increased affinity
D	Q	646	H	88.7	-0.365	Reduced affinity
D	Q	646	R	88.7	-0.605	Reduced affinity
D	H	647	Q	82.5	0.267	Increased affinity
D	H	647	Y	82.5	0.645	Increased affinity
D	K	649	E	33.4	0.108	Increased affinity
D	K	649	R	33.4	-0.118	Reduced affinity
D	E	650	D	60.7	-0.057	Reduced affinity
D	L	651	M	46.6	-0.562	Reduced affinity
D	P	652	L	57.5	-0.023	Reduced affinity
D	P	652	S	57.5	-0.115	Reduced affinity
D	P	652	T	57.5	-0.062	Reduced affinity
D	T	655	S	59.7	-0.135	Reduced affinity
D	Y	656	H	72.2	-0.449	Reduced affinity
D	V	657	A	45.2	-0.166	Reduced affinity
D	V	657	T	45.2	-0.065	Reduced affinity
D	Q	658	H	96.6	0.088	Increased affinity
D	Q	658	R	96.6	-0.059	Reduced affinity
D	S	659	N	70	-0.021	Reduced affinity
D	T	660	N	26.1	-0.332	Reduced affinity
D	A	662	V	2.9	-0.16	Reduced affinity
D	T	664	I	56.9	0.269	Increased affinity
D	T	664	A	56.9	-0.018	Reduced affinity
D	E	665	D	13.8	-0.115	Reduced affinity
D	E	666	D	43.1	-0.209	Reduced affinity
D	I	667	M	2.9	0.094	Increased affinity
D	I	667	T	2.9	0.094	Increased affinity
D	I	667	V	2.9	-0.366	Reduced affinity
D	H	670	N	3.6	-0.012	Reduced affinity
D	M	671	V	4.3	-0.036	Reduced affinity
D	D	674	G	2.1	0.278	Increased affinity
D	R	678	H	7.9	0	Increased affinity
D	T	679	A	84.6	0.005	Increased affinity
D	L	680	I	7.6	0	Increased affinity
D	M	681	L	0.6	0	Increased affinity
D	M	681	T	0.6	0	Increased affinity
D	M	681	V	0.6	0	Increased affinity
D	S	682	L	61.5	0	Increased affinity
D	S	682	T	61.5	0	Increased affinity
D	Q	684	R	6.6	0	Increased affinity
D	S	685	A	0.8	0	Increased affinity
D	S	685	C	0.8	0	Increased affinity
D	S	685	Y	0.8	0	Increased affinity
D	G	686	S	0	0	Increased affinity
D	N	687	S	0	0	Increased affinity
D	K	689	T	34.3	0	Increased affinity
D	T	691	A	42.5	0	Increased affinity
D	T	691	I	42.5	0	Increased affinity
D	T	691	S	42.5	0	Increased affinity
D	G	694	C	113.4	-0.243	Reduced affinity
D	G	694	S	113.4	0.116	Increased affinity
D	G	694	N	113.4	0.238	Increased affinity
D	Q	695	R	49.7	-0.057	Reduced affinity
D	V	697	A	0	0.001	Increased affinity
D	V	697	E	0	0	Increased affinity
D	R	698	Q	31.4	0.009	Increased affinity
D	K	700	R	33	0	Increased affinity
D	N	702	D	27.9	0	Increased affinity
D	N	702	I	27.9	0	Increased affinity
D	N	702	S	27.9	0	Increased affinity
D	G	705	D	41.9	0	Increased affinity
D	G	705	S	41.9	0	Increased affinity
D	S	706	L	56.9	0	Increased affinity
D	N	707	D	45.8	0	Increased affinity
D	N	707	H	45.8	0	Increased affinity
D	N	707	S	45.8	0	Increased affinity
D	N	707	T	45.8	0	Increased affinity
D	E	708	D	86.6	0	Increased affinity
D	L	710	I	44.6	0.296	Increased affinity
D	L	710	Q	44.6	-0.199	Reduced affinity
D	L	710	S	44.6	-0.172	Reduced affinity
D	L	710	T	44.6	-0.163	Reduced affinity
D	L	710	V	44.6	0.272	Increased affinity
D	T	711	I	4.2	0.162	Increased affinity
D	T	713	I	71.1	0.365	Increased affinity
D	T	713	R	71.1	-0.067	Reduced affinity
D	D	714	N	36.4	0	Increased affinity
D	V	716	E	2.1	0	Increased affinity
D	V	716	M	2.1	0	Increased affinity
D	I	717	V	0.5	0	Increased affinity
D	N	718	G	0	0	Increased affinity
D	N	718	S	0	0	Increased affinity
D	N	719	S	0.4	0	Increased affinity
D	K	721	G	64.2	0	Increased affinity
D	K	721	I	64.2	0	Increased affinity
D	K	721	R	64.2	0	Increased affinity
D	V	722	I	34.3	0	Increased affinity
D	H	726	Y	6.8	0	Increased affinity
D	A	727	T	0.4	0	Increased affinity
D	A	727	V	0.4	0	Increased affinity
D	A	728	E	4.2	0.001	Increased affinity
D	A	728	T	4.2	0.003	Increased affinity
D	V	729	I	11.1	0.223	Increased affinity
D	N	731	D	0.3	0	Increased affinity
D	K	733	E	0	0.108	Increased affinity
D	K	733	R	0	-0.1	Reduced affinity
D	K	734	N	0	-0.03	Reduced affinity
D	K	734	R	0	-0.027	Reduced affinity
D	Y	737	C	12.6	0.248	Increased affinity
D	Y	737	D	12.6	-0.089	Reduced affinity
D	Y	737	F	12.6	-0.579	Reduced affinity
D	N	738	S	7.9	-0.636	Reduced affinity
D	P	740	L	21.6	1.56	Increased affinity
D	L	741	S	77.7	1.488	Increased affinity
D	V	742	G	27.7	1.356	Increased affinity
D	N	745	S	0.7	0.339	Increased affinity
D	A	746	D	38.1	0.022	Increased affinity
D	A	746	V	38.1	0.488	Increased affinity
D	E	747	A	64.3	0.398	Increased affinity
D	L	748	A	12.3	1.439	Increased affinity
D	L	748	F	12.3	1.651	Increased affinity
D	L	748	I	12.3	1.383	Increased affinity
D	L	748	P	12.3	1.405	Increased affinity
D	L	748	S	12.3	1.854	Increased affinity
D	K	752	H	31.9	-0.369	Reduced affinity
D	K	752	Q	31.9	-0.327	Reduced affinity
D	I	755	L	0	-0.036	Reduced affinity
D	I	755	V	0	-0.037	Reduced affinity
D	H	756	Y	16.7	-0.021	Reduced affinity
D	I	757	T	23.6	0.263	Increased affinity
D	I	757	V	23.6	-0.183	Reduced affinity
D	P	760	L	19	0.141	Increased affinity
D	P	760	S	19	0.025	Increased affinity
D	A	762	V	46.7	0.124	Increased affinity
D	V	764	A	43.6	-0.206	Reduced affinity
D	T	765	I	46.4	0.125	Increased affinity
D	R	767	M	40.4	-0.002	Reduced affinity
D	R	767	V	40.4	0.107	Increased affinity
D	V	768	G	32	-0.132	Reduced affinity
D	K	770	R	39.7	-0.279	Reduced affinity
D	A	771	V	16.9	0.003	Increased affinity
D	R	772	G	76.1	0	Increased affinity
D	N	773	I	90.6	0.003	Increased affinity
D	T	775	P	77.7	0	Increased affinity
D	T	777	A	74.7	0.07	Increased affinity
D	T	777	M	74.7	-1.024	Reduced affinity
D	T	777	S	74.7	0.348	Increased affinity
D	G	779	E	44.3	0.844	Increased affinity
D	G	779	R	44.3	-0.353	Reduced affinity
D	K	780	R	82.2	-0.559	Reduced affinity
D	N	781	K	67.8	-0.249	Reduced affinity
D	Q	782	K	41.9	-0.386	Reduced affinity
D	I	784	T	27.1	0.346	Increased affinity
D	I	784	V	27.1	0.425	Increased affinity
D	M	785	L	0.5	0	Increased affinity
D	L	786	S	50.9	0	Increased affinity
D	L	786	V	50.9	0	Increased affinity
D	Y	788	C	56.4	0	Increased affinity
D	Y	788	H	56.4	0	Increased affinity
D	L	794	F	34.4	0.447	Increased affinity
D	Y	797	C	23	-0.429	Reduced affinity
D	Y	797	F	23	0.111	Increased affinity
D	N	799	K	30.1	-0.119	Reduced affinity
D	N	799	S	30.1	-0.064	Reduced affinity
D	E	802	Q	89.4	-0.211	Reduced affinity
D	E	803	K	91.6	-0.538	Reduced affinity
D	P	804	S	19.7	-0.01	Reduced affinity
D	P	804	T	19.7	-0.017	Reduced affinity
D	N	805	H	85.6	-1.04	Reduced affinity
D	Y	806	S	14.4	0.065	Increased affinity
D	Q	807	H	55.4	-0.812	Reduced affinity
D	Q	807	L	55.4	-0.13	Reduced affinity
D	Q	807	R	55.4	-0.742	Reduced affinity
D	Q	807	S	55.4	-0.091	Reduced affinity
D	E	808	H	48.6	-0.793	Reduced affinity
D	E	808	K	48.6	-0.03	Reduced affinity
D	E	808	Q	48.6	0.633	Increased affinity
D	E	809	Q	41.6	-0.339	Reduced affinity
D	M	812	A	55.4	0	Increased affinity
D	M	812	T	55.4	0	Increased affinity
D	H	813	L	97.4	0	Increased affinity
D	H	813	P	97.4	0	Increased affinity
D	H	813	R	97.4	0	Increased affinity
D	H	813	Y	97.4	0	Increased affinity
D	K	814	R	73.8	0	Increased affinity
D	E	816	G	65.7	0	Increased affinity
D	E	816	K	65.7	0	Increased affinity
D	V	817	I	14.1	0.003	Increased affinity
D	V	818	A	47.5	-0.126	Reduced affinity
D	V	818	M	47.5	-0.415	Reduced affinity
D	V	818	R	47.5	-0.224	Reduced affinity
D	V	818	T	47.5	-0.095	Reduced affinity
D	L	819	I	9.2	-0.363	Reduced affinity
D	L	819	V	9.2	-0.452	Reduced affinity
D	T	820	A	84.4	-0.165	Reduced affinity
D	T	820	I	84.4	0.104	Increased affinity
D	V	821	G	0	-0.336	Reduced affinity
D	V	828	A	0	-0.188	Reduced affinity
D	V	828	I	0	0.179	Increased affinity
D	W	830	C	0.9	0.001	Increased affinity
D	G	831	D	26.6	0.867	Increased affinity
D	N	833	K	12.4	0.259	Increased affinity
D	E	834	G	82.1	-0.567	Reduced affinity
D	E	834	V	82.1	-0.42	Reduced affinity
D	P	835	L	22.4	-0.002	Reduced affinity
D	K	837	E	33.7	1.689	Increased affinity
D	K	837	R	33.7	-0.128	Reduced affinity
D	Q	841	H	14.8	-0.989	Reduced affinity
D	L	842	M	74.3	-2.232	Reduced affinity
F	N	507	D	18.2	0.481	Increased affinity
F	N	507	T	18.2	0.206	Increased affinity
F	V	508	A	97	-0.119	Reduced affinity
F	A	511	V	99	0.027	Increased affinity
F	T	512	I	58.5	0.442	Increased affinity
F	R	513	K	62.4	0.41	Increased affinity
F	P	514	Q	0.3	0.197	Increased affinity
F	H	518	P	19	0.005	Increased affinity
F	H	518	Q	19	0.101	Increased affinity
F	H	518	R	19	0.098	Increased affinity
F	C	519	G	0	-0.284	Reduced affinity
F	C	519	R	0	-0.132	Reduced affinity
F	D	521	V	34.8	-0.398	Reduced affinity
F	G	523	A	80.4	0.188	Increased affinity
F	G	523	E	80.4	0.657	Increased affinity
F	H	526	Y	86.3	0.327	Increased affinity
F	S	527	P	20.5	0.413	Increased affinity
F	V	532	I	0	-0.017	Reduced affinity
F	A	533	V	0	-0.006	Reduced affinity
F	L	534	I	0	0	Increased affinity
F	R	536	H	5.2	-0.274	Reduced affinity
F	I	537	L	0	-0.017	Reduced affinity
F	I	537	V	0	-0.018	Reduced affinity
F	N	539	S	61.8	-0.248	Reduced affinity
F	T	542	I	40.2	0.165	Increased affinity
F	T	545	R	3.4	-0.203	Reduced affinity
F	L	546	Q	0.6	0.087	Increased affinity
F	K	547	H	4.8	-0.199	Reduced affinity
F	K	547	N	4.8	-0.07	Reduced affinity
F	I	548	L	0	-0.001	Reduced affinity
F	V	550	I	0	0	Increased affinity
F	L	552	F	0	-0.022	Reduced affinity
F	I	554	L	0.6	-0.072	Reduced affinity
F	G	555	R	14.4	0.014	Increased affinity
F	I	556	L	0	-0.246	Reduced affinity
F	I	556	T	0	-0.352	Reduced affinity
F	K	557	G	36.5	-0.189	Reduced affinity
F	K	557	Q	36.5	-0.166	Reduced affinity
F	K	557	R	36.5	-0.229	Reduced affinity
F	D	560	G	28.5	-0.205	Reduced affinity
F	S	561	G	52.1	-0.01	Reduced affinity
F	S	561	N	52.1	0.012	Increased affinity
F	H	562	Y	45.6	0.337	Increased affinity
F	D	563	G	42.7	-0.202	Reduced affinity
F	W	564	R	88.6	-0.203	Reduced affinity
F	K	566	E	29.9	0.204	Increased affinity
F	Y	569	H	4	-0.381	Reduced affinity
F	Y	569	I	4	-0.367	Reduced affinity
F	N	572	S	37.2	0.087	Increased affinity
F	N	572	T	37.2	0.105	Increased affinity
F	H	573	Y	29.1	0.076	Increased affinity
F	M	574	L	20.1	0.216	Increased affinity
F	M	574	I	20.1	0.216	Increased affinity
F	M	574	T	20.1	0.068	Increased affinity
F	M	574	V	20.1	0.199	Increased affinity
F	A	576	T	39.5	-0.217	Reduced affinity
F	E	579	G	66.6	-0.356	Reduced affinity
F	A	581	V	105.3	0.078	Increased affinity
F	G	582	R	44.7	0.013	Increased affinity
F	L	583	I	0	-0.011	Reduced affinity
F	F	584	L	44.3	-0.798	Reduced affinity
F	F	584	I	44.3	-0.798	Reduced affinity
F	F	584	S	44.3	-0.771	Reduced affinity
F	V	585	A	0	-0.049	Reduced affinity
F	R	586	K	42.1	0.255	Increased affinity
F	T	587	S	0	-0.199	Reduced affinity
F	S	588	L	64.8	0.124	Increased affinity
F	A	589	S	58.1	-0.042	Reduced affinity
F	P	590	L	71.9	0.048	Increased affinity
F	P	590	S	71.9	-0.054	Reduced affinity
F	T	592	A	92.7	-0.008	Reduced affinity
F	T	592	M	92.7	0.005	Increased affinity
F	T	592	S	92.7	-0.051	Reduced affinity
F	T	594	I	32.3	0.33	Increased affinity
F	M	597	T	25.9	-0.18	Reduced affinity
F	A	603	T	0	0.344	Increased affinity
F	K	607	R	75.6	-0.071	Reduced affinity
F	G	608	R	19.2	0	Increased affinity
F	T	610	I	53.5	0.308	Increased affinity
F	T	610	S	53.5	-0.347	Reduced affinity
F	L	611	M	0	0.182	Increased affinity
F	L	611	V	0	-0.125	Reduced affinity
F	V	613	A	0	-0.038	Reduced affinity
F	F	615	L	0	-0.203	Reduced affinity
F	T	616	I	41.7	0.06	Increased affinity
F	S	618	G	77.8	-0.003	Reduced affinity
F	R	619	S	64.8	0.043	Increased affinity
F	R	619	W	64.8	0.071	Increased affinity
F	K	620	M	89.2	0.02	Increased affinity
F	K	620	N	89.2	0.013	Increased affinity
F	K	620	S	89.2	0.057	Increased affinity
F	I	621	F	68.1	0.067	Increased affinity
F	I	621	L	68.1	0.002	Increased affinity
F	I	621	M	68.1	-0.187	Reduced affinity
F	I	621	N	68.1	-0.17	Reduced affinity
F	I	621	S	68.1	-0.079	Reduced affinity
F	I	621	T	68.1	-0.076	Reduced affinity
F	I	621	V	68.1	-0.011	Reduced affinity
F	S	622	G	59.8	-0.016	Reduced affinity
F	S	622	Q	59.8	0.026	Increased affinity
F	S	622	R	59.8	-0.067	Reduced affinity
F	H	623	L	33.5	-0.121	Reduced affinity
F	H	623	P	33.5	-0.168	Reduced affinity
F	H	623	R	33.5	-0.206	Reduced affinity
F	H	623	T	33.5	-0.251	Reduced affinity
F	S	624	T	27.6	-0.015	Reduced affinity
F	T	626	M	26	0.145	Increased affinity
F	P	628	S	37.1	0.758	Increased affinity
F	H	630	R	71.3	-0.188	Reduced affinity
F	H	631	L	5.3	0.023	Increased affinity
F	H	631	Y	5.3	0.36	Increased affinity
F	D	632	N	48.5	-0.083	Reduced affinity
F	D	632	E	48.5	0.001	Increased affinity
F	P	633	S	38.4	-0.111	Reduced affinity
F	P	634	L	67.2	0.001	Increased affinity
F	V	635	A	110.1	-0.057	Reduced affinity
F	V	635	G	110.1	-0.065	Reduced affinity
F	V	635	M	110.1	-0.156	Reduced affinity
F	K	640	R	90.2	-0.087	Reduced affinity
F	H	642	Y	84.1	0.054	Increased affinity
F	S	643	A	24.9	0.109	Increased affinity
F	S	643	Y	24.9	0.128	Increased affinity
F	Q	646	H	88.7	-0.365	Reduced affinity
F	Q	646	R	88.7	-0.605	Reduced affinity
F	H	647	Q	82.5	0.267	Increased affinity
F	H	647	Y	82.5	0.645	Increased affinity
F	K	649	E	33.4	0.108	Increased affinity
F	K	649	R	33.4	-0.118	Reduced affinity
F	E	650	D	60.7	-0.057	Reduced affinity
F	L	651	M	46.6	-0.562	Reduced affinity
F	P	652	L	57.5	-0.023	Reduced affinity
F	P	652	S	57.5	-0.115	Reduced affinity
F	P	652	T	57.5	-0.061	Reduced affinity
F	T	655	S	59.7	-0.135	Reduced affinity
F	Y	656	H	72.2	-0.449	Reduced affinity
F	V	657	A	45.2	-0.166	Reduced affinity
F	V	657	T	45.2	-0.065	Reduced affinity
F	Q	658	H	96.6	0.088	Increased affinity
F	Q	658	R	96.6	-0.059	Reduced affinity
F	S	659	N	70	-0.021	Reduced affinity
F	T	660	N	26.1	-0.331	Reduced affinity
F	A	662	V	2.9	-0.16	Reduced affinity
F	T	664	I	56.9	0.269	Increased affinity
F	T	664	A	56.9	-0.018	Reduced affinity
F	E	665	D	13.8	-0.116	Reduced affinity
F	E	666	D	43.1	-0.209	Reduced affinity
F	I	667	M	2.9	0.094	Increased affinity
F	I	667	T	2.9	0.094	Increased affinity
F	I	667	V	2.9	-0.366	Reduced affinity
F	H	670	N	3.6	-0.012	Reduced affinity
F	M	671	V	4.3	-0.036	Reduced affinity
F	D	674	G	2.1	0.278	Increased affinity
F	R	678	H	7.9	0	Increased affinity
F	T	679	A	84.6	0.038	Increased affinity
F	L	680	I	7.6	0	Increased affinity
F	M	681	L	0.6	0	Increased affinity
F	M	681	T	0.6	0	Increased affinity
F	M	681	V	0.6	0	Increased affinity
F	S	682	L	61.5	0	Increased affinity
F	S	682	T	61.5	0	Increased affinity
F	Q	684	R	6.6	0	Increased affinity
F	S	685	A	0.8	0	Increased affinity
F	S	685	C	0.8	0	Increased affinity
F	S	685	Y	0.8	0	Increased affinity
F	G	686	S	0	0	Increased affinity
F	N	687	S	0	0	Increased affinity
F	K	689	T	34.3	0	Increased affinity
F	T	691	A	42.5	0	Increased affinity
F	T	691	I	42.5	0	Increased affinity
F	T	691	S	42.5	0	Increased affinity
F	G	694	C	113.4	-0.122	Reduced affinity
F	G	694	S	113.4	0.118	Increased affinity
F	G	694	N	113.4	0.212	Increased affinity
F	Q	695	R	49.7	-0.058	Reduced affinity
F	V	697	A	0	0.001	Increased affinity
F	V	697	E	0	0	Increased affinity
F	R	698	Q	31.4	0.015	Increased affinity
F	K	700	R	33	0	Increased affinity
F	N	702	D	27.9	0	Increased affinity
F	N	702	I	27.9	0	Increased affinity
F	N	702	S	27.9	0	Increased affinity
F	G	705	D	41.9	0	Increased affinity
F	G	705	S	41.9	0	Increased affinity
F	S	706	L	56.9	0	Increased affinity
F	N	707	D	45.8	0	Increased affinity
F	N	707	H	45.8	0	Increased affinity
F	N	707	S	45.8	0	Increased affinity
F	N	707	T	45.8	0	Increased affinity
F	E	708	D	86.6	0	Increased affinity
F	L	710	I	44.6	0.126	Increased affinity
F	L	710	Q	44.6	-0.2	Reduced affinity
F	L	710	S	44.6	-0.262	Reduced affinity
F	L	710	T	44.6	-0.233	Reduced affinity
F	L	710	V	44.6	0.078	Increased affinity
F	T	711	I	4.2	0.241	Increased affinity
F	T	713	I	71.1	0.702	Increased affinity
F	T	713	R	71.1	-0.559	Reduced affinity
F	D	714	N	36.4	0	Increased affinity
F	V	716	E	2.1	0	Increased affinity
F	V	716	M	2.1	0	Increased affinity
F	I	717	V	0.5	0	Increased affinity
F	N	718	G	0	0	Increased affinity
F	N	718	S	0	0	Increased affinity
F	N	719	S	0.4	0	Increased affinity
F	K	721	G	64.2	0	Increased affinity
F	K	721	I	64.2	0	Increased affinity
F	K	721	R	64.2	0	Increased affinity
F	V	722	I	34.3	0	Increased affinity
F	H	726	Y	6.8	0	Increased affinity
F	A	727	T	0.4	0	Increased affinity
F	A	727	V	0.4	0	Increased affinity
F	A	728	E	4.2	0.001	Increased affinity
F	A	728	T	4.2	0.003	Increased affinity
F	V	729	I	11.1	0.223	Increased affinity
F	N	731	D	0.3	0	Increased affinity
F	K	733	E	0	0.097	Increased affinity
F	K	733	R	0	-0.105	Reduced affinity
F	K	734	N	0	-0.031	Reduced affinity
F	K	734	R	0	-0.028	Reduced affinity
F	Y	737	C	12.6	0.248	Increased affinity
F	Y	737	D	12.6	-0.089	Reduced affinity
F	Y	737	F	12.6	-0.579	Reduced affinity
F	N	738	S	7.9	-0.637	Reduced affinity
F	P	740	L	21.6	1.561	Increased affinity
F	L	741	S	77.7	1.488	Increased affinity
F	V	742	G	27.7	1.355	Increased affinity
F	N	745	S	0.7	0.339	Increased affinity
F	A	746	D	38.1	0.022	Increased affinity
F	A	746	V	38.1	0.488	Increased affinity
F	E	747	A	64.3	0.398	Increased affinity
F	L	748	A	12.3	1.44	Increased affinity
F	L	748	F	12.3	1.652	Increased affinity
F	L	748	I	12.3	1.384	Increased affinity
F	L	748	P	12.3	1.406	Increased affinity
F	L	748	S	12.3	1.854	Increased affinity
F	K	752	H	31.9	-0.369	Reduced affinity
F	K	752	Q	31.9	-0.327	Reduced affinity
F	I	755	L	0	-0.036	Reduced affinity
F	I	755	V	0	-0.037	Reduced affinity
F	H	756	Y	16.7	-0.021	Reduced affinity
F	I	757	T	23.6	0.262	Increased affinity
F	I	757	V	23.6	-0.183	Reduced affinity
F	P	760	L	19	0.141	Increased affinity
F	P	760	S	19	0.025	Increased affinity
F	A	762	V	46.7	0.124	Increased affinity
F	V	764	A	43.6	-0.206	Reduced affinity
F	T	765	I	46.4	0.125	Increased affinity
F	R	767	M	40.4	-0.002	Reduced affinity
F	R	767	V	40.4	0.107	Increased affinity
F	V	768	G	32	-0.132	Reduced affinity
F	K	770	R	39.7	-0.279	Reduced affinity
F	A	771	V	16.9	0.003	Increased affinity
F	R	772	G	76.1	0	Increased affinity
F	N	773	I	90.6	0.003	Increased affinity
F	T	775	P	77.7	0	Increased affinity
F	T	777	A	74.7	0.07	Increased affinity
F	T	777	M	74.7	-1.024	Reduced affinity
F	T	777	S	74.7	0.348	Increased affinity
F	G	779	E	44.3	0.844	Increased affinity
F	G	779	R	44.3	-0.353	Reduced affinity
F	K	780	R	82.2	-0.559	Reduced affinity
F	N	781	K	67.8	-0.249	Reduced affinity
F	Q	782	K	41.9	-0.386	Reduced affinity
F	I	784	T	27.1	0.346	Increased affinity
F	I	784	V	27.1	0.425	Increased affinity
F	M	785	L	0.5	0	Increased affinity
F	L	786	S	50.9	0	Increased affinity
F	L	786	V	50.9	0	Increased affinity
F	Y	788	C	56.4	0	Increased affinity
F	Y	788	H	56.4	0	Increased affinity
F	L	794	F	34.4	0.447	Increased affinity
F	Y	797	C	23	-0.429	Reduced affinity
F	Y	797	F	23	0.111	Increased affinity
F	N	799	K	30.1	-0.119	Reduced affinity
F	N	799	S	30.1	-0.064	Reduced affinity
F	E	802	Q	89.4	-0.211	Reduced affinity
F	E	803	K	91.6	-0.538	Reduced affinity
F	P	804	S	19.7	-0.01	Reduced affinity
F	P	804	T	19.7	-0.017	Reduced affinity
F	N	805	H	85.6	-1.04	Reduced affinity
F	Y	806	S	14.4	0.065	Increased affinity
F	Q	807	H	55.4	-0.812	Reduced affinity
F	Q	807	L	55.4	-0.13	Reduced affinity
F	Q	807	R	55.4	-0.742	Reduced affinity
F	Q	807	S	55.4	-0.091	Reduced affinity
F	E	808	H	48.6	-0.792	Reduced affinity
F	E	808	K	48.6	-0.03	Reduced affinity
F	E	808	Q	48.6	0.633	Increased affinity
F	E	809	Q	41.6	-0.339	Reduced affinity
F	M	812	A	55.4	0	Increased affinity
F	M	812	T	55.4	0	Increased affinity
F	H	813	L	97.4	0	Increased affinity
F	H	813	P	97.4	0	Increased affinity
F	H	813	R	97.4	0	Increased affinity
F	H	813	Y	97.4	0	Increased affinity
F	K	814	R	73.8	0	Increased affinity
F	E	816	G	65.7	0	Increased affinity
F	E	816	K	65.7	0	Increased affinity
F	V	817	I	14.1	0.003	Increased affinity
F	V	818	A	47.5	-0.126	Reduced affinity
F	V	818	M	47.5	-0.415	Reduced affinity
F	V	818	R	47.5	-0.224	Reduced affinity
F	V	818	T	47.5	-0.095	Reduced affinity
F	L	819	I	9.2	-0.363	Reduced affinity
F	L	819	V	9.2	-0.452	Reduced affinity
F	T	820	A	84.4	-0.165	Reduced affinity
F	T	820	I	84.4	0.104	Increased affinity
F	V	821	G	0	-0.336	Reduced affinity
F	V	828	A	0	-0.188	Reduced affinity
F	V	828	I	0	0.179	Increased affinity
F	W	830	C	0.9	0.001	Increased affinity
F	G	831	D	26.6	0.867	Increased affinity
F	N	833	K	12.4	0.259	Increased affinity
F	E	834	G	82.1	-0.567	Reduced affinity
F	E	834	V	82.1	-0.42	Reduced affinity
F	P	835	L	22.4	-0.002	Reduced affinity
F	K	837	E	33.7	1.688	Increased affinity
F	K	837	R	33.7	-0.129	Reduced affinity
F	Q	841	H	14.8	-0.989	Reduced affinity
F	L	842	M	74.3	-2.232	Reduced affinity
H	N	507	D	18.2	0.481	Increased affinity
H	N	507	T	18.2	0.206	Increased affinity
H	V	508	A	97	-0.119	Reduced affinity
H	A	511	V	99	0.027	Increased affinity
H	T	512	I	58.5	0.442	Increased affinity
H	R	513	K	62.4	0.41	Increased affinity
H	P	514	Q	0.3	0.197	Increased affinity
H	H	518	P	19	0.005	Increased affinity
H	H	518	Q	19	0.101	Increased affinity
H	H	518	R	19	0.098	Increased affinity
H	C	519	G	0	-0.284	Reduced affinity
H	C	519	R	0	-0.132	Reduced affinity
H	D	521	V	34.8	-0.398	Reduced affinity
H	G	523	A	80.4	0.188	Increased affinity
H	G	523	E	80.4	0.657	Increased affinity
H	H	526	Y	86.3	0.33	Increased affinity
H	S	527	P	20.5	0.413	Increased affinity
H	V	532	I	0	-0.017	Reduced affinity
H	A	533	V	0	-0.007	Reduced affinity
H	L	534	I	0	0	Increased affinity
H	R	536	H	5.2	-0.274	Reduced affinity
H	I	537	L	0	-0.017	Reduced affinity
H	I	537	V	0	-0.018	Reduced affinity
H	N	539	S	61.8	-0.248	Reduced affinity
H	T	542	I	40.2	0.165	Increased affinity
H	T	545	R	3.4	-0.203	Reduced affinity
H	L	546	Q	0.6	0.087	Increased affinity
H	K	547	H	4.8	-0.199	Reduced affinity
H	K	547	N	4.8	-0.07	Reduced affinity
H	I	548	L	0	-0.001	Reduced affinity
H	V	550	I	0	0	Increased affinity
H	L	552	F	0	-0.022	Reduced affinity
H	I	554	L	0.6	-0.072	Reduced affinity
H	G	555	R	14.4	0.014	Increased affinity
H	I	556	L	0	-0.246	Reduced affinity
H	I	556	T	0	-0.352	Reduced affinity
H	K	557	G	36.5	-0.189	Reduced affinity
H	K	557	Q	36.5	-0.166	Reduced affinity
H	K	557	R	36.5	-0.229	Reduced affinity
H	D	560	G	28.5	-0.205	Reduced affinity
H	S	561	G	52.1	-0.01	Reduced affinity
H	S	561	N	52.1	0.012	Increased affinity
H	H	562	Y	45.6	0.337	Increased affinity
H	D	563	G	42.7	-0.202	Reduced affinity
H	W	564	R	88.6	-0.203	Reduced affinity
H	K	566	E	29.9	0.204	Increased affinity
H	Y	569	H	4	-0.381	Reduced affinity
H	Y	569	I	4	-0.367	Reduced affinity
H	N	572	S	37.2	0.087	Increased affinity
H	N	572	T	37.2	0.105	Increased affinity
H	H	573	Y	29.1	0.076	Increased affinity
H	M	574	L	20.1	0.216	Increased affinity
H	M	574	I	20.1	0.216	Increased affinity
H	M	574	T	20.1	0.068	Increased affinity
H	M	574	V	20.1	0.199	Increased affinity
H	A	576	T	39.5	-0.217	Reduced affinity
H	E	579	G	66.6	-0.356	Reduced affinity
H	A	581	V	105.3	0.078	Increased affinity
H	G	582	R	44.7	0.013	Increased affinity
H	L	583	I	0	-0.011	Reduced affinity
H	F	584	L	44.3	-0.798	Reduced affinity
H	F	584	I	44.3	-0.798	Reduced affinity
H	F	584	S	44.3	-0.771	Reduced affinity
H	V	585	A	0	-0.049	Reduced affinity
H	R	586	K	42.1	0.255	Increased affinity
H	T	587	S	0	-0.199	Reduced affinity
H	S	588	L	64.8	0.124	Increased affinity
H	A	589	S	58.1	-0.042	Reduced affinity
H	P	590	L	71.9	0.048	Increased affinity
H	P	590	S	71.9	-0.054	Reduced affinity
H	T	592	A	92.7	-0.008	Reduced affinity
H	T	592	M	92.7	0.005	Increased affinity
H	T	592	S	92.7	-0.051	Reduced affinity
H	T	594	I	32.3	0.33	Increased affinity
H	M	597	T	25.9	-0.18	Reduced affinity
H	A	603	T	0	0.344	Increased affinity
H	K	607	R	75.6	-0.071	Reduced affinity
H	G	608	R	19.2	0	Increased affinity
H	T	610	I	53.5	0.308	Increased affinity
H	T	610	S	53.5	-0.347	Reduced affinity
H	L	611	M	0	0.182	Increased affinity
H	L	611	V	0	-0.125	Reduced affinity
H	V	613	A	0	-0.038	Reduced affinity
H	F	615	L	0	-0.203	Reduced affinity
H	T	616	I	41.7	0.06	Increased affinity
H	S	618	G	77.8	-0.003	Reduced affinity
H	R	619	S	64.8	0.043	Increased affinity
H	R	619	W	64.8	0.071	Increased affinity
H	K	620	M	89.2	0.02	Increased affinity
H	K	620	N	89.2	0.013	Increased affinity
H	K	620	S	89.2	0.057	Increased affinity
H	I	621	F	68.1	0.067	Increased affinity
H	I	621	L	68.1	0.002	Increased affinity
H	I	621	M	68.1	-0.187	Reduced affinity
H	I	621	N	68.1	-0.17	Reduced affinity
H	I	621	S	68.1	-0.079	Reduced affinity
H	I	621	T	68.1	-0.076	Reduced affinity
H	I	621	V	68.1	-0.011	Reduced affinity
H	S	622	G	59.8	-0.016	Reduced affinity
H	S	622	Q	59.8	0.026	Increased affinity
H	S	622	R	59.8	-0.067	Reduced affinity
H	H	623	L	33.5	-0.121	Reduced affinity
H	H	623	P	33.5	-0.168	Reduced affinity
H	H	623	R	33.5	-0.206	Reduced affinity
H	H	623	T	33.5	-0.251	Reduced affinity
H	S	624	T	27.6	-0.015	Reduced affinity
H	T	626	M	26	0.145	Increased affinity
H	P	628	S	37.1	0.758	Increased affinity
H	H	630	R	71.3	-0.188	Reduced affinity
H	H	631	L	5.3	0.022	Increased affinity
H	H	631	Y	5.3	0.36	Increased affinity
H	D	632	N	48.5	-0.083	Reduced affinity
H	D	632	E	48.5	0.001	Increased affinity
H	P	633	S	38.4	-0.111	Reduced affinity
H	P	634	L	67.2	0.001	Increased affinity
H	V	635	A	110.1	-0.057	Reduced affinity
H	V	635	G	110.1	-0.065	Reduced affinity
H	V	635	M	110.1	-0.156	Reduced affinity
H	K	640	R	90.2	-0.087	Reduced affinity
H	H	642	Y	84.1	0.054	Increased affinity
H	S	643	A	24.9	0.109	Increased affinity
H	S	643	Y	24.9	0.128	Increased affinity
H	Q	646	H	88.7	-0.365	Reduced affinity
H	Q	646	R	88.7	-0.605	Reduced affinity
H	H	647	Q	82.5	0.267	Increased affinity
H	H	647	Y	82.5	0.645	Increased affinity
H	K	649	E	33.4	0.108	Increased affinity
H	K	649	R	33.4	-0.118	Reduced affinity
H	E	650	D	60.7	-0.057	Reduced affinity
H	L	651	M	46.6	-0.562	Reduced affinity
H	P	652	L	57.5	-0.023	Reduced affinity
H	P	652	S	57.5	-0.115	Reduced affinity
H	P	652	T	57.5	-0.061	Reduced affinity
H	T	655	S	59.7	-0.135	Reduced affinity
H	Y	656	H	72.2	-0.449	Reduced affinity
H	V	657	A	45.2	-0.166	Reduced affinity
H	V	657	T	45.2	-0.065	Reduced affinity
H	Q	658	H	96.6	0.088	Increased affinity
H	Q	658	R	96.6	-0.059	Reduced affinity
H	S	659	N	70	-0.021	Reduced affinity
H	T	660	N	26.1	-0.331	Reduced affinity
H	A	662	V	2.9	-0.16	Reduced affinity
H	T	664	I	56.9	0.27	Increased affinity
H	T	664	A	56.9	-0.018	Reduced affinity
H	E	665	D	13.8	-0.115	Reduced affinity
H	E	666	D	43.1	-0.209	Reduced affinity
H	I	667	M	2.9	0.094	Increased affinity
H	I	667	T	2.9	0.094	Increased affinity
H	I	667	V	2.9	-0.366	Reduced affinity
H	H	670	N	3.6	-0.012	Reduced affinity
H	M	671	V	4.3	-0.037	Reduced affinity
H	D	674	G	2.1	0.278	Increased affinity
H	R	678	H	7.9	0	Increased affinity
H	T	679	A	84.6	0.035	Increased affinity
H	L	680	I	7.6	0	Increased affinity
H	M	681	L	0.6	0	Increased affinity
H	M	681	T	0.6	0	Increased affinity
H	M	681	V	0.6	0	Increased affinity
H	S	682	L	61.5	0	Increased affinity
H	S	682	T	61.5	0	Increased affinity
H	Q	684	R	6.6	0	Increased affinity
H	S	685	A	0.8	0	Increased affinity
H	S	685	C	0.8	0	Increased affinity
H	S	685	Y	0.8	0	Increased affinity
H	G	686	S	0	0	Increased affinity
H	N	687	S	0	0	Increased affinity
H	K	689	T	34.3	0	Increased affinity
H	T	691	A	42.5	0	Increased affinity
H	T	691	I	42.5	0	Increased affinity
H	T	691	S	42.5	0	Increased affinity
H	G	694	C	113.4	-0.097	Reduced affinity
H	G	694	S	113.4	0.118	Increased affinity
H	G	694	N	113.4	0.216	Increased affinity
H	Q	695	R	49.7	-0.067	Reduced affinity
H	V	697	A	0	0.003	Increased affinity
H	V	697	E	0	0.001	Increased affinity
H	R	698	Q	31.4	0.019	Increased affinity
H	K	700	R	33	0	Increased affinity
H	N	702	D	27.9	0	Increased affinity
H	N	702	I	27.9	0	Increased affinity
H	N	702	S	27.9	0	Increased affinity
H	G	705	D	41.9	0	Increased affinity
H	G	705	S	41.9	0	Increased affinity
H	S	706	L	56.9	0	Increased affinity
H	N	707	D	45.8	0	Increased affinity
H	N	707	H	45.8	0	Increased affinity
H	N	707	S	45.8	0	Increased affinity
H	N	707	T	45.8	0	Increased affinity
H	E	708	D	86.6	0	Increased affinity
H	L	710	I	44.6	0.123	Increased affinity
H	L	710	Q	44.6	-0.233	Reduced affinity
H	L	710	S	44.6	-0.301	Reduced affinity
H	L	710	T	44.6	-0.263	Reduced affinity
H	L	710	V	44.6	0.063	Increased affinity
H	T	711	I	4.2	0.513	Increased affinity
H	T	713	I	71.1	0.79	Increased affinity
H	T	713	R	71.1	-0.931	Reduced affinity
H	D	714	N	36.4	0	Increased affinity
H	V	716	E	2.1	0	Increased affinity
H	V	716	M	2.1	0	Increased affinity
H	I	717	V	0.5	0	Increased affinity
H	N	718	G	0	0	Increased affinity
H	N	718	S	0	0	Increased affinity
H	N	719	S	0.4	0	Increased affinity
H	K	721	G	64.2	0	Increased affinity
H	K	721	I	64.2	0	Increased affinity
H	K	721	R	64.2	0	Increased affinity
H	V	722	I	34.3	0	Increased affinity
H	H	726	Y	6.8	0	Increased affinity
H	A	727	T	0.4	0	Increased affinity
H	A	727	V	0.4	0	Increased affinity
H	A	728	E	4.2	0.001	Increased affinity
H	A	728	T	4.2	0.003	Increased affinity
H	V	729	I	11.1	0.223	Increased affinity
H	N	731	D	0.3	0	Increased affinity
H	K	733	E	0	0.097	Increased affinity
H	K	733	R	0	-0.105	Reduced affinity
H	K	734	N	0	-0.03	Reduced affinity
H	K	734	R	0	-0.027	Reduced affinity
H	Y	737	C	12.6	0.248	Increased affinity
H	Y	737	D	12.6	-0.089	Reduced affinity
H	Y	737	F	12.6	-0.579	Reduced affinity
H	N	738	S	7.9	-0.636	Reduced affinity
H	P	740	L	21.6	1.562	Increased affinity
H	L	741	S	77.7	1.488	Increased affinity
H	V	742	G	27.7	1.356	Increased affinity
H	N	745	S	0.7	0.339	Increased affinity
H	A	746	D	38.1	0.022	Increased affinity
H	A	746	V	38.1	0.488	Increased affinity
H	E	747	A	64.3	0.398	Increased affinity
H	L	748	A	12.3	1.439	Increased affinity
H	L	748	F	12.3	1.652	Increased affinity
H	L	748	I	12.3	1.384	Increased affinity
H	L	748	P	12.3	1.406	Increased affinity
H	L	748	S	12.3	1.854	Increased affinity
H	K	752	H	31.9	-0.369	Reduced affinity
H	K	752	Q	31.9	-0.327	Reduced affinity
H	I	755	L	0	-0.036	Reduced affinity
H	I	755	V	0	-0.037	Reduced affinity
H	H	756	Y	16.7	-0.021	Reduced affinity
H	I	757	T	23.6	0.262	Increased affinity
H	I	757	V	23.6	-0.183	Reduced affinity
H	P	760	L	19	0.141	Increased affinity
H	P	760	S	19	0.025	Increased affinity
H	A	762	V	46.7	0.124	Increased affinity
H	V	764	A	43.6	-0.206	Reduced affinity
H	T	765	I	46.4	0.125	Increased affinity
H	R	767	M	40.4	-0.002	Reduced affinity
H	R	767	V	40.4	0.107	Increased affinity
H	V	768	G	32	-0.132	Reduced affinity
H	K	770	R	39.7	-0.279	Reduced affinity
H	A	771	V	16.9	0.003	Increased affinity
H	R	772	G	76.1	0	Increased affinity
H	N	773	I	90.6	0.003	Increased affinity
H	T	775	P	77.7	0	Increased affinity
H	T	777	A	74.7	0.07	Increased affinity
H	T	777	M	74.7	-1.025	Reduced affinity
H	T	777	S	74.7	0.349	Increased affinity
H	G	779	E	44.3	0.845	Increased affinity
H	G	779	R	44.3	-0.352	Reduced affinity
H	K	780	R	82.2	-0.559	Reduced affinity
H	N	781	K	67.8	-0.248	Reduced affinity
H	Q	782	K	41.9	-0.385	Reduced affinity
H	I	784	T	27.1	0.347	Increased affinity
H	I	784	V	27.1	0.425	Increased affinity
H	M	785	L	0.5	0	Increased affinity
H	L	786	S	50.9	0	Increased affinity
H	L	786	V	50.9	0	Increased affinity
H	Y	788	C	56.4	0	Increased affinity
H	Y	788	H	56.4	0	Increased affinity
H	L	794	F	34.4	0.447	Increased affinity
H	Y	797	C	23	-0.429	Reduced affinity
H	Y	797	F	23	0.111	Increased affinity
H	N	799	K	30.1	-0.119	Reduced affinity
H	N	799	S	30.1	-0.064	Reduced affinity
H	E	802	Q	89.4	-0.211	Reduced affinity
H	E	803	K	91.6	-0.538	Reduced affinity
H	P	804	S	19.7	-0.01	Reduced affinity
H	P	804	T	19.7	-0.017	Reduced affinity
H	N	805	H	85.6	-1.039	Reduced affinity
H	Y	806	S	14.4	0.065	Increased affinity
H	Q	807	H	55.4	-0.812	Reduced affinity
H	Q	807	L	55.4	-0.13	Reduced affinity
H	Q	807	R	55.4	-0.742	Reduced affinity
H	Q	807	S	55.4	-0.091	Reduced affinity
H	E	808	H	48.6	-0.792	Reduced affinity
H	E	808	K	48.6	-0.03	Reduced affinity
H	E	808	Q	48.6	0.633	Increased affinity
H	E	809	Q	41.6	-0.339	Reduced affinity
H	M	812	A	55.4	0	Increased affinity
H	M	812	T	55.4	0	Increased affinity
H	H	813	L	97.4	0	Increased affinity
H	H	813	P	97.4	0	Increased affinity
H	H	813	R	97.4	0	Increased affinity
H	H	813	Y	97.4	0	Increased affinity
H	K	814	R	73.8	0	Increased affinity
H	E	816	G	65.7	0	Increased affinity
H	E	816	K	65.7	0	Increased affinity
H	V	817	I	14.1	0.003	Increased affinity
H	V	818	A	47.5	-0.126	Reduced affinity
H	V	818	M	47.5	-0.415	Reduced affinity
H	V	818	R	47.5	-0.224	Reduced affinity
H	V	818	T	47.5	-0.095	Reduced affinity
H	L	819	I	9.2	-0.363	Reduced affinity
H	L	819	V	9.2	-0.452	Reduced affinity
H	T	820	A	84.4	-0.165	Reduced affinity
H	T	820	I	84.4	0.103	Increased affinity
H	V	821	G	0	-0.336	Reduced affinity
H	V	828	A	0	-0.188	Reduced affinity
H	V	828	I	0	0.179	Increased affinity
H	W	830	C	0.9	0.001	Increased affinity
H	G	831	D	26.6	0.867	Increased affinity
H	N	833	K	12.4	0.259	Increased affinity
H	E	834	G	82.1	-0.567	Reduced affinity
H	E	834	V	82.1	-0.42	Reduced affinity
H	P	835	L	22.4	-0.002	Reduced affinity
H	K	837	E	33.7	1.689	Increased affinity
H	K	837	R	33.7	-0.126	Reduced affinity
H	Q	841	H	14.8	-0.988	Reduced affinity
H	L	842	M	74.3	-2.232	Reduced affinity

## Sheet: 7CVZ Predictions
Supplementary File 4: Table S2: Affinity prediction of Fab-263 (PDB ID: 7CVZ) E2-associated polymorphisms
Chain	Wild Residue	Residue Position	Mutant Residue	RSA (%)	Predicted ΔΔG	Outcome
B	N	5	H	106.8	0.022	Increased affinity
B	N	5	R	106.8	-0.011	Reduced affinity
B	F	6	L	49.1	-0.038	Reduced affinity
B	F	6	S	49.1	-0.04	Reduced affinity
B	F	6	Y	49.1	-0.038	Reduced affinity
B	N	7	D	77.2	-0.034	Reduced affinity
B	N	7	T	77.2	-0.027	Reduced affinity
B	V	8	A	58.2	-0.04	Reduced affinity
B	A	11	V	83.4	-0.046	Reduced affinity
B	T	12	I	47.8	-0.001	Reduced affinity
B	R	13	K	36.2	-0.052	Reduced affinity
B	P	14	Q	45.3	-0.071	Reduced affinity
B	H	18	P	39.1	-0.042	Reduced affinity
B	H	18	Q	39.1	-0.057	Reduced affinity
B	H	18	R	39.1	-0.058	Reduced affinity
B	C	19	G	38.8	0.01	Increased affinity
B	C	19	R	38.8	-0.014	Reduced affinity
B	D	21	V	42.4	-0.006	Reduced affinity
B	G	23	A	232	-0.046	Reduced affinity
B	G	23	E	232	-0.052	Reduced affinity
B	H	26	Y	52.8	-0.047	Reduced affinity
B	S	27	P	70.3	-0.002	Reduced affinity
B	V	32	I	48.7	-0.045	Reduced affinity
B	A	33	V	44.9	-0.046	Reduced affinity
B	L	34	I	43	-0.044	Reduced affinity
B	R	36	H	40.7	0.004	Increased affinity
B	I	37	L	46.2	-0.044	Reduced affinity
B	I	37	V	46.2	-0.042	Reduced affinity
B	N	39	S	63.7	-0.026	Reduced affinity
B	T	42	I	63.5	-0.001	Reduced affinity
B	T	45	R	51.3	-0.023	Reduced affinity
B	L	46	Q	36.3	-0.069	Reduced affinity
B	K	47	H	31.4	0.016	Increased affinity
B	K	47	N	31.4	-0.052	Reduced affinity
B	I	48	L	36.9	-0.043	Reduced affinity
B	V	50	I	38.9	-0.045	Reduced affinity
B	L	52	F	33.6	-0.04	Reduced affinity
B	I	54	L	31.1	-0.043	Reduced affinity
B	G	55	R	145.9	-0.046	Reduced affinity
B	I	56	L	30.5	-0.043	Reduced affinity
B	I	56	T	30.5	-0.053	Reduced affinity
B	K	57	G	30.5	0	Increased affinity
B	K	57	Q	30.5	-0.06	Reduced affinity
B	K	57	R	30.5	-0.027	Reduced affinity
B	D	60	G	64.5	-0.004	Reduced affinity
B	S	61	G	85.3	0.001	Increased affinity
B	S	61	N	85.3	-0.054	Reduced affinity
B	H	62	Y	48.3	-0.048	Reduced affinity
B	D	63	G	65.3	-0.004	Reduced affinity
B	W	64	R	35.5	-0.027	Reduced affinity
B	K	66	E	28.7	-0.046	Reduced affinity
B	Y	69	H	28.6	-0.02	Reduced affinity
B	Y	69	I	28.6	-0.042	Reduced affinity
B	N	72	S	83.9	-0.026	Reduced affinity
B	N	72	T	83.9	-0.028	Reduced affinity
B	H	73	Y	58.2	-0.047	Reduced affinity
B	M	74	L	41.7	-0.03	Reduced affinity
B	M	74	I	41.7	-0.03	Reduced affinity
B	M	74	T	41.7	-0.039	Reduced affinity
B	M	74	V	41.7	-0.029	Reduced affinity
B	A	76	T	86.6	-0.059	Reduced affinity
B	E	79	G	42.9	-0.003	Reduced affinity
B	A	81	V	108.2	-0.046	Reduced affinity
B	G	82	R	174.1	-0.045	Reduced affinity
B	L	83	I	34	-0.043	Reduced affinity
B	F	84	L	44.1	-0.038	Reduced affinity
B	F	84	I	44.1	-0.038	Reduced affinity
B	F	84	S	44.1	-0.041	Reduced affinity
B	V	85	A	42.3	-0.041	Reduced affinity
B	R	86	K	22.3	-0.052	Reduced affinity
B	T	87	S	38.2	-0.043	Reduced affinity
B	S	88	L	96.6	-0.003	Reduced affinity
B	A	89	S	94.1	-0.059	Reduced affinity
B	P	90	L	60	-0.045	Reduced affinity
B	P	90	S	60	-0.054	Reduced affinity
B	T	92	A	78.8	0.002	Increased affinity
B	T	92	M	78.8	-0.004	Reduced affinity
B	T	92	S	78.8	-0.043	Reduced affinity
B	T	94	I	76.2	-0.002	Reduced affinity
B	I	97	T	42.2	-0.054	Reduced affinity
B	I	97	M	42.2	-0.038	Reduced affinity
B	A	103	T	59.4	-0.06	Reduced affinity
B	K	107	R	46.1	-0.028	Reduced affinity
B	G	108	R	133.8	-0.047	Reduced affinity
B	T	110	I	48.6	-0.001	Reduced affinity
B	T	110	S	48.6	-0.043	Reduced affinity
B	L	111	M	32.6	-0.038	Reduced affinity
B	L	111	V	32.6	-0.043	Reduced affinity
B	V	113	A	41.7	-0.04	Reduced affinity
B	F	115	L	24.6	-0.038	Reduced affinity
B	T	116	I	80.3	-0.002	Reduced affinity
B	S	118	G	105.4	0.001	Increased affinity
B	R	119	S	40.1	-0.044	Reduced affinity
B	R	119	W	40.1	-0.012	Reduced affinity
B	K	120	M	39.5	-0.007	Reduced affinity
B	K	120	N	39.5	-0.052	Reduced affinity
B	K	120	S	39.5	-0.042	Reduced affinity
B	I	121	F	50.1	-0.04	Reduced affinity
B	I	121	L	50.1	-0.044	Reduced affinity
B	I	121	M	50.1	-0.037	Reduced affinity
B	I	121	N	50.1	-0.058	Reduced affinity
B	I	121	S	50.1	-0.05	Reduced affinity
B	I	121	T	50.1	-0.052	Reduced affinity
B	I	121	V	50.1	-0.042	Reduced affinity
B	S	122	G	76.8	0.002	Increased affinity
B	S	122	Q	76.8	-0.061	Reduced affinity
B	S	122	R	76.8	-0.023	Reduced affinity
B	H	123	L	47	-0.044	Reduced affinity
B	H	123	P	47	-0.043	Reduced affinity
B	H	123	R	47	-0.056	Reduced affinity
B	H	123	T	47	-0.047	Reduced affinity
B	S	124	T	59.4	-0.045	Reduced affinity
B	T	126	M	65.4	-0.003	Reduced affinity
B	P	128	S	43.4	-0.054	Reduced affinity
B	H	130	R	47.8	-0.055	Reduced affinity
B	H	131	L	48.1	-0.044	Reduced affinity
B	H	131	Y	48.1	-0.047	Reduced affinity
B	D	132	N	82.5	-0.061	Reduced affinity
B	D	132	E	82.5	-0.045	Reduced affinity
B	P	133	S	51.7	-0.053	Reduced affinity
B	P	134	L	64	-0.045	Reduced affinity
B	V	135	A	55.5	-0.041	Reduced affinity
B	V	135	G	55.5	-0.039	Reduced affinity
B	V	135	M	55.5	-0.039	Reduced affinity
B	K	140	R	39.5	-0.027	Reduced affinity
B	H	142	Y	56.2	-0.047	Reduced affinity
B	S	143	A	101.5	0.002	Increased affinity
B	S	143	Y	101.5	0.002	Increased affinity
B	Q	146	H	56.1	0.024	Increased affinity
B	Q	146	R	56.1	-0.012	Reduced affinity
B	H	147	Q	44.6	-0.056	Reduced affinity
B	H	147	Y	44.6	-0.046	Reduced affinity
B	K	149	E	45	-0.046	Reduced affinity
B	K	149	R	45	-0.028	Reduced affinity
B	E	150	D	45.7	-0.043	Reduced affinity
B	L	151	M	45.4	-0.038	Reduced affinity
B	P	152	L	52.2	-0.045	Reduced affinity
B	P	152	S	52.2	-0.053	Reduced affinity
B	P	152	T	52.2	-0.055	Reduced affinity
B	T	155	S	51	-0.043	Reduced affinity
B	Y	156	H	28.3	-0.022	Reduced affinity
B	V	157	A	62.2	-0.041	Reduced affinity
B	V	157	T	62.2	-0.056	Reduced affinity
B	Q	158	H	48.4	0.025	Increased affinity
B	Q	158	R	48.4	-0.008	Reduced affinity
B	S	159	N	100.4	-0.054	Reduced affinity
B	T	160	N	82	-0.053	Reduced affinity
B	A	162	V	103.1	-0.046	Reduced affinity
B	T	164	I	80.7	-0.003	Reduced affinity
B	T	164	A	80.7	0.001	Increased affinity
B	E	165	D	59.1	-0.042	Reduced affinity
B	E	166	D	43.7	-0.042	Reduced affinity
B	I	167	M	50.5	-0.038	Reduced affinity
B	I	167	T	50.5	-0.054	Reduced affinity
B	I	167	V	50.5	-0.043	Reduced affinity
B	H	170	N	30.7	-0.054	Reduced affinity
B	M	171	V	40.4	-0.029	Reduced affinity
B	D	174	G	81.3	-0.005	Reduced affinity
B	H	178	R	49.1	-0.056	Reduced affinity
B	T	179	A	75.5	0.001	Increased affinity
B	L	180	I	41.2	-0.044	Reduced affinity
B	M	181	L	31.8	-0.03	Reduced affinity
B	M	181	T	31.8	-0.04	Reduced affinity
B	M	181	V	31.8	-0.029	Reduced affinity
B	S	182	L	86.6	-0.004	Reduced affinity
B	S	182	T	86.6	-0.045	Reduced affinity
B	Q	184	R	47.8	-0.008	Reduced affinity
B	S	185	A	111.2	-0.001	Reduced affinity
B	S	185	C	111.2	-0.042	Reduced affinity
B	S	185	Y	111.2	-0.001	Reduced affinity
B	G	186	S	165.4	-0.058	Reduced affinity
B	N	187	S	34.5	-0.026	Reduced affinity
B	K	189	T	34.3	-0.043	Reduced affinity
B	T	191	A	64.4	0.002	Increased affinity
B	T	191	I	64.4	-0.002	Reduced affinity
B	T	191	S	64.4	-0.042	Reduced affinity
B	G	194	C	219.2	-0.053	Reduced affinity
B	G	194	S	219.2	-0.058	Reduced affinity
B	G	194	N	219.2	-0.065	Reduced affinity
B	Q	195	R	54	-0.008	Reduced affinity
B	V	197	A	34.1	-0.041	Reduced affinity
B	V	197	E	34.1	-0.05	Reduced affinity
B	R	198	Q	23.5	-0.059	Reduced affinity
B	K	200	R	28.2	-0.027	Reduced affinity
B	N	202	D	60.2	-0.034	Reduced affinity
B	N	202	I	60.2	0.011	Increased affinity
B	N	202	S	60.2	-0.026	Reduced affinity
B	G	205	D	193.6	-0.052	Reduced affinity
B	G	205	S	193.6	-0.058	Reduced affinity
B	S	206	L	105.9	-0.005	Reduced affinity
B	N	207	D	65.8	-0.034	Reduced affinity
B	N	207	H	65.8	0.022	Increased affinity
B	N	207	S	65.8	-0.026	Reduced affinity
B	N	207	T	65.8	-0.027	Reduced affinity
B	E	208	D	55	-0.042	Reduced affinity
B	L	210	I	33.6	-0.043	Reduced affinity
B	L	210	Q	33.6	-0.067	Reduced affinity
B	L	210	S	33.6	-0.05	Reduced affinity
B	L	210	T	33.6	-0.053	Reduced affinity
B	L	210	V	33.6	-0.042	Reduced affinity
B	T	211	I	69.9	-0.003	Reduced affinity
B	T	213	I	70.9	-0.003	Reduced affinity
B	T	213	R	70.9	-0.022	Reduced affinity
B	D	214	N	61.9	-0.061	Reduced affinity
B	V	216	E	50.5	-0.05	Reduced affinity
B	V	216	M	50.5	-0.039	Reduced affinity
B	I	217	V	41.2	-0.042	Reduced affinity
B	N	218	G	66	0.016	Increased affinity
B	N	218	S	66	-0.026	Reduced affinity
B	N	219	S	74	-0.026	Reduced affinity
B	K	221	G	40.9	-0.001	Reduced affinity
B	K	221	I	40.9	-0.006	Reduced affinity
B	K	221	R	40.9	-0.027	Reduced affinity
B	V	222	I	49	-0.045	Reduced affinity
B	H	226	Y	47.2	-0.047	Reduced affinity
B	A	227	T	75.9	-0.062	Reduced affinity
B	A	227	V	75.9	-0.046	Reduced affinity
B	A	228	E	51.7	-0.051	Reduced affinity
B	A	228	T	51.7	-0.062	Reduced affinity
B	V	229	I	55.5	-0.046	Reduced affinity
B	N	231	D	80.7	-0.033	Reduced affinity
B	K	233	E	49.5	-0.047	Reduced affinity
B	K	233	R	49.5	-0.026	Reduced affinity
B	K	234	N	35.5	-0.052	Reduced affinity
B	K	234	R	35.5	-0.027	Reduced affinity
B	Y	237	C	31.7	-0.044	Reduced affinity
B	Y	237	D	31.7	-0.044	Reduced affinity
B	Y	237	F	31.7	-0.048	Reduced affinity
B	N	238	S	68.1	-0.028	Reduced affinity
B	P	240	L	45.9	-0.047	Reduced affinity
B	L	241	S	30.5	-0.056	Reduced affinity
B	V	242	G	56	-0.042	Reduced affinity
B	N	245	S	59.3	-0.028	Reduced affinity
B	A	246	D	63.5	-0.051	Reduced affinity
B	A	246	V	63.5	-0.047	Reduced affinity
B	E	247	A	46.8	-0.005	Reduced affinity
B	L	248	A	51.7	-0.04	Reduced affinity
B	L	248	F	51.7	-0.041	Reduced affinity
B	L	248	I	51.7	-0.045	Reduced affinity
B	L	248	P	51.7	-0.044	Reduced affinity
B	L	248	S	51.7	-0.053	Reduced affinity
B	K	252	H	45.1	0.013	Increased affinity
B	K	252	Q	45.1	-0.06	Reduced affinity
B	I	255	L	48.4	-0.043	Reduced affinity
B	I	255	V	48.4	-0.042	Reduced affinity
B	H	256	Y	37.3	-0.048	Reduced affinity
B	I	257	T	48.8	-0.053	Reduced affinity
B	I	257	V	48.8	-0.042	Reduced affinity
B	P	260	L	59.5	-0.045	Reduced affinity
B	P	260	S	59.5	-0.054	Reduced affinity
B	A	262	V	97.6	-0.046	Reduced affinity
B	V	264	A	57.4	-0.041	Reduced affinity
B	T	265	I	62	-0.003	Reduced affinity
B	R	267	M	24.9	-0.012	Reduced affinity
B	R	267	V	24.9	-0.013	Reduced affinity
B	V	268	G	54.8	-0.04	Reduced affinity
B	K	270	R	39.9	-0.028	Reduced affinity
B	A	271	V	94.6	-0.046	Reduced affinity
B	R	272	G	40.6	-0.01	Reduced affinity
B	N	273	I	82.9	0.011	Increased affinity
B	T	275	P	80.1	-0.001	Reduced affinity
B	T	277	A	65.9	0.001	Increased affinity
B	T	277	M	65.9	-0.005	Reduced affinity
B	T	277	S	65.9	-0.043	Reduced affinity
B	G	279	E	187.6	-0.052	Reduced affinity
B	G	279	R	187.6	-0.047	Reduced affinity
B	K	280	R	41	-0.029	Reduced affinity
B	N	281	K	83.9	-0.024	Reduced affinity
B	Q	282	K	30.8	-0.021	Reduced affinity
B	I	284	T	35.1	-0.053	Reduced affinity
B	I	284	V	35.1	-0.043	Reduced affinity
B	M	285	L	34.8	-0.03	Reduced affinity
B	L	286	S	33.2	-0.051	Reduced affinity
B	L	286	V	33.2	-0.042	Reduced affinity
B	Y	288	C	45.6	-0.043	Reduced affinity
B	Y	288	H	45.6	-0.022	Reduced affinity
B	L	294	F	33.9	-0.04	Reduced affinity
B	Y	297	C	26.5	-0.044	Reduced affinity
B	Y	297	F	26.5	-0.048	Reduced affinity
B	N	299	K	47.2	-0.025	Reduced affinity
B	N	299	S	47.2	-0.027	Reduced affinity
B	E	302	Q	52.4	-0.067	Reduced affinity
B	E	303	K	59.2	-0.038	Reduced affinity
B	P	304	S	66.7	-0.055	Reduced affinity
B	P	304	T	66.7	-0.057	Reduced affinity
B	N	305	H	78.9	0.022	Increased affinity
B	Y	306	S	32.3	-0.046	Reduced affinity
B	Q	307	H	55.4	0.024	Increased affinity
B	Q	307	L	55.4	0.016	Increased affinity
B	Q	307	R	55.4	-0.01	Reduced affinity
B	Q	307	S	55.4	-0.022	Reduced affinity
B	E	308	H	44.8	0.007	Increased affinity
B	E	308	K	44.8	-0.038	Reduced affinity
B	E	308	Q	44.8	-0.067	Reduced affinity
B	E	309	Q	58.2	-0.067	Reduced affinity
B	M	312	A	35.8	-0.027	Reduced affinity
B	M	312	T	35.8	-0.039	Reduced affinity
B	H	313	L	53.3	-0.043	Reduced affinity
B	H	313	P	53.3	-0.043	Reduced affinity
B	H	313	R	53.3	-0.055	Reduced affinity
B	H	313	Y	53.3	-0.047	Reduced affinity
B	K	314	R	39.3	-0.027	Reduced affinity
B	E	316	G	46.8	-0.004	Reduced affinity
B	E	316	K	46.8	-0.037	Reduced affinity
B	V	317	I	59.7	-0.045	Reduced affinity
B	V	318	A	50.8	-0.04	Reduced affinity
B	V	318	M	50.8	-0.038	Reduced affinity
B	V	318	R	50.8	-0.041	Reduced affinity
B	V	318	T	50.8	-0.055	Reduced affinity
B	L	319	I	47.1	-0.044	Reduced affinity
B	L	319	V	47.1	-0.043	Reduced affinity
B	T	320	A	62.1	0.002	Increased affinity
B	T	320	I	62.1	-0.002	Reduced affinity
B	V	321	G	49.4	-0.04	Reduced affinity
B	V	328	A	42.5	-0.042	Reduced affinity
B	V	328	I	42.5	-0.046	Reduced affinity
B	W	330	C	29.6	-0.033	Reduced affinity
B	G	331	D	149.9	-0.052	Reduced affinity
B	N	333	K	70.4	-0.023	Reduced affinity
B	E	334	G	66	-0.004	Reduced affinity
B	E	334	V	66	-0.006	Reduced affinity
B	P	335	L	45.9	-0.045	Reduced affinity
B	K	337	E	33.9	-0.045	Reduced affinity
B	K	337	R	33.9	-0.029	Reduced affinity
B	Q	341	H	55.8	0.024	Increased affinity
B	L	342	M	54.8	-0.04	Reduced affinity
B	S	343	P	79.6	-0.001	Reduced affinity
B	T	344	A	45	0.001	Increased affinity
B	G	346	S	235.9	-0.059	Reduced affinity
B	G	350	S	197.8	-0.061	Reduced affinity
B	H	351	E	54.4	-0.046	Reduced affinity
B	H	351	N	54.4	-0.053	Reduced affinity
B	H	351	Q	54.4	-0.057	Reduced affinity
B	H	351	R	54.4	-0.056	Reduced affinity
B	H	351	Y	54.4	-0.047	Reduced affinity
B	P	352	V	62.6	-0.044	Reduced affinity
B	H	353	A	56.9	-0.041	Reduced affinity
B	H	353	E	56.9	-0.046	Reduced affinity
B	H	353	Q	56.9	-0.056	Reduced affinity
B	H	353	R	56.9	-0.054	Reduced affinity
B	H	353	Y	56.9	-0.047	Reduced affinity
B	E	354	D	65.6	-0.042	Reduced affinity
B	I	356	F	47.7	-0.041	Reduced affinity
B	I	356	Y	47.7	-0.037	Reduced affinity
B	L	357	E	39.9	-0.049	Reduced affinity
B	L	357	Q	39.9	-0.068	Reduced affinity
B	L	357	R	39.9	-0.042	Reduced affinity
B	Y	358	S	30.9	-0.047	Reduced affinity
B	E	361	G	57.5	-0.004	Reduced affinity
B	M	366	I	34.1	-0.03	Reduced affinity
B	M	366	K	34.1	-0.04	Reduced affinity
B	M	366	T	34.1	-0.039	Reduced affinity
B	M	366	V	34.1	-0.029	Reduced affinity
B	V	368	A	54.8	-0.041	Reduced affinity
B	V	369	I	41.1	-0.045	Reduced affinity
B	V	370	I	48.9	-0.045	Reduced affinity
B	V	370	A	48.9	-0.041	Reduced affinity
B	V	371	L	49.6	-0.045	Reduced affinity
B	V	371	M	49.6	-0.039	Reduced affinity
B	S	372	A	74.2	-0.001	Reduced affinity
B	V	373	A	49	-0.041	Reduced affinity
B	A	374	V	81	-0.046	Reduced affinity
B	T	375	L	56.4	-0.003	Reduced affinity
B	T	375	S	56.4	-0.042	Reduced affinity
B	F	376	C	34.9	-0.039	Reduced affinity
B	I	377	T	39.6	-0.052	Reduced affinity
B	I	377	V	39.6	-0.042	Reduced affinity
B	S	380	A	73.9	-0.001	Reduced affinity
B	S	380	T	73.9	-0.045	Reduced affinity
B	V	382	M	48.1	-0.039	Reduced affinity
B	M	384	A	35	-0.027	Reduced affinity
B	M	384	T	35	-0.04	Reduced affinity
B	M	384	V	35	-0.029	Reduced affinity
B	A	385	T	66.2	-0.06	Reduced affinity
B	A	386	V	77.4	-0.046	Reduced affinity
B	G	387	W	165.2	-0.032	Reduced affinity
B	C	389	Y	54.7	0.006	Increased affinity
B	M	390	I	34.2	-0.03	Reduced affinity
B	M	390	V	34.2	-0.029	Reduced affinity
B	C	391	Y	55.9	0.006	Increased affinity
B	R	395	G	31.8	-0.01	Reduced affinity
B	R	395	I	31.8	-0.013	Reduced affinity
B	R	395	N	31.8	-0.056	Reduced affinity
B	I	397	L	37	-0.045	Reduced affinity
B	P	404	T	66.5	-0.057	Reduced affinity
B	G	405	R	192	-0.047	Reduced affinity
B	G	405	S	192	-0.06	Reduced affinity
B	G	405	T	192	-0.061	Reduced affinity
B	A	406	T	84.3	-0.06	Reduced affinity
B	A	406	Y	84.3	-0.038	Reduced affinity
B	T	407	A	75.2	0.001	Increased affinity
B	V	408	I	51.7	-0.045	Reduced affinity
B	P	409	A	58.5	-0.041	Reduced affinity
B	P	409	L	58.5	-0.045	Reduced affinity
B	P	409	S	58.5	-0.053	Reduced affinity
B	L	412	V	35.9	-0.043	Reduced affinity
B	S	413	G	81.3	0	Increased affinity
B	S	413	N	81.3	-0.054	Reduced affinity
B	I	415	L	54.3	-0.044	Reduced affinity
B	I	415	M	54.3	-0.038	Reduced affinity
B	I	415	T	54.3	-0.053	Reduced affinity
B	I	415	V	54.3	-0.043	Reduced affinity
B	C	416	G	53.2	0.009	Increased affinity
E	N	5	H	106.8	0.022	Increased affinity
E	N	5	R	106.8	-0.011	Reduced affinity
E	F	6	L	49.1	-0.038	Reduced affinity
E	F	6	S	49.1	-0.04	Reduced affinity
E	F	6	Y	49.1	-0.038	Reduced affinity
E	N	7	D	77.2	-0.034	Reduced affinity
E	N	7	T	77.2	-0.027	Reduced affinity
E	V	8	A	58.2	-0.04	Reduced affinity
E	A	11	V	83.4	-0.046	Reduced affinity
E	T	12	I	47.8	-0.001	Reduced affinity
E	R	13	K	36.2	-0.052	Reduced affinity
E	P	14	Q	45.3	-0.071	Reduced affinity
E	H	18	P	39.1	-0.042	Reduced affinity
E	H	18	Q	39.1	-0.057	Reduced affinity
E	H	18	R	39.1	-0.058	Reduced affinity
E	C	19	G	38.8	0.01	Increased affinity
E	C	19	R	38.8	-0.014	Reduced affinity
E	D	21	V	42.4	-0.007	Reduced affinity
E	G	23	A	232	-0.046	Reduced affinity
E	G	23	E	232	-0.052	Reduced affinity
E	H	26	Y	52.8	-0.047	Reduced affinity
E	S	27	P	70.3	-0.001	Reduced affinity
E	V	32	I	48.7	-0.045	Reduced affinity
E	A	33	V	44.9	-0.046	Reduced affinity
E	L	34	I	43	-0.044	Reduced affinity
E	R	36	H	40.7	0.004	Increased affinity
E	I	37	L	46.2	-0.044	Reduced affinity
E	I	37	V	46.2	-0.042	Reduced affinity
E	N	39	S	63.7	-0.026	Reduced affinity
E	T	42	I	63.5	-0.001	Reduced affinity
E	T	45	R	51.3	-0.023	Reduced affinity
E	L	46	Q	36.3	-0.069	Reduced affinity
E	K	47	H	31.4	0.016	Increased affinity
E	K	47	N	31.4	-0.052	Reduced affinity
E	I	48	L	36.9	-0.043	Reduced affinity
E	V	50	I	38.9	-0.045	Reduced affinity
E	L	52	F	33.6	-0.04	Reduced affinity
E	I	54	L	31.1	-0.043	Reduced affinity
E	G	55	R	145.9	-0.046	Reduced affinity
E	I	56	L	30.5	-0.043	Reduced affinity
E	I	56	T	30.5	-0.053	Reduced affinity
E	K	57	G	30.5	0	Increased affinity
E	K	57	Q	30.5	-0.06	Reduced affinity
E	K	57	R	30.5	-0.027	Reduced affinity
E	D	60	G	64.5	-0.004	Reduced affinity
E	S	61	G	85.3	0.001	Increased affinity
E	S	61	N	85.3	-0.054	Reduced affinity
E	H	62	Y	48.3	-0.048	Reduced affinity
E	D	63	G	65.3	-0.004	Reduced affinity
E	W	64	R	35.5	-0.027	Reduced affinity
E	K	66	E	28.7	-0.046	Reduced affinity
E	Y	69	H	28.6	-0.02	Reduced affinity
E	Y	69	I	28.6	-0.042	Reduced affinity
E	N	72	S	83.9	-0.026	Reduced affinity
E	N	72	T	83.9	-0.027	Reduced affinity
E	H	73	Y	58.2	-0.047	Reduced affinity
E	M	74	L	41.7	-0.03	Reduced affinity
E	M	74	I	41.7	-0.03	Reduced affinity
E	M	74	T	41.7	-0.039	Reduced affinity
E	M	74	V	41.7	-0.029	Reduced affinity
E	A	76	T	86.6	-0.059	Reduced affinity
E	E	79	G	42.9	-0.003	Reduced affinity
E	A	81	V	108.2	-0.046	Reduced affinity
E	G	82	R	174.1	-0.045	Reduced affinity
E	L	83	I	34	-0.043	Reduced affinity
E	F	84	L	44.1	-0.038	Reduced affinity
E	F	84	I	44.1	-0.038	Reduced affinity
E	F	84	S	44.1	-0.041	Reduced affinity
E	V	85	A	42.3	-0.041	Reduced affinity
E	R	86	K	22.3	-0.052	Reduced affinity
E	T	87	S	38.2	-0.043	Reduced affinity
E	S	88	L	96.6	-0.003	Reduced affinity
E	A	89	S	94.1	-0.059	Reduced affinity
E	P	90	L	60	-0.045	Reduced affinity
E	P	90	S	60	-0.054	Reduced affinity
E	T	92	A	78.8	0.002	Increased affinity
E	T	92	M	78.8	-0.004	Reduced affinity
E	T	92	S	78.8	-0.043	Reduced affinity
E	T	94	I	76.2	-0.002	Reduced affinity
E	I	97	T	42.2	-0.054	Reduced affinity
E	I	97	M	42.2	-0.038	Reduced affinity
E	A	103	T	59.4	-0.061	Reduced affinity
E	K	107	R	46.1	-0.028	Reduced affinity
E	G	108	R	133.8	-0.047	Reduced affinity
E	T	110	I	48.6	-0.001	Reduced affinity
E	T	110	S	48.6	-0.043	Reduced affinity
E	L	111	M	32.6	-0.038	Reduced affinity
E	L	111	V	32.6	-0.043	Reduced affinity
E	V	113	A	41.7	-0.041	Reduced affinity
E	F	115	L	24.6	-0.038	Reduced affinity
E	T	116	I	80.3	-0.002	Reduced affinity
E	S	118	G	105.4	0.001	Increased affinity
E	R	119	S	40.1	-0.044	Reduced affinity
E	R	119	W	40.1	-0.012	Reduced affinity
E	K	120	M	39.5	-0.007	Reduced affinity
E	K	120	N	39.5	-0.052	Reduced affinity
E	K	120	S	39.5	-0.042	Reduced affinity
E	I	121	F	50.1	-0.04	Reduced affinity
E	I	121	L	50.1	-0.044	Reduced affinity
E	I	121	M	50.1	-0.037	Reduced affinity
E	I	121	N	50.1	-0.058	Reduced affinity
E	I	121	S	50.1	-0.05	Reduced affinity
E	I	121	T	50.1	-0.052	Reduced affinity
E	I	121	V	50.1	-0.042	Reduced affinity
E	S	122	G	76.8	0.002	Increased affinity
E	S	122	Q	76.8	-0.061	Reduced affinity
E	S	122	R	76.8	-0.023	Reduced affinity
E	H	123	L	47	-0.044	Reduced affinity
E	H	123	P	47	-0.043	Reduced affinity
E	H	123	R	47	-0.056	Reduced affinity
E	H	123	T	47	-0.047	Reduced affinity
E	S	124	T	59.4	-0.045	Reduced affinity
E	T	126	M	65.4	-0.003	Reduced affinity
E	P	128	S	43.4	-0.055	Reduced affinity
E	H	130	R	47.8	-0.056	Reduced affinity
E	H	131	L	48.1	-0.043	Reduced affinity
E	H	131	Y	48.1	-0.047	Reduced affinity
E	D	132	N	82.5	-0.062	Reduced affinity
E	D	132	E	82.5	-0.045	Reduced affinity
E	P	133	S	51.7	-0.053	Reduced affinity
E	P	134	L	64	-0.045	Reduced affinity
E	V	135	A	55.5	-0.041	Reduced affinity
E	V	135	G	55.5	-0.039	Reduced affinity
E	V	135	M	55.5	-0.039	Reduced affinity
E	K	140	R	39.5	-0.027	Reduced affinity
E	H	142	Y	56.2	-0.047	Reduced affinity
E	S	143	A	101.5	0.001	Increased affinity
E	S	143	Y	101.5	0.001	Increased affinity
E	Q	146	H	56.1	0.024	Increased affinity
E	Q	146	R	56.1	-0.012	Reduced affinity
E	H	147	Q	44.6	-0.057	Reduced affinity
E	H	147	Y	44.6	-0.047	Reduced affinity
E	K	149	E	45	-0.047	Reduced affinity
E	K	149	R	45	-0.027	Reduced affinity
E	E	150	D	45.7	-0.042	Reduced affinity
E	L	151	M	45.4	-0.038	Reduced affinity
E	P	152	L	52.2	-0.045	Reduced affinity
E	P	152	S	52.2	-0.053	Reduced affinity
E	P	152	T	52.2	-0.056	Reduced affinity
E	T	155	S	51	-0.043	Reduced affinity
E	Y	156	H	28.3	-0.022	Reduced affinity
E	V	157	A	62.2	-0.041	Reduced affinity
E	V	157	T	62.2	-0.056	Reduced affinity
E	Q	158	H	48.4	0.025	Increased affinity
E	Q	158	R	48.4	-0.008	Reduced affinity
E	S	159	N	100.4	-0.054	Reduced affinity
E	T	160	N	82	-0.053	Reduced affinity
E	A	162	V	103.1	-0.046	Reduced affinity
E	T	164	I	80.7	-0.003	Reduced affinity
E	T	164	A	80.7	0.001	Increased affinity
E	E	165	D	59.1	-0.042	Reduced affinity
E	E	166	D	43.7	-0.042	Reduced affinity
E	I	167	M	50.5	-0.038	Reduced affinity
E	I	167	T	50.5	-0.054	Reduced affinity
E	I	167	V	50.5	-0.043	Reduced affinity
E	H	170	N	30.7	-0.054	Reduced affinity
E	M	171	V	40.4	-0.029	Reduced affinity
E	D	174	G	81.3	-0.006	Reduced affinity
E	H	178	R	49.1	-0.056	Reduced affinity
E	T	179	A	75.5	0.001	Increased affinity
E	L	180	I	41.2	-0.044	Reduced affinity
E	M	181	L	31.8	-0.03	Reduced affinity
E	M	181	T	31.8	-0.04	Reduced affinity
E	M	181	V	31.8	-0.029	Reduced affinity
E	S	182	L	86.6	-0.004	Reduced affinity
E	S	182	T	86.6	-0.045	Reduced affinity
E	Q	184	R	47.8	-0.008	Reduced affinity
E	S	185	A	111.2	-0.001	Reduced affinity
E	S	185	C	111.2	-0.042	Reduced affinity
E	S	185	Y	111.2	-0.001	Reduced affinity
E	G	186	S	165.4	-0.058	Reduced affinity
E	N	187	S	34.5	-0.026	Reduced affinity
E	K	189	T	34.3	-0.043	Reduced affinity
E	T	191	A	64.4	0.002	Increased affinity
E	T	191	I	64.4	-0.002	Reduced affinity
E	T	191	S	64.4	-0.042	Reduced affinity
E	G	194	C	219.2	-0.053	Reduced affinity
E	G	194	S	219.2	-0.058	Reduced affinity
E	G	194	N	219.2	-0.065	Reduced affinity
E	Q	195	R	54	-0.008	Reduced affinity
E	V	197	A	34.1	-0.041	Reduced affinity
E	V	197	E	34.1	-0.05	Reduced affinity
E	R	198	Q	23.5	-0.059	Reduced affinity
E	K	200	R	28.2	-0.029	Reduced affinity
E	N	202	D	60.2	-0.034	Reduced affinity
E	N	202	I	60.2	0.011	Increased affinity
E	N	202	S	60.2	-0.026	Reduced affinity
E	G	205	D	193.6	-0.051	Reduced affinity
E	G	205	S	193.6	-0.059	Reduced affinity
E	S	206	L	105.9	-0.003	Reduced affinity
E	N	207	D	65.8	-0.033	Reduced affinity
E	N	207	H	65.8	0.023	Increased affinity
E	N	207	S	65.8	-0.027	Reduced affinity
E	N	207	T	65.8	-0.028	Reduced affinity
E	E	208	D	55	-0.044	Reduced affinity
E	L	210	I	33.6	-0.044	Reduced affinity
E	L	210	Q	33.6	-0.069	Reduced affinity
E	L	210	S	33.6	-0.053	Reduced affinity
E	L	210	T	33.6	-0.055	Reduced affinity
E	L	210	V	33.6	-0.043	Reduced affinity
E	T	211	I	69.9	-0.002	Reduced affinity
E	T	213	I	70.9	-0.002	Reduced affinity
E	T	213	R	70.9	-0.023	Reduced affinity
E	D	214	N	61.9	-0.062	Reduced affinity
E	V	216	E	50.5	-0.05	Reduced affinity
E	V	216	M	50.5	-0.039	Reduced affinity
E	I	217	V	41.2	-0.043	Reduced affinity
E	N	218	G	66	0.016	Increased affinity
E	N	218	S	66	-0.026	Reduced affinity
E	N	219	S	74	-0.026	Reduced affinity
E	K	221	G	40.9	-0.001	Reduced affinity
E	K	221	I	40.9	-0.005	Reduced affinity
E	K	221	R	40.9	-0.027	Reduced affinity
E	V	222	I	49	-0.045	Reduced affinity
E	H	226	Y	47.2	-0.047	Reduced affinity
E	A	227	T	75.9	-0.062	Reduced affinity
E	A	227	V	75.9	-0.046	Reduced affinity
E	A	228	E	51.7	-0.051	Reduced affinity
E	A	228	T	51.7	-0.062	Reduced affinity
E	V	229	I	55.5	-0.046	Reduced affinity
E	N	231	D	80.7	-0.033	Reduced affinity
E	K	233	E	49.5	-0.047	Reduced affinity
E	K	233	R	49.5	-0.027	Reduced affinity
E	K	234	N	35.5	-0.052	Reduced affinity
E	K	234	R	35.5	-0.027	Reduced affinity
E	Y	237	C	31.7	-0.044	Reduced affinity
E	Y	237	D	31.7	-0.044	Reduced affinity
E	Y	237	F	31.7	-0.048	Reduced affinity
E	N	238	S	68.1	-0.027	Reduced affinity
E	P	240	L	45.9	-0.047	Reduced affinity
E	L	241	S	30.5	-0.056	Reduced affinity
E	V	242	G	56	-0.042	Reduced affinity
E	N	245	S	59.3	-0.028	Reduced affinity
E	A	246	D	63.5	-0.05	Reduced affinity
E	A	246	V	63.5	-0.048	Reduced affinity
E	E	247	A	46.8	-0.006	Reduced affinity
E	L	248	A	51.7	-0.041	Reduced affinity
E	L	248	F	51.7	-0.042	Reduced affinity
E	L	248	I	51.7	-0.046	Reduced affinity
E	L	248	P	51.7	-0.044	Reduced affinity
E	L	248	S	51.7	-0.054	Reduced affinity
E	K	252	H	45.1	0.013	Increased affinity
E	K	252	Q	45.1	-0.06	Reduced affinity
E	I	255	L	48.4	-0.043	Reduced affinity
E	I	255	V	48.4	-0.042	Reduced affinity
E	H	256	Y	37.3	-0.048	Reduced affinity
E	I	257	T	48.8	-0.054	Reduced affinity
E	I	257	V	48.8	-0.042	Reduced affinity
E	P	260	L	59.5	-0.045	Reduced affinity
E	P	260	S	59.5	-0.055	Reduced affinity
E	A	262	V	97.6	-0.046	Reduced affinity
E	V	264	A	57.4	-0.041	Reduced affinity
E	T	265	I	62	-0.003	Reduced affinity
E	R	267	M	24.9	-0.013	Reduced affinity
E	R	267	V	24.9	-0.013	Reduced affinity
E	V	268	G	54.8	-0.039	Reduced affinity
E	K	270	R	39.9	-0.028	Reduced affinity
E	A	271	V	94.6	-0.046	Reduced affinity
E	R	272	G	40.6	-0.01	Reduced affinity
E	N	273	I	82.9	0.011	Increased affinity
E	T	275	P	80.1	-0.001	Reduced affinity
E	T	277	A	65.9	0.001	Increased affinity
E	T	277	M	65.9	-0.005	Reduced affinity
E	T	277	S	65.9	-0.043	Reduced affinity
E	G	279	E	187.6	-0.052	Reduced affinity
E	G	279	R	187.6	-0.048	Reduced affinity
E	K	280	R	41	-0.03	Reduced affinity
E	N	281	K	83.9	-0.024	Reduced affinity
E	Q	282	K	30.8	-0.021	Reduced affinity
E	I	284	T	35.1	-0.053	Reduced affinity
E	I	284	V	35.1	-0.043	Reduced affinity
E	M	285	L	34.8	-0.03	Reduced affinity
E	L	286	S	33.2	-0.051	Reduced affinity
E	L	286	V	33.2	-0.042	Reduced affinity
E	Y	288	C	45.6	-0.042	Reduced affinity
E	Y	288	H	45.6	-0.021	Reduced affinity
E	L	294	F	33.9	-0.04	Reduced affinity
E	Y	297	C	26.5	-0.044	Reduced affinity
E	Y	297	F	26.5	-0.048	Reduced affinity
E	N	299	K	47.2	-0.024	Reduced affinity
E	N	299	S	47.2	-0.027	Reduced affinity
E	E	302	Q	52.4	-0.067	Reduced affinity
E	E	303	K	59.2	-0.038	Reduced affinity
E	P	304	S	66.7	-0.055	Reduced affinity
E	P	304	T	66.7	-0.057	Reduced affinity
E	N	305	H	78.9	0.022	Increased affinity
E	Y	306	S	32.3	-0.046	Reduced affinity
E	Q	307	H	55.4	0.024	Increased affinity
E	Q	307	L	55.4	0.016	Increased affinity
E	Q	307	R	55.4	-0.01	Reduced affinity
E	Q	307	S	55.4	-0.023	Reduced affinity
E	E	308	H	44.8	0.007	Increased affinity
E	E	308	K	44.8	-0.038	Reduced affinity
E	E	308	Q	44.8	-0.067	Reduced affinity
E	E	309	Q	58.2	-0.067	Reduced affinity
E	M	312	A	35.8	-0.027	Reduced affinity
E	M	312	T	35.8	-0.039	Reduced affinity
E	H	313	L	53.3	-0.044	Reduced affinity
E	H	313	P	53.3	-0.043	Reduced affinity
E	H	313	R	53.3	-0.054	Reduced affinity
E	H	313	Y	53.3	-0.047	Reduced affinity
E	K	314	R	39.3	-0.027	Reduced affinity
E	E	316	G	46.8	-0.003	Reduced affinity
E	E	316	K	46.8	-0.037	Reduced affinity
E	V	317	I	59.7	-0.045	Reduced affinity
E	V	318	A	50.8	-0.041	Reduced affinity
E	V	318	M	50.8	-0.039	Reduced affinity
E	V	318	R	50.8	-0.042	Reduced affinity
E	V	318	T	50.8	-0.055	Reduced affinity
E	L	319	I	47.1	-0.044	Reduced affinity
E	L	319	V	47.1	-0.043	Reduced affinity
E	T	320	A	62.1	0.002	Increased affinity
E	T	320	I	62.1	-0.002	Reduced affinity
E	V	321	G	49.4	-0.04	Reduced affinity
E	V	328	A	42.5	-0.042	Reduced affinity
E	V	328	I	42.5	-0.046	Reduced affinity
E	W	330	C	29.6	-0.033	Reduced affinity
E	G	331	D	149.9	-0.052	Reduced affinity
E	N	333	K	70.4	-0.023	Reduced affinity
E	E	334	G	66	-0.004	Reduced affinity
E	E	334	V	66	-0.006	Reduced affinity
E	P	335	L	45.9	-0.045	Reduced affinity
E	K	337	E	33.9	-0.045	Reduced affinity
E	K	337	R	33.9	-0.029	Reduced affinity
E	Q	341	H	55.8	0.024	Increased affinity
E	L	342	M	54.8	-0.04	Reduced affinity
E	S	343	P	79.6	-0.001	Reduced affinity
E	T	344	A	45	0.001	Increased affinity
E	G	346	S	235.9	-0.059	Reduced affinity
E	G	350	S	197.8	-0.061	Reduced affinity
E	H	351	E	54.4	-0.046	Reduced affinity
E	H	351	N	54.4	-0.053	Reduced affinity
E	H	351	Q	54.4	-0.057	Reduced affinity
E	H	351	R	54.4	-0.056	Reduced affinity
E	H	351	Y	54.4	-0.047	Reduced affinity
E	P	352	V	62.6	-0.044	Reduced affinity
E	H	353	A	56.9	-0.041	Reduced affinity
E	H	353	E	56.9	-0.046	Reduced affinity
E	H	353	Q	56.9	-0.056	Reduced affinity
E	H	353	R	56.9	-0.054	Reduced affinity
E	H	353	Y	56.9	-0.047	Reduced affinity
E	E	354	D	65.6	-0.043	Reduced affinity
E	I	356	F	47.7	-0.041	Reduced affinity
E	I	356	Y	47.7	-0.037	Reduced affinity
E	L	357	E	39.9	-0.049	Reduced affinity
E	L	357	Q	39.9	-0.068	Reduced affinity
E	L	357	R	39.9	-0.042	Reduced affinity
E	Y	358	S	30.9	-0.047	Reduced affinity
E	E	361	G	57.5	-0.004	Reduced affinity
E	M	366	I	34.1	-0.03	Reduced affinity
E	M	366	K	34.1	-0.04	Reduced affinity
E	M	366	T	34.1	-0.039	Reduced affinity
E	M	366	V	34.1	-0.029	Reduced affinity
E	V	368	A	54.8	-0.041	Reduced affinity
E	V	369	I	41.1	-0.045	Reduced affinity
E	V	370	I	48.9	-0.045	Reduced affinity
E	V	370	A	48.9	-0.041	Reduced affinity
E	V	371	L	49.6	-0.045	Reduced affinity
E	V	371	M	49.6	-0.039	Reduced affinity
E	S	372	A	74.2	-0.001	Reduced affinity
E	V	373	A	49	-0.041	Reduced affinity
E	A	374	V	81	-0.046	Reduced affinity
E	T	375	L	56.4	-0.003	Reduced affinity
E	T	375	S	56.4	-0.042	Reduced affinity
E	F	376	C	34.9	-0.039	Reduced affinity
E	I	377	T	39.6	-0.052	Reduced affinity
E	I	377	V	39.6	-0.042	Reduced affinity
E	S	380	A	73.9	-0.001	Reduced affinity
E	S	380	T	73.9	-0.045	Reduced affinity
E	V	382	M	48.1	-0.039	Reduced affinity
E	M	384	A	35	-0.027	Reduced affinity
E	M	384	T	35	-0.039	Reduced affinity
E	M	384	V	35	-0.029	Reduced affinity
E	A	385	T	66.2	-0.06	Reduced affinity
E	A	386	V	77.4	-0.046	Reduced affinity
E	G	387	W	165.2	-0.032	Reduced affinity
E	C	389	Y	54.7	0.006	Increased affinity
E	M	390	I	34.2	-0.03	Reduced affinity
E	M	390	V	34.2	-0.029	Reduced affinity
E	C	391	Y	55.9	0.006	Increased affinity
E	R	395	G	31.8	-0.011	Reduced affinity
E	R	395	I	31.8	-0.014	Reduced affinity
E	R	395	N	31.8	-0.056	Reduced affinity
E	I	397	L	37	-0.044	Reduced affinity
E	P	404	T	66.5	-0.056	Reduced affinity
E	G	405	R	192	-0.046	Reduced affinity
E	G	405	S	192	-0.059	Reduced affinity
E	G	405	T	192	-0.061	Reduced affinity
E	A	406	T	84.3	-0.06	Reduced affinity
E	A	406	Y	84.3	-0.038	Reduced affinity
E	T	407	A	75.2	0.001	Increased affinity
E	V	408	I	51.7	-0.045	Reduced affinity
E	P	409	A	58.5	-0.041	Reduced affinity
E	P	409	L	58.5	-0.045	Reduced affinity
E	P	409	S	58.5	-0.052	Reduced affinity
E	L	412	V	35.9	-0.042	Reduced affinity
E	S	413	G	81.3	0	Increased affinity
E	S	413	N	81.3	-0.054	Reduced affinity
E	I	415	L	54.3	-0.044	Reduced affinity
E	I	415	M	54.3	-0.038	Reduced affinity
E	I	415	T	54.3	-0.053	Reduced affinity
E	I	415	V	54.3	-0.042	Reduced affinity
E	C	416	G	53.2	0.008	Increased affinity
H	N	5	H	106.8	0.022	Increased affinity
H	N	5	R	106.8	-0.011	Reduced affinity
H	F	6	L	49.1	-0.038	Reduced affinity
H	F	6	S	49.1	-0.04	Reduced affinity
H	F	6	Y	49.1	-0.038	Reduced affinity
H	N	7	D	77.2	-0.034	Reduced affinity
H	N	7	T	77.2	-0.027	Reduced affinity
H	V	8	A	58.2	-0.04	Reduced affinity
H	A	11	V	83.4	-0.046	Reduced affinity
H	T	12	I	47.8	-0.001	Reduced affinity
H	R	13	K	36.2	-0.052	Reduced affinity
H	P	14	Q	45.3	-0.071	Reduced affinity
H	H	18	P	39.1	-0.042	Reduced affinity
H	H	18	Q	39.1	-0.057	Reduced affinity
H	H	18	R	39.1	-0.058	Reduced affinity
H	C	19	G	38.8	0.01	Increased affinity
H	C	19	R	38.8	-0.014	Reduced affinity
H	D	21	V	42.4	-0.007	Reduced affinity
H	G	23	A	232	-0.046	Reduced affinity
H	G	23	E	232	-0.052	Reduced affinity
H	H	26	Y	52.8	-0.047	Reduced affinity
H	S	27	P	70.3	-0.001	Reduced affinity
H	V	32	I	48.7	-0.045	Reduced affinity
H	A	33	V	44.9	-0.046	Reduced affinity
H	L	34	I	43	-0.044	Reduced affinity
H	R	36	H	40.7	0.004	Increased affinity
H	I	37	L	46.2	-0.044	Reduced affinity
H	I	37	V	46.2	-0.042	Reduced affinity
H	N	39	S	63.7	-0.026	Reduced affinity
H	T	42	I	63.5	-0.001	Reduced affinity
H	T	45	R	51.3	-0.023	Reduced affinity
H	L	46	Q	36.3	-0.069	Reduced affinity
H	K	47	H	31.4	0.016	Increased affinity
H	K	47	N	31.4	-0.052	Reduced affinity
H	I	48	L	36.9	-0.043	Reduced affinity
H	V	50	I	38.9	-0.045	Reduced affinity
H	L	52	F	33.6	-0.04	Reduced affinity
H	I	54	L	31.1	-0.043	Reduced affinity
H	G	55	R	145.9	-0.046	Reduced affinity
H	I	56	L	30.5	-0.043	Reduced affinity
H	I	56	T	30.5	-0.053	Reduced affinity
H	K	57	G	30.5	0	Increased affinity
H	K	57	Q	30.5	-0.06	Reduced affinity
H	K	57	R	30.5	-0.027	Reduced affinity
H	D	60	G	64.5	-0.004	Reduced affinity
H	S	61	G	85.3	0.001	Increased affinity
H	S	61	N	85.3	-0.054	Reduced affinity
H	H	62	Y	48.3	-0.048	Reduced affinity
H	D	63	G	65.3	-0.004	Reduced affinity
H	W	64	R	35.5	-0.027	Reduced affinity
H	K	66	E	28.7	-0.046	Reduced affinity
H	Y	69	H	28.6	-0.02	Reduced affinity
H	Y	69	I	28.6	-0.042	Reduced affinity
H	N	72	S	83.9	-0.026	Reduced affinity
H	N	72	T	83.9	-0.027	Reduced affinity
H	H	73	Y	58.2	-0.047	Reduced affinity
H	M	74	L	41.7	-0.03	Reduced affinity
H	M	74	I	41.7	-0.03	Reduced affinity
H	M	74	T	41.7	-0.039	Reduced affinity
H	M	74	V	41.7	-0.029	Reduced affinity
H	A	76	T	86.6	-0.059	Reduced affinity
H	E	79	G	42.9	-0.003	Reduced affinity
H	A	81	V	108.2	-0.046	Reduced affinity
H	G	82	R	174.1	-0.045	Reduced affinity
H	L	83	I	34	-0.043	Reduced affinity
H	F	84	L	44.1	-0.038	Reduced affinity
H	F	84	I	44.1	-0.038	Reduced affinity
H	F	84	S	44.1	-0.042	Reduced affinity
H	V	85	A	42.3	-0.041	Reduced affinity
H	R	86	K	22.3	-0.052	Reduced affinity
H	T	87	S	38.2	-0.043	Reduced affinity
H	S	88	L	96.6	-0.003	Reduced affinity
H	A	89	S	94.1	-0.059	Reduced affinity
H	P	90	L	60	-0.045	Reduced affinity
H	P	90	S	60	-0.054	Reduced affinity
H	T	92	A	78.8	0.002	Increased affinity
H	T	92	M	78.8	-0.004	Reduced affinity
H	T	92	S	78.8	-0.043	Reduced affinity
H	T	94	I	76.2	-0.002	Reduced affinity
H	I	97	T	42.2	-0.054	Reduced affinity
H	I	97	M	42.2	-0.038	Reduced affinity
H	A	103	T	59.4	-0.06	Reduced affinity
H	K	107	R	46.1	-0.028	Reduced affinity
H	G	108	R	133.8	-0.047	Reduced affinity
H	T	110	I	48.6	-0.001	Reduced affinity
H	T	110	S	48.6	-0.043	Reduced affinity
H	L	111	M	32.6	-0.038	Reduced affinity
H	L	111	V	32.6	-0.043	Reduced affinity
H	V	113	A	41.7	-0.041	Reduced affinity
H	F	115	L	24.6	-0.038	Reduced affinity
H	T	116	I	80.3	-0.002	Reduced affinity
H	S	118	G	105.4	0.001	Increased affinity
H	R	119	S	40.1	-0.044	Reduced affinity
H	R	119	W	40.1	-0.012	Reduced affinity
H	K	120	M	39.5	-0.007	Reduced affinity
H	K	120	N	39.5	-0.052	Reduced affinity
H	K	120	S	39.5	-0.042	Reduced affinity
H	I	121	F	50.1	-0.04	Reduced affinity
H	I	121	L	50.1	-0.044	Reduced affinity
H	I	121	M	50.1	-0.037	Reduced affinity
H	I	121	N	50.1	-0.058	Reduced affinity
H	I	121	S	50.1	-0.05	Reduced affinity
H	I	121	T	50.1	-0.052	Reduced affinity
H	I	121	V	50.1	-0.042	Reduced affinity
H	S	122	G	76.8	0.002	Increased affinity
H	S	122	Q	76.8	-0.061	Reduced affinity
H	S	122	R	76.8	-0.023	Reduced affinity
H	H	123	L	47	-0.044	Reduced affinity
H	H	123	P	47	-0.043	Reduced affinity
H	H	123	R	47	-0.056	Reduced affinity
H	H	123	T	47	-0.047	Reduced affinity
H	S	124	T	59.4	-0.045	Reduced affinity
H	T	126	M	65.4	-0.003	Reduced affinity
H	P	128	S	43.4	-0.055	Reduced affinity
H	H	130	R	47.8	-0.055	Reduced affinity
H	H	131	L	48.1	-0.043	Reduced affinity
H	H	131	Y	48.1	-0.047	Reduced affinity
H	D	132	N	82.5	-0.061	Reduced affinity
H	D	132	E	82.5	-0.045	Reduced affinity
H	P	133	S	51.7	-0.053	Reduced affinity
H	P	134	L	64	-0.045	Reduced affinity
H	V	135	A	55.5	-0.041	Reduced affinity
H	V	135	G	55.5	-0.039	Reduced affinity
H	V	135	M	55.5	-0.039	Reduced affinity
H	K	140	R	39.5	-0.027	Reduced affinity
H	H	142	Y	56.2	-0.047	Reduced affinity
H	S	143	A	101.5	0.001	Increased affinity
H	S	143	Y	101.5	0.001	Increased affinity
H	Q	146	H	56.1	0.024	Increased affinity
H	Q	146	R	56.1	-0.013	Reduced affinity
H	H	147	Q	44.6	-0.056	Reduced affinity
H	H	147	Y	44.6	-0.047	Reduced affinity
H	K	149	E	45	-0.046	Reduced affinity
H	K	149	R	45	-0.028	Reduced affinity
H	E	150	D	45.7	-0.043	Reduced affinity
H	L	151	M	45.4	-0.038	Reduced affinity
H	P	152	L	52.2	-0.045	Reduced affinity
H	P	152	S	52.2	-0.053	Reduced affinity
H	P	152	T	52.2	-0.056	Reduced affinity
H	T	155	S	51	-0.043	Reduced affinity
H	Y	156	H	28.3	-0.022	Reduced affinity
H	V	157	A	62.2	-0.041	Reduced affinity
H	V	157	T	62.2	-0.056	Reduced affinity
H	Q	158	H	48.4	0.025	Increased affinity
H	Q	158	R	48.4	-0.008	Reduced affinity
H	S	159	N	100.4	-0.054	Reduced affinity
H	T	160	N	82	-0.053	Reduced affinity
H	A	162	V	103.1	-0.046	Reduced affinity
H	T	164	I	80.7	-0.003	Reduced affinity
H	T	164	A	80.7	0.001	Increased affinity
H	E	165	D	59.1	-0.042	Reduced affinity
H	E	166	D	43.7	-0.042	Reduced affinity
H	I	167	M	50.5	-0.038	Reduced affinity
H	I	167	T	50.5	-0.054	Reduced affinity
H	I	167	V	50.5	-0.043	Reduced affinity
H	H	170	N	30.7	-0.054	Reduced affinity
H	M	171	V	40.4	-0.029	Reduced affinity
H	D	174	G	81.3	-0.006	Reduced affinity
H	H	178	R	49.1	-0.056	Reduced affinity
H	T	179	A	75.5	0.001	Increased affinity
H	L	180	I	41.2	-0.044	Reduced affinity
H	M	181	L	31.8	-0.03	Reduced affinity
H	M	181	T	31.8	-0.04	Reduced affinity
H	M	181	V	31.8	-0.029	Reduced affinity
H	S	182	L	86.6	-0.004	Reduced affinity
H	S	182	T	86.6	-0.045	Reduced affinity
H	Q	184	R	47.8	-0.008	Reduced affinity
H	S	185	A	111.2	-0.001	Reduced affinity
H	S	185	C	111.2	-0.042	Reduced affinity
H	S	185	Y	111.2	-0.001	Reduced affinity
H	G	186	S	165.4	-0.058	Reduced affinity
H	N	187	S	34.5	-0.026	Reduced affinity
H	K	189	T	34.3	-0.043	Reduced affinity
H	T	191	A	64.4	0.002	Increased affinity
H	T	191	I	64.4	-0.002	Reduced affinity
H	T	191	S	64.4	-0.042	Reduced affinity
H	G	194	C	219.2	-0.053	Reduced affinity
H	G	194	S	219.2	-0.058	Reduced affinity
H	G	194	N	219.2	-0.065	Reduced affinity
H	Q	195	R	54	-0.008	Reduced affinity
H	V	197	A	34.1	-0.041	Reduced affinity
H	V	197	E	34.1	-0.05	Reduced affinity
H	R	198	Q	23.5	-0.059	Reduced affinity
H	K	200	R	28.2	-0.029	Reduced affinity
H	N	202	D	60.2	-0.034	Reduced affinity
H	N	202	I	60.2	0.011	Increased affinity
H	N	202	S	60.2	-0.026	Reduced affinity
H	G	205	D	193.6	-0.051	Reduced affinity
H	G	205	S	193.6	-0.059	Reduced affinity
H	S	206	L	105.9	-0.003	Reduced affinity
H	N	207	D	65.8	-0.033	Reduced affinity
H	N	207	H	65.8	0.023	Increased affinity
H	N	207	S	65.8	-0.027	Reduced affinity
H	N	207	T	65.8	-0.028	Reduced affinity
H	E	208	D	55	-0.044	Reduced affinity
H	L	210	I	33.6	-0.045	Reduced affinity
H	L	210	Q	33.6	-0.069	Reduced affinity
H	L	210	S	33.6	-0.053	Reduced affinity
H	L	210	T	33.6	-0.055	Reduced affinity
H	L	210	V	33.6	-0.043	Reduced affinity
H	T	211	I	69.9	-0.002	Reduced affinity
H	T	213	I	70.9	-0.002	Reduced affinity
H	T	213	R	70.9	-0.023	Reduced affinity
H	D	214	N	61.9	-0.062	Reduced affinity
H	V	216	E	50.5	-0.05	Reduced affinity
H	V	216	M	50.5	-0.039	Reduced affinity
H	I	217	V	41.2	-0.043	Reduced affinity
H	N	218	G	66	0.016	Increased affinity
H	N	218	S	66	-0.026	Reduced affinity
H	N	219	S	74	-0.026	Reduced affinity
H	K	221	G	40.9	-0.001	Reduced affinity
H	K	221	I	40.9	-0.005	Reduced affinity
H	K	221	R	40.9	-0.027	Reduced affinity
H	V	222	I	49	-0.045	Reduced affinity
H	H	226	Y	47.2	-0.047	Reduced affinity
H	A	227	T	75.9	-0.062	Reduced affinity
H	A	227	V	75.9	-0.046	Reduced affinity
H	A	228	E	51.7	-0.051	Reduced affinity
H	A	228	T	51.7	-0.062	Reduced affinity
H	V	229	I	55.5	-0.046	Reduced affinity
H	N	231	D	80.7	-0.033	Reduced affinity
H	K	233	E	49.5	-0.047	Reduced affinity
H	K	233	R	49.5	-0.027	Reduced affinity
H	K	234	N	35.5	-0.052	Reduced affinity
H	K	234	R	35.5	-0.027	Reduced affinity
H	Y	237	C	31.7	-0.043	Reduced affinity
H	Y	237	D	31.7	-0.044	Reduced affinity
H	Y	237	F	31.7	-0.048	Reduced affinity
H	N	238	S	68.1	-0.027	Reduced affinity
H	P	240	L	45.9	-0.046	Reduced affinity
H	L	241	S	30.5	-0.056	Reduced affinity
H	V	242	G	56	-0.042	Reduced affinity
H	N	245	S	59.3	-0.028	Reduced affinity
H	A	246	D	63.5	-0.05	Reduced affinity
H	A	246	V	63.5	-0.048	Reduced affinity
H	E	247	A	46.8	-0.005	Reduced affinity
H	L	248	A	51.7	-0.041	Reduced affinity
H	L	248	F	51.7	-0.042	Reduced affinity
H	L	248	I	51.7	-0.045	Reduced affinity
H	L	248	P	51.7	-0.044	Reduced affinity
H	L	248	S	51.7	-0.054	Reduced affinity
H	K	252	H	45.1	0.013	Increased affinity
H	K	252	Q	45.1	-0.06	Reduced affinity
H	I	255	L	48.4	-0.043	Reduced affinity
H	I	255	V	48.4	-0.042	Reduced affinity
H	H	256	Y	37.3	-0.048	Reduced affinity
H	I	257	T	48.8	-0.053	Reduced affinity
H	I	257	V	48.8	-0.042	Reduced affinity
H	P	260	L	59.5	-0.045	Reduced affinity
H	P	260	S	59.5	-0.054	Reduced affinity
H	A	262	V	97.6	-0.046	Reduced affinity
H	V	264	A	57.4	-0.041	Reduced affinity
H	T	265	I	62	-0.003	Reduced affinity
H	R	267	M	24.9	-0.012	Reduced affinity
H	R	267	V	24.9	-0.013	Reduced affinity
H	V	268	G	54.8	-0.04	Reduced affinity
H	K	270	R	39.9	-0.028	Reduced affinity
H	A	271	V	94.6	-0.046	Reduced affinity
H	R	272	G	40.6	-0.01	Reduced affinity
H	N	273	I	82.9	0.011	Increased affinity
H	T	275	P	80.1	-0.001	Reduced affinity
H	T	277	A	65.9	0.001	Increased affinity
H	T	277	M	65.9	-0.005	Reduced affinity
H	T	277	S	65.9	-0.043	Reduced affinity
H	G	279	E	187.6	-0.052	Reduced affinity
H	G	279	R	187.6	-0.047	Reduced affinity
H	K	280	R	41	-0.029	Reduced affinity
H	N	281	K	83.9	-0.024	Reduced affinity
H	Q	282	K	30.8	-0.021	Reduced affinity
H	I	284	T	35.1	-0.054	Reduced affinity
H	I	284	V	35.1	-0.043	Reduced affinity
H	M	285	L	34.8	-0.03	Reduced affinity
H	L	286	S	33.2	-0.051	Reduced affinity
H	L	286	V	33.2	-0.043	Reduced affinity
H	Y	288	C	45.6	-0.043	Reduced affinity
H	Y	288	H	45.6	-0.022	Reduced affinity
H	L	294	F	33.9	-0.04	Reduced affinity
H	Y	297	C	26.5	-0.044	Reduced affinity
H	Y	297	F	26.5	-0.048	Reduced affinity
H	N	299	K	47.2	-0.024	Reduced affinity
H	N	299	S	47.2	-0.027	Reduced affinity
H	E	302	Q	52.4	-0.067	Reduced affinity
H	E	303	K	59.2	-0.038	Reduced affinity
H	P	304	S	66.7	-0.055	Reduced affinity
H	P	304	T	66.7	-0.057	Reduced affinity
H	N	305	H	78.9	0.022	Increased affinity
H	Y	306	S	32.3	-0.046	Reduced affinity
H	Q	307	H	55.4	0.024	Increased affinity
H	Q	307	L	55.4	0.016	Increased affinity
H	Q	307	R	55.4	-0.01	Reduced affinity
H	Q	307	S	55.4	-0.022	Reduced affinity
H	E	308	H	44.8	0.007	Increased affinity
H	E	308	K	44.8	-0.038	Reduced affinity
H	E	308	Q	44.8	-0.067	Reduced affinity
H	E	309	Q	58.2	-0.067	Reduced affinity
H	M	312	A	35.8	-0.027	Reduced affinity
H	M	312	T	35.8	-0.039	Reduced affinity
H	H	313	L	53.3	-0.043	Reduced affinity
H	H	313	P	53.3	-0.043	Reduced affinity
H	H	313	R	53.3	-0.055	Reduced affinity
H	H	313	Y	53.3	-0.047	Reduced affinity
H	K	314	R	39.3	-0.028	Reduced affinity
H	E	316	G	46.8	-0.004	Reduced affinity
H	E	316	K	46.8	-0.037	Reduced affinity
H	V	317	I	59.7	-0.045	Reduced affinity
H	V	318	A	50.8	-0.041	Reduced affinity
H	V	318	M	50.8	-0.039	Reduced affinity
H	V	318	R	50.8	-0.042	Reduced affinity
H	V	318	T	50.8	-0.055	Reduced affinity
H	L	319	I	47.1	-0.044	Reduced affinity
H	L	319	V	47.1	-0.043	Reduced affinity
H	T	320	A	62.1	0.002	Increased affinity
H	T	320	I	62.1	-0.002	Reduced affinity
H	V	321	G	49.4	-0.04	Reduced affinity
H	V	328	A	42.5	-0.042	Reduced affinity
H	V	328	I	42.5	-0.046	Reduced affinity
H	W	330	C	29.6	-0.033	Reduced affinity
H	G	331	D	149.9	-0.052	Reduced affinity
H	N	333	K	70.4	-0.023	Reduced affinity
H	E	334	G	66	-0.004	Reduced affinity
H	E	334	V	66	-0.006	Reduced affinity
H	P	335	L	45.9	-0.045	Reduced affinity
H	K	337	E	33.9	-0.045	Reduced affinity
H	K	337	R	33.9	-0.03	Reduced affinity
H	Q	341	H	55.8	0.024	Increased affinity
H	L	342	M	54.8	-0.04	Reduced affinity
H	S	343	P	79.6	-0.001	Reduced affinity
H	T	344	A	45	0.001	Increased affinity
H	G	346	S	235.9	-0.059	Reduced affinity
H	G	350	S	197.8	-0.061	Reduced affinity
H	H	351	E	54.4	-0.046	Reduced affinity
H	H	351	N	54.4	-0.053	Reduced affinity
H	H	351	Q	54.4	-0.057	Reduced affinity
H	H	351	R	54.4	-0.055	Reduced affinity
H	H	351	Y	54.4	-0.047	Reduced affinity
H	P	352	V	62.6	-0.044	Reduced affinity
H	H	353	A	56.9	-0.041	Reduced affinity
H	H	353	E	56.9	-0.046	Reduced affinity
H	H	353	Q	56.9	-0.056	Reduced affinity
H	H	353	R	56.9	-0.054	Reduced affinity
H	H	353	Y	56.9	-0.047	Reduced affinity
H	E	354	D	65.6	-0.043	Reduced affinity
H	I	356	F	47.7	-0.041	Reduced affinity
H	I	356	Y	47.7	-0.036	Reduced affinity
H	L	357	E	39.9	-0.049	Reduced affinity
H	L	357	Q	39.9	-0.067	Reduced affinity
H	L	357	R	39.9	-0.041	Reduced affinity
H	Y	358	S	30.9	-0.047	Reduced affinity
H	E	361	G	57.5	-0.004	Reduced affinity
H	M	366	I	34.1	-0.03	Reduced affinity
H	M	366	K	34.1	-0.04	Reduced affinity
H	M	366	T	34.1	-0.039	Reduced affinity
H	M	366	V	34.1	-0.029	Reduced affinity
H	V	368	A	54.8	-0.04	Reduced affinity
H	V	369	I	41.1	-0.045	Reduced affinity
H	V	370	I	48.9	-0.045	Reduced affinity
H	V	370	A	48.9	-0.041	Reduced affinity
H	V	371	L	49.6	-0.045	Reduced affinity
H	V	371	M	49.6	-0.039	Reduced affinity
H	S	372	A	74.2	-0.001	Reduced affinity
H	V	373	A	49	-0.04	Reduced affinity
H	A	374	V	81	-0.046	Reduced affinity
H	T	375	L	56.4	-0.003	Reduced affinity
H	T	375	S	56.4	-0.042	Reduced affinity
H	F	376	C	34.9	-0.039	Reduced affinity
H	I	377	T	39.6	-0.052	Reduced affinity
H	I	377	V	39.6	-0.042	Reduced affinity
H	S	380	A	73.9	-0.001	Reduced affinity
H	S	380	T	73.9	-0.045	Reduced affinity
H	V	382	M	48.1	-0.039	Reduced affinity
H	M	384	A	35	-0.027	Reduced affinity
H	M	384	T	35	-0.039	Reduced affinity
H	M	384	V	35	-0.029	Reduced affinity
H	A	385	T	66.2	-0.059	Reduced affinity
H	A	386	V	77.4	-0.046	Reduced affinity
H	G	387	W	165.2	-0.032	Reduced affinity
H	C	389	Y	54.7	0.006	Increased affinity
H	M	390	I	34.2	-0.03	Reduced affinity
H	M	390	V	34.2	-0.029	Reduced affinity
H	C	391	Y	55.9	0.006	Increased affinity
H	R	395	G	31.8	-0.011	Reduced affinity
H	R	395	I	31.8	-0.014	Reduced affinity
H	R	395	N	31.8	-0.056	Reduced affinity
H	I	397	L	37	-0.044	Reduced affinity
H	P	404	T	66.5	-0.056	Reduced affinity
H	G	405	R	192	-0.046	Reduced affinity
H	G	405	S	192	-0.059	Reduced affinity
H	G	405	T	192	-0.061	Reduced affinity
H	A	406	T	84.3	-0.059	Reduced affinity
H	A	406	Y	84.3	-0.038	Reduced affinity
H	T	407	A	75.2	0.001	Increased affinity
H	V	408	I	51.7	-0.045	Reduced affinity
H	P	409	A	58.5	-0.041	Reduced affinity
H	P	409	L	58.5	-0.045	Reduced affinity
H	P	409	S	58.5	-0.052	Reduced affinity
H	L	412	V	35.9	-0.042	Reduced affinity
H	S	413	G	81.3	0	Increased affinity
H	S	413	N	81.3	-0.054	Reduced affinity
H	I	415	L	54.3	-0.044	Reduced affinity
H	I	415	M	54.3	-0.038	Reduced affinity
H	I	415	T	54.3	-0.053	Reduced affinity
H	I	415	V	54.3	-0.042	Reduced affinity
H	C	416	G	53.2	0.008	Increased affinity
K	N	5	H	106.8	0.022	Increased affinity
K	N	5	R	106.8	-0.011	Reduced affinity
K	F	6	L	49.1	-0.038	Reduced affinity
K	F	6	S	49.1	-0.04	Reduced affinity
K	F	6	Y	49.1	-0.038	Reduced affinity
K	N	7	D	77.2	-0.034	Reduced affinity
K	N	7	T	77.2	-0.027	Reduced affinity
K	V	8	A	58.2	-0.04	Reduced affinity
K	A	11	V	83.4	-0.046	Reduced affinity
K	T	12	I	47.8	-0.001	Reduced affinity
K	R	13	K	36.2	-0.052	Reduced affinity
K	P	14	Q	45.3	-0.071	Reduced affinity
K	H	18	P	39.1	-0.042	Reduced affinity
K	H	18	Q	39.1	-0.057	Reduced affinity
K	H	18	R	39.1	-0.057	Reduced affinity
K	C	19	G	38.8	0.01	Increased affinity
K	C	19	R	38.8	-0.013	Reduced affinity
K	D	21	V	42.4	-0.006	Reduced affinity
K	G	23	A	232	-0.045	Reduced affinity
K	G	23	E	232	-0.052	Reduced affinity
K	H	26	Y	52.8	-0.048	Reduced affinity
K	S	27	P	70.3	-0.002	Reduced affinity
K	V	32	I	48.7	-0.045	Reduced affinity
K	A	33	V	44.9	-0.046	Reduced affinity
K	L	34	I	43	-0.044	Reduced affinity
K	R	36	H	40.7	0.004	Increased affinity
K	I	37	L	46.2	-0.044	Reduced affinity
K	I	37	V	46.2	-0.042	Reduced affinity
K	N	39	S	63.7	-0.026	Reduced affinity
K	T	42	I	63.5	-0.001	Reduced affinity
K	T	45	R	51.3	-0.022	Reduced affinity
K	L	46	Q	36.3	-0.069	Reduced affinity
K	K	47	H	31.4	0.016	Increased affinity
K	K	47	N	31.4	-0.052	Reduced affinity
K	I	48	L	36.9	-0.043	Reduced affinity
K	V	50	I	38.9	-0.045	Reduced affinity
K	L	52	F	33.6	-0.04	Reduced affinity
K	I	54	L	31.1	-0.043	Reduced affinity
K	G	55	R	145.9	-0.046	Reduced affinity
K	I	56	L	30.5	-0.043	Reduced affinity
K	I	56	T	30.5	-0.053	Reduced affinity
K	K	57	G	30.5	0	Increased affinity
K	K	57	Q	30.5	-0.06	Reduced affinity
K	K	57	R	30.5	-0.027	Reduced affinity
K	D	60	G	64.5	-0.004	Reduced affinity
K	S	61	G	85.3	0.001	Increased affinity
K	S	61	N	85.3	-0.054	Reduced affinity
K	H	62	Y	48.3	-0.048	Reduced affinity
K	D	63	G	65.3	-0.004	Reduced affinity
K	W	64	R	35.5	-0.027	Reduced affinity
K	K	66	E	28.7	-0.046	Reduced affinity
K	Y	69	H	28.6	-0.02	Reduced affinity
K	Y	69	I	28.6	-0.042	Reduced affinity
K	N	72	S	83.9	-0.026	Reduced affinity
K	N	72	T	83.9	-0.028	Reduced affinity
K	H	73	Y	58.2	-0.047	Reduced affinity
K	M	74	L	41.7	-0.03	Reduced affinity
K	M	74	I	41.7	-0.03	Reduced affinity
K	M	74	T	41.7	-0.039	Reduced affinity
K	M	74	V	41.7	-0.029	Reduced affinity
K	A	76	T	86.6	-0.059	Reduced affinity
K	E	79	G	42.9	-0.003	Reduced affinity
K	A	81	V	108.2	-0.046	Reduced affinity
K	G	82	R	174.1	-0.045	Reduced affinity
K	L	83	I	34	-0.043	Reduced affinity
K	F	84	L	44.1	-0.038	Reduced affinity
K	F	84	I	44.1	-0.038	Reduced affinity
K	F	84	S	44.1	-0.041	Reduced affinity
K	V	85	A	42.3	-0.04	Reduced affinity
K	R	86	K	22.3	-0.052	Reduced affinity
K	T	87	S	38.2	-0.042	Reduced affinity
K	S	88	L	96.6	-0.004	Reduced affinity
K	A	89	S	94.1	-0.056	Reduced affinity
K	P	90	L	60	-0.045	Reduced affinity
K	P	90	S	60	-0.052	Reduced affinity
K	T	92	A	78.8	0.001	Increased affinity
K	T	92	M	78.8	-0.004	Reduced affinity
K	T	92	S	78.8	-0.042	Reduced affinity
K	T	94	I	76.2	-0.003	Reduced affinity
K	I	97	T	42.2	-0.054	Reduced affinity
K	I	97	M	42.2	-0.038	Reduced affinity
K	A	103	T	59.4	-0.06	Reduced affinity
K	K	107	R	46.1	-0.026	Reduced affinity
K	G	108	R	133.8	-0.045	Reduced affinity
K	T	110	I	48.6	-0.002	Reduced affinity
K	T	110	S	48.6	-0.042	Reduced affinity
K	L	111	M	32.6	-0.038	Reduced affinity
K	L	111	V	32.6	-0.042	Reduced affinity
K	V	113	A	41.7	-0.04	Reduced affinity
K	F	115	L	24.6	-0.038	Reduced affinity
K	T	116	I	80.3	-0.002	Reduced affinity
K	S	118	G	105.4	0.001	Increased affinity
K	R	119	S	40.1	-0.044	Reduced affinity
K	R	119	W	40.1	-0.012	Reduced affinity
K	K	120	M	39.5	-0.007	Reduced affinity
K	K	120	N	39.5	-0.052	Reduced affinity
K	K	120	S	39.5	-0.042	Reduced affinity
K	I	121	F	50.1	-0.04	Reduced affinity
K	I	121	L	50.1	-0.043	Reduced affinity
K	I	121	M	50.1	-0.037	Reduced affinity
K	I	121	N	50.1	-0.057	Reduced affinity
K	I	121	S	50.1	-0.05	Reduced affinity
K	I	121	T	50.1	-0.052	Reduced affinity
K	I	121	V	50.1	-0.042	Reduced affinity
K	S	122	G	76.8	0.001	Increased affinity
K	S	122	Q	76.8	-0.061	Reduced affinity
K	S	122	R	76.8	-0.023	Reduced affinity
K	H	123	L	47	-0.044	Reduced affinity
K	H	123	P	47	-0.043	Reduced affinity
K	H	123	R	47	-0.056	Reduced affinity
K	H	123	T	47	-0.047	Reduced affinity
K	S	124	T	59.4	-0.045	Reduced affinity
K	T	126	M	65.4	-0.003	Reduced affinity
K	P	128	S	43.4	-0.052	Reduced affinity
K	H	130	R	47.8	-0.054	Reduced affinity
K	H	131	L	48.1	-0.044	Reduced affinity
K	H	131	Y	48.1	-0.048	Reduced affinity
K	D	132	N	82.5	-0.061	Reduced affinity
K	D	132	E	82.5	-0.045	Reduced affinity
K	P	133	S	51.7	-0.053	Reduced affinity
K	P	134	L	64	-0.045	Reduced affinity
K	V	135	A	55.5	-0.041	Reduced affinity
K	V	135	G	55.5	-0.039	Reduced affinity
K	V	135	M	55.5	-0.039	Reduced affinity
K	K	140	R	39.5	-0.027	Reduced affinity
K	H	142	Y	56.2	-0.048	Reduced affinity
K	S	143	A	101.5	0	Increased affinity
K	S	143	Y	101.5	-0.001	Reduced affinity
K	Q	146	H	56.1	0.024	Increased affinity
K	Q	146	R	56.1	-0.008	Reduced affinity
K	H	147	Q	44.6	-0.056	Reduced affinity
K	H	147	Y	44.6	-0.048	Reduced affinity
K	K	149	E	45	-0.047	Reduced affinity
K	K	149	R	45	-0.026	Reduced affinity
K	E	150	D	45.7	-0.042	Reduced affinity
K	L	151	M	45.4	-0.038	Reduced affinity
K	P	152	L	52.2	-0.045	Reduced affinity
K	P	152	S	52.2	-0.053	Reduced affinity
K	P	152	T	52.2	-0.055	Reduced affinity
K	T	155	S	51	-0.043	Reduced affinity
K	Y	156	H	28.3	-0.021	Reduced affinity
K	V	157	A	62.2	-0.041	Reduced affinity
K	V	157	T	62.2	-0.056	Reduced affinity
K	Q	158	H	48.4	0.025	Increased affinity
K	Q	158	R	48.4	-0.008	Reduced affinity
K	S	159	N	100.4	-0.054	Reduced affinity
K	T	160	N	82	-0.053	Reduced affinity
K	A	162	V	103.1	-0.046	Reduced affinity
K	T	164	I	80.7	-0.003	Reduced affinity
K	T	164	A	80.7	0.001	Increased affinity
K	E	165	D	59.1	-0.042	Reduced affinity
K	E	166	D	43.7	-0.042	Reduced affinity
K	I	167	M	50.5	-0.038	Reduced affinity
K	I	167	T	50.5	-0.054	Reduced affinity
K	I	167	V	50.5	-0.043	Reduced affinity
K	H	170	N	30.7	-0.054	Reduced affinity
K	M	171	V	40.4	-0.029	Reduced affinity
K	D	174	G	81.3	-0.005	Reduced affinity
K	H	178	R	49.1	-0.056	Reduced affinity
K	T	179	A	75.5	0.001	Increased affinity
K	L	180	I	41.2	-0.044	Reduced affinity
K	M	181	L	31.8	-0.03	Reduced affinity
K	M	181	T	31.8	-0.04	Reduced affinity
K	M	181	V	31.8	-0.029	Reduced affinity
K	S	182	L	86.6	-0.004	Reduced affinity
K	S	182	T	86.6	-0.045	Reduced affinity
K	Q	184	R	47.8	-0.008	Reduced affinity
K	S	185	A	111.2	-0.001	Reduced affinity
K	S	185	C	111.2	-0.042	Reduced affinity
K	S	185	Y	111.2	-0.001	Reduced affinity
K	G	186	S	165.4	-0.058	Reduced affinity
K	N	187	S	34.5	-0.026	Reduced affinity
K	K	189	T	34.3	-0.043	Reduced affinity
K	T	191	A	64.4	0.002	Increased affinity
K	T	191	I	64.4	-0.002	Reduced affinity
K	T	191	S	64.4	-0.042	Reduced affinity
K	G	194	C	219.2	-0.053	Reduced affinity
K	G	194	S	219.2	-0.058	Reduced affinity
K	G	194	N	219.2	-0.065	Reduced affinity
K	Q	195	R	54	-0.008	Reduced affinity
K	V	197	A	34.1	-0.041	Reduced affinity
K	V	197	E	34.1	-0.05	Reduced affinity
K	R	198	Q	23.5	-0.059	Reduced affinity
K	K	200	R	28.2	-0.027	Reduced affinity
K	N	202	D	60.2	-0.034	Reduced affinity
K	N	202	I	60.2	0.01	Increased affinity
K	N	202	S	60.2	-0.026	Reduced affinity
K	G	205	D	193.6	-0.052	Reduced affinity
K	G	205	S	193.6	-0.058	Reduced affinity
K	S	206	L	105.9	-0.005	Reduced affinity
K	N	207	D	65.8	-0.034	Reduced affinity
K	N	207	H	65.8	0.022	Increased affinity
K	N	207	S	65.8	-0.026	Reduced affinity
K	N	207	T	65.8	-0.027	Reduced affinity
K	E	208	D	55	-0.042	Reduced affinity
K	L	210	I	33.6	-0.043	Reduced affinity
K	L	210	Q	33.6	-0.067	Reduced affinity
K	L	210	S	33.6	-0.05	Reduced affinity
K	L	210	T	33.6	-0.053	Reduced affinity
K	L	210	V	33.6	-0.042	Reduced affinity
K	T	211	I	69.9	-0.003	Reduced affinity
K	T	213	I	70.9	-0.003	Reduced affinity
K	T	213	R	70.9	-0.022	Reduced affinity
K	D	214	N	61.9	-0.061	Reduced affinity
K	V	216	E	50.5	-0.05	Reduced affinity
K	V	216	M	50.5	-0.039	Reduced affinity
K	I	217	V	41.2	-0.042	Reduced affinity
K	N	218	G	66	0.016	Increased affinity
K	N	218	S	66	-0.026	Reduced affinity
K	N	219	S	74	-0.026	Reduced affinity
K	K	221	G	40.9	-0.001	Reduced affinity
K	K	221	I	40.9	-0.006	Reduced affinity
K	K	221	R	40.9	-0.027	Reduced affinity
K	V	222	I	49	-0.045	Reduced affinity
K	H	226	Y	47.2	-0.047	Reduced affinity
K	A	227	T	75.9	-0.062	Reduced affinity
K	A	227	V	75.9	-0.046	Reduced affinity
K	A	228	E	51.7	-0.051	Reduced affinity
K	A	228	T	51.7	-0.062	Reduced affinity
K	V	229	I	55.5	-0.045	Reduced affinity
K	N	231	D	80.7	-0.033	Reduced affinity
K	K	233	E	49.5	-0.047	Reduced affinity
K	K	233	R	49.5	-0.026	Reduced affinity
K	K	234	N	35.5	-0.052	Reduced affinity
K	K	234	R	35.5	-0.027	Reduced affinity
K	Y	237	C	31.7	-0.044	Reduced affinity
K	Y	237	D	31.7	-0.044	Reduced affinity
K	Y	237	F	31.7	-0.048	Reduced affinity
K	N	238	S	68.1	-0.027	Reduced affinity
K	P	240	L	45.9	-0.046	Reduced affinity
K	L	241	S	30.5	-0.055	Reduced affinity
K	V	242	G	56	-0.042	Reduced affinity
K	N	245	S	59.3	-0.027	Reduced affinity
K	A	246	D	63.5	-0.051	Reduced affinity
K	A	246	V	63.5	-0.047	Reduced affinity
K	E	247	A	46.8	-0.005	Reduced affinity
K	L	248	A	51.7	-0.04	Reduced affinity
K	L	248	F	51.7	-0.041	Reduced affinity
K	L	248	I	51.7	-0.045	Reduced affinity
K	L	248	P	51.7	-0.044	Reduced affinity
K	L	248	S	51.7	-0.053	Reduced affinity
K	K	252	H	45.1	0.013	Increased affinity
K	K	252	Q	45.1	-0.06	Reduced affinity
K	I	255	L	48.4	-0.043	Reduced affinity
K	I	255	V	48.4	-0.042	Reduced affinity
K	H	256	Y	37.3	-0.048	Reduced affinity
K	I	257	T	48.8	-0.053	Reduced affinity
K	I	257	V	48.8	-0.042	Reduced affinity
K	P	260	L	59.5	-0.045	Reduced affinity
K	P	260	S	59.5	-0.054	Reduced affinity
K	A	262	V	97.6	-0.046	Reduced affinity
K	V	264	A	57.4	-0.041	Reduced affinity
K	T	265	I	62	-0.003	Reduced affinity
K	R	267	M	24.9	-0.013	Reduced affinity
K	R	267	V	24.9	-0.014	Reduced affinity
K	V	268	G	54.8	-0.039	Reduced affinity
K	K	270	R	39.9	-0.026	Reduced affinity
K	A	271	V	94.6	-0.046	Reduced affinity
K	R	272	G	40.6	-0.011	Reduced affinity
K	N	273	I	82.9	0.01	Increased affinity
K	T	275	P	80.1	-0.002	Reduced affinity
K	T	277	A	65.9	0.001	Increased affinity
K	T	277	M	65.9	-0.005	Reduced affinity
K	T	277	S	65.9	-0.043	Reduced affinity
K	G	279	E	187.6	-0.052	Reduced affinity
K	G	279	R	187.6	-0.048	Reduced affinity
K	K	280	R	41	-0.029	Reduced affinity
K	N	281	K	83.9	-0.024	Reduced affinity
K	Q	282	K	30.8	-0.021	Reduced affinity
K	I	284	T	35.1	-0.053	Reduced affinity
K	I	284	V	35.1	-0.043	Reduced affinity
K	M	285	L	34.8	-0.03	Reduced affinity
K	L	286	S	33.2	-0.05	Reduced affinity
K	L	286	V	33.2	-0.042	Reduced affinity
K	Y	288	C	45.6	-0.041	Reduced affinity
K	Y	288	H	45.6	-0.02	Reduced affinity
K	L	294	F	33.9	-0.04	Reduced affinity
K	Y	297	C	26.5	-0.044	Reduced affinity
K	Y	297	F	26.5	-0.048	Reduced affinity
K	N	299	K	47.2	-0.024	Reduced affinity
K	N	299	S	47.2	-0.027	Reduced affinity
K	E	302	Q	52.4	-0.067	Reduced affinity
K	E	303	K	59.2	-0.039	Reduced affinity
K	P	304	S	66.7	-0.055	Reduced affinity
K	P	304	T	66.7	-0.057	Reduced affinity
K	N	305	H	78.9	0.022	Increased affinity
K	Y	306	S	32.3	-0.046	Reduced affinity
K	Q	307	H	55.4	0.024	Increased affinity
K	Q	307	L	55.4	0.016	Increased affinity
K	Q	307	R	55.4	-0.01	Reduced affinity
K	Q	307	S	55.4	-0.023	Reduced affinity
K	E	308	H	44.8	0.007	Increased affinity
K	E	308	K	44.8	-0.038	Reduced affinity
K	E	308	Q	44.8	-0.067	Reduced affinity
K	E	309	Q	58.2	-0.067	Reduced affinity
K	M	312	A	35.8	-0.026	Reduced affinity
K	M	312	T	35.8	-0.039	Reduced affinity
K	H	313	L	53.3	-0.044	Reduced affinity
K	H	313	P	53.3	-0.043	Reduced affinity
K	H	313	R	53.3	-0.054	Reduced affinity
K	H	313	Y	53.3	-0.048	Reduced affinity
K	K	314	R	39.3	-0.026	Reduced affinity
K	E	316	G	46.8	-0.003	Reduced affinity
K	E	316	K	46.8	-0.037	Reduced affinity
K	V	317	I	59.7	-0.045	Reduced affinity
K	V	318	A	50.8	-0.041	Reduced affinity
K	V	318	M	50.8	-0.039	Reduced affinity
K	V	318	R	50.8	-0.042	Reduced affinity
K	V	318	T	50.8	-0.055	Reduced affinity
K	L	319	I	47.1	-0.044	Reduced affinity
K	L	319	V	47.1	-0.043	Reduced affinity
K	T	320	A	62.1	0.002	Increased affinity
K	T	320	I	62.1	-0.002	Reduced affinity
K	V	321	G	49.4	-0.04	Reduced affinity
K	V	328	A	42.5	-0.043	Reduced affinity
K	V	328	I	42.5	-0.046	Reduced affinity
K	W	330	C	29.6	-0.033	Reduced affinity
K	G	331	D	149.9	-0.052	Reduced affinity
K	N	333	K	70.4	-0.022	Reduced affinity
K	E	334	G	66	-0.004	Reduced affinity
K	E	334	V	66	-0.006	Reduced affinity
K	P	335	L	45.9	-0.045	Reduced affinity
K	K	337	E	33.9	-0.045	Reduced affinity
K	K	337	R	33.9	-0.029	Reduced affinity
K	Q	341	H	55.8	0.024	Increased affinity
K	L	342	M	54.8	-0.04	Reduced affinity
K	S	343	P	79.6	-0.001	Reduced affinity
K	T	344	A	45	0.001	Increased affinity
K	G	346	S	235.9	-0.059	Reduced affinity
K	G	350	S	197.8	-0.061	Reduced affinity
K	H	351	E	54.4	-0.046	Reduced affinity
K	H	351	N	54.4	-0.053	Reduced affinity
K	H	351	Q	54.4	-0.057	Reduced affinity
K	H	351	R	54.4	-0.056	Reduced affinity
K	H	351	Y	54.4	-0.047	Reduced affinity
K	P	352	V	62.6	-0.044	Reduced affinity
K	H	353	A	56.9	-0.041	Reduced affinity
K	H	353	E	56.9	-0.046	Reduced affinity
K	H	353	Q	56.9	-0.056	Reduced affinity
K	H	353	R	56.9	-0.054	Reduced affinity
K	H	353	Y	56.9	-0.047	Reduced affinity
K	E	354	D	65.6	-0.043	Reduced affinity
K	I	356	F	47.7	-0.041	Reduced affinity
K	I	356	Y	47.7	-0.037	Reduced affinity
K	L	357	E	39.9	-0.049	Reduced affinity
K	L	357	Q	39.9	-0.068	Reduced affinity
K	L	357	R	39.9	-0.042	Reduced affinity
K	Y	358	S	30.9	-0.047	Reduced affinity
K	E	361	G	57.5	-0.004	Reduced affinity
K	M	366	I	34.1	-0.03	Reduced affinity
K	M	366	K	34.1	-0.04	Reduced affinity
K	M	366	T	34.1	-0.039	Reduced affinity
K	M	366	V	34.1	-0.029	Reduced affinity
K	V	368	A	54.8	-0.041	Reduced affinity
K	V	369	I	41.1	-0.045	Reduced affinity
K	V	370	I	48.9	-0.045	Reduced affinity
K	V	370	A	48.9	-0.041	Reduced affinity
K	V	371	L	49.6	-0.045	Reduced affinity
K	V	371	M	49.6	-0.039	Reduced affinity
K	S	372	A	74.2	-0.001	Reduced affinity
K	V	373	A	49	-0.041	Reduced affinity
K	A	374	V	81	-0.046	Reduced affinity
K	T	375	L	56.4	-0.003	Reduced affinity
K	T	375	S	56.4	-0.042	Reduced affinity
K	F	376	C	34.9	-0.039	Reduced affinity
K	I	377	T	39.6	-0.052	Reduced affinity
K	I	377	V	39.6	-0.042	Reduced affinity
K	S	380	A	73.9	-0.001	Reduced affinity
K	S	380	T	73.9	-0.045	Reduced affinity
K	V	382	M	48.1	-0.039	Reduced affinity
K	M	384	A	35	-0.027	Reduced affinity
K	M	384	T	35	-0.04	Reduced affinity
K	M	384	V	35	-0.029	Reduced affinity
K	A	385	T	66.2	-0.06	Reduced affinity
K	A	386	V	77.4	-0.046	Reduced affinity
K	G	387	W	165.2	-0.032	Reduced affinity
K	C	389	Y	54.7	0.006	Increased affinity
K	M	390	I	34.2	-0.03	Reduced affinity
K	M	390	V	34.2	-0.029	Reduced affinity
K	C	391	Y	55.9	0.006	Increased affinity
K	R	395	G	31.8	-0.01	Reduced affinity
K	R	395	I	31.8	-0.013	Reduced affinity
K	R	395	N	31.8	-0.056	Reduced affinity
K	I	397	L	37	-0.045	Reduced affinity
K	P	404	T	66.5	-0.056	Reduced affinity
K	G	405	R	192	-0.046	Reduced affinity
K	G	405	S	192	-0.06	Reduced affinity
K	G	405	T	192	-0.061	Reduced affinity
K	A	406	T	84.3	-0.06	Reduced affinity
K	A	406	Y	84.3	-0.038	Reduced affinity
K	T	407	A	75.2	0.001	Increased affinity
K	V	408	I	51.7	-0.045	Reduced affinity
K	P	409	A	58.5	-0.041	Reduced affinity
K	P	409	L	58.5	-0.045	Reduced affinity
K	P	409	S	58.5	-0.052	Reduced affinity
K	L	412	V	35.9	-0.043	Reduced affinity
K	S	413	G	81.3	0	Increased affinity
K	S	413	N	81.3	-0.054	Reduced affinity
K	I	415	L	54.3	-0.044	Reduced affinity
K	I	415	M	54.3	-0.038	Reduced affinity
K	I	415	T	54.3	-0.053	Reduced affinity
K	I	415	V	54.3	-0.043	Reduced affinity
K	C	416	G	53.2	0.009	Increased affinity

## Sheet: 7CVY Predictions
Supplementary File 4: Table S3: Affinity prediction of Fab-124 (PDB ID: 7CVY) E2-associated polymorphisms
Chain	Wild Residue	Residue Position	Mutant Residue	RSA (%)	Predicted ΔΔG	Outcome
B	N	5	H	108.5	0.022	Increased affinity
B	N	5	R	108.5	-0.011	Reduced affinity
B	F	6	L	48.3	-0.038	Reduced affinity
B	F	6	S	48.3	-0.04	Reduced affinity
B	F	6	Y	48.3	-0.038	Reduced affinity
B	N	7	D	80.7	-0.035	Reduced affinity
B	N	7	T	80.7	-0.027	Reduced affinity
B	V	8	A	61.2	-0.04	Reduced affinity
B	A	11	V	98.4	-0.046	Reduced affinity
B	T	12	I	47.6	-0.001	Reduced affinity
B	R	13	K	39.1	-0.052	Reduced affinity
B	P	14	Q	41.1	-0.071	Reduced affinity
B	H	18	P	35.2	-0.043	Reduced affinity
B	H	18	Q	35.2	-0.058	Reduced affinity
B	H	18	R	35.2	-0.057	Reduced affinity
B	C	19	G	39.2	0.01	Increased affinity
B	C	19	R	39.2	-0.012	Reduced affinity
B	D	21	V	33.5	-0.006	Reduced affinity
B	G	23	A	236.2	-0.045	Reduced affinity
B	G	23	E	236.2	-0.052	Reduced affinity
B	H	26	Y	46.9	-0.048	Reduced affinity
B	S	27	P	68.3	-0.002	Reduced affinity
B	V	32	I	47.1	-0.045	Reduced affinity
B	A	33	V	34.6	-0.046	Reduced affinity
B	L	34	I	41.7	-0.044	Reduced affinity
B	R	36	H	17.1	0.004	Increased affinity
B	I	37	L	38.6	-0.044	Reduced affinity
B	I	37	V	38.6	-0.042	Reduced affinity
B	N	39	S	71.9	-0.026	Reduced affinity
B	T	42	I	61.8	-0.001	Reduced affinity
B	T	45	R	60.8	-0.022	Reduced affinity
B	L	46	Q	38.8	-0.069	Reduced affinity
B	K	47	H	29.6	0.016	Increased affinity
B	K	47	N	29.6	-0.052	Reduced affinity
B	I	48	L	30.6	-0.043	Reduced affinity
B	V	50	I	35.1	-0.045	Reduced affinity
B	L	52	F	31.9	-0.04	Reduced affinity
B	I	54	L	36.5	-0.043	Reduced affinity
B	G	55	R	116.8	-0.046	Reduced affinity
B	I	56	L	35.8	-0.043	Reduced affinity
B	I	56	T	35.8	-0.053	Reduced affinity
B	G	57	K	243.3	-0.06	Reduced affinity
B	G	57	Q	243.3	-0.074	Reduced affinity
B	G	57	R	243.3	-0.046	Reduced affinity
B	D	60	G	59.2	-0.004	Reduced affinity
B	S	61	G	90.6	0.001	Increased affinity
B	S	61	N	90.6	-0.054	Reduced affinity
B	H	62	Y	57.9	-0.048	Reduced affinity
B	D	63	G	68.4	-0.004	Reduced affinity
B	W	64	R	31.2	-0.027	Reduced affinity
B	K	66	E	29.2	-0.046	Reduced affinity
B	Y	69	H	30.6	-0.02	Reduced affinity
B	Y	69	I	30.6	-0.042	Reduced affinity
B	N	72	S	83.5	-0.026	Reduced affinity
B	N	72	T	83.5	-0.028	Reduced affinity
B	H	73	Y	56	-0.047	Reduced affinity
B	I	74	L	47.8	-0.044	Reduced affinity
B	I	74	M	47.8	-0.038	Reduced affinity
B	I	74	T	47.8	-0.053	Reduced affinity
B	I	74	V	47.8	-0.042	Reduced affinity
B	A	76	T	86	-0.059	Reduced affinity
B	G	79	E	158.6	-0.052	Reduced affinity
B	A	81	V	108.1	-0.046	Reduced affinity
B	G	82	R	185.7	-0.045	Reduced affinity
B	L	83	I	41.7	-0.043	Reduced affinity
B	F	84	L	41.6	-0.038	Reduced affinity
B	F	84	I	41.6	-0.038	Reduced affinity
B	F	84	S	41.6	-0.041	Reduced affinity
B	V	85	A	44.4	-0.04	Reduced affinity
B	R	86	K	23.2	-0.052	Reduced affinity
B	T	87	S	36.2	-0.042	Reduced affinity
B	S	88	L	93.9	-0.004	Reduced affinity
B	A	89	S	97.8	-0.056	Reduced affinity
B	P	90	L	55.8	-0.045	Reduced affinity
B	P	90	S	55.8	-0.052	Reduced affinity
B	T	92	A	69.7	0.001	Increased affinity
B	T	92	M	69.7	-0.004	Reduced affinity
B	T	92	S	69.7	-0.042	Reduced affinity
B	T	94	I	56.4	-0.002	Reduced affinity
B	M	97	T	40.4	-0.04	Reduced affinity
B	M	97	I	40.4	-0.029	Reduced affinity
B	A	103	T	42.4	-0.06	Reduced affinity
B	K	107	R	48.9	-0.027	Reduced affinity
B	G	108	R	112.5	-0.045	Reduced affinity
B	T	110	I	39.5	-0.002	Reduced affinity
B	T	110	S	39.5	-0.042	Reduced affinity
B	L	111	M	30.9	-0.038	Reduced affinity
B	L	111	V	30.9	-0.042	Reduced affinity
B	V	113	A	39.5	-0.04	Reduced affinity
B	F	115	L	35.9	-0.038	Reduced affinity
B	T	116	I	83.3	-0.002	Reduced affinity
B	S	118	G	108.4	0.001	Increased affinity
B	R	119	S	40.3	-0.044	Reduced affinity
B	R	119	W	40.3	-0.012	Reduced affinity
B	K	120	M	41.4	-0.007	Reduced affinity
B	K	120	N	41.4	-0.052	Reduced affinity
B	K	120	S	41.4	-0.042	Reduced affinity
B	I	121	F	44.4	-0.04	Reduced affinity
B	I	121	L	44.4	-0.043	Reduced affinity
B	I	121	M	44.4	-0.037	Reduced affinity
B	I	121	N	44.4	-0.057	Reduced affinity
B	I	121	S	44.4	-0.05	Reduced affinity
B	I	121	T	44.4	-0.052	Reduced affinity
B	I	121	V	44.4	-0.042	Reduced affinity
B	S	122	G	92.9	0.001	Increased affinity
B	S	122	Q	92.9	-0.061	Reduced affinity
B	S	122	R	92.9	-0.023	Reduced affinity
B	H	123	L	48	-0.044	Reduced affinity
B	H	123	P	48	-0.043	Reduced affinity
B	H	123	R	48	-0.056	Reduced affinity
B	H	123	T	48	-0.047	Reduced affinity
B	S	124	T	57.7	-0.045	Reduced affinity
B	T	126	M	67.6	-0.003	Reduced affinity
B	P	128	S	45.3	-0.053	Reduced affinity
B	H	130	R	39.4	-0.054	Reduced affinity
B	H	131	L	46.1	-0.044	Reduced affinity
B	H	131	Y	46.1	-0.048	Reduced affinity
B	D	132	N	79.4	-0.061	Reduced affinity
B	D	132	E	79.4	-0.045	Reduced affinity
B	P	133	S	56.3	-0.053	Reduced affinity
B	P	134	L	62.4	-0.045	Reduced affinity
B	V	135	A	38.8	-0.041	Reduced affinity
B	V	135	G	38.8	-0.039	Reduced affinity
B	V	135	M	38.8	-0.039	Reduced affinity
B	K	140	R	44.3	-0.027	Reduced affinity
B	H	142	Y	56	-0.048	Reduced affinity
B	S	143	A	97.2	0	Increased affinity
B	S	143	Y	97.2	0	Increased affinity
B	Q	146	H	52.3	0.024	Increased affinity
B	Q	146	R	52.3	-0.008	Reduced affinity
B	H	147	Q	53.6	-0.056	Reduced affinity
B	H	147	Y	53.6	-0.048	Reduced affinity
B	K	149	E	36.3	-0.047	Reduced affinity
B	K	149	R	36.3	-0.026	Reduced affinity
B	E	150	D	46.5	-0.042	Reduced affinity
B	L	151	M	46.2	-0.038	Reduced affinity
B	P	152	L	49.7	-0.045	Reduced affinity
B	P	152	S	49.7	-0.053	Reduced affinity
B	P	152	T	49.7	-0.055	Reduced affinity
B	T	155	S	49.8	-0.042	Reduced affinity
B	Y	156	H	27.7	-0.021	Reduced affinity
B	V	157	A	56.9	-0.041	Reduced affinity
B	V	157	T	56.9	-0.056	Reduced affinity
B	Q	158	H	56.8	0.025	Increased affinity
B	Q	158	R	56.8	-0.008	Reduced affinity
B	S	159	N	98.6	-0.054	Reduced affinity
B	N	160	T	72.2	-0.027	Reduced affinity
B	A	162	V	82.1	-0.046	Reduced affinity
B	A	164	I	114.2	-0.047	Reduced affinity
B	A	164	T	114.2	-0.059	Reduced affinity
B	E	165	D	62.3	-0.042	Reduced affinity
B	E	166	D	61.2	-0.042	Reduced affinity
B	I	167	M	45.3	-0.038	Reduced affinity
B	I	167	T	45.3	-0.054	Reduced affinity
B	I	167	V	45.3	-0.043	Reduced affinity
B	H	170	N	50.2	-0.054	Reduced affinity
B	M	171	V	42.4	-0.029	Reduced affinity
B	D	174	G	78.2	-0.005	Reduced affinity
B	R	178	H	35.6	0.003	Increased affinity
B	T	179	A	65.4	0.001	Increased affinity
B	L	180	I	35.5	-0.044	Reduced affinity
B	L	181	M	48.7	-0.038	Reduced affinity
B	L	181	T	48.7	-0.055	Reduced affinity
B	L	181	V	48.7	-0.043	Reduced affinity
B	S	182	L	82.6	-0.003	Reduced affinity
B	S	182	T	82.6	-0.045	Reduced affinity
B	Q	184	R	47.4	-0.011	Reduced affinity
B	S	185	A	66.9	0.001	Increased affinity
B	S	185	C	66.9	-0.043	Reduced affinity
B	S	185	Y	66.9	0.001	Increased affinity
B	G	186	S	159	-0.061	Reduced affinity
B	N	187	S	36.1	-0.027	Reduced affinity
B	K	189	T	27.8	-0.044	Reduced affinity
B	T	191	A	59.6	0.002	Increased affinity
B	T	191	I	59.6	-0.001	Reduced affinity
B	T	191	S	59.6	-0.042	Reduced affinity
B	G	194	C	229.1	-0.053	Reduced affinity
B	G	194	S	229.1	-0.058	Reduced affinity
B	G	194	N	229.1	-0.065	Reduced affinity
B	R	195	Q	34.7	-0.06	Reduced affinity
B	V	197	A	35.4	-0.041	Reduced affinity
B	V	197	E	35.4	-0.05	Reduced affinity
B	R	198	Q	21.1	-0.059	Reduced affinity
B	K	200	R	29.8	-0.027	Reduced affinity
B	N	202	D	59.3	-0.034	Reduced affinity
B	N	202	I	59.3	0.01	Increased affinity
B	N	202	S	59.3	-0.026	Reduced affinity
B	G	205	D	237.1	-0.052	Reduced affinity
B	G	205	S	237.1	-0.058	Reduced affinity
B	S	206	L	69.6	-0.004	Reduced affinity
B	N	207	D	60	-0.034	Reduced affinity
B	N	207	H	60	0.022	Increased affinity
B	N	207	S	60	-0.026	Reduced affinity
B	N	207	T	60	-0.027	Reduced affinity
B	E	208	D	65.9	-0.042	Reduced affinity
B	L	210	I	31.9	-0.043	Reduced affinity
B	L	210	Q	31.9	-0.067	Reduced affinity
B	L	210	S	31.9	-0.05	Reduced affinity
B	L	210	T	31.9	-0.053	Reduced affinity
B	L	210	V	31.9	-0.042	Reduced affinity
B	I	211	T	47.8	-0.053	Reduced affinity
B	T	213	I	74.3	-0.002	Reduced affinity
B	T	213	R	74.3	-0.023	Reduced affinity
B	D	214	N	71.8	-0.062	Reduced affinity
B	V	216	E	55.1	-0.05	Reduced affinity
B	V	216	M	55.1	-0.039	Reduced affinity
B	I	217	V	28.1	-0.043	Reduced affinity
B	N	218	G	79.3	0.016	Increased affinity
B	N	218	S	79.3	-0.027	Reduced affinity
B	N	219	S	59.5	-0.026	Reduced affinity
B	K	221	G	47.7	0	Increased affinity
B	K	221	I	47.7	-0.005	Reduced affinity
B	K	221	R	47.7	-0.028	Reduced affinity
B	V	222	I	48.1	-0.045	Reduced affinity
B	H	226	Y	50.6	-0.047	Reduced affinity
B	A	227	T	66.2	-0.062	Reduced affinity
B	A	227	V	66.2	-0.046	Reduced affinity
B	A	228	E	36.8	-0.052	Reduced affinity
B	A	228	T	36.8	-0.061	Reduced affinity
B	V	229	I	63.7	-0.045	Reduced affinity
B	N	231	D	79.9	-0.034	Reduced affinity
B	K	233	E	50.4	-0.047	Reduced affinity
B	K	233	R	50.4	-0.026	Reduced affinity
B	K	234	N	38.3	-0.052	Reduced affinity
B	K	234	R	38.3	-0.026	Reduced affinity
B	Y	237	C	30.8	-0.043	Reduced affinity
B	Y	237	D	30.8	-0.044	Reduced affinity
B	Y	237	F	30.8	-0.048	Reduced affinity
B	N	238	S	71.2	-0.027	Reduced affinity
B	P	240	L	39.1	-0.046	Reduced affinity
B	L	241	S	50.4	-0.054	Reduced affinity
B	V	242	G	33.8	-0.041	Reduced affinity
B	N	245	S	62.2	-0.027	Reduced affinity
B	A	246	D	106.2	-0.051	Reduced affinity
B	A	246	V	106.2	-0.047	Reduced affinity
B	E	247	A	62.3	-0.005	Reduced affinity
B	L	248	A	45.5	-0.04	Reduced affinity
B	L	248	F	45.5	-0.041	Reduced affinity
B	L	248	I	45.5	-0.045	Reduced affinity
B	L	248	P	45.5	-0.043	Reduced affinity
B	L	248	S	45.5	-0.052	Reduced affinity
B	K	252	H	35.6	0.013	Increased affinity
B	K	252	Q	35.6	-0.06	Reduced affinity
B	I	255	L	48.5	-0.043	Reduced affinity
B	I	255	V	48.5	-0.042	Reduced affinity
B	R	256	Y	35.5	-0.012	Reduced affinity
B	I	257	T	54.4	-0.054	Reduced affinity
B	I	257	V	54.4	-0.042	Reduced affinity
B	P	260	L	54.8	-0.045	Reduced affinity
B	P	260	S	54.8	-0.054	Reduced affinity
B	A	262	V	82.1	-0.046	Reduced affinity
B	V	264	A	50.4	-0.041	Reduced affinity
B	T	265	I	53.3	-0.003	Reduced affinity
B	M	267	R	29.3	-0.03	Reduced affinity
B	M	267	V	29.3	-0.029	Reduced affinity
B	V	268	G	58.2	-0.039	Reduced affinity
B	K	270	R	32.5	-0.026	Reduced affinity
B	A	271	V	90.8	-0.046	Reduced affinity
B	R	272	G	37.9	-0.011	Reduced affinity
B	N	273	I	82.8	0.01	Increased affinity
B	T	275	P	78.2	-0.002	Reduced affinity
B	T	277	A	69.5	0.001	Increased affinity
B	T	277	M	69.5	-0.005	Reduced affinity
B	T	277	S	69.5	-0.043	Reduced affinity
B	G	279	E	152.2	-0.052	Reduced affinity
B	G	279	R	152.2	-0.047	Reduced affinity
B	K	280	R	48.5	-0.029	Reduced affinity
B	N	281	K	83.5	-0.024	Reduced affinity
B	Q	282	K	35.5	-0.02	Reduced affinity
B	I	284	T	25.4	-0.053	Reduced affinity
B	I	284	V	25.4	-0.043	Reduced affinity
B	M	285	L	29.8	-0.03	Reduced affinity
B	L	286	S	36.7	-0.05	Reduced affinity
B	L	286	V	36.7	-0.042	Reduced affinity
B	Y	288	C	35.5	-0.041	Reduced affinity
B	Y	288	H	35.5	-0.02	Reduced affinity
B	L	294	F	31.9	-0.04	Reduced affinity
B	Y	297	C	25.3	-0.043	Reduced affinity
B	Y	297	F	25.3	-0.048	Reduced affinity
B	S	299	K	54.3	-0.04	Reduced affinity
B	S	299	N	54.3	-0.055	Reduced affinity
B	E	302	Q	56.7	-0.067	Reduced affinity
B	E	303	K	59.4	-0.038	Reduced affinity
B	P	304	S	65.5	-0.054	Reduced affinity
B	P	304	T	65.5	-0.057	Reduced affinity
B	N	305	H	78.7	0.022	Increased affinity
B	Y	306	S	32.1	-0.046	Reduced affinity
B	Q	307	H	53.3	0.024	Increased affinity
B	Q	307	L	53.3	0.016	Increased affinity
B	Q	307	R	53.3	-0.009	Reduced affinity
B	Q	307	S	53.3	-0.022	Reduced affinity
B	E	308	H	46	0.007	Increased affinity
B	E	308	K	46	-0.038	Reduced affinity
B	E	308	Q	46	-0.067	Reduced affinity
B	E	309	Q	56.6	-0.067	Reduced affinity
B	T	312	A	53.1	0.001	Increased affinity
B	T	312	M	53.1	-0.005	Reduced affinity
B	H	313	L	50.9	-0.044	Reduced affinity
B	H	313	P	50.9	-0.043	Reduced affinity
B	H	313	R	50.9	-0.054	Reduced affinity
B	H	313	Y	50.9	-0.048	Reduced affinity
B	K	314	R	33.3	-0.026	Reduced affinity
B	E	316	G	50.5	-0.003	Reduced affinity
B	E	316	K	50.5	-0.037	Reduced affinity
B	V	317	I	58.1	-0.045	Reduced affinity
B	V	318	A	47.8	-0.04	Reduced affinity
B	V	318	M	47.8	-0.038	Reduced affinity
B	V	318	R	47.8	-0.041	Reduced affinity
B	V	318	T	47.8	-0.054	Reduced affinity
B	L	319	I	44.2	-0.044	Reduced affinity
B	L	319	V	44.2	-0.042	Reduced affinity
B	T	320	A	76.4	0.002	Increased affinity
B	T	320	I	76.4	-0.002	Reduced affinity
B	V	321	G	49.1	-0.04	Reduced affinity
B	V	328	A	37.6	-0.042	Reduced affinity
B	V	328	I	37.6	-0.046	Reduced affinity
B	W	330	C	32.4	-0.033	Reduced affinity
B	G	331	D	157.4	-0.052	Reduced affinity
B	N	333	K	72.8	-0.022	Reduced affinity
B	E	334	G	66.2	-0.004	Reduced affinity
B	E	334	V	66.2	-0.006	Reduced affinity
B	P	335	L	48.8	-0.045	Reduced affinity
B	K	337	E	38.2	-0.045	Reduced affinity
B	K	337	R	38.2	-0.029	Reduced affinity
B	Q	341	H	52.7	0.024	Increased affinity
B	L	342	M	51.4	-0.04	Reduced affinity
B	S	343	P	55.7	-0.002	Reduced affinity
B	A	344	T	74.2	-0.061	Reduced affinity
B	G	346	S	213.3	-0.059	Reduced affinity
B	G	350	S	237.9	-0.059	Reduced affinity
B	H	351	E	47.3	-0.046	Reduced affinity
B	H	351	N	47.3	-0.053	Reduced affinity
B	H	351	Q	47.3	-0.056	Reduced affinity
B	H	351	R	47.3	-0.055	Reduced affinity
B	H	351	Y	47.3	-0.047	Reduced affinity
B	P	352	V	58.5	-0.044	Reduced affinity
B	H	353	A	54.4	-0.041	Reduced affinity
B	H	353	E	54.4	-0.046	Reduced affinity
B	H	353	Q	54.4	-0.056	Reduced affinity
B	H	353	R	54.4	-0.054	Reduced affinity
B	H	353	Y	54.4	-0.047	Reduced affinity
B	E	354	D	63.8	-0.042	Reduced affinity
B	I	356	F	46.7	-0.041	Reduced affinity
B	I	356	Y	46.7	-0.036	Reduced affinity
B	L	357	E	37.2	-0.049	Reduced affinity
B	L	357	Q	37.2	-0.068	Reduced affinity
B	L	357	R	37.2	-0.041	Reduced affinity
B	Y	358	S	34.2	-0.047	Reduced affinity
B	E	361	G	56.3	-0.004	Reduced affinity
B	M	366	I	42.6	-0.03	Reduced affinity
B	M	366	K	42.6	-0.04	Reduced affinity
B	M	366	T	42.6	-0.039	Reduced affinity
B	M	366	V	42.6	-0.029	Reduced affinity
B	V	368	A	39	-0.041	Reduced affinity
B	V	369	I	37.3	-0.045	Reduced affinity
B	V	370	I	44.2	-0.045	Reduced affinity
B	V	370	A	44.2	-0.041	Reduced affinity
B	V	371	L	46.1	-0.045	Reduced affinity
B	V	371	M	46.1	-0.039	Reduced affinity
B	S	372	A	74.1	-0.001	Reduced affinity
B	V	373	A	46.9	-0.04	Reduced affinity
B	A	374	V	78	-0.046	Reduced affinity
B	S	375	L	76.2	-0.004	Reduced affinity
B	S	375	T	76.2	-0.045	Reduced affinity
B	F	376	C	34.2	-0.039	Reduced affinity
B	I	377	T	39.2	-0.053	Reduced affinity
B	I	377	V	39.2	-0.043	Reduced affinity
B	S	380	A	73.7	-0.001	Reduced affinity
B	S	380	T	73.7	-0.045	Reduced affinity
B	V	382	M	46.4	-0.039	Reduced affinity
B	M	384	A	36.1	-0.027	Reduced affinity
B	M	384	T	36.1	-0.04	Reduced affinity
B	M	384	V	36.1	-0.029	Reduced affinity
B	A	385	T	60.8	-0.06	Reduced affinity
B	V	386	A	46.6	-0.041	Reduced affinity
B	G	387	W	166.3	-0.032	Reduced affinity
B	C	389	Y	53.1	0.006	Increased affinity
B	M	390	I	34.4	-0.03	Reduced affinity
B	M	390	V	34.4	-0.029	Reduced affinity
B	C	391	Y	54.7	0.006	Increased affinity
B	R	395	G	28	-0.01	Reduced affinity
B	R	395	I	28	-0.014	Reduced affinity
B	R	395	N	28	-0.056	Reduced affinity
B	I	397	L	33.1	-0.045	Reduced affinity
B	P	404	T	56.5	-0.057	Reduced affinity
B	G	405	R	219	-0.047	Reduced affinity
B	G	405	S	219	-0.06	Reduced affinity
B	G	405	T	219	-0.061	Reduced affinity
B	A	406	T	61.1	-0.06	Reduced affinity
B	A	406	Y	61.1	-0.038	Reduced affinity
B	T	407	A	75.5	0.001	Increased affinity
B	V	408	I	66.1	-0.045	Reduced affinity
B	P	409	A	55.1	-0.041	Reduced affinity
B	P	409	L	55.1	-0.045	Reduced affinity
B	P	409	S	55.1	-0.052	Reduced affinity
B	L	412	V	46.1	-0.042	Reduced affinity
B	S	413	G	53.5	0.001	Increased affinity
B	S	413	N	53.5	-0.054	Reduced affinity
B	I	415	L	56.5	-0.044	Reduced affinity
B	I	415	M	56.5	-0.038	Reduced affinity
B	I	415	T	56.5	-0.052	Reduced affinity
B	I	415	V	56.5	-0.042	Reduced affinity
B	C	416	G	57.1	0.008	Increased affinity
G	N	5	H	108.5	0.022	Increased affinity
G	N	5	R	108.5	-0.011	Reduced affinity
G	F	6	L	48.3	-0.038	Reduced affinity
G	F	6	S	48.3	-0.04	Reduced affinity
G	F	6	Y	48.3	-0.038	Reduced affinity
G	N	7	D	80.7	-0.035	Reduced affinity
G	N	7	T	80.7	-0.027	Reduced affinity
G	V	8	A	61.2	-0.04	Reduced affinity
G	A	11	V	98.4	-0.046	Reduced affinity
G	T	12	I	47.6	-0.001	Reduced affinity
G	R	13	K	39.1	-0.052	Reduced affinity
G	P	14	Q	41.1	-0.071	Reduced affinity
G	H	18	P	35.2	-0.042	Reduced affinity
G	H	18	Q	35.2	-0.057	Reduced affinity
G	H	18	R	35.2	-0.058	Reduced affinity
G	C	19	G	39.2	0.01	Increased affinity
G	C	19	R	39.2	-0.013	Reduced affinity
G	D	21	V	33.5	-0.007	Reduced affinity
G	G	23	A	236.2	-0.045	Reduced affinity
G	G	23	E	236.2	-0.052	Reduced affinity
G	H	26	Y	46.9	-0.047	Reduced affinity
G	S	27	P	68.3	-0.001	Reduced affinity
G	V	32	I	47.1	-0.045	Reduced affinity
G	A	33	V	34.6	-0.046	Reduced affinity
G	L	34	I	41.7	-0.044	Reduced affinity
G	R	36	H	17.1	0.004	Increased affinity
G	I	37	L	38.6	-0.044	Reduced affinity
G	I	37	V	38.6	-0.042	Reduced affinity
G	N	39	S	71.9	-0.026	Reduced affinity
G	T	42	I	61.8	-0.001	Reduced affinity
G	T	45	R	60.8	-0.023	Reduced affinity
G	L	46	Q	38.8	-0.069	Reduced affinity
G	K	47	H	29.6	0.016	Increased affinity
G	K	47	N	29.6	-0.052	Reduced affinity
G	I	48	L	30.6	-0.043	Reduced affinity
G	V	50	I	35.1	-0.045	Reduced affinity
G	L	52	F	31.9	-0.04	Reduced affinity
G	I	54	L	36.5	-0.043	Reduced affinity
G	G	55	R	116.8	-0.046	Reduced affinity
G	I	56	L	35.8	-0.043	Reduced affinity
G	I	56	T	35.8	-0.053	Reduced affinity
G	G	57	K	243.3	-0.06	Reduced affinity
G	G	57	Q	243.3	-0.074	Reduced affinity
G	G	57	R	243.3	-0.046	Reduced affinity
G	D	60	G	59.2	-0.004	Reduced affinity
G	S	61	G	90.6	0.001	Increased affinity
G	S	61	N	90.6	-0.054	Reduced affinity
G	H	62	Y	57.9	-0.048	Reduced affinity
G	D	63	G	68.4	-0.004	Reduced affinity
G	W	64	R	31.2	-0.027	Reduced affinity
G	K	66	E	29.2	-0.046	Reduced affinity
G	Y	69	H	30.6	-0.02	Reduced affinity
G	Y	69	I	30.6	-0.042	Reduced affinity
G	N	72	S	83.5	-0.026	Reduced affinity
G	N	72	T	83.5	-0.027	Reduced affinity
G	H	73	Y	56	-0.047	Reduced affinity
G	I	74	L	47.8	-0.043	Reduced affinity
G	I	74	M	47.8	-0.037	Reduced affinity
G	I	74	T	47.8	-0.053	Reduced affinity
G	I	74	V	47.8	-0.042	Reduced affinity
G	A	76	T	86	-0.059	Reduced affinity
G	G	79	E	158.6	-0.052	Reduced affinity
G	A	81	V	108.1	-0.046	Reduced affinity
G	G	82	R	185.7	-0.045	Reduced affinity
G	L	83	I	41.7	-0.043	Reduced affinity
G	F	84	L	41.6	-0.038	Reduced affinity
G	F	84	I	41.6	-0.038	Reduced affinity
G	F	84	S	41.6	-0.041	Reduced affinity
G	V	85	A	44.4	-0.041	Reduced affinity
G	R	86	K	23.2	-0.052	Reduced affinity
G	T	87	S	36.2	-0.043	Reduced affinity
G	S	88	L	93.9	-0.003	Reduced affinity
G	A	89	S	97.8	-0.059	Reduced affinity
G	P	90	L	55.8	-0.045	Reduced affinity
G	P	90	S	55.8	-0.054	Reduced affinity
G	T	92	A	69.7	0.002	Increased affinity
G	T	92	M	69.7	-0.004	Reduced affinity
G	T	92	S	69.7	-0.043	Reduced affinity
G	T	94	I	56.4	-0.002	Reduced affinity
G	M	97	T	40.4	-0.04	Reduced affinity
G	M	97	I	40.4	-0.029	Reduced affinity
G	A	103	T	42.4	-0.06	Reduced affinity
G	K	107	R	48.9	-0.028	Reduced affinity
G	G	108	R	112.5	-0.047	Reduced affinity
G	T	110	I	39.5	-0.001	Reduced affinity
G	T	110	S	39.5	-0.043	Reduced affinity
G	L	111	M	30.9	-0.038	Reduced affinity
G	L	111	V	30.9	-0.043	Reduced affinity
G	V	113	A	39.5	-0.041	Reduced affinity
G	F	115	L	35.9	-0.038	Reduced affinity
G	T	116	I	83.3	-0.002	Reduced affinity
G	S	118	G	108.4	0.001	Increased affinity
G	R	119	S	40.3	-0.044	Reduced affinity
G	R	119	W	40.3	-0.012	Reduced affinity
G	K	120	M	41.4	-0.007	Reduced affinity
G	K	120	N	41.4	-0.052	Reduced affinity
G	K	120	S	41.4	-0.042	Reduced affinity
G	I	121	F	44.4	-0.04	Reduced affinity
G	I	121	L	44.4	-0.044	Reduced affinity
G	I	121	M	44.4	-0.037	Reduced affinity
G	I	121	N	44.4	-0.058	Reduced affinity
G	I	121	S	44.4	-0.05	Reduced affinity
G	I	121	T	44.4	-0.052	Reduced affinity
G	I	121	V	44.4	-0.042	Reduced affinity
G	S	122	G	92.9	0.001	Increased affinity
G	S	122	Q	92.9	-0.061	Reduced affinity
G	S	122	R	92.9	-0.023	Reduced affinity
G	H	123	L	48	-0.044	Reduced affinity
G	H	123	P	48	-0.043	Reduced affinity
G	H	123	R	48	-0.056	Reduced affinity
G	H	123	T	48	-0.047	Reduced affinity
G	S	124	T	57.7	-0.045	Reduced affinity
G	T	126	M	67.6	-0.003	Reduced affinity
G	P	128	S	45.3	-0.055	Reduced affinity
G	H	130	R	39.4	-0.055	Reduced affinity
G	H	131	L	46.1	-0.044	Reduced affinity
G	H	131	Y	46.1	-0.047	Reduced affinity
G	D	132	N	79.4	-0.062	Reduced affinity
G	D	132	E	79.4	-0.045	Reduced affinity
G	P	133	S	56.3	-0.053	Reduced affinity
G	P	134	L	62.4	-0.045	Reduced affinity
G	V	135	A	38.8	-0.041	Reduced affinity
G	V	135	G	38.8	-0.039	Reduced affinity
G	V	135	M	38.8	-0.039	Reduced affinity
G	K	140	R	44.3	-0.027	Reduced affinity
G	H	142	Y	56	-0.047	Reduced affinity
G	S	143	A	97.2	0.001	Increased affinity
G	S	143	Y	97.2	0.001	Increased affinity
G	Q	146	H	52.3	0.025	Increased affinity
G	Q	146	R	52.3	-0.011	Reduced affinity
G	H	147	Q	53.6	-0.057	Reduced affinity
G	H	147	Y	53.6	-0.047	Reduced affinity
G	K	149	E	36.3	-0.047	Reduced affinity
G	K	149	R	36.3	-0.027	Reduced affinity
G	E	150	D	46.5	-0.042	Reduced affinity
G	L	151	M	46.2	-0.038	Reduced affinity
G	P	152	L	49.7	-0.045	Reduced affinity
G	P	152	S	49.7	-0.053	Reduced affinity
G	P	152	T	49.7	-0.055	Reduced affinity
G	T	155	S	49.8	-0.043	Reduced affinity
G	Y	156	H	27.7	-0.022	Reduced affinity
G	V	157	A	56.9	-0.041	Reduced affinity
G	V	157	T	56.9	-0.056	Reduced affinity
G	Q	158	H	56.8	0.025	Increased affinity
G	Q	158	R	56.8	-0.008	Reduced affinity
G	S	159	N	98.6	-0.054	Reduced affinity
G	N	160	T	72.2	-0.027	Reduced affinity
G	A	162	V	82.1	-0.046	Reduced affinity
G	A	164	I	114.2	-0.047	Reduced affinity
G	A	164	T	114.2	-0.059	Reduced affinity
G	E	165	D	62.3	-0.042	Reduced affinity
G	E	166	D	61.2	-0.042	Reduced affinity
G	I	167	M	45.3	-0.038	Reduced affinity
G	I	167	T	45.3	-0.053	Reduced affinity
G	I	167	V	45.3	-0.042	Reduced affinity
G	H	170	N	50.2	-0.054	Reduced affinity
G	M	171	V	42.4	-0.029	Reduced affinity
G	D	174	G	78.2	-0.005	Reduced affinity
G	R	178	H	35.6	0.003	Increased affinity
G	T	179	A	65.4	0.001	Increased affinity
G	L	180	I	35.5	-0.044	Reduced affinity
G	L	181	M	48.7	-0.038	Reduced affinity
G	L	181	T	48.7	-0.054	Reduced affinity
G	L	181	V	48.7	-0.043	Reduced affinity
G	S	182	L	82.6	-0.003	Reduced affinity
G	S	182	T	82.6	-0.045	Reduced affinity
G	Q	184	R	47.4	-0.011	Reduced affinity
G	S	185	A	66.9	0.001	Increased affinity
G	S	185	C	66.9	-0.043	Reduced affinity
G	S	185	Y	66.9	0.001	Increased affinity
G	G	186	S	159	-0.061	Reduced affinity
G	N	187	S	36.1	-0.027	Reduced affinity
G	K	189	T	27.8	-0.044	Reduced affinity
G	T	191	A	59.6	0.002	Increased affinity
G	T	191	I	59.6	-0.001	Reduced affinity
G	T	191	S	59.6	-0.042	Reduced affinity
G	G	194	C	229.1	-0.053	Reduced affinity
G	G	194	S	229.1	-0.058	Reduced affinity
G	G	194	N	229.1	-0.065	Reduced affinity
G	R	195	Q	34.7	-0.06	Reduced affinity
G	V	197	A	35.4	-0.041	Reduced affinity
G	V	197	E	35.4	-0.05	Reduced affinity
G	R	198	Q	21.1	-0.06	Reduced affinity
G	K	200	R	29.8	-0.027	Reduced affinity
G	N	202	D	59.3	-0.034	Reduced affinity
G	N	202	I	59.3	0.01	Increased affinity
G	N	202	S	59.3	-0.026	Reduced affinity
G	G	205	D	237.1	-0.052	Reduced affinity
G	G	205	S	237.1	-0.058	Reduced affinity
G	S	206	L	69.6	-0.004	Reduced affinity
G	N	207	D	60	-0.034	Reduced affinity
G	N	207	H	60	0.022	Increased affinity
G	N	207	S	60	-0.026	Reduced affinity
G	N	207	T	60	-0.027	Reduced affinity
G	E	208	D	65.9	-0.042	Reduced affinity
G	L	210	I	31.9	-0.043	Reduced affinity
G	L	210	Q	31.9	-0.067	Reduced affinity
G	L	210	S	31.9	-0.05	Reduced affinity
G	L	210	T	31.9	-0.053	Reduced affinity
G	L	210	V	31.9	-0.042	Reduced affinity
G	I	211	T	47.8	-0.053	Reduced affinity
G	T	213	I	74.3	-0.002	Reduced affinity
G	T	213	R	74.3	-0.023	Reduced affinity
G	D	214	N	71.8	-0.062	Reduced affinity
G	V	216	E	55.1	-0.05	Reduced affinity
G	V	216	M	55.1	-0.039	Reduced affinity
G	I	217	V	28.1	-0.043	Reduced affinity
G	N	218	G	79.3	0.016	Increased affinity
G	N	218	S	79.3	-0.026	Reduced affinity
G	N	219	S	59.5	-0.026	Reduced affinity
G	K	221	G	47.7	-0.001	Reduced affinity
G	K	221	I	47.7	-0.005	Reduced affinity
G	K	221	R	47.7	-0.028	Reduced affinity
G	V	222	I	48.1	-0.045	Reduced affinity
G	H	226	Y	50.6	-0.047	Reduced affinity
G	A	227	T	66.2	-0.062	Reduced affinity
G	A	227	V	66.2	-0.046	Reduced affinity
G	A	228	E	36.8	-0.051	Reduced affinity
G	A	228	T	36.8	-0.061	Reduced affinity
G	V	229	I	63.7	-0.045	Reduced affinity
G	N	231	D	79.9	-0.034	Reduced affinity
G	K	233	E	50.4	-0.047	Reduced affinity
G	K	233	R	50.4	-0.026	Reduced affinity
G	K	234	N	38.3	-0.052	Reduced affinity
G	K	234	R	38.3	-0.026	Reduced affinity
G	Y	237	C	30.8	-0.043	Reduced affinity
G	Y	237	D	30.8	-0.044	Reduced affinity
G	Y	237	F	30.8	-0.048	Reduced affinity
G	N	238	S	71.2	-0.027	Reduced affinity
G	P	240	L	39.1	-0.046	Reduced affinity
G	L	241	S	50.4	-0.054	Reduced affinity
G	V	242	G	33.8	-0.041	Reduced affinity
G	N	245	S	62.2	-0.027	Reduced affinity
G	A	246	D	106.2	-0.051	Reduced affinity
G	A	246	V	106.2	-0.046	Reduced affinity
G	E	247	A	62.3	-0.005	Reduced affinity
G	L	248	A	45.5	-0.04	Reduced affinity
G	L	248	F	45.5	-0.041	Reduced affinity
G	L	248	I	45.5	-0.044	Reduced affinity
G	L	248	P	45.5	-0.043	Reduced affinity
G	L	248	S	45.5	-0.051	Reduced affinity
G	K	252	H	35.6	0.013	Increased affinity
G	K	252	Q	35.6	-0.06	Reduced affinity
G	I	255	L	48.5	-0.043	Reduced affinity
G	I	255	V	48.5	-0.042	Reduced affinity
G	R	256	Y	35.5	-0.012	Reduced affinity
G	I	257	T	54.4	-0.054	Reduced affinity
G	I	257	V	54.4	-0.042	Reduced affinity
G	P	260	L	54.8	-0.045	Reduced affinity
G	P	260	S	54.8	-0.055	Reduced affinity
G	A	262	V	82.1	-0.046	Reduced affinity
G	V	264	A	50.4	-0.041	Reduced affinity
G	T	265	I	53.3	-0.003	Reduced affinity
G	M	267	R	29.3	-0.031	Reduced affinity
G	M	267	V	29.3	-0.029	Reduced affinity
G	V	268	G	58.2	-0.039	Reduced affinity
G	K	270	R	32.5	-0.028	Reduced affinity
G	A	271	V	90.8	-0.046	Reduced affinity
G	R	272	G	37.9	-0.01	Reduced affinity
G	N	273	I	82.8	0.011	Increased affinity
G	T	275	P	78.2	-0.001	Reduced affinity
G	T	277	A	69.5	0.001	Increased affinity
G	T	277	M	69.5	-0.004	Reduced affinity
G	T	277	S	69.5	-0.043	Reduced affinity
G	G	279	E	152.2	-0.052	Reduced affinity
G	G	279	R	152.2	-0.047	Reduced affinity
G	K	280	R	48.5	-0.029	Reduced affinity
G	N	281	K	83.5	-0.024	Reduced affinity
G	Q	282	K	35.5	-0.021	Reduced affinity
G	I	284	T	25.4	-0.053	Reduced affinity
G	I	284	V	25.4	-0.043	Reduced affinity
G	M	285	L	29.8	-0.03	Reduced affinity
G	L	286	S	36.7	-0.051	Reduced affinity
G	L	286	V	36.7	-0.042	Reduced affinity
G	Y	288	C	35.5	-0.043	Reduced affinity
G	Y	288	H	35.5	-0.022	Reduced affinity
G	L	294	F	31.9	-0.04	Reduced affinity
G	Y	297	C	25.3	-0.043	Reduced affinity
G	Y	297	F	25.3	-0.048	Reduced affinity
G	S	299	K	54.3	-0.041	Reduced affinity
G	S	299	N	54.3	-0.055	Reduced affinity
G	E	302	Q	56.7	-0.067	Reduced affinity
G	E	303	K	59.4	-0.038	Reduced affinity
G	P	304	S	65.5	-0.055	Reduced affinity
G	P	304	T	65.5	-0.057	Reduced affinity
G	N	305	H	78.7	0.022	Increased affinity
G	Y	306	S	32.1	-0.046	Reduced affinity
G	Q	307	H	53.3	0.024	Increased affinity
G	Q	307	L	53.3	0.016	Increased affinity
G	Q	307	R	53.3	-0.01	Reduced affinity
G	Q	307	S	53.3	-0.022	Reduced affinity
G	E	308	H	46	0.007	Increased affinity
G	E	308	K	46	-0.038	Reduced affinity
G	E	308	Q	46	-0.067	Reduced affinity
G	E	309	Q	56.6	-0.067	Reduced affinity
G	T	312	A	53.1	0.001	Increased affinity
G	T	312	M	53.1	-0.004	Reduced affinity
G	H	313	L	50.9	-0.043	Reduced affinity
G	H	313	P	50.9	-0.043	Reduced affinity
G	H	313	R	50.9	-0.055	Reduced affinity
G	H	313	Y	50.9	-0.047	Reduced affinity
G	K	314	R	33.3	-0.027	Reduced affinity
G	E	316	G	50.5	-0.004	Reduced affinity
G	E	316	K	50.5	-0.037	Reduced affinity
G	V	317	I	58.1	-0.045	Reduced affinity
G	V	318	A	47.8	-0.04	Reduced affinity
G	V	318	M	47.8	-0.038	Reduced affinity
G	V	318	R	47.8	-0.041	Reduced affinity
G	V	318	T	47.8	-0.054	Reduced affinity
G	L	319	I	44.2	-0.044	Reduced affinity
G	L	319	V	44.2	-0.042	Reduced affinity
G	T	320	A	76.4	0.002	Increased affinity
G	T	320	I	76.4	-0.002	Reduced affinity
G	V	321	G	49.1	-0.04	Reduced affinity
G	V	328	A	37.6	-0.042	Reduced affinity
G	V	328	I	37.6	-0.046	Reduced affinity
G	W	330	C	32.4	-0.033	Reduced affinity
G	G	331	D	157.4	-0.052	Reduced affinity
G	N	333	K	72.8	-0.023	Reduced affinity
G	E	334	G	66.2	-0.004	Reduced affinity
G	E	334	V	66.2	-0.006	Reduced affinity
G	P	335	L	48.8	-0.045	Reduced affinity
G	K	337	E	38.2	-0.045	Reduced affinity
G	K	337	R	38.2	-0.029	Reduced affinity
G	Q	341	H	52.7	0.024	Increased affinity
G	L	342	M	51.4	-0.04	Reduced affinity
G	S	343	P	55.7	-0.002	Reduced affinity
G	A	344	T	74.2	-0.061	Reduced affinity
G	G	346	S	213.3	-0.06	Reduced affinity
G	G	350	S	237.9	-0.059	Reduced affinity
G	H	351	E	47.3	-0.046	Reduced affinity
G	H	351	N	47.3	-0.053	Reduced affinity
G	H	351	Q	47.3	-0.056	Reduced affinity
G	H	351	R	47.3	-0.055	Reduced affinity
G	H	351	Y	47.3	-0.047	Reduced affinity
G	P	352	V	58.5	-0.044	Reduced affinity
G	H	353	A	54.4	-0.041	Reduced affinity
G	H	353	E	54.4	-0.046	Reduced affinity
G	H	353	Q	54.4	-0.056	Reduced affinity
G	H	353	R	54.4	-0.054	Reduced affinity
G	H	353	Y	54.4	-0.047	Reduced affinity
G	E	354	D	63.8	-0.042	Reduced affinity
G	I	356	F	46.7	-0.041	Reduced affinity
G	I	356	Y	46.7	-0.036	Reduced affinity
G	L	357	E	37.2	-0.049	Reduced affinity
G	L	357	Q	37.2	-0.068	Reduced affinity
G	L	357	R	37.2	-0.041	Reduced affinity
G	Y	358	S	34.2	-0.047	Reduced affinity
G	E	361	G	56.3	-0.004	Reduced affinity
G	M	366	I	42.6	-0.03	Reduced affinity
G	M	366	K	42.6	-0.04	Reduced affinity
G	M	366	T	42.6	-0.039	Reduced affinity
G	M	366	V	42.6	-0.029	Reduced affinity
G	V	368	A	39	-0.041	Reduced affinity
G	V	369	I	37.3	-0.045	Reduced affinity
G	V	370	I	44.2	-0.045	Reduced affinity
G	V	370	A	44.2	-0.041	Reduced affinity
G	V	371	L	46.1	-0.045	Reduced affinity
G	V	371	M	46.1	-0.039	Reduced affinity
G	S	372	A	74.1	-0.001	Reduced affinity
G	V	373	A	46.9	-0.04	Reduced affinity
G	A	374	V	78	-0.046	Reduced affinity
G	S	375	L	76.2	-0.004	Reduced affinity
G	S	375	T	76.2	-0.045	Reduced affinity
G	F	376	C	34.2	-0.039	Reduced affinity
G	I	377	T	39.2	-0.052	Reduced affinity
G	I	377	V	39.2	-0.042	Reduced affinity
G	S	380	A	73.7	-0.001	Reduced affinity
G	S	380	T	73.7	-0.045	Reduced affinity
G	V	382	M	46.4	-0.039	Reduced affinity
G	M	384	A	36.1	-0.027	Reduced affinity
G	M	384	T	36.1	-0.039	Reduced affinity
G	M	384	V	36.1	-0.029	Reduced affinity
G	A	385	T	60.8	-0.06	Reduced affinity
G	V	386	A	46.6	-0.041	Reduced affinity
G	G	387	W	166.3	-0.032	Reduced affinity
G	C	389	Y	53.1	0.006	Increased affinity
G	M	390	I	34.4	-0.03	Reduced affinity
G	M	390	V	34.4	-0.029	Reduced affinity
G	C	391	Y	54.7	0.006	Increased affinity
G	R	395	G	28	-0.011	Reduced affinity
G	R	395	I	28	-0.014	Reduced affinity
G	R	395	N	28	-0.057	Reduced affinity
G	I	397	L	33.1	-0.044	Reduced affinity
G	P	404	T	56.5	-0.057	Reduced affinity
G	G	405	R	219	-0.047	Reduced affinity
G	G	405	S	219	-0.06	Reduced affinity
G	G	405	T	219	-0.061	Reduced affinity
G	A	406	T	61.1	-0.06	Reduced affinity
G	A	406	Y	61.1	-0.038	Reduced affinity
G	T	407	A	75.5	0.001	Increased affinity
G	V	408	I	66.1	-0.045	Reduced affinity
G	P	409	A	55.1	-0.041	Reduced affinity
G	P	409	L	55.1	-0.045	Reduced affinity
G	P	409	S	55.1	-0.052	Reduced affinity
G	L	412	V	46.1	-0.042	Reduced affinity
G	S	413	G	53.5	0.001	Increased affinity
G	S	413	N	53.5	-0.054	Reduced affinity
G	I	415	L	56.5	-0.044	Reduced affinity
G	I	415	M	56.5	-0.037	Reduced affinity
G	I	415	T	56.5	-0.052	Reduced affinity
G	I	415	V	56.5	-0.042	Reduced affinity
G	C	416	G	57.1	0.008	Increased affinity
L	N	5	H	108.5	0.022	Increased affinity
L	N	5	R	108.5	-0.011	Reduced affinity
L	F	6	L	48.3	-0.038	Reduced affinity
L	F	6	S	48.3	-0.04	Reduced affinity
L	F	6	Y	48.3	-0.038	Reduced affinity
L	N	7	D	80.7	-0.035	Reduced affinity
L	N	7	T	80.7	-0.027	Reduced affinity
L	V	8	A	61.2	-0.04	Reduced affinity
L	A	11	V	98.4	-0.046	Reduced affinity
L	T	12	I	47.6	-0.001	Reduced affinity
L	R	13	K	39.1	-0.052	Reduced affinity
L	P	14	Q	41.1	-0.071	Reduced affinity
L	H	18	P	35.2	-0.042	Reduced affinity
L	H	18	Q	35.2	-0.057	Reduced affinity
L	H	18	R	35.2	-0.058	Reduced affinity
L	C	19	G	39.2	0.011	Increased affinity
L	C	19	R	39.2	-0.013	Reduced affinity
L	D	21	V	33.5	-0.007	Reduced affinity
L	G	23	A	236.2	-0.045	Reduced affinity
L	G	23	E	236.2	-0.052	Reduced affinity
L	H	26	Y	46.9	-0.047	Reduced affinity
L	S	27	P	68.3	-0.002	Reduced affinity
L	V	32	I	47.1	-0.045	Reduced affinity
L	A	33	V	34.6	-0.046	Reduced affinity
L	L	34	I	41.7	-0.044	Reduced affinity
L	R	36	H	17.1	0.004	Increased affinity
L	I	37	L	38.6	-0.044	Reduced affinity
L	I	37	V	38.6	-0.042	Reduced affinity
L	N	39	S	71.9	-0.026	Reduced affinity
L	T	42	I	61.8	-0.001	Reduced affinity
L	T	45	R	60.8	-0.023	Reduced affinity
L	L	46	Q	38.8	-0.069	Reduced affinity
L	K	47	H	29.6	0.016	Increased affinity
L	K	47	N	29.6	-0.052	Reduced affinity
L	I	48	L	30.6	-0.043	Reduced affinity
L	V	50	I	35.1	-0.045	Reduced affinity
L	L	52	F	31.9	-0.04	Reduced affinity
L	I	54	L	36.5	-0.043	Reduced affinity
L	G	55	R	116.8	-0.046	Reduced affinity
L	I	56	L	35.8	-0.043	Reduced affinity
L	I	56	T	35.8	-0.053	Reduced affinity
L	G	57	K	243.3	-0.06	Reduced affinity
L	G	57	Q	243.3	-0.074	Reduced affinity
L	G	57	R	243.3	-0.046	Reduced affinity
L	D	60	G	59.2	-0.004	Reduced affinity
L	S	61	G	90.6	0.001	Increased affinity
L	S	61	N	90.6	-0.054	Reduced affinity
L	H	62	Y	57.9	-0.048	Reduced affinity
L	D	63	G	68.4	-0.004	Reduced affinity
L	W	64	R	31.2	-0.027	Reduced affinity
L	K	66	E	29.2	-0.046	Reduced affinity
L	Y	69	H	30.6	-0.02	Reduced affinity
L	Y	69	I	30.6	-0.042	Reduced affinity
L	N	72	S	83.5	-0.026	Reduced affinity
L	N	72	T	83.5	-0.028	Reduced affinity
L	H	73	Y	56	-0.047	Reduced affinity
L	I	74	L	47.8	-0.044	Reduced affinity
L	I	74	M	47.8	-0.038	Reduced affinity
L	I	74	T	47.8	-0.053	Reduced affinity
L	I	74	V	47.8	-0.042	Reduced affinity
L	A	76	T	86	-0.059	Reduced affinity
L	G	79	E	158.6	-0.052	Reduced affinity
L	A	81	V	108.1	-0.046	Reduced affinity
L	G	82	R	185.7	-0.045	Reduced affinity
L	L	83	I	41.7	-0.043	Reduced affinity
L	F	84	L	41.6	-0.038	Reduced affinity
L	F	84	I	41.6	-0.038	Reduced affinity
L	F	84	S	41.6	-0.041	Reduced affinity
L	V	85	A	44.4	-0.041	Reduced affinity
L	R	86	K	23.2	-0.052	Reduced affinity
L	T	87	S	36.2	-0.043	Reduced affinity
L	S	88	L	93.9	-0.003	Reduced affinity
L	A	89	S	97.8	-0.059	Reduced affinity
L	P	90	L	55.8	-0.045	Reduced affinity
L	P	90	S	55.8	-0.054	Reduced affinity
L	T	92	A	69.7	0.002	Increased affinity
L	T	92	M	69.7	-0.004	Reduced affinity
L	T	92	S	69.7	-0.043	Reduced affinity
L	T	94	I	56.4	-0.002	Reduced affinity
L	M	97	T	40.4	-0.04	Reduced affinity
L	M	97	I	40.4	-0.029	Reduced affinity
L	A	103	T	42.4	-0.06	Reduced affinity
L	K	107	R	48.9	-0.027	Reduced affinity
L	G	108	R	112.5	-0.047	Reduced affinity
L	T	110	I	39.5	-0.001	Reduced affinity
L	T	110	S	39.5	-0.043	Reduced affinity
L	L	111	M	30.9	-0.038	Reduced affinity
L	L	111	V	30.9	-0.043	Reduced affinity
L	V	113	A	39.5	-0.041	Reduced affinity
L	F	115	L	35.9	-0.038	Reduced affinity
L	T	116	I	83.3	-0.002	Reduced affinity
L	S	118	G	108.4	0.001	Increased affinity
L	R	119	S	40.3	-0.044	Reduced affinity
L	R	119	W	40.3	-0.012	Reduced affinity
L	K	120	M	41.4	-0.007	Reduced affinity
L	K	120	N	41.4	-0.052	Reduced affinity
L	K	120	S	41.4	-0.042	Reduced affinity
L	I	121	F	44.4	-0.04	Reduced affinity
L	I	121	L	44.4	-0.044	Reduced affinity
L	I	121	M	44.4	-0.037	Reduced affinity
L	I	121	N	44.4	-0.058	Reduced affinity
L	I	121	S	44.4	-0.05	Reduced affinity
L	I	121	T	44.4	-0.052	Reduced affinity
L	I	121	V	44.4	-0.042	Reduced affinity
L	S	122	G	92.9	0.001	Increased affinity
L	S	122	Q	92.9	-0.061	Reduced affinity
L	S	122	R	92.9	-0.023	Reduced affinity
L	H	123	L	48	-0.044	Reduced affinity
L	H	123	P	48	-0.043	Reduced affinity
L	H	123	R	48	-0.056	Reduced affinity
L	H	123	T	48	-0.047	Reduced affinity
L	S	124	T	57.7	-0.045	Reduced affinity
L	T	126	M	67.6	-0.003	Reduced affinity
L	P	128	S	45.3	-0.054	Reduced affinity
L	H	130	R	39.4	-0.055	Reduced affinity
L	H	131	L	46.1	-0.044	Reduced affinity
L	H	131	Y	46.1	-0.047	Reduced affinity
L	D	132	N	79.4	-0.062	Reduced affinity
L	D	132	E	79.4	-0.045	Reduced affinity
L	P	133	S	56.3	-0.053	Reduced affinity
L	P	134	L	62.4	-0.045	Reduced affinity
L	V	135	A	38.8	-0.041	Reduced affinity
L	V	135	G	38.8	-0.039	Reduced affinity
L	V	135	M	38.8	-0.039	Reduced affinity
L	K	140	R	44.3	-0.027	Reduced affinity
L	H	142	Y	56	-0.047	Reduced affinity
L	S	143	A	97.2	0.001	Increased affinity
L	S	143	Y	97.2	0.001	Increased affinity
L	Q	146	H	52.3	0.024	Increased affinity
L	Q	146	R	52.3	-0.011	Reduced affinity
L	H	147	Q	53.6	-0.057	Reduced affinity
L	H	147	Y	53.6	-0.047	Reduced affinity
L	K	149	E	36.3	-0.047	Reduced affinity
L	K	149	R	36.3	-0.027	Reduced affinity
L	E	150	D	46.5	-0.042	Reduced affinity
L	L	151	M	46.2	-0.037	Reduced affinity
L	P	152	L	49.7	-0.045	Reduced affinity
L	P	152	S	49.7	-0.053	Reduced affinity
L	P	152	T	49.7	-0.055	Reduced affinity
L	T	155	S	49.8	-0.043	Reduced affinity
L	Y	156	H	27.7	-0.021	Reduced affinity
L	V	157	A	56.9	-0.041	Reduced affinity
L	V	157	T	56.9	-0.056	Reduced affinity
L	Q	158	H	56.8	0.025	Increased affinity
L	Q	158	R	56.8	-0.008	Reduced affinity
L	S	159	N	98.6	-0.054	Reduced affinity
L	N	160	T	72.2	-0.027	Reduced affinity
L	A	162	V	82.1	-0.046	Reduced affinity
L	A	164	I	114.2	-0.047	Reduced affinity
L	A	164	T	114.2	-0.059	Reduced affinity
L	E	165	D	62.3	-0.042	Reduced affinity
L	E	166	D	61.2	-0.042	Reduced affinity
L	I	167	M	45.3	-0.038	Reduced affinity
L	I	167	T	45.3	-0.054	Reduced affinity
L	I	167	V	45.3	-0.043	Reduced affinity
L	H	170	N	50.2	-0.054	Reduced affinity
L	M	171	V	42.4	-0.029	Reduced affinity
L	D	174	G	78.2	-0.005	Reduced affinity
L	R	178	H	35.6	0.003	Increased affinity
L	T	179	A	65.4	0.001	Increased affinity
L	L	180	I	35.5	-0.044	Reduced affinity
L	L	181	M	48.7	-0.038	Reduced affinity
L	L	181	T	48.7	-0.054	Reduced affinity
L	L	181	V	48.7	-0.043	Reduced affinity
L	S	182	L	82.6	-0.003	Reduced affinity
L	S	182	T	82.6	-0.045	Reduced affinity
L	Q	184	R	47.4	-0.011	Reduced affinity
L	S	185	A	66.9	0.001	Increased affinity
L	S	185	C	66.9	-0.043	Reduced affinity
L	S	185	Y	66.9	0.001	Increased affinity
L	G	186	S	159	-0.061	Reduced affinity
L	N	187	S	36.1	-0.027	Reduced affinity
L	K	189	T	27.8	-0.044	Reduced affinity
L	T	191	A	59.6	0.002	Increased affinity
L	T	191	I	59.6	-0.001	Reduced affinity
L	T	191	S	59.6	-0.042	Reduced affinity
L	G	194	C	229.1	-0.053	Reduced affinity
L	G	194	S	229.1	-0.058	Reduced affinity
L	G	194	N	229.1	-0.065	Reduced affinity
L	R	195	Q	34.7	-0.06	Reduced affinity
L	V	197	A	35.4	-0.041	Reduced affinity
L	V	197	E	35.4	-0.05	Reduced affinity
L	R	198	Q	21.1	-0.059	Reduced affinity
L	K	200	R	29.8	-0.027	Reduced affinity
L	N	202	D	59.3	-0.034	Reduced affinity
L	N	202	I	59.3	0.01	Increased affinity
L	N	202	S	59.3	-0.026	Reduced affinity
L	G	205	D	237.1	-0.052	Reduced affinity
L	G	205	S	237.1	-0.058	Reduced affinity
L	S	206	L	69.6	-0.004	Reduced affinity
L	N	207	D	60	-0.034	Reduced affinity
L	N	207	H	60	0.022	Increased affinity
L	N	207	S	60	-0.026	Reduced affinity
L	N	207	T	60	-0.027	Reduced affinity
L	E	208	D	65.9	-0.042	Reduced affinity
L	L	210	I	31.9	-0.043	Reduced affinity
L	L	210	Q	31.9	-0.067	Reduced affinity
L	L	210	S	31.9	-0.05	Reduced affinity
L	L	210	T	31.9	-0.053	Reduced affinity
L	L	210	V	31.9	-0.042	Reduced affinity
L	I	211	T	47.8	-0.053	Reduced affinity
L	T	213	I	74.3	-0.003	Reduced affinity
L	T	213	R	74.3	-0.023	Reduced affinity
L	D	214	N	71.8	-0.062	Reduced affinity
L	V	216	E	55.1	-0.05	Reduced affinity
L	V	216	M	55.1	-0.039	Reduced affinity
L	I	217	V	28.1	-0.043	Reduced affinity
L	N	218	G	79.3	0.016	Increased affinity
L	N	218	S	79.3	-0.027	Reduced affinity
L	N	219	S	59.5	-0.027	Reduced affinity
L	K	221	G	47.7	-0.001	Reduced affinity
L	K	221	I	47.7	-0.005	Reduced affinity
L	K	221	R	47.7	-0.028	Reduced affinity
L	V	222	I	48.1	-0.045	Reduced affinity
L	H	226	Y	50.6	-0.047	Reduced affinity
L	A	227	T	66.2	-0.062	Reduced affinity
L	A	227	V	66.2	-0.046	Reduced affinity
L	A	228	E	36.8	-0.051	Reduced affinity
L	A	228	T	36.8	-0.061	Reduced affinity
L	V	229	I	63.7	-0.045	Reduced affinity
L	N	231	D	79.9	-0.033	Reduced affinity
L	K	233	E	50.4	-0.047	Reduced affinity
L	K	233	R	50.4	-0.026	Reduced affinity
L	K	234	N	38.3	-0.052	Reduced affinity
L	K	234	R	38.3	-0.026	Reduced affinity
L	Y	237	C	30.8	-0.043	Reduced affinity
L	Y	237	D	30.8	-0.044	Reduced affinity
L	Y	237	F	30.8	-0.048	Reduced affinity
L	N	238	S	71.2	-0.027	Reduced affinity
L	P	240	L	39.1	-0.046	Reduced affinity
L	L	241	S	50.4	-0.055	Reduced affinity
L	V	242	G	33.8	-0.042	Reduced affinity
L	N	245	S	62.2	-0.027	Reduced affinity
L	A	246	D	106.2	-0.051	Reduced affinity
L	A	246	V	106.2	-0.047	Reduced affinity
L	E	247	A	62.3	-0.005	Reduced affinity
L	L	248	A	45.5	-0.04	Reduced affinity
L	L	248	F	45.5	-0.041	Reduced affinity
L	L	248	I	45.5	-0.045	Reduced affinity
L	L	248	P	45.5	-0.043	Reduced affinity
L	L	248	S	45.5	-0.052	Reduced affinity
L	K	252	H	35.6	0.013	Increased affinity
L	K	252	Q	35.6	-0.06	Reduced affinity
L	I	255	L	48.5	-0.043	Reduced affinity
L	I	255	V	48.5	-0.042	Reduced affinity
L	R	256	Y	35.5	-0.012	Reduced affinity
L	I	257	T	54.4	-0.054	Reduced affinity
L	I	257	V	54.4	-0.042	Reduced affinity
L	P	260	L	54.8	-0.045	Reduced affinity
L	P	260	S	54.8	-0.054	Reduced affinity
L	A	262	V	82.1	-0.046	Reduced affinity
L	V	264	A	50.4	-0.041	Reduced affinity
L	T	265	I	53.3	-0.003	Reduced affinity
L	M	267	R	29.3	-0.032	Reduced affinity
L	M	267	V	29.3	-0.029	Reduced affinity
L	V	268	G	58.2	-0.04	Reduced affinity
L	K	270	R	32.5	-0.028	Reduced affinity
L	A	271	V	90.8	-0.046	Reduced affinity
L	R	272	G	37.9	-0.01	Reduced affinity
L	N	273	I	82.8	0.011	Increased affinity
L	T	275	P	78.2	-0.001	Reduced affinity
L	T	277	A	69.5	0.001	Increased affinity
L	T	277	M	69.5	-0.005	Reduced affinity
L	T	277	S	69.5	-0.043	Reduced affinity
L	G	279	E	152.2	-0.052	Reduced affinity
L	G	279	R	152.2	-0.047	Reduced affinity
L	K	280	R	48.5	-0.028	Reduced affinity
L	N	281	K	83.5	-0.024	Reduced affinity
L	Q	282	K	35.5	-0.02	Reduced affinity
L	I	284	T	25.4	-0.053	Reduced affinity
L	I	284	V	25.4	-0.042	Reduced affinity
L	M	285	L	29.8	-0.03	Reduced affinity
L	L	286	S	36.7	-0.051	Reduced affinity
L	L	286	V	36.7	-0.042	Reduced affinity
L	Y	288	C	35.5	-0.042	Reduced affinity
L	Y	288	H	35.5	-0.022	Reduced affinity
L	L	294	F	31.9	-0.04	Reduced affinity
L	Y	297	C	25.3	-0.043	Reduced affinity
L	Y	297	F	25.3	-0.048	Reduced affinity
L	S	299	K	54.3	-0.041	Reduced affinity
L	S	299	N	54.3	-0.055	Reduced affinity
L	E	302	Q	56.7	-0.067	Reduced affinity
L	E	303	K	59.4	-0.038	Reduced affinity
L	P	304	S	65.5	-0.055	Reduced affinity
L	P	304	T	65.5	-0.057	Reduced affinity
L	N	305	H	78.7	0.022	Increased affinity
L	Y	306	S	32.1	-0.046	Reduced affinity
L	Q	307	H	53.3	0.024	Increased affinity
L	Q	307	L	53.3	0.016	Increased affinity
L	Q	307	R	53.3	-0.009	Reduced affinity
L	Q	307	S	53.3	-0.022	Reduced affinity
L	E	308	H	46	0.007	Increased affinity
L	E	308	K	46	-0.038	Reduced affinity
L	E	308	Q	46	-0.067	Reduced affinity
L	E	309	Q	56.6	-0.067	Reduced affinity
L	T	312	A	53.1	0.001	Increased affinity
L	T	312	M	53.1	-0.004	Reduced affinity
L	H	313	L	50.9	-0.043	Reduced affinity
L	H	313	P	50.9	-0.043	Reduced affinity
L	H	313	R	50.9	-0.055	Reduced affinity
L	H	313	Y	50.9	-0.047	Reduced affinity
L	K	314	R	33.3	-0.028	Reduced affinity
L	E	316	G	50.5	-0.004	Reduced affinity
L	E	316	K	50.5	-0.037	Reduced affinity
L	V	317	I	58.1	-0.045	Reduced affinity
L	V	318	A	47.8	-0.04	Reduced affinity
L	V	318	M	47.8	-0.038	Reduced affinity
L	V	318	R	47.8	-0.041	Reduced affinity
L	V	318	T	47.8	-0.054	Reduced affinity
L	L	319	I	44.2	-0.044	Reduced affinity
L	L	319	V	44.2	-0.042	Reduced affinity
L	T	320	A	76.4	0.002	Increased affinity
L	T	320	I	76.4	-0.002	Reduced affinity
L	V	321	G	49.1	-0.04	Reduced affinity
L	V	328	A	37.6	-0.042	Reduced affinity
L	V	328	I	37.6	-0.046	Reduced affinity
L	W	330	C	32.4	-0.033	Reduced affinity
L	G	331	D	157.4	-0.052	Reduced affinity
L	N	333	K	72.8	-0.023	Reduced affinity
L	E	334	G	66.2	-0.004	Reduced affinity
L	E	334	V	66.2	-0.006	Reduced affinity
L	P	335	L	48.8	-0.045	Reduced affinity
L	K	337	E	38.2	-0.045	Reduced affinity
L	K	337	R	38.2	-0.029	Reduced affinity
L	Q	341	H	52.7	0.024	Increased affinity
L	L	342	M	51.4	-0.039	Reduced affinity
L	S	343	P	55.7	-0.002	Reduced affinity
L	A	344	T	74.2	-0.061	Reduced affinity
L	G	346	S	213.3	-0.06	Reduced affinity
L	G	350	S	237.9	-0.06	Reduced affinity
L	H	351	E	47.3	-0.046	Reduced affinity
L	H	351	N	47.3	-0.053	Reduced affinity
L	H	351	Q	47.3	-0.056	Reduced affinity
L	H	351	R	47.3	-0.055	Reduced affinity
L	H	351	Y	47.3	-0.047	Reduced affinity
L	P	352	V	58.5	-0.044	Reduced affinity
L	H	353	A	54.4	-0.041	Reduced affinity
L	H	353	E	54.4	-0.046	Reduced affinity
L	H	353	Q	54.4	-0.056	Reduced affinity
L	H	353	R	54.4	-0.054	Reduced affinity
L	H	353	Y	54.4	-0.047	Reduced affinity
L	E	354	D	63.8	-0.042	Reduced affinity
L	I	356	F	46.7	-0.041	Reduced affinity
L	I	356	Y	46.7	-0.036	Reduced affinity
L	L	357	E	37.2	-0.049	Reduced affinity
L	L	357	Q	37.2	-0.068	Reduced affinity
L	L	357	R	37.2	-0.041	Reduced affinity
L	Y	358	S	34.2	-0.047	Reduced affinity
L	E	361	G	56.3	-0.004	Reduced affinity
L	M	366	I	42.6	-0.03	Reduced affinity
L	M	366	K	42.6	-0.04	Reduced affinity
L	M	366	T	42.6	-0.039	Reduced affinity
L	M	366	V	42.6	-0.029	Reduced affinity
L	V	368	A	39	-0.041	Reduced affinity
L	V	369	I	37.3	-0.045	Reduced affinity
L	V	370	I	44.2	-0.045	Reduced affinity
L	V	370	A	44.2	-0.041	Reduced affinity
L	V	371	L	46.1	-0.045	Reduced affinity
L	V	371	M	46.1	-0.039	Reduced affinity
L	S	372	A	74.1	-0.001	Reduced affinity
L	V	373	A	46.9	-0.04	Reduced affinity
L	A	374	V	78	-0.046	Reduced affinity
L	S	375	L	76.2	-0.004	Reduced affinity
L	S	375	T	76.2	-0.045	Reduced affinity
L	F	376	C	34.2	-0.039	Reduced affinity
L	I	377	T	39.2	-0.053	Reduced affinity
L	I	377	V	39.2	-0.043	Reduced affinity
L	S	380	A	73.7	-0.001	Reduced affinity
L	S	380	T	73.7	-0.045	Reduced affinity
L	V	382	M	46.4	-0.039	Reduced affinity
L	M	384	A	36.1	-0.027	Reduced affinity
L	M	384	T	36.1	-0.04	Reduced affinity
L	M	384	V	36.1	-0.029	Reduced affinity
L	A	385	T	60.8	-0.06	Reduced affinity
L	V	386	A	46.6	-0.042	Reduced affinity
L	G	387	W	166.3	-0.032	Reduced affinity
L	C	389	Y	53.1	0.006	Increased affinity
L	M	390	I	34.4	-0.03	Reduced affinity
L	M	390	V	34.4	-0.029	Reduced affinity
L	C	391	Y	54.7	0.006	Increased affinity
L	R	395	G	28	-0.01	Reduced affinity
L	R	395	I	28	-0.013	Reduced affinity
L	R	395	N	28	-0.056	Reduced affinity
L	I	397	L	33.1	-0.045	Reduced affinity
L	P	404	T	56.5	-0.058	Reduced affinity
L	G	405	R	219	-0.048	Reduced affinity
L	G	405	S	219	-0.061	Reduced affinity
L	G	405	T	219	-0.062	Reduced affinity
L	A	406	T	61.1	-0.06	Reduced affinity
L	A	406	Y	61.1	-0.038	Reduced affinity
L	T	407	A	75.5	0.001	Increased affinity
L	V	408	I	66.1	-0.045	Reduced affinity
L	P	409	A	55.1	-0.041	Reduced affinity
L	P	409	L	55.1	-0.045	Reduced affinity
L	P	409	S	55.1	-0.052	Reduced affinity
L	L	412	V	46.1	-0.043	Reduced affinity
L	S	413	G	53.5	0.001	Increased affinity
L	S	413	N	53.5	-0.054	Reduced affinity
L	I	415	L	56.5	-0.044	Reduced affinity
L	I	415	M	56.5	-0.038	Reduced affinity
L	I	415	T	56.5	-0.053	Reduced affinity
L	I	415	V	56.5	-0.042	Reduced affinity
L	C	416	G	57.1	0.008	Increased affinity
Q	N	5	H	108.5	0.022	Increased affinity
Q	N	5	R	108.5	-0.011	Reduced affinity
Q	F	6	L	48.3	-0.038	Reduced affinity
Q	F	6	S	48.3	-0.04	Reduced affinity
Q	F	6	Y	48.3	-0.038	Reduced affinity
Q	N	7	D	80.7	-0.035	Reduced affinity
Q	N	7	T	80.7	-0.027	Reduced affinity
Q	V	8	A	61.2	-0.04	Reduced affinity
Q	A	11	V	98.4	-0.046	Reduced affinity
Q	T	12	I	47.6	-0.001	Reduced affinity
Q	R	13	K	39.1	-0.052	Reduced affinity
Q	P	14	Q	41.1	-0.071	Reduced affinity
Q	H	18	P	35.2	-0.042	Reduced affinity
Q	H	18	Q	35.2	-0.057	Reduced affinity
Q	H	18	R	35.2	-0.057	Reduced affinity
Q	C	19	G	39.2	0.01	Increased affinity
Q	C	19	R	39.2	-0.013	Reduced affinity
Q	D	21	V	33.5	-0.007	Reduced affinity
Q	G	23	A	236.2	-0.045	Reduced affinity
Q	G	23	E	236.2	-0.052	Reduced affinity
Q	H	26	Y	46.9	-0.047	Reduced affinity
Q	S	27	P	68.3	-0.002	Reduced affinity
Q	V	32	I	47.1	-0.045	Reduced affinity
Q	A	33	V	34.6	-0.046	Reduced affinity
Q	L	34	I	41.7	-0.044	Reduced affinity
Q	R	36	H	17.1	0.004	Increased affinity
Q	I	37	L	38.6	-0.044	Reduced affinity
Q	I	37	V	38.6	-0.042	Reduced affinity
Q	N	39	S	71.9	-0.026	Reduced affinity
Q	T	42	I	61.8	-0.001	Reduced affinity
Q	T	45	R	60.8	-0.023	Reduced affinity
Q	L	46	Q	38.8	-0.069	Reduced affinity
Q	K	47	H	29.6	0.016	Increased affinity
Q	K	47	N	29.6	-0.052	Reduced affinity
Q	I	48	L	30.6	-0.043	Reduced affinity
Q	V	50	I	35.1	-0.045	Reduced affinity
Q	L	52	F	31.9	-0.04	Reduced affinity
Q	I	54	L	36.5	-0.043	Reduced affinity
Q	G	55	R	116.8	-0.046	Reduced affinity
Q	I	56	L	35.8	-0.043	Reduced affinity
Q	I	56	T	35.8	-0.053	Reduced affinity
Q	G	57	K	243.3	-0.06	Reduced affinity
Q	G	57	Q	243.3	-0.074	Reduced affinity
Q	G	57	R	243.3	-0.046	Reduced affinity
Q	D	60	G	59.2	-0.004	Reduced affinity
Q	S	61	G	90.6	0.001	Increased affinity
Q	S	61	N	90.6	-0.054	Reduced affinity
Q	H	62	Y	57.9	-0.048	Reduced affinity
Q	D	63	G	68.4	-0.004	Reduced affinity
Q	W	64	R	31.2	-0.027	Reduced affinity
Q	K	66	E	29.2	-0.046	Reduced affinity
Q	Y	69	H	30.6	-0.02	Reduced affinity
Q	Y	69	I	30.6	-0.042	Reduced affinity
Q	N	72	S	83.5	-0.026	Reduced affinity
Q	N	72	T	83.5	-0.027	Reduced affinity
Q	H	73	Y	56	-0.047	Reduced affinity
Q	I	74	L	47.8	-0.043	Reduced affinity
Q	I	74	M	47.8	-0.037	Reduced affinity
Q	I	74	T	47.8	-0.053	Reduced affinity
Q	I	74	V	47.8	-0.042	Reduced affinity
Q	A	76	T	86	-0.059	Reduced affinity
Q	G	79	E	158.6	-0.052	Reduced affinity
Q	A	81	V	108.1	-0.046	Reduced affinity
Q	G	82	R	185.7	-0.045	Reduced affinity
Q	L	83	I	41.7	-0.043	Reduced affinity
Q	F	84	L	41.6	-0.038	Reduced affinity
Q	F	84	I	41.6	-0.038	Reduced affinity
Q	F	84	S	41.6	-0.042	Reduced affinity
Q	V	85	A	44.4	-0.041	Reduced affinity
Q	R	86	K	23.2	-0.052	Reduced affinity
Q	T	87	S	36.2	-0.043	Reduced affinity
Q	S	88	L	93.9	-0.003	Reduced affinity
Q	A	89	S	97.8	-0.059	Reduced affinity
Q	P	90	L	55.8	-0.045	Reduced affinity
Q	P	90	S	55.8	-0.054	Reduced affinity
Q	T	92	A	69.7	0.002	Increased affinity
Q	T	92	M	69.7	-0.004	Reduced affinity
Q	T	92	S	69.7	-0.043	Reduced affinity
Q	T	94	I	56.4	-0.002	Reduced affinity
Q	M	97	T	40.4	-0.04	Reduced affinity
Q	M	97	I	40.4	-0.029	Reduced affinity
Q	A	103	T	42.4	-0.061	Reduced affinity
Q	K	107	R	48.9	-0.027	Reduced affinity
Q	G	108	R	112.5	-0.046	Reduced affinity
Q	T	110	I	39.5	-0.001	Reduced affinity
Q	T	110	S	39.5	-0.043	Reduced affinity
Q	L	111	M	30.9	-0.038	Reduced affinity
Q	L	111	V	30.9	-0.043	Reduced affinity
Q	V	113	A	39.5	-0.04	Reduced affinity
Q	F	115	L	35.9	-0.038	Reduced affinity
Q	T	116	I	83.3	-0.002	Reduced affinity
Q	S	118	G	108.4	0.001	Increased affinity
Q	R	119	S	40.3	-0.044	Reduced affinity
Q	R	119	W	40.3	-0.012	Reduced affinity
Q	K	120	M	41.4	-0.007	Reduced affinity
Q	K	120	N	41.4	-0.052	Reduced affinity
Q	K	120	S	41.4	-0.042	Reduced affinity
Q	I	121	F	44.4	-0.04	Reduced affinity
Q	I	121	L	44.4	-0.043	Reduced affinity
Q	I	121	M	44.4	-0.037	Reduced affinity
Q	I	121	N	44.4	-0.058	Reduced affinity
Q	I	121	S	44.4	-0.05	Reduced affinity
Q	I	121	T	44.4	-0.052	Reduced affinity
Q	I	121	V	44.4	-0.042	Reduced affinity
Q	S	122	G	92.9	0.001	Increased affinity
Q	S	122	Q	92.9	-0.061	Reduced affinity
Q	S	122	R	92.9	-0.023	Reduced affinity
Q	H	123	L	48	-0.044	Reduced affinity
Q	H	123	P	48	-0.043	Reduced affinity
Q	H	123	R	48	-0.056	Reduced affinity
Q	H	123	T	48	-0.047	Reduced affinity
Q	S	124	T	57.7	-0.045	Reduced affinity
Q	T	126	M	67.6	-0.003	Reduced affinity
Q	P	128	S	45.3	-0.055	Reduced affinity
Q	H	130	R	39.4	-0.055	Reduced affinity
Q	H	131	L	46.1	-0.043	Reduced affinity
Q	H	131	Y	46.1	-0.047	Reduced affinity
Q	D	132	N	79.4	-0.062	Reduced affinity
Q	D	132	E	79.4	-0.045	Reduced affinity
Q	P	133	S	56.3	-0.053	Reduced affinity
Q	P	134	L	62.4	-0.045	Reduced affinity
Q	V	135	A	38.8	-0.041	Reduced affinity
Q	V	135	G	38.8	-0.039	Reduced affinity
Q	V	135	M	38.8	-0.039	Reduced affinity
Q	K	140	R	44.3	-0.027	Reduced affinity
Q	H	142	Y	56	-0.047	Reduced affinity
Q	S	143	A	97.2	0.001	Increased affinity
Q	S	143	Y	97.2	0.001	Increased affinity
Q	Q	146	H	52.3	0.024	Increased affinity
Q	Q	146	R	52.3	-0.011	Reduced affinity
Q	H	147	Q	53.6	-0.057	Reduced affinity
Q	H	147	Y	53.6	-0.047	Reduced affinity
Q	K	149	E	36.3	-0.047	Reduced affinity
Q	K	149	R	36.3	-0.027	Reduced affinity
Q	E	150	D	46.5	-0.042	Reduced affinity
Q	L	151	M	46.2	-0.038	Reduced affinity
Q	P	152	L	49.7	-0.045	Reduced affinity
Q	P	152	S	49.7	-0.053	Reduced affinity
Q	P	152	T	49.7	-0.055	Reduced affinity
Q	T	155	S	49.8	-0.043	Reduced affinity
Q	Y	156	H	27.7	-0.022	Reduced affinity
Q	V	157	A	56.9	-0.041	Reduced affinity
Q	V	157	T	56.9	-0.056	Reduced affinity
Q	Q	158	H	56.8	0.025	Increased affinity
Q	Q	158	R	56.8	-0.008	Reduced affinity
Q	S	159	N	98.6	-0.054	Reduced affinity
Q	N	160	T	72.2	-0.027	Reduced affinity
Q	A	162	V	82.1	-0.046	Reduced affinity
Q	A	164	I	114.2	-0.047	Reduced affinity
Q	A	164	T	114.2	-0.059	Reduced affinity
Q	E	165	D	62.3	-0.042	Reduced affinity
Q	E	166	D	61.2	-0.042	Reduced affinity
Q	I	167	M	45.3	-0.038	Reduced affinity
Q	I	167	T	45.3	-0.054	Reduced affinity
Q	I	167	V	45.3	-0.043	Reduced affinity
Q	H	170	N	50.2	-0.054	Reduced affinity
Q	M	171	V	42.4	-0.029	Reduced affinity
Q	D	174	G	78.2	-0.005	Reduced affinity
Q	R	178	H	35.6	0.003	Increased affinity
Q	T	179	A	65.4	0.001	Increased affinity
Q	L	180	I	35.5	-0.044	Reduced affinity
Q	L	181	M	48.7	-0.038	Reduced affinity
Q	L	181	T	48.7	-0.055	Reduced affinity
Q	L	181	V	48.7	-0.043	Reduced affinity
Q	S	182	L	82.6	-0.003	Reduced affinity
Q	S	182	T	82.6	-0.045	Reduced affinity
Q	Q	184	R	47.4	-0.011	Reduced affinity
Q	S	185	A	66.9	0.002	Increased affinity
Q	S	185	C	66.9	-0.043	Reduced affinity
Q	S	185	Y	66.9	0.002	Increased affinity
Q	G	186	S	159	-0.061	Reduced affinity
Q	N	187	S	36.1	-0.027	Reduced affinity
Q	K	189	T	27.8	-0.044	Reduced affinity
Q	T	191	A	59.6	0.002	Increased affinity
Q	T	191	I	59.6	-0.001	Reduced affinity
Q	T	191	S	59.6	-0.043	Reduced affinity
Q	G	194	C	229.1	-0.053	Reduced affinity
Q	G	194	S	229.1	-0.058	Reduced affinity
Q	G	194	N	229.1	-0.065	Reduced affinity
Q	R	195	Q	34.7	-0.06	Reduced affinity
Q	V	197	A	35.4	-0.041	Reduced affinity
Q	V	197	E	35.4	-0.05	Reduced affinity
Q	R	198	Q	21.1	-0.06	Reduced affinity
Q	K	200	R	29.8	-0.027	Reduced affinity
Q	N	202	D	59.3	-0.034	Reduced affinity
Q	N	202	I	59.3	0.011	Increased affinity
Q	N	202	S	59.3	-0.026	Reduced affinity
Q	G	205	D	237.1	-0.052	Reduced affinity
Q	G	205	S	237.1	-0.058	Reduced affinity
Q	S	206	L	69.6	-0.004	Reduced affinity
Q	N	207	D	60	-0.034	Reduced affinity
Q	N	207	H	60	0.022	Increased affinity
Q	N	207	S	60	-0.026	Reduced affinity
Q	N	207	T	60	-0.027	Reduced affinity
Q	E	208	D	65.9	-0.042	Reduced affinity
Q	L	210	I	31.9	-0.043	Reduced affinity
Q	L	210	Q	31.9	-0.067	Reduced affinity
Q	L	210	S	31.9	-0.05	Reduced affinity
Q	L	210	T	31.9	-0.053	Reduced affinity
Q	L	210	V	31.9	-0.042	Reduced affinity
Q	I	211	T	47.8	-0.053	Reduced affinity
Q	T	213	I	74.3	-0.002	Reduced affinity
Q	T	213	R	74.3	-0.023	Reduced affinity
Q	D	214	N	71.8	-0.063	Reduced affinity
Q	V	216	E	55.1	-0.05	Reduced affinity
Q	V	216	M	55.1	-0.039	Reduced affinity
Q	I	217	V	28.1	-0.043	Reduced affinity
Q	N	218	G	79.3	0.016	Increased affinity
Q	N	218	S	79.3	-0.027	Reduced affinity
Q	N	219	S	59.5	-0.027	Reduced affinity
Q	K	221	G	47.7	0	Increased affinity
Q	K	221	I	47.7	-0.005	Reduced affinity
Q	K	221	R	47.7	-0.028	Reduced affinity
Q	V	222	I	48.1	-0.045	Reduced affinity
Q	H	226	Y	50.6	-0.047	Reduced affinity
Q	A	227	T	66.2	-0.061	Reduced affinity
Q	A	227	V	66.2	-0.046	Reduced affinity
Q	A	228	E	36.8	-0.051	Reduced affinity
Q	A	228	T	36.8	-0.061	Reduced affinity
Q	V	229	I	63.7	-0.045	Reduced affinity
Q	N	231	D	79.9	-0.034	Reduced affinity
Q	K	233	E	50.4	-0.047	Reduced affinity
Q	K	233	R	50.4	-0.026	Reduced affinity
Q	K	234	N	38.3	-0.052	Reduced affinity
Q	K	234	R	38.3	-0.026	Reduced affinity
Q	Y	237	C	30.8	-0.043	Reduced affinity
Q	Y	237	D	30.8	-0.044	Reduced affinity
Q	Y	237	F	30.8	-0.048	Reduced affinity
Q	N	238	S	71.2	-0.027	Reduced affinity
Q	P	240	L	39.1	-0.046	Reduced affinity
Q	L	241	S	50.4	-0.054	Reduced affinity
Q	V	242	G	33.8	-0.041	Reduced affinity
Q	N	245	S	62.2	-0.027	Reduced affinity
Q	A	246	D	106.2	-0.051	Reduced affinity
Q	A	246	V	106.2	-0.046	Reduced affinity
Q	E	247	A	62.3	-0.005	Reduced affinity
Q	L	248	A	45.5	-0.04	Reduced affinity
Q	L	248	F	45.5	-0.041	Reduced affinity
Q	L	248	I	45.5	-0.045	Reduced affinity
Q	L	248	P	45.5	-0.043	Reduced affinity
Q	L	248	S	45.5	-0.052	Reduced affinity
Q	K	252	H	35.6	0.013	Increased affinity
Q	K	252	Q	35.6	-0.06	Reduced affinity
Q	I	255	L	48.5	-0.044	Reduced affinity
Q	I	255	V	48.5	-0.042	Reduced affinity
Q	R	256	Y	35.5	-0.012	Reduced affinity
Q	I	257	T	54.4	-0.054	Reduced affinity
Q	I	257	V	54.4	-0.042	Reduced affinity
Q	P	260	L	54.8	-0.045	Reduced affinity
Q	P	260	S	54.8	-0.055	Reduced affinity
Q	A	262	V	82.1	-0.046	Reduced affinity
Q	V	264	A	50.4	-0.041	Reduced affinity
Q	T	265	I	53.3	-0.003	Reduced affinity
Q	M	267	R	29.3	-0.031	Reduced affinity
Q	M	267	V	29.3	-0.029	Reduced affinity
Q	V	268	G	58.2	-0.039	Reduced affinity
Q	K	270	R	32.5	-0.027	Reduced affinity
Q	A	271	V	90.8	-0.046	Reduced affinity
Q	R	272	G	37.9	-0.011	Reduced affinity
Q	N	273	I	82.8	0.011	Increased affinity
Q	T	275	P	78.2	-0.001	Reduced affinity
Q	T	277	A	69.5	0.001	Increased affinity
Q	T	277	M	69.5	-0.005	Reduced affinity
Q	T	277	S	69.5	-0.043	Reduced affinity
Q	G	279	E	152.2	-0.052	Reduced affinity
Q	G	279	R	152.2	-0.047	Reduced affinity
Q	K	280	R	48.5	-0.029	Reduced affinity
Q	N	281	K	83.5	-0.024	Reduced affinity
Q	Q	282	K	35.5	-0.02	Reduced affinity
Q	I	284	T	25.4	-0.053	Reduced affinity
Q	I	284	V	25.4	-0.043	Reduced affinity
Q	M	285	L	29.8	-0.03	Reduced affinity
Q	L	286	S	36.7	-0.05	Reduced affinity
Q	L	286	V	36.7	-0.042	Reduced affinity
Q	Y	288	C	35.5	-0.042	Reduced affinity
Q	Y	288	H	35.5	-0.021	Reduced affinity
Q	L	294	F	31.9	-0.04	Reduced affinity
Q	Y	297	C	25.3	-0.043	Reduced affinity
Q	Y	297	F	25.3	-0.048	Reduced affinity
Q	S	299	K	54.3	-0.04	Reduced affinity
Q	S	299	N	54.3	-0.055	Reduced affinity
Q	E	302	Q	56.7	-0.067	Reduced affinity
Q	E	303	K	59.4	-0.038	Reduced affinity
Q	P	304	S	65.5	-0.054	Reduced affinity
Q	P	304	T	65.5	-0.056	Reduced affinity
Q	N	305	H	78.7	0.022	Increased affinity
Q	Y	306	S	32.1	-0.046	Reduced affinity
Q	Q	307	H	53.3	0.024	Increased affinity
Q	Q	307	L	53.3	0.016	Increased affinity
Q	Q	307	R	53.3	-0.009	Reduced affinity
Q	Q	307	S	53.3	-0.022	Reduced affinity
Q	E	308	H	46	0.007	Increased affinity
Q	E	308	K	46	-0.038	Reduced affinity
Q	E	308	Q	46	-0.067	Reduced affinity
Q	E	309	Q	56.6	-0.067	Reduced affinity
Q	T	312	A	53.1	0.001	Increased affinity
Q	T	312	M	53.1	-0.005	Reduced affinity
Q	H	313	L	50.9	-0.044	Reduced affinity
Q	H	313	P	50.9	-0.043	Reduced affinity
Q	H	313	R	50.9	-0.054	Reduced affinity
Q	H	313	Y	50.9	-0.047	Reduced affinity
Q	K	314	R	33.3	-0.027	Reduced affinity
Q	E	316	G	50.5	-0.004	Reduced affinity
Q	E	316	K	50.5	-0.037	Reduced affinity
Q	V	317	I	58.1	-0.045	Reduced affinity
Q	V	318	A	47.8	-0.04	Reduced affinity
Q	V	318	M	47.8	-0.038	Reduced affinity
Q	V	318	R	47.8	-0.041	Reduced affinity
Q	V	318	T	47.8	-0.054	Reduced affinity
Q	L	319	I	44.2	-0.044	Reduced affinity
Q	L	319	V	44.2	-0.042	Reduced affinity
Q	T	320	A	76.4	0.002	Increased affinity
Q	T	320	I	76.4	-0.002	Reduced affinity
Q	V	321	G	49.1	-0.04	Reduced affinity
Q	V	328	A	37.6	-0.042	Reduced affinity
Q	V	328	I	37.6	-0.046	Reduced affinity
Q	W	330	C	32.4	-0.033	Reduced affinity
Q	G	331	D	157.4	-0.052	Reduced affinity
Q	N	333	K	72.8	-0.022	Reduced affinity
Q	E	334	G	66.2	-0.004	Reduced affinity
Q	E	334	V	66.2	-0.006	Reduced affinity
Q	P	335	L	48.8	-0.045	Reduced affinity
Q	K	337	E	38.2	-0.045	Reduced affinity
Q	K	337	R	38.2	-0.029	Reduced affinity
Q	Q	341	H	52.7	0.025	Increased affinity
Q	L	342	M	51.4	-0.039	Reduced affinity
Q	S	343	P	55.7	-0.002	Reduced affinity
Q	A	344	T	74.2	-0.061	Reduced affinity
Q	G	346	S	213.3	-0.059	Reduced affinity
Q	G	350	S	237.9	-0.059	Reduced affinity
Q	H	351	E	47.3	-0.046	Reduced affinity
Q	H	351	N	47.3	-0.053	Reduced affinity
Q	H	351	Q	47.3	-0.056	Reduced affinity
Q	H	351	R	47.3	-0.055	Reduced affinity
Q	H	351	Y	47.3	-0.047	Reduced affinity
Q	P	352	V	58.5	-0.044	Reduced affinity
Q	H	353	A	54.4	-0.041	Reduced affinity
Q	H	353	E	54.4	-0.046	Reduced affinity
Q	H	353	Q	54.4	-0.056	Reduced affinity
Q	H	353	R	54.4	-0.054	Reduced affinity
Q	H	353	Y	54.4	-0.047	Reduced affinity
Q	E	354	D	63.8	-0.042	Reduced affinity
Q	I	356	F	46.7	-0.041	Reduced affinity
Q	I	356	Y	46.7	-0.036	Reduced affinity
Q	L	357	E	37.2	-0.049	Reduced affinity
Q	L	357	Q	37.2	-0.067	Reduced affinity
Q	L	357	R	37.2	-0.041	Reduced affinity
Q	Y	358	S	34.2	-0.046	Reduced affinity
Q	E	361	G	56.3	-0.004	Reduced affinity
Q	M	366	I	42.6	-0.03	Reduced affinity
Q	M	366	K	42.6	-0.04	Reduced affinity
Q	M	366	T	42.6	-0.039	Reduced affinity
Q	M	366	V	42.6	-0.029	Reduced affinity
Q	V	368	A	39	-0.041	Reduced affinity
Q	V	369	I	37.3	-0.045	Reduced affinity
Q	V	370	I	44.2	-0.045	Reduced affinity
Q	V	370	A	44.2	-0.041	Reduced affinity
Q	V	371	L	46.1	-0.045	Reduced affinity
Q	V	371	M	46.1	-0.039	Reduced affinity
Q	S	372	A	74.1	-0.001	Reduced affinity
Q	V	373	A	46.9	-0.04	Reduced affinity
Q	A	374	V	78	-0.046	Reduced affinity
Q	S	375	L	76.2	-0.005	Reduced affinity
Q	S	375	T	76.2	-0.045	Reduced affinity
Q	F	376	C	34.2	-0.039	Reduced affinity
Q	I	377	T	39.2	-0.052	Reduced affinity
Q	I	377	V	39.2	-0.042	Reduced affinity
Q	S	380	A	73.7	-0.001	Reduced affinity
Q	S	380	T	73.7	-0.045	Reduced affinity
Q	V	382	M	46.4	-0.039	Reduced affinity
Q	M	384	A	36.1	-0.027	Reduced affinity
Q	M	384	T	36.1	-0.039	Reduced affinity
Q	M	384	V	36.1	-0.029	Reduced affinity
Q	A	385	T	60.8	-0.059	Reduced affinity
Q	V	386	A	46.6	-0.041	Reduced affinity
Q	G	387	W	166.3	-0.032	Reduced affinity
Q	C	389	Y	53.1	0.006	Increased affinity
Q	M	390	I	34.4	-0.03	Reduced affinity
Q	M	390	V	34.4	-0.029	Reduced affinity
Q	C	391	Y	54.7	0.006	Increased affinity
Q	R	395	G	28	-0.011	Reduced affinity
Q	R	395	I	28	-0.014	Reduced affinity
Q	R	395	N	28	-0.057	Reduced affinity
Q	I	397	L	33.1	-0.044	Reduced affinity
Q	P	404	T	56.5	-0.056	Reduced affinity
Q	G	405	R	219	-0.046	Reduced affinity
Q	G	405	S	219	-0.059	Reduced affinity
Q	G	405	T	219	-0.06	Reduced affinity
Q	A	406	T	61.1	-0.059	Reduced affinity
Q	A	406	Y	61.1	-0.038	Reduced affinity
Q	T	407	A	75.5	0	Increased affinity
Q	V	408	I	66.1	-0.045	Reduced affinity
Q	P	409	A	55.1	-0.041	Reduced affinity
Q	P	409	L	55.1	-0.045	Reduced affinity
Q	P	409	S	55.1	-0.052	Reduced affinity
Q	L	412	V	46.1	-0.042	Reduced affinity
Q	S	413	G	53.5	0.001	Increased affinity
Q	S	413	N	53.5	-0.054	Reduced affinity
Q	I	415	L	56.5	-0.044	Reduced affinity
Q	I	415	M	56.5	-0.037	Reduced affinity
Q	I	415	T	56.5	-0.052	Reduced affinity
Q	I	415	V	56.5	-0.042	Reduced affinity
Q	C	416	G	57.1	0.008	Increased affinity
B	R	256	H	35.5	0.003	Increased affinity
G	R	256	H	35.5	0.003	Increased affinity
L	R	256	H	35.5	0.003	Increased affinity
Q	R	256	H	35.5	0.003	Increased affinity
